# Supplementary material for: Development of photochromic fused 2H-naphthopyrans with promising thermal fading rates
Source: Royal Society of Chemistry journal article supplement (doi:10.1039/d1tc06105d), 2022-01-01
Supplement: d1tc06105d1.pdf [file d1tc06105d1.pdf]

## *Supporting Information*

### **Development of Photochromic Fused 2H-Naphthopyrans with Promising Thermal Fading Rates**

Taishan Yan,<sup>[a]</sup> Xi Tu,<sup>[a]</sup> Zhiqiang Xi,<sup>[a]</sup> Siyi Du,<sup>[a]</sup> Jie Han,<sup>\*[a,b]</sup> Bin Zhao,<sup>[b]</sup> and

Zhengjie He<sup>[a]</sup>

*[a]State Key Laboratory of Elemento-Organic Chemistry, College of Chemistry, Nankai University, 94 Weijin Road, Tianjin 300071 (China);*

*[b]Key Laboratory of Advanced Energy Material Chemistry, College of Chemistry, Nankai University, 94 Weijin Road, Tianjin 300071 (China)*

E-mail: hanjie@nankai.edu.cn

## CONTENTS

|                                                         |             |
|---------------------------------------------------------|-------------|
| <b>1. General Information.....</b>                      | <b>S3</b>   |
| <b>2. Synthesis.....</b>                                | <b>S4</b>   |
| <b>3. Crystal data of 5NP-F-b.....</b>                  | <b>S16</b>  |
| <b>4. NMR Spectra.....</b>                              | <b>S17</b>  |
| <b>5. HR-ESI-TOF-MS Spectra.....</b>                    | <b>S61</b>  |
| <b>6. Transient UV–Vis Absorption Spectroscopy.....</b> | <b>S74</b>  |
| <b>7. DFT Calculations.....</b>                         | <b>S75</b>  |
| <b>8. Reference.....</b>                                | <b>S126</b> |

## 1. General Information

**Transient Absorption Spectroscopy.** UV–vis absorption spectra were measured with a UV-3600 Plus UV-vis-NIR spectrophotometer equipped with a temperature-controlled cell holder (Shimadzu Corp.). Light irradiation was carried out using a solar simulator with a xenon 300W lamp, 200–2000nm (EOS Technologies Inc.) or a UV-LED (UV-400, Keyence), equipped with a UV-L6 lens unit (365 nm, 260 mW). The transient absorption spectra and the time variation were recorded on a USB 4000 multichannel detector (Ocean Optics, Inc.).

**Computational Details.** All DFT calculations were conducted by using Gaussian 09.<sup>1</sup> Geometry optimizations were carried out at the M06-2X level of theory with the SDD basis set for copper and the 6-31+G(d,p) basis set for the other atoms. Vibrational frequencies were computed to check whether each optimized structure is an energy minimum or a transition state. To obtain more accurate electronic energies, single-point energy calculations were performed at the SMD<sup>2</sup>-M06-2X/ 6-311++g(d,p) level with the M06-2X/6-31+G(d,p) optimized structures. TDDFT calculations were performed at the MPW1PW91/6-31+G(d,p) level of the theory for the optimized structures. The HOMO orbital coefficient was calculated by using the NBO<sup>3,4</sup> module of Gaussian 09, NCILOT<sup>5,6</sup> and Multiwfn.<sup>7,8</sup> The structures of molecules were generated using CYLView<sup>9</sup> and VMD.<sup>10</sup>

**Synthesis and Characterization.** All air- and moisture-sensitive manipulations were carried out under nitrogen atmosphere with standard Schlenk technique. All glassware was washed with distilled water and dried. Column chromatography was performed using 200-300 mesh silica gels. The NMR spectra were recorded on a Bruker-400 instrument and chemical shifts are reported in ppm relative to the residual deuterated solvents. High-resolution mass spectra (HRMS) were performed with electrospray spectrometer Waters Micromass Q-TOF Premier Mass Spectrometer. The intensity data were collected on an a Rigaku 002 Saturn 944 diffractometer using graphite-monochromated Cu K $\alpha$  ( $\lambda = 1.54184 \text{ \AA}$ ) radiation. Unless otherwise noted, all reagents and reaction solvents were purchased from commercial sources, and used without further purification.

1,1-Diphenylprop-2-yn-1-ol (**5a**)<sup>11</sup>, 1-([1,1'-Biphenyl]-4-yl)-1-phenylprop-2-yn-1-ol (**5b**)<sup>12</sup>, 1,1-Bis(4-methoxyphenyl)prop-2-yn-1-ol (**5c**)<sup>13</sup>, methyl 2-(4,4,5,5-tetramethyl-1,3,2-dioxaborolan-2-yl)benzoate(**1a**)<sup>15</sup> were prepared according to the procedures in literatures.

## 2. Synthesis

B<sub>2</sub>Pin<sub>2</sub> (2.2 g, 8.6 mmol), methyl 2-bromobenzoate (5.4 mmol), sodium carbonate (3.5 g, 25.7 mmol) and Pd(PPh<sub>3</sub>)<sub>2</sub>Cl<sub>2</sub> (360 mg, 0.44 mmol) were added to a 100 mL round-bottom flask, placed under nitrogen, dissolved in 1,4-dioxane (40 mL), and stirred for 12 h at 80 °C. After completion as determined by TLC analysis, the reaction mixture was extracted with EA (3 × 20 mL) and the combined organic layers were washed with brine (30 mL). The solution was then dried (MgSO<sub>4</sub>), filtered, and concentrated. The crude product was purified by flash column chromatography (PE : EA = 20 : 1) to give methyl 2-(4,4,5,5-tetramethyl-1,3,2-dioxaborolan-2-yl) benzoate derivatives (**1b-1d**).

### Methyl 4-fluoro-2-(4,4,5,5-tetramethyl-1,3,2-dioxaborolan-2-yl)benzoate (**1b**)

Colorless oil, 1.4 g, 92% yield. <sup>1</sup>H NMR (400 MHz, CDCl<sub>3</sub>) δ (ppm) 7.96-7.94 (m, 1H), 7.15-7.13 (m, 1H), 7.07 (d, *J* = 8.0 Hz, 1H), 3.90 (s, 3H), 1.41 (s, 12H). <sup>13</sup>C NMR (101 MHz, CDCl<sub>3</sub>) δ (ppm) 167.50, 165.16 (d, *J* = 254.9 Hz), 131.55 (d, *J* = 8.9 Hz), 129.44 (d, *J* = 2.8 Hz), 119.06 (d, *J* = 20.9 Hz), 115.98 (d, *J* = 21.9 Hz), 84.32, 52.41, 24.83.

### Methyl 4-methyl-2-(4,4,5,5-tetramethyl-1,3,2-dioxaborolan-2-yl)benzoate (**1c**)<sup>14</sup>

Colorless oil, 462 mg, 31% yield. <sup>1</sup>H NMR (400 MHz, CDCl<sub>3</sub>): δ (ppm) 7.75 (d, *J* = 7.1 Hz, 1H), 7.27 (s, 1H), 7.25-7.23 (m, 1H), 3.87 (s, 3H), 2.42 (s, 3H), 1.43 (s, 12H). <sup>13</sup>C NMR (101 MHz, CDCl<sub>3</sub>): δ (ppm) 168.76, 141.34, 133.50, 133.22, 128.55, 125.98, 83.87, 52.23, 25.37, 21.53.

### Methyl 5-methoxy-2-(4,4,5,5-tetramethyl-1,3,2-dioxaborolan-2-yl)benzoate (**1d**)<sup>15</sup>

Colorless oil, 426 mg, 27% yield. <sup>1</sup>H NMR (400 MHz, CDCl<sub>3</sub>): δ (ppm) 7.45-7.41 (m, 2H), 7.05-7.02 (m, 1H), 3.88 (s, 3H), 3.81 (s, 3H), 1.38 (s, 12H). <sup>13</sup>C NMR (101 MHz, CDCl<sub>3</sub>): δ (ppm) 168.35, 160.34, 135.60, 133.89, 117.94, 113.71, 83.83, 55.31, 52.29, 24.84.

4-Bromo-L-Naphthol (1.8 g, 7.8 mmol), methyl 2-(4,4,5,5-tetramethyl-1,3,2-dioxaborolan-2-yl)benzoate derivatives (**1a-1d**) (8.6 mmol), potassium carbonate (6.6 g, 48 mmol) and Pd(PPh<sub>3</sub>)<sub>4</sub> (1.1 g, 1mmol) were added to a 250 mL round-bottom flask, placed under nitrogen, dissolved in THF/H<sub>2</sub>O (20 mL/10 mL), and stirred for 12 h at 80 °C. After completion as determined by TLC analysis, the reaction mixture was extracted with EA (3 × 20 mL) and the combined organic layers were washed with brine (30 mL). The solution was then dried (MgSO<sub>4</sub>), filtered, and concentrated. The crude product was purified by flash column chromatography (PE : EA = 100 : 1) to give methyl 2-(4-hydroxy naphthalen-1-yl) benzoate derivatives (**2a-2d**).

### methyl 2-(4-hydroxynaphthalen-1-yl)benzoate (**2a**)

Light pink solid, 430 mg, 19%. m.p. 58.5-60.9 °C. <sup>1</sup>H NMR (400 MHz, CDCl<sub>3</sub>): δ

8.11 (d,  $J = 8.0$  Hz, 1H), 7.89 (d,  $J = 9.2$  Hz, 1H), 7.46 (t,  $J = 7.6$  Hz, 1H), 7.38-7.22 (m, 5H), 7.00 (d,  $J = 7.6$  Hz, 1H), 6.66 (s, 1H), 6.47 (d,  $J = 7.6$  Hz, 1H), 3.36 (s, 3H);  $^{13}\text{C}$  NMR (101 MHz,  $\text{CDCl}_3$ ):  $\delta$  168.99, 151.47, 141.51, 132.88, 132.34, 131.63, 131.21, 129.77, 127.19, 126.29, 126.20, 125.10, 124.65, 124.32, 122.09, 108.03, 52.09. HRMS-ESI calcd for  $\text{C}_{18}\text{H}_{14}\text{O}_3$   $[\text{M}+\text{H}]^+$  279.10212; found 279.10145

#### **Methyl 4-fluoro-2-(4-hydroxynaphthalen-1-yl)benzoate (2b)**

Light pink solid, 383 mg, 15% yield. m.p. 141.0-142.5 °C.  $^1\text{H}$  NMR (400 MHz,  $\text{CDCl}_3$ ):  $\delta$  (ppm) 8.21 (d,  $J = 8.0$  Hz, 1H), 8.06-8.04 (m, 1H), 7.48-7.36 (m, 3H), 7.22-7.15 (m, 1H), 7.12 (d,  $J = 8.0$  Hz, 2H), 6.64 (d,  $J = 8.0$  Hz, 1H), 5.99 (s, 1H), 3.48 (s, 3H).  $^{13}\text{C}$  NMR (101 MHz,  $\text{CDCl}_3$ ):  $\delta$  (ppm) 167.57, 164.51 (d,  $J = 254.2$  Hz), 151.57, 144.91 (d,  $J = 8.8$  Hz), 132.70 (d,  $J = 8.8$  Hz), 130.65, 127.90 (d,  $J = 3.0$  Hz), 126.67, 126.00, 125.10, 125.06, 124.24, 122.11, 119.38 (d,  $J = 21.4$  Hz), 114.55 (d,  $J = 21.3$  Hz), HRMS-ESI calcd for  $\text{C}_{18}\text{H}_{13}\text{FO}_3$   $[\text{M}+\text{H}]^+$  297.0927; found 297.0922.

#### **Methyl 2-(4-hydroxynaphthalen-1-yl)-4-methylbenzoate (2c)**

White solid, 366 mg, 16% yield. m.p. 162.5-163.9 °C.  $^1\text{H}$  NMR (400 MHz,  $\text{CDCl}_3$ ):  $\delta$  (ppm) 8.20 (d,  $J = 8.0$  Hz, 1H), 7.95 (d,  $J = 8.0$  Hz, 1H), 7.50-7.34 (m, 3H), 7.31 (d,  $J = 8.0$  Hz, 1H), 7.22 (s, 1H), 7.12 (d,  $J = 7.6$  Hz, 1H), 6.59 (d,  $J = 7.6$  Hz, 1H), 6.25 (s, 1H), 3.51 (s, 3H), 2.45 (s, 3H).  $^{13}\text{C}$  NMR (101 MHz,  $\text{CDCl}_3$ ):  $\delta$  (ppm) 168.69, 151.27, 142.38, 141.85, 133.21, 133.04, 131.79, 130.17, 128.65, 128.05, 126.31, 126.01, 125.29, 124.71, 124.30, 122.08, 108.17, 52.02, 21.52. HRMS-ESI calcd for  $\text{C}_{19}\text{H}_{16}\text{O}_3$   $[\text{M}+\text{H}]^+$  293.1178; found 293.1172.

#### **Methyl 2-(4-hydroxynaphthalen-1-yl)-5-methoxybenzoate (2d)**

Yellow solid, 531 mg, 20% yield. m.p. 173.5-174.9 °C.  $^1\text{H}$  NMR (400 MHz,  $\text{CDCl}_3$ ):  $\delta$  (ppm) 8.21 (d,  $J = 8.0$  Hz, 1H), 7.52 (m, 1H), 7.49-7.41 (m, 2H), 7.40-7.35 (m, 1H), 7.30 (d,  $J = 8.0$  Hz, 1H), 7.17-7.09 (m, 2H), 6.71 (d,  $J = 8.0$  Hz, 1H), 3.92 (s, 3H), 3.43 (s, 3H).  $^{13}\text{C}$  NMR (101 MHz,  $\text{CDCl}_3$ ):  $\delta$  (ppm) 168.35, 158.63, 150.93, 133.72, 133.45, 133.39, 132.59, 131.72, 126.37, 126.23, 125.46, 124.83, 124.21, 121.88, 117.91, 114.49, 108.05, 55.61, 52.03. HRMS-ESI calcd for  $\text{C}_{19}\text{H}_{16}\text{O}_4$   $[\text{M}+\text{H}]^+$  309.1127; found 309.1126.

Methyl 2-(4-hydroxynaphthalen-1-yl)benzoate derivatives (**2a-2d**) (3.4 mmol) was added to a 250 mL round-bottom flask, placed under nitrogen, dissolved in anhydrous THF (50 ml). To this solution methylmagnesium bromide (20.3 mmol, 3M, THF) was added dropwise over ~10 min and the mixture was heated at 40 °C for 3 h. After completion as determined by TLC analysis, the reaction mixture was cooled to 0 °C and brine (20 mL) were cautiously added. Then the reaction mixture was extracted with EA (3 × 20 mL) and the combined organic layers were washed with brine (30 mL). The solution was then dried ( $\text{MgSO}_4$ ), filtered, and concentrated. The crude product was purified by flash column chromatography (PE : EA = 100 : 1) to give 4-(2-(2-hydroxypropan-2-yl)phenyl)naphthalen-1-ol derivatives (**3a-3d**).

#### **4-(2-(2-hydroxypropan-2-yl)phenyl)naphthalen-1-ol (3a)**

Pink solid, 230 mg, 76%. m.p. 173.7-175.0 °C. <sup>1</sup>H NMR (400 MHz, CDCl<sub>3</sub>): δ 8.17 (d, *J* = 8.4 Hz, 1H), 7.62 (d, *J* = 8.0 Hz, 1H), 7.41-7.19 (m, 6H), 7.15 (d, *J* = 7.6 Hz, 1H), 6.62 (d, *J* = 7.6 Hz, 1H), 6.09 (s, 1H), 1.36 (s, 3H), 1.34 (s, 3H); <sup>13</sup>C NMR (101 MHz, CDCl<sub>3</sub>): δ 151.46, 147.27, 137.36, 134.09, 133.37, 132.84, 127.65, 127.12, 126.87, 126.59, 126.27, 126.18, 125.21, 124.53, 121.89, 107.57, 74.64, 32.34, 32.09. HRMS-ESI calcd for C<sub>19</sub>H<sub>18</sub>O<sub>2</sub> [M-H]<sup>-</sup> 277.12285; found 277.12320.

#### 4-(5-Fluoro-2-(2-hydroxypropan-2-yl)phenyl)naphthalen-1-ol (3b)

White solid, 772 mg, 77% yield. m.p. 135.6-137.1 °C. <sup>1</sup>H NMR (400 MHz, CDCl<sub>3</sub>): δ (ppm) 8.23 (d, *J* = 8.0 Hz, 1H), 7.68-7.66 (m, 1H), 7.45-7.43 (m, 2H), 7.34 (d, *J* = 8.0 Hz, 1H), 7.19 (d, *J* = 8.0 Hz, 1H), 7.14-7.08 (m, 1H), 6.83-6.82 (m, 1H), 6.62 (d, *J* = 8.0 Hz, 1H), 6.54 (s, 1H), 1.44-1.41 (m, 3H), 1.39-1.36 (m, 3H). <sup>13</sup>C NMR (101 MHz, CDCl<sub>3</sub>): δ (ppm) 160.84 (d, *J* = 247.2 Hz), 151.90, 143.30 (d, *J* = 8.4 Hz), 139.86, 139.79, 133.74, 131.39, 128.15 (d, *J* = 8.0 Hz), 127.22, 126.96, 126.65, 125.32, 124.57, 122.09, 119.89 (d, *J* = 20.3 Hz), 114.48 (d, *J* = 20.1 Hz), 107.46, 74.49, 32.42, 32.04. HRMS-ESI calcd for C<sub>19</sub>H<sub>17</sub>FO<sub>2</sub> [M+H]<sup>+</sup> 295.1134; found 295.1144.

#### 4-(2-(2-Hydroxypropan-2-yl)-5-methylphenyl)naphthalen-1-ol (3c)

White solid, 638 mg, 64% yield. m.p. 117.8-118.9 °C. <sup>1</sup>H NMR (400 MHz, DMSO-*d*<sub>6</sub>): δ (ppm) 10.16 (s, 1H), 8.18 (d, *J* = 8.0 Hz, 1H), 7.84 (d, *J* = 8.0 Hz, 1H), 7.38-7.36 (m, 2H), 7.18 (d, *J* = 8.0 Hz, 2H), 7.11 (d, *J* = 7.5 Hz, 1H), 6.90 (d, *J* = 7.5 Hz, 1H), 6.77 (s, 1H), 4.78 (s, 1H), 2.26 (s, 3H), 1.23 (s, 3H), 1.19 (s, 3H). <sup>13</sup>C NMR (101 MHz, DMSO-*d*<sub>6</sub>): δ (ppm) 152.83, 146.55, 137.52, 134.87, 134.33, 133.41, 132.00, 128.16, 127.95, 126.99, 126.23, 124.72, 124.63, 122.45, 107.30, 71.96, 33.41, 31.35, 20.68. HRMS-ESI calcd for C<sub>20</sub>H<sub>20</sub>O<sub>2</sub> [M+H]<sup>+</sup> 293.1542; found 293.1538.

#### 4-(2-(2-Hydroxypropan-2-yl)-4-methoxyphenyl)naphthalen-1-ol (3d)

White solid, 838 mg, 80% yield. m.p. 173.5-174.9 °C. <sup>1</sup>H NMR (400 MHz, DMSO-*d*<sub>6</sub>): δ (ppm) 10.16 (s, 1H), 8.17 (d, *J* = 8.0 Hz, 1H), 7.54 (s, 1H), 7.38-7.36 (m, 2H), 7.16-7.14 (m, 2H), 6.95-6.76 (m, 3H), 4.90 (s, 1H), 3.82 (s, 3H), 1.26 (s, 3H), 1.21 (s, 3H). <sup>13</sup>C NMR (101 MHz, DMSO-*d*<sub>6</sub>): δ (ppm) 158.70, 152.86, 151.08, 134.76, 134.05, 131.55, 129.86, 128.53, 126.96, 126.19, 124.79, 124.62, 122.46, 112.69, 111.19, 107.33, 72.01, 55.36, 33.15, 30.94.

4-(2-(2-hydroxypropan-2-yl)phenyl)naphthalen-1-ol derivatives (**3a-3d**) (3.4 mmol) was added to a 250 mL round-bottom flask, dissolved in xylene (100ml). To this solution *p*-toluenesulfonic acid (70 mg, 0.4 mmol) was added and the mixture was heated to reflux at 150 °C for 3 h. After completion as determined by TLC analysis, the reaction mixture was extracted with EA (3 × 20 mL) and the combined organic layers were washed with brine (30 mL). The solution was then dried (MgSO<sub>4</sub>), filtered, and concentrated. The crude product was purified by flash column chromatography (PE : EA = 100 : 1) to give 7,7-dimethyl-7H-benzo[*c*]fluoren-5-ol derivatives (**4a-4d**).

#### 7,7-Dimethyl-7H-benzo[*c*]fluoren-5-ol (4a)

White solid, 752 mg, 96% yield. m.p. 174.6-176.3 °C. <sup>1</sup>H NMR (400 MHz, CDCl<sub>3</sub>): δ (ppm) 8.71 (d, *J*=10.0 Hz, 1H), 8.29 (d, *J*=10.0 Hz, 1H), 8.23 (d, *J*=10.0 Hz, 1H), 7.69-7.65 (m, 1H), 7.54-7.51 (m, 2H), 7.44-7.40 (m, 1H), 7.31 (d, *J*=10.0 Hz, 1H), 6.97 (s, 1H), 5.32 (s, 1H), 1.51 (s, 6H). <sup>13</sup>C NMR (101 MHz, DMSO-*d*<sub>6</sub>) δ (ppm) 154.32, 154.04, 153.87, 140.43, 130.38, 127.79, 127.59, 125.32, 124.90, 124.39, 123.96, 123.94, 123.79, 122.77, 121.80, 103.90, 46.76, 27.12. HRMS-ESI calcd for C<sub>41</sub>H<sub>32</sub>O<sub>2</sub> [M + H]<sup>+</sup> 261.1274; found 261.1277.

#### 10-Fluoro-7,7-dimethyl-7H-benzo[*c*]fluoren-5-ol (4b)

White solid, 572 mg, 61% yield. m.p. 125.3-126.8 °C. <sup>1</sup>H NMR (400 MHz, CDCl<sub>3</sub>): δ (ppm) 8.49 (d, *J* = 8.0 Hz, 1H), 8.26 (d, *J* = 8.0 Hz, 1H), 7.82 (d, *J* = 8.0 Hz, 1H), 7.59 (t, *J* = 8.0 Hz, 1H), 7.46 (t, *J* = 8.0 Hz, 1H), 7.30-7.28 (m, 1H), 6.90 (t, *J* = 8.0 Hz, 1H), 6.81 (s, 1H), 5.94 (s, 1H), 1.35 (s, 6H). <sup>13</sup>C NMR (101 MHz, CDCl<sub>3</sub>): δ (ppm) 162.60 (d, *J* = 241.0 Hz), 154.48, 152.32, 149.28, 142.11 (d, *J* = 8.6 Hz), 130.42, 127.67, 125.42 (d, *J* = 2.9 Hz), 124.70, 124.27, 123.50, 123.08, 122.86 (d, *J* = 9.4 Hz), 111.55 (d, *J* = 22.3 Hz), 109.23 (d, *J* = 24.6 Hz), 104.20, 46.40, 26.80.

#### 7,7,10-Trimethyl-7H-benzo[*c*]fluoren-5-ol (4c)

White solid, 559 mg, 60% yield. m.p. 168.8-170.1 °C. <sup>1</sup>H NMR (400 MHz, CDCl<sub>3</sub>): δ (ppm) 8.74 (d, *J* = 8.0 Hz, 1H), 8.30 (d, *J* = 8.0 Hz, 1H), 8.07 (s, 1H), 7.68 (t, *J* = 8.0 Hz, 1H), 7.54 (s, 1H), 7.39 (d, *J* = 8.0 Hz, 1H), 7.14 (s, 1H), 6.94 (s, 1H), 5.30 (s, 1H), 2.54 (s, 3H), 1.49 (s, 6H). <sup>13</sup>C NMR (101 MHz, DMSO-*d*<sub>6</sub>) δ (ppm) 154.33, 154.16, 151.05, 140.60, 136.57, 130.36, 127.71, 125.99, 124.82, 124.34, 124.04, 123.98, 123.73, 122.53, 122.40, 103.92, 46.38, 27.22, 21.87. HRMS-ESI calcd for C<sub>20</sub>H<sub>18</sub>O [M+H]<sup>+</sup> 274.1358; found 274.1360.

#### 9-Methoxy-7,7-dimethyl-7H-benzo[*c*]fluoren-5-ol (4d)

White solid, 473 mg, 48% yield. m.p. 173.5-174.9 °C. <sup>1</sup>H NMR (400 MHz, DMSO-*d*<sub>6</sub>) δ (ppm) 10.29 (s, 1H), 8.59 (d, *J* = 8.0 Hz, 1H), 8.26 (d, *J* = 8.0 Hz, 1H), 8.10 (d, *J* = 8.0 Hz, 1H), 7.63 (t, *J* = 8.0 Hz, 1H), 7.48 (t, *J* = 8.0 Hz, 1H), 7.19 (s, 1H), 7.04 (s, 1H), 6.92 (d, *J* = 8.0 Hz, 1H), 3.82 (s, 3H), 1.44 (s, 6H). <sup>13</sup>C NMR (101 MHz, DMSO-*d*<sub>6</sub>) δ (ppm) 157.48, 155.47, 152.80, 152.51, 132.68, 129.25, 126.99, 124.25, 123.75, 123.61, 123.41, 123.18, 121.85, 112.05, 108.97, 103.52, 55.22, 46.28, 26.75. HRMS-ESI calcd for C<sub>20</sub>H<sub>18</sub>O<sub>2</sub> [M+H]<sup>+</sup> 290.1307; found 290.1309.

7,7-Dimethyl-7H-benzo[*c*]fluoren-5-ol derivatives (**4a-4d**) (0.72 mmol), alkynol (**5a-5c**) (0.9 mmol) were added to a 100 mL round-bottom flask, dissolved in toluene (20 mL), followed by dodecylbenzenesulphonic acid (1~2 drop) and the resulting mixture was stirred for 3 h at 40 °C. After completion as determined by TLC analysis, the reaction mixture was extracted with EA (3×20 mL) and the combined organic layers were washed with brine (30 mL). The solution was then dried (MgSO<sub>4</sub>), filtered, and concentrated. The crude product was purified by flash column chromatography (PE: EA=100:1) to give **5NP**, respectively.

#### 13,13-Dimethyl-3,3-diphenyl-3,13-dihydrobenzo-indeno[2,1-*f*]chromene (5NP-a)

Brown solid, 1.18 g, 77% yield. m.p. 214.3-216.2 °C. <sup>1</sup>H NMR (400 MHz, CDCl<sub>3</sub>): δ (ppm) 8.63 (d, *J* = 10.0 Hz, 1H), 8.47 (d, *J* = 10.0 Hz, 1H), 8.18 (d, *J* = 10.0 Hz, 1H), 7.60-7.25 (m, 15H), 7.22-7.19 (m, 1H), 6.27 (d, *J* = 10.0 Hz, 1H), 1.63 (s, 6H). <sup>13</sup>C NMR (101 MHz, CDCl<sub>3</sub>): δ (ppm) 154.94, 148.33, 147.50, 144.94, 139.89, 130.13, 128.18, 127.89, 127.53, 127.13, 127.00, 126.96, 126.94, 126.89, 125.42, 124.84, 123.72, 123.20, 122.04, 121.85, 121.01, 113.08, 82.48, 47.68, 26.14. HRMS-ESI calcd for C<sub>41</sub>H<sub>32</sub>O<sub>2</sub> [M+H]<sup>+</sup> 451.2056; found 451.2062.

**3,3-Bis(4-methoxyphenyl)-13,13-dimethyl-3,13-dihydrobenzo[*h*]indeno[2,*I*-*f*]chromene (5NP-b)**

Light brown solid, 1.41 g, 81% yield. m.p. 221.5- 223.4 °C. <sup>1</sup>H NMR(400 MHz, CDCl<sub>3</sub>): δ (ppm) 8.64 (d, *J*=10.0 Hz, 1H), 8.45 (d, *J* = 8.4 Hz, 1H), 8.19 (d, *J*=10.0 Hz, 1H), 7.62-7.54 (m, 1H), 7.51-7.42 (m, 6H), 7.39-7.36 (m, 1H), 7.31-7.27 (m, 2H), 6.83 (d, *J* = 10.0 Hz, 4H), 6.21 (d, *J* = 10.0 Hz, 1H), 3.76 (s, 6H), 1.65 (s, 6H). <sup>13</sup>C NMR (101 MHz, CDCl<sub>3</sub>): δ (ppm) 158.90, 154.95, 148.41, 147.53, 139.96, 137.29, 130.10, 128.33, 128.24, 127.08, 127.01, 126.82, 125.39, 124.90, 124.78, 123.72, 123.24, 122.04, 121.86, 120.63, 113.48, 113.12, 82.15, 55.22, 47.69, 26.15. HRMS-ESI calcd for C<sub>41</sub>H<sub>32</sub>O<sub>2</sub> [M+H]<sup>+</sup> 511.2268; found 511.2270.

**3-([1,1'-Biphenyl]-4-yl)-13,13-dimethyl-3-phenyl-3,13-dihydrobenzo[*h*]indeno[2,*I*-*f*]chromene (5NP-c)**

Purple solid, 1.13 g, 63% yield. m.p. 195.3-196.7 °C. <sup>1</sup>H NMR (400 MHz, CDCl<sub>3</sub>): δ (ppm) 8.66 (d, *J* = 10.0 Hz, 1H), 8.52 (d, *J* = 10.0 Hz, 1H), 8.21 (d, *J* = 10.0 Hz, 1H), 7.65-7.28 (m, 20H), 6.32 (d, *J* = 10.0 Hz, 1H), 1.67 (s, 6H). <sup>13</sup>C NMR (101 MHz, CDCl<sub>3</sub>): δ (ppm) 154.98, 148.38, 147.56, 144.93, 144.00, 140.67, 140.42, 139.93, 130.20, 128.77, 128.29, 127.87, 127.64, 127.39, 127.36, 127.23, 127.14, 127.07, 126.99, 126.93, 125.51, 124.95, 124.90, 123.81, 123.26, 122.12, 121.91, 121.13, 113.16, 82.45, 47.74, 26.20. HRMS-ESI calcd for C<sub>41</sub>H<sub>32</sub>O<sub>2</sub> [M+H]<sup>+</sup> 527.2369; found 527.2378.

**10-Fluoro-13,13-dimethyl-3,3-diphenyl-3,13-dihydrobenzo[*h*]indeno[2,*I*-*f*]chromene (5NP-F-a)**

Light pink solid, 213 mg, 63% yield. m.p. 141.0-142.5 °C. <sup>1</sup>H NMR (400 MHz, CDCl<sub>3</sub>): δ (ppm) 8.49-8.40 (m, 2H), 7.79 (d, *J* = 10.0 Hz, 1H), 7.56-7.54 (m, 1H), 7.51-7.43 (m, 5H), 7.33 -7.29 (m, 1H), 7.28-7.26 (m, 3H), 7.25-7.16 (m, 4H), 6.92-6.90 (m, 1H), 6.23 (d, *J* = 10.0 Hz, 1H), 1.58 (s, 6H). <sup>13</sup>C NMR (101 MHz, CDCl<sub>3</sub>): δ (ppm) 162.55 (d, *J* = 240.5 Hz), 150.23, 148.83, 148.58, 144.82, 141.58 (d, *J* = 8.8 Hz), 129.98, 128.20, 128.00, 127.59, 127.44, 126.12 (d, *J* = 3.2 Hz), 125.04, 124.83, 123.29, 122.56 (d, *J* = 9.2 Hz), 120.73, 112.98, 111.88 (d, *J* = 22.7 Hz), 109.33 (d, *J* = 24.6 Hz), 99.88, 82.60, 47.30, 26.14. HRMS-ESI calcd for C<sub>34</sub>H<sub>26</sub>FO [M+H]<sup>+</sup> 469.1968; found 469.1960.

**10-Fluoro-3,3-bis(4-methoxyphenyl)-13,13-dimethyl-3,13-dihydrobenzo[*h*]indeno[2,*I*-*f*]chromene(5NP-F-b)**



Light yellow solid, 248 mg, 65% yield. m.p. 216.9- 218.0 °C. <sup>1</sup>H NMR (400 MHz, CDCl<sub>3</sub>): δ (ppm) 8.33-8.31 (m, 2H), 7.69 (d, *J* = 10.0 Hz, 1H), 7.43-1.41 (m, 1H), 7.36-7.30 (m, 1H), 7.29- 7.24 (m, 4H), 7.19-7.17 (m, 1H), 7.11-7.07 (m, 1H), 6.84-6.75 (m, 1H), 6.68-6.67 (m, 4H), 6.05 (d, *J* = 10.0 Hz, 1H), 3.58 (s, 6H), 1.47 (s, 6H). <sup>13</sup>C NMR (101 MHz, CDCl<sub>3</sub>): δ (ppm) 162.52 (d, *J* = 240.9 Hz), 158.95, 150.25, 148.93, 148.62, 141.61 (d, *J* = 8.8 Hz), 137.16, 129.96, 128.56, 128.34, 127.40, 125.94 (d, *J* = 3.0 Hz), 125.09, 124.99, 123.44, 123.39, 122.54 (d, *J* = 9.4 Hz), 120.35, 113.51, 113.04, 111.81 (d, *J* = 22.6 Hz), 109.28 (d, *J* = 24.4 Hz), 82.28, 55.22, 47.31, 26.15. HRMS-ESI calcd for C<sub>36</sub>H<sub>29</sub>FO<sub>3</sub> [M+H]<sup>+</sup> 529.2179; found 529.2174.

**3-([1,1'-Biphenyl]-4-yl)-10-fluoro-13,13-dimethyl-3-phenyl-3,13-dihydrobenzo[*h*]indeno[2,1-*f*]chromene (5NP-F-c)**

Light pink solid, 102 mg, 26% yield. m.p. 216.9-218.0 °C. <sup>1</sup>H NMR (400 MHz, CDCl<sub>3</sub>): δ (ppm) 8.46-8.44 (m, 2H), 7.79-7.77 (m, 1H), 7.50-7.46 (m, 10H), 7.28-7.24 (m, 8H), 6.90-6.88 (m, 1H), 6.24 (d, *J* = 10.0 Hz, 1H), 1.56 (s, 6H). <sup>13</sup>C NMR (101 MHz, CDCl<sub>3</sub>): δ (ppm) 162.55 (d, *J* = 245.1 Hz), 150.28, 148.87, 148.62, 144.80, 143.85, 141.55 (d, *J* = 8.8 Hz), 140.71, 140.57, 130.02, 128.76, 128.30, 127.97, 127.68, 127.51, 127.36, 127.11, 126.99, 126.89, 126.17 (d, *J* = 3.1 Hz), 125.12, 124.87, 123.34, 122.57 (d, *J* = 9.4 Hz), 120.84, 113.05, 111.90 (d, *J* = 22.8 Hz), 109.34 (d, *J* = 24.6 Hz), 82.55, 47.34, 26.18. HRMS-ESI calcd for C<sub>40</sub>H<sub>29</sub>FO [M+H]<sup>+</sup> 545.2281; found 545.2273.

**10,13,13-Trimethyl-3,3-diphenyl-3,13-dihydrobenzo[*h*]indeno[2,1-*f*]chromene (5NP-Me-a)**

Yellow oil, 161 mg, 48% yield. <sup>1</sup>H NMR (400 MHz, CDCl<sub>3</sub>): δ (ppm) 8.66 (d, *J* = 8.4 Hz, 1H), 8.48 (d, *J* = 8.0 Hz, 1H), 8.01 (s, 1H), 7.61-7.46 (m, 6H), 7.34-7.31 (m, 6H), 7.23 (t, *J* = 8.0 Hz, 2H), 7.11 (d, *J* = 8.0 Hz, 1H), 6.27 (d, *J* = 8.0 Hz, 1H), 2.49 (s, 3H), 1.63 (s, 6H). <sup>13</sup>C NMR (101 MHz, CDCl<sub>3</sub>): δ (ppm) 152.20, 148.20, 147.85, 144.98, 140.04, 136.44, 130.14, 128.18, 127.80, 127.52, 127.05, 126.95, 126.89, 126.19, 124.78, 123.78, 123.17, 122.87, 121.50, 121.02, 113.09, 82.43, 47.33, 26.25, 21.89. HRMS-ESI calcd for C<sub>35</sub>H<sub>28</sub>O [M+H]<sup>+</sup> 465.2218; found 465.2219.

**3,3-Bis(4-methoxyphenyl)-10,13,13-trimethyl-3,13-dihydrobenzo[*h*]indeno[2,1-*f*]chromene (5NP-Me-b)**

Yellow solid, 170 mg, 45% yield. m.p. 134.8-135.2 °C. <sup>1</sup>H NMR (400 MHz, CDCl<sub>3</sub>): δ (ppm) 8.65 (d, *J* = 8.0 Hz, 1H), 8.44 (d, *J* = 8.0 Hz, 1H), 8.01 (s, 1H), 7.61-7.54 (m, 1H), 7.51-7.39 (m, 5H), 7.33 (d, *J* = 7.6 Hz, 1H), 7.27 (d, *J* = 10.0 Hz, 1H), 7.10 (d, *J* = 8.0 Hz, 1H), 6.85-6.80 (m, 4H), 6.20 (d, *J* = 8.0 Hz, 1H), 3.75 (s, 6H), 2.49 (s, 3H), 1.63 (s, 6H). <sup>13</sup>C NMR (101 MHz, CDCl<sub>3</sub>): δ (ppm) 158.86, 152.21, 148.32, 147.87, 140.13, 137.32, 136.42, 130.10, 128.24, 128.21, 126.98, 126.78, 126.13, 124.83, 124.70, 123.76, 123.20, 122.85, 121.49, 120.62, 113.45, 113.12, 82.10, 55.22, 47.33, 26.25, 21.89. HRMS-ESI calcd for C<sub>37</sub>H<sub>32</sub>O<sub>3</sub> [M+H]<sup>+</sup> 525.2430; found 525.2431.

**3-([1,1'-Biphenyl]-4-yl)-10,13,13-trimethyl-3-phenyl-3,13-dihydrobenzo[*h*]indeno[2,1-*f*]chromene (5NP-Me-c)**

Yellow solid, 222 mg, 57% yield. m.p. 207.3-209.3 °C. <sup>1</sup>H NMR (400 MHz, CDCl<sub>3</sub>): δ (ppm) 8.70 (d, *J* = 8.4 Hz, 1H), 8.54 (d, *J* = 8.4 Hz, 1H), 8.05 (s, 1H), 7.62 (m, 5H), 7.54 (m, 5H), 7.45-7.32 (m, 7H), 7.31-7.27 (m, 1H), 7.15-7.13 (m, 1H), 6.33 (d, *J* = 8.4 Hz, 1H), 2.52 (s, 3H), 1.66 (s, 6H). <sup>13</sup>C NMR (101 MHz, CDCl<sub>3</sub>): δ (ppm) 152.24, 148.23, 147.89, 144.95, 144.02, 140.66, 140.38, 140.09, 136.47, 130.19, 128.74, 128.26, 127.76, 127.60, 127.37, 127.33, 127.12, 127.04, 126.96, 126.91, 126.24, 124.86, 124.82, 123.84, 123.21, 122.91, 121.53, 121.11, 113.14, 82.40, 47.37, 26.29, 21.91. HRMS-ESI calcd for C<sub>41</sub>H<sub>32</sub>O [M+H]<sup>+</sup> 541.2531; found 541.2532.

### **11-Methoxy-13,13-dimethyl-3,3-diphenyl-3,13-dihydrobenzo[*h*]indeno[2,*I*-*f*]chromene (5NP-OMe-a)**

Yellow oil, 169 mg, 49% yield. <sup>1</sup>H NMR (400 MHz, CDCl<sub>3</sub>) δ (ppm) 8.53 (d, *J* = 8.4 Hz, 1H), 8.45-8.43 (m, 1H), 8.04 (d, *J* = 8.4 Hz, 1H), 7.54-7.48 (m, 5H), 7.45-7.43 (m, 1H), 7.29-7.26 (m, 2H), 7.24 (s, 1H), 7.21-7.16 (m, 2H), 6.97 (d, *J* = 10.0 Hz, 1H), 6.88-6.86 (m, 1H), 6.23 (d, *J* = 10.0 Hz, 1H), 3.84 (s, 3H), 1.59 (s, 6H). <sup>13</sup>C NMR (101 MHz, CDCl<sub>3</sub>) δ (ppm) 158.14, 157.03, 147.51, 146.57, 145.02, 132.91, 129.58, 128.18, 127.99, 127.52, 127.03, 126.92, 126.90, 126.85, 124.79, 123.70, 123.18, 122.65, 121.07, 113.21, 111.91, 108.47, 82.36, 55.52, 47.67, 26.37. HRMS-ESI calcd for C<sub>35</sub>H<sub>28</sub>O<sub>2</sub> [M+H]<sup>+</sup> 480.2168; found 480.2175.

### **11-Methoxy-3,3-bis(4-methoxyphenyl)-13,13-dimethyl-3,13-dihydrobenzo[*h*]indeno[2,*I*-*f*]chromene (5NP-OMe-b)**

Pink solid, 183 mg, 47% yield. m.p. 217.0-218.8 °C. <sup>1</sup>H NMR (400 MHz, CDCl<sub>3</sub>): δ (ppm) 8.58 (d, *J* = 8.4 Hz, 1H), 8.44 (d, *J* = 8.4 Hz, 1H), 8.09 (d, *J* = 8.4 Hz, 1H), 7.59-7.53 (m, 1H), 7.51-7.41 (m, 5H), 7.27 (d, *J* = 10.0 Hz, 1H), 7.03-7.01 (m, 1H), 6.93-6.91 (m, 1H), 6.87-6.80 (m, 4H), 6.22 (d, *J* = 10.0 Hz, 1H), 3.90 (s, 3H), 3.76 (s, 6H), 1.64 (s, 6H). <sup>13</sup>C NMR (101 MHz, CDCl<sub>3</sub>) δ (ppm) 158.86, 158.10, 157.02, 147.51, 146.57, 137.34, 132.96, 129.53, 128.37, 128.22, 126.85, 126.82, 124.81, 124.68, 123.65, 123.18, 122.59, 120.65, 113.45, 113.20, 111.88, 108.44, 82.00, 55.51, 55.21, 47.65, 26.35. HRMS-ESI calcd for C<sub>37</sub>H<sub>32</sub>O<sub>4</sub> [M+H]<sup>+</sup> 541.2379; found 541.2436.

### **3-([1,1'-Biphenyl]-4-yl)-11-methoxy-13,13-dimethyl-3-phenyl-3,13-dihydrobenzo[*h*]indeno[2,*I*-*f*]chromene (5NP-OMe-c)**

Brown solid, 144 mg, 36% yield. m.p. 149.0-150.5 °C. <sup>1</sup>H NMR (400 MHz, CDCl<sub>3</sub>): δ (ppm) 8.59 (d, *J* = 8.0 Hz, 1H), 8.50 (d, *J* = 8.0 Hz, 1H), 8.09 (d, *J* = 8.0 Hz, 1H), 7.55 (m, 11H), 7.40 (t, *J* = 8.0 Hz, 2H), 7.35-7.33 (m, 4H), 7.02-7.00 (m, 1H), 6.93-6.91 (m, 1H), 6.32 (d, *J* = 8.0 Hz, 1H), 3.90 (s, 3H), 1.65 (s, 6H). <sup>13</sup>C NMR (101 MHz, CDCl<sub>3</sub>): δ (ppm) 158.12, 157.02, 147.48, 146.56, 144.94, 144.01, 140.66, 140.34, 132.88, 129.57, 128.72, 128.23, 127.89, 127.56, 127.34, 127.30, 127.10, 127.06, 126.93, 126.88, 124.81, 124.77, 123.70, 123.17, 122.64, 121.13, 113.20, 111.90, 108.44, 82.26, 55.52, 47.67, 26.37. HRMS-ESI calcd for C<sub>41</sub>H<sub>32</sub>O<sub>2</sub> [M+H]<sup>+</sup> 557.2481; found 557.2472.

3-Bromo-7,7-dimethyl-7H-benzo[de]anthracene (**6**)<sup>16</sup> (6.0 g, 18.6 mmol), Cs<sub>2</sub>CO<sub>3</sub> (12.2 g, 37.2 mmol) and Pd<sub>2</sub>(dba)<sub>3</sub> (1.5 g, 1.86 mmol), <sup>t</sup>BuXPhos (791 mg, 1.86 mmol)

were added to a 250 mL round-bottom flask, placed under nitrogen, dissolved in MeOH/toluene(70 mL/70 mL), and stirred for 12 h at 80 °C. After completion as determined by TLC analysis, the reaction mixture was extracted with EA (3×20 mL) and the combined organic layers were washed with brine (30 mL). The solution was then dried (MgSO<sub>4</sub>), filtered, and concentrated. The crude product was purified by flash column chromatography (PE : EA = 100 : 1) to give 3-methoxy-7,7-dimethyl-7*H*-benzo[*de*]anthracene (**7**). White solid, 3.6 g, 71% yield. m.p. 137.5-139.2 °C. <sup>1</sup>H NMR (400 MHz, CDCl<sub>3</sub>) δ (ppm) 8.21-8.18 (m, 1H), 8.08-8.05 (m, 2H), 7.71 (d, *J*=10.0 Hz, 1H), 7.68-7.65 (m, 1H), 7.58-7.55 (m, 1H), 7.35-7.29 (m, 2H), 6.92 (d, *J*=10.0 Hz, 1H), 4.07 (s, 3H), 1.75 (s, 6H). <sup>13</sup>C NMR (101 MHz, CDCl<sub>3</sub>) δ (ppm) 155.24, 143.15, 142.81, 130.91, 127.67, 126.99, 126.91, 126.40, 125.67, 125.36, 123.87, 122.45, 122.27, 119.72, 119.06, 104.00, 55.59, 38.77, 34.91. HRMS-ESI calcd for C<sub>20</sub>H<sub>18</sub>O [M+H]<sup>+</sup> 275.1430; found 275.1431.

3-Methoxy-7,7-dimethyl-7*H*-benzo[*de*]anthracene (**7**) (3.0 mmol) was added to a 50 mL round-bottom flask, placed under nitrogen, dissolved in DCM (10ml). To this solution BBr<sub>3</sub> (1M, 3.2 mmol) was added and the mixture was cooled at 0 °C for 4 h. After completion as determined by TLC analysis, the reaction mixture was extracted with EA (3×20 mL) and the combined organic layers were washed with brine (30 mL).

The solution was then dried (MgSO<sub>4</sub>), filtered, and concentrated. The crude product was purified by flash column chromatography (PE : EA = 10 : 1) to give 7,7-dimethyl-7*H*-benzo[*de*] anthracen-3-ol (**8**). White solid, 634mg, 81% yield. m.p. 155.7-157.2 °C. <sup>1</sup>H NMR (400 MHz, CDCl<sub>3</sub>) δ (ppm) 7.99 (d, *J*=10.0 Hz, 1H), 7.95-7.91 (m, 1H), 7.85 (d, *J*=10.0 Hz, 1H), 7.59 (d, *J*=10.0 Hz, 1H), 7.55-7.53 (m, 1H), 7.48-7.46 (m, 1H), 7.23-7.20 (m, 2H), 6.77 (d, *J*=10.0 Hz, 1H), 1.62 (s, 6H). <sup>13</sup>C NMR (101 MHz, CDCl<sub>3</sub>) δ (ppm) 151.35, 143.13, 130.92, 127.95, 127.05, 126.93, 126.44, 125.69, 124.22, 123.86, 122.90, 122.27, 119.38, 119.10, 108.91, 38.80, 34.94. HRMS-ESI calcd for C<sub>19</sub>H<sub>16</sub>O [M+H]<sup>+</sup> 261.1274; found 261.1268.

7,7-Dimethyl-7*H*-benzo[*de*]anthracen-3-ol (**8**) (1.0 g, 3.4 mmol), alkynol (**5a-5c**) (3.8 mmol) were added to a 50 mL round-bottom flask, dissolved in toluene (20 ml), followed by dodecylbenzenesulphonic acid (1~2 drop) and the resulting mixture was stirred for 3 h at 40 °C. After completion as determined by TLC analysis, the reaction mixture was extracted with EA (3×20 mL) and the combined organic layers were washed with brine (30 mL). The solution was then dried (MgSO<sub>4</sub>), filtered, and concentrated. The crude product was purified by flash column chromatography (PE : EA = 100 : 1) to give **6NP-a**, **6NP-b**, and **6NP-c**, respectively.

#### **8,8-Dimethyl-3,3-diphenyl-3,8-dihydroanthra[9,*1-gh*]chromene (6NP-a)**

White solid, 343 mg, 76% yield. m.p. 174.9-176.2 °C. <sup>1</sup>H NMR (400 MHz, CDCl<sub>3</sub>) δ (ppm) 8.36 (d, *J*=10.0 Hz, 1H), 8.11-8.00 (m, 1H), 7.87 (s, 1H), 7.75-7.55 (m, 7H), 7.37-7.35 (m, 8H), 6.89 (d, *J*= 10.0 Hz, 1H), 6.32 (d, *J*=10.0 Hz, 1H), 1.77 (s, 6H).

$^{13}\text{C}$  NMR (101 MHz,  $\text{CDCl}_3$ )  $\delta$  (ppm) 147.70, 145.26, 143.31, 143.14, 130.67, 128.25, 127.97, 127.74, 127.59, 127.18, 126.96, 126.47, 126.15, 124.56, 123.99, 123.94, 122.88, 122.36, 119.85, 117.71, 115.36, 83.48, 38.73, 35.00. HRMS-ESI calcd for  $\text{C}_{34}\text{H}_{26}\text{O}$   $[\text{M}+\text{H}]^+$  451.2056; found 451.2060.

### **3,3-Bis(4-methoxyphenyl)-8,8-dimethyl-3,8-dihydroanthra[9,1-*gh*]chromene (6NP-b)**

White solid, 1.42 g, 82% yield. m.p. 206.3-208.1 °C.  $^1\text{H}$  NMR (400 MHz,  $\text{CDCl}_3$ )  $\delta$  (ppm) 8.26 (d,  $J=10.0$  Hz, 1H), 8.09-7.98 (m, 1H), 7.82 (s, 1H), 7.65 (d,  $J=10.0$  Hz, 2H), 7.57-7.54 (m, 1H), 7.47 (d,  $J=10.0$  Hz, 4H), 7.35-7.29 (m, 2H), 6.88 (d,  $J=10.0$  Hz, 4H), 6.82 (d,  $J=10.0$  Hz, 1H), 6.21 (d,  $J=10.0$  Hz, 1H), 3.79 (s, 6H), 1.73 (s, 6H).  $^{13}\text{C}$  NMR (101 MHz,  $\text{CDCl}_3$ )  $\delta$  (ppm) 158.92, 147.70, 143.25, 143.05, 137.59, 130.69, 128.24, 128.10, 127.88, 127.06, 126.90, 126.39, 126.00, 124.53, 123.80, 123.54, 122.65, 122.29, 119.81, 117.66, 115.30, 113.50, 83.09, 55.23, 38.68, 34.93. HRMS-ESI calcd for  $\text{C}_{36}\text{H}_{30}\text{O}$   $[\text{M}+\text{H}]^+$  511.2268; found 511.2275.

### **3-([1,1'-Biphenyl]-4-yl)-8,8-dimethyl-3-phenyl-3,8-dihydroanthra[9,1-*gh*]chromene (6NP-c)**

White solid, 1.49 g, 83% yield. m.p. 144.5-146.0 °C.  $^1\text{H}$  NMR (400 MHz,  $\text{CDCl}_3$ )  $\delta$  (ppm) 8.39-8.29 (m, 1H), 8.05 (s, 1H), 7.85-7.82 (m, 1H), 7.65-7.58 (m, 11H), 7.47-7.30 (m, 8H), 6.90-6.87 (m, 1H), 6.33-6.29 (m, 1H), 1.75 (s, 3H), 1.71 (s, 3H).  $^{13}\text{C}$  NMR (101 MHz,  $\text{CDCl}_3$ )  $\delta$  (ppm) 147.67, 145.17, 144.24, 143.30, 143.15, 140.69, 140.42, 130.64, 128.75, 128.28, 127.97, 127.64, 127.62, 127.37, 127.33, 127.16, 127.12, 126.97, 126.94, 126.44, 126.16, 124.55, 124.05, 123.94, 122.91, 122.35, 119.83, 117.69, 115.35, 83.37, 38.72, 34.99, 34.95. HRMS-ESI calcd for  $\text{C}_{40}\text{H}_{30}\text{O}$   $[\text{M}+\text{H}]^+$  527.2369; found 527.2367.

Dimethyl 2-bromoisophthalate (7.8 mmol), 2-(4-methoxynaphthalen-1-yl)-4,4,5,5-tetramethyl-1,3,2-dioxaborolane (8.6 mmol), potassium carbonate (5.1g, 37.4mmol) and  $\text{Pd}(\text{PPh}_3)_4$  (1.1g, 1mmol) were added to a 250 mL round-bottom flask, placed under nitrogen, dissolved in THF/ $\text{H}_2\text{O}$  (20 mL/10 mL), and stirred for 12 h at 80 °C. After completion as determined by TLC analysis, the reaction mixture was extracted with EA ( $3 \times 20$  mL) and the combined organic layers were washed with brine (30 mL). The solution was then dried ( $\text{MgSO}_4$ ), filtered, and concentrated. The crude product was purified by flash column chromatography (PE : EA = 20 : 1) to give dimethyl 2-(4-methoxynaphthalen-1-yl)isophthalate (**9**). White solid, 2.02 g, 67% yield. m.p. 217.0-218.8 °C.  $^1\text{H}$  NMR (400 MHz,  $\text{CDCl}_3$ ):  $\delta$  (ppm) 8.30 (d,  $J=10.0$  Hz, 1H), 8.01 (d,  $J=10.0$  Hz, 2H), 7.58-7.55 (m, 1H), 7.47-7.31 (m, 3H), 7.14 (d,  $J=10.0$  Hz, 1H), 6.82 (d,  $J=10.0$  Hz, 1H), 4.04 (s, 3H), 3.33 (s, 6H).  $^{13}\text{C}$  NMR (101 MHz,  $\text{CDCl}_3$ ):  $\delta$  (ppm) 167.96, 155.01, 140.28, 134.21, 133.30, 132.18, 129.21, 127.44, 126.46, 125.75, 125.09, 124.85, 122.07, 102.81, 55.39, 51.98. HRMS-ESI calcd for  $\text{C}_{21}\text{H}_{18}\text{O}_5$   $[\text{M}+\text{H}]^+$  351.1226; found 351.1232.

Dimethyl 2-(4-methoxynaphthalen-1-yl)isophthalate (**9**) (1.0g, 3.3mmol) was added

to a 100 mL round-bottom flask, placed under nitrogen, dissolved in anhydrous THF (50ml). To this solution methylmagnesium bromide (13mmol, 3M, THF) was added dropwise over ~5 min and the mixture was heated at 40 °C for 3 h. After completion as determined by TLC analysis, the reaction mixture was cooled to 0 °C and brine (20 mL) were cautiously added. Then the reaction mixture was extracted with EA (3 × 20 mL) and the combined organic layers were washed with brine (30 mL). The solution was then dried (MgSO<sub>4</sub>), filtered, and concentrated. The crude product was purified by flash column chromatography (PE : EA = 15 : 1) to give 2,2'-(2-(4-methoxynaphthalen-1-yl)-1,3-phenylene)bis(propan-2-ol) (**10**). Pink oil, 822 mg, 71% yield. <sup>1</sup>H NMR (400 MHz, CDCl<sub>3</sub>): δ (ppm) 8.21 (d, *J*=10.0 Hz, 1H), 7.61 (d, *J*=10.0 Hz, 2H), 7.40-7.26 (m, 4H), 7.25-7.17 (m, 1H), 6.79 (d, *J*=10.0 Hz, 1H), 3.98 (s, 3H), 1.22 (s, 6H), 1.11 (s, 6H). <sup>13</sup>C NMR (101 MHz, CDCl<sub>3</sub>): δ (ppm) 155.63, 148.54, 135.64, 134.36, 130.48, 128.62, 127.69, 127.43, 126.70, 125.76, 125.55, 125.23, 122.19, 102.44, 74.98, 55.53, 32.88.

2,2'-(2-(4-Methoxynaphthalen-1-yl)-1,3-phenylene)bis(propan-2-ol) (**10**) (3.4 mmol) was added to a 50 mL round-bottom flask, dissolved in xylene (20ml). To this solution polyphosphoric acid (96 mg, 0.4 mmol) was added and the mixture was heated to reflux at 150 °C for 3 h. After completion as determined by TLC analysis, the reaction mixture was extracted with EA (3 × 20 mL) and the combined organic layers were washed with brine (30 mL). The solution was then dried (MgSO<sub>4</sub>), filtered, and concentrated. The crude product was purified by flash column chromatography (PE : EA = 100 : 1) to give 9-methoxy-1,1,5,5-tetramethyl-1,5-dihydrobenzo[*mno*]aceanthrylene (**11**). White solid, 536 mg, 50% yield. m.p. 173.3-174.7 °C. <sup>1</sup>H NMR(400 MHz, CDCl<sub>3</sub>): δ (ppm) 8.00 (d, *J*=10.0 Hz, 1H), 7.58 (d, *J*=10.0 Hz, 1H), 7.52-7.49 (m, 1H), 7.35 (d, *J*= 10.0 Hz, 1H), 7.23 (d, *J*=10.0 Hz, 2H), 6.92 (s, 1H), 4.05 (s, 3H), 1.73 (s, 6H), 1.58 (s, 6H). <sup>13</sup>C NMR (101 MHz, CDCl<sub>3</sub>): δ (ppm) 155.88, 151.19, 145.18, 144.75, 138.80, 135.07, 126.46, 126.29, 125.59, 124.33, 124.21, 123.88, 123.45, 119.95, 119.93, 100.31, 56.03, 51.83, 40.47, 33.90, 25.99. HRMS-ESI calcd for C<sub>23</sub>H<sub>22</sub>O [M+H]<sup>+</sup> 315.1749; found 315.1737.

9-Methoxy-1,1,5,5-tetramethyl-1,5-dihydrobenzo[*mno*]aceanthrylene (**11**) (3.0 mmol) was added to a 50 mL round-bottom flask, placed under nitrogen, dissolved in DCM (10ml). To this solution BBr<sub>3</sub> (1M, 3.2 mmol) was added and the mixture was cooled at 0 °C for 4 h. After completion as determined by TLC analysis, the reaction mixture was extracted with EA (3 × 20 mL) and the combined organic layers were washed with brine (30 mL). The solution was then dried (MgSO<sub>4</sub>), filtered, and concentrated. The crude product was purified by flash column chromatography (PE : EA = 100 : 1) to give 1,1,5,5-tetramethyl-1,5-dihydrobenzo[*mno*]aceanthrylen-9-ol (**12**). White solid, 1.27 g, 86% yield. m.p. 221.2-222.3 °C. <sup>1</sup>H NMR (400 MHz, DMSO-d<sub>6</sub>) δ (ppm) 10.06 (s, 1H), 7.95 (d, *J*=10.0 Hz, 1H), 7.62 (d, *J*=10.0 Hz, 1H), 7.48-7.46 (m, 1H), 7.36 (d, *J*= 10.0 Hz, 1H), 7.26 (d, *J*=10.0 Hz, 1H), 7.16-7.13 (m, 1H), 7.04 (s, 1H), 1.65 (s, 6H), 1.51 (s, 6H). <sup>13</sup>C NMR (101 MHz, DMSO-d<sub>6</sub>) δ (ppm)

153.87, 150.84, 146.11, 144.77, 138.32, 134.92, 126.69, 126.28, 124.25, 124.16, 123.96, 123.86, 123.58, 120.53, 120.42, 104.76, 51.55, 40.43, 34.20, 26.24. HRMS-ESI calcd for C<sub>37</sub>H<sub>30</sub>O [M+H]<sup>+</sup> 491.2369; found 491.2367.

1,1,5,5-Tetramethyl-1,5-dihydrobenzo[*mno*]aceanthrylen-9-ol (**12**) (0.68 mmol), alkynol (0.76 mmol) were added to a 50 mL round-bottom flask, dissolved in toluene (20 mL), followed by dodecylbenzenesulphonic acid (1~2 drop) and the resulting mixture was stirred for 3 h at 40 °C. After completion as determined by TLC analysis, the reaction mixture was extracted with EA (3×20 mL) and the combined organic layers were washed with brine (30 mL). The solution was then dried (MgSO<sub>4</sub>), filtered, and concentrated. The crude product was purified by flash column chromatography (PE : EA = 50 : 1) to give **5/6NP-a**, **5/6NP-b**, and **5/6NP-c**, respectively.

**8,8,12,12-Tetramethyl-3,3-diphen-yl-8,12-dihydro-3H-aceanthryleno[1,10-fgh]chromene (5/6NP-a)**

Light purple solid, 244 mg, 73% yield. m.p. 232.8- 233.9 °C. <sup>1</sup>H NMR (400 MHz, CDCl<sub>3</sub>): δ (ppm) 8.10 (d, *J*=10.0 Hz, 1H), 7.59-7.47 (m, 6H), 7.32 (m, 6H), 7.23 (d, *J* = 10.0 Hz, 3H), 7.14 (d, *J*=10.0 Hz, 1H), 6.25 (d, *J* = 10.0 Hz, 1H), 1.65 (s, 6H), 1.71 (s, 6H). <sup>13</sup>C NMR (101 MHz, CDCl<sub>3</sub>) δ (ppm) 151.54, 147.55, 145.31, 144.80, 140.18, 138.94, 134.63, 128.15, 127.81, 127.44, 126.92, 126.70, 126.66, 126.32, 124.17, 123.70, 123.66, 123.45, 120.73, 119.95, 119.55, 114.22, 82.45, 52.36, 40.16, 33.91, 25.81. HRMS-ESI calcd for C<sub>37</sub>H<sub>30</sub>O [M+H]<sup>+</sup> 491.2369; found 491.2370.

**3,3-Bis(4-methoxyphenyl)-8,8,12,12-te-tramethyl-8,12-dihydro-3H-aceanthryleno[1,10-fgh]chromene (5/6NP-b)**

Purple solid, 214 mg, 57% yield. m.p. 221.2-222.3 °C. <sup>1</sup>H NMR(400 MHz, CDCl<sub>3</sub>) δ (ppm) 8.05 (d, *J* = 10.0 Hz, 1H), 7.51-7.38 (m, 7H), 7.29 (d, *J* = 10.0 Hz, 1H), 7.20 (s, 1H), 7.08 (d, *J* = 10.0 Hz, 1H), 6.81 (d, *J* = 10.0 Hz, 4H), 6.16 (d, *J* = 10.0 Hz, 1H), 3.71 (s, 6H), 1.64 (s, 6H), 1.68 (s, 6H). <sup>13</sup>C NMR (101 MHz, CDCl<sub>3</sub>) δ (ppm) 158.86, 151.56, 144.82, 140.23, 138.94, 137.69, 134.75, 128.27, 126.70, 126.63, 126.21, 124.17, 123.74, 123.67, 123.48, 120.35, 120.00, 119.59, 114.28, 113.52, 113.47, 82.09, 55.23, 52.39, 40.19, 33.95, 25.85. HRMS-ESI calcd for C<sub>39</sub>H<sub>34</sub>O<sub>3</sub> [M+H]<sup>+</sup> 551.2581; found 551.2589.

**3-([1,1'-Biphenyl]-4-yl)-8,8,12,12-te-tramethyl-3-phenyl-8,12-dihydro-3H-aceanthryleno[1,10-fgh]chromene (5/6NP-c)**

Blue solid, 239 mg, 62% yield. m.p. 227.1-228.5 °C <sup>1</sup>H NMR (400 MHz, CDCl<sub>3</sub>): δ (ppm) 8.19-8.11 (m, 1H), 7.62 (t, *J*=10.0 Hz, 4H), 7.59-7.50 (m, 6H), 7.45-7.31 (m, 6H), 7.28 (d, *J*=10.0 Hz, 1H), 7.24 (s, 2H), 7.18 (d, *J*=10.0 Hz, 1H), 6.30 (d, *J* = 10.0 Hz, 1H), 1.73 (s, 6H), 1.67 (s, 6H). <sup>13</sup>C NMR (101 MHz, CDCl<sub>3</sub>) δ (ppm) 151.59, 147.62, 145.30, 144.89, 144.39, 140.71, 140.31, 140.24, 139.00, 134.70, 128.78, 128.27, 127.80, 127.56, 127.41, 127.35, 127.14, 126.96, 126.80, 126.78, 126.44, 124.24, 123.81, 123.73, 123.52, 120.84, 120.02, 119.63, 114.30, 82.39, 52.43, 40.22, 34.01, 33.95, 25.89. HRMS-ESI calcd for C<sub>43</sub>H<sub>34</sub>O [M+H]<sup>+</sup> 567.2681; found 567.2690.

4-Bromo-naphthalen-1-ol (2.2 g, 10 mmol), phenylboronic acid (12 mmol), sodium carbonate (5.1 g, 48 mmol) and Pd(PPh<sub>3</sub>)<sub>4</sub> (1.1 g, 1 mmol) were added to a 250 mL round-bottom flask, and dissolved in THF/H<sub>2</sub>O (40 mL/16 mL), and stirred for 12 h at 80°C. After completion as determined by TLC analysis, the reaction mixture was extracted with EA (3 × 20 mL) and the combined organic layers were washed with brine (30 mL). The solution was then dried (MgSO<sub>4</sub>), filtered, and concentrated. The crude product was purified by flash column chromatography (PE: EA=100:1) to give 4-phenylnaphthalen-1-ol (**13**). White solid, 1.5 g, 68% yield. m.p. 131.7-133.3 °C. <sup>1</sup>H NMR (400 MHz, CDCl<sub>3</sub>): δ (ppm) 8.27 (d, *J* = 8.0 Hz, 1H), 7.89 (d, *J* = 8.0 Hz, 1H), 7.55-7.36 (m, 7H), 7.27 (d, *J* = 8.0 Hz, 1H), 6.88 (d, *J* = 8.0 Hz, 1H), 5.25 (s, 1H). <sup>13</sup>C NMR (101 MHz, CDCl<sub>3</sub>): δ (ppm) 150.33, 140.22, 132.73, 132.14, 129.70, 127.68, 126.37, 126.26, 126.00, 125.43, 124.61, 123.87, 121.26, 107.60. HRMS-ESI calcd for C<sub>16</sub>H<sub>11</sub>FO [M+H]<sup>+</sup> 221.0961; found 221.0962.

4-Phenylnaphthalen-1-ol (**13**) (1.28 mmol), alkynol (1.6 mmol), and toluene (40 mL) were added to a 100 mL round-bottom flask, followed by dodecylbenzenesulphonic acid (1~2 drop) and the resulting mixture was stirred for 3 h at 40°C. After completion as determined by TLC analysis, the reaction mixture was extracted with EA (3 × 20 mL) and the combined organic layers were washed with brine (30 mL). The solution was then dried (MgSO<sub>4</sub>), filtered, and concentrated. The crude product was purified by flash column chromatography (PE: EA=100:1) to give **NP-a**, **NP-b**, and **NP-c**, respectively.

#### **2,2,6-Triphenyl-2H-benzo[h]chromene (NP-a)**

White solid, 410 mg, 78% yield. m.p. 140.1-141.6 °C. <sup>1</sup>H NMR (400 MHz, CDCl<sub>3</sub>): δ (ppm) 8.44 (d, *J* = 8.0 Hz, 1H), 7.78 (d, *J* = 8.0 Hz, 1H), 7.58-7.30 (m, 15H), 7.30-7.23 (m, 2H), 7.12 (m, 1H), 6.75 (m, 1H), 6.22 (m, 1H). <sup>13</sup>C NMR (101 MHz, CDCl<sub>3</sub>): δ (ppm) 147.24, 145.24, 140.61, 133.03, 132.70, 130.19, 128.20, 127.59, 127.54, 127.12, 127.01, 126.96, 126.92, 126.87, 126.85, 126.83, 126.41, 125.99, 125.55, 125.48, 124.79, 123.71, 122.23, 114.88, 83.36. HRMS-ESI calcd for C<sub>16</sub>H<sub>11</sub>FO [M+H]<sup>+</sup> 411.1743; found 411.1740.

#### **2,2-Bis(4-methoxyphenyl)-6-phenyl-2H-benzo[h]chromene (NP-b)**

Light pink solid, 537 mg, 89% yield. m.p. 115.6-117.4 °C. <sup>1</sup>H NMR (400 MHz, CDCl<sub>3</sub>): δ (ppm) 8.46-8.44 (m, 1H), 7.84-7.80 (m, 1H), 7.48-7.44 (m, 11H), 7.22-7.10 (m, 1H), 6.93-6.84 (m, 4H), 6.80-6.70 (m, 1H), 6.26-6.14 (m, 1H), 3.81 (s, 6H). <sup>13</sup>C NMR (101 MHz, CDCl<sub>3</sub>): δ (ppm) 158.94, 147.30, 140.67, 137.62, 132.85, 132.68, 130.23, 128.25, 128.06, 126.93, 126.34, 125.99, 125.59, 125.40, 124.86, 123.35, 122.26, 115.02, 113.51, 100.06, 82.87, 55.24. HRMS-ESI calcd for C<sub>16</sub>H<sub>11</sub>FO [M+H]<sup>+</sup> 471.1955; found 471.1961.

#### **2-([1,1'-Biphenyl]-4-yl)-2,6-diphenyl-2H-benzo[h]chromene (NP-c)**

Light purple solid, 455 mg, 73% yield. m.p. 156.3-158.1 °C. <sup>1</sup>H NMR (400 MHz,

CDCl<sub>3</sub>):  $\delta$  (ppm) 8.48 (d,  $J$  = 8.4 Hz, 1H), 7.80 (d,  $J$  = 8.4 Hz, 1H), 7.65-7.54 (m, 8H), 7.54-7.48 (m, 1H), 7.48-7.27 (m, 12H), 7.15 (s, 1H), 6.78 (d,  $J$  = 10.0 Hz, 1H), 6.27 (d,  $J$  = 10.0 Hz, 1H). <sup>13</sup>C NMR (101 MHz, CDCl<sub>3</sub>)  $\delta$  (ppm) 147.27, 145.19, 144.26, 140.67, 140.60, 140.41, 133.10, 132.74, 130.22, 128.77, 128.28, 128.25, 127.63, 127.54, 127.38, 127.35, 127.13, 126.98, 126.94, 126.47, 126.04, 125.59, 125.55, 124.82, 123.81, 122.26, 114.92, 83.29. HRMS-ESI calcd for C<sub>16</sub>H<sub>11</sub>FO [M+H]<sup>+</sup> 487.2056; found 487.2063.

### Preparation of composite photochromic polymer film

The polymethyl methacrylate (PMMA) and the photochromic compound **5NP-F-b** were dissolved in THF. The solution was placed on a glass slide in horizontal in dark and the solvent was allowed to evaporate overnight at room temperature. Then the film was removed from the glass slide and the film thickness was measured with a micrometer. The thickness of the film was kept about 1 mm by controlling the solution used, and the concentration of the photochromic compounds in the PMMA film were maintained in 1% w/w.

### 3. Crystal data of 5NP-F-b

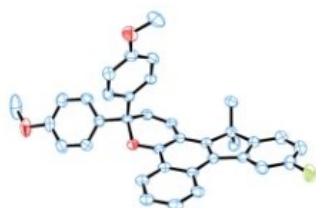

**Table S1.** Crystal data and structure refinement for **5NP-F-b**

|                                        |                                                                                                                      |
|----------------------------------------|----------------------------------------------------------------------------------------------------------------------|
| <b>Identification code</b>             | <b>5NP-F-b</b>                                                                                                       |
| <b>Empirical formula</b>               | C <sub>36</sub> H <sub>29</sub> FO <sub>3</sub>                                                                      |
| <b>Formula weight</b>                  | 1099.64                                                                                                              |
| <b>Temperature</b>                     | 113(2) K                                                                                                             |
| <b>Wavelength</b>                      | 0.71073 Å                                                                                                            |
| <b>Crystal system, space group</b>     | Monoclinic, P2(1)/n                                                                                                  |
| <b>Unit cell dimensions</b>            | a = 17.961(4) Å    alpha = 90 deg.<br>b = 12.157(2) Å    beta = 104.70(3) deg.<br>c = 26.684(5) Å    gamma = 90 deg. |
| <b>Volume</b>                          | 5636(2) Å <sup>3</sup>                                                                                               |
| <b>Z, Calculated density</b>           | 4, 1.296 g/cm <sup>3</sup>                                                                                           |
| <b>Absorption coefficient</b>          | 0.131 mm <sup>-1</sup>                                                                                               |
| <b>F(000)</b>                          | 2308                                                                                                                 |
| <b>Crystal size</b>                    | 0.200 x 0.180 x 0.120 mm                                                                                             |
| <b>Theta range for data collection</b> | 1.236 to 25.017 deg.                                                                                                 |
| <b>Reflections collected / unique</b>  | 53341 / 9946 [R(int) = 0.0986]                                                                                       |
| <b>Completeness to theta = 25.017</b>  | 99.9 %                                                                                                               |
| <b>Absorption correction</b>           | Semi-empirical from equivalents                                                                                      |



|                                         |                                                   |
|-----------------------------------------|---------------------------------------------------|
| <b>Max. and min. transmission</b>       | 1 and 0.8653                                      |
| <b>Refinement method</b>                | Full-matrix least-squares on F <sup>2</sup>       |
| <b>Data / restraints / parameters</b>   | 9946 / 32 / 756                                   |
| <b>Goodness-of-fit on F<sup>2</sup></b> | 1.121                                             |
| <b>Final R indices [I&gt;2sigma(I)]</b> | R <sub>1</sub> = 0.0892, wR <sub>2</sub> = 0.2341 |
| <b>R indices (all data)</b>             | R <sub>1</sub> = 0.1226, wR <sub>2</sub> = 0.2618 |
| <b>CCDC no.</b>                         | 2049253                                           |

## 4. NMR Spectra

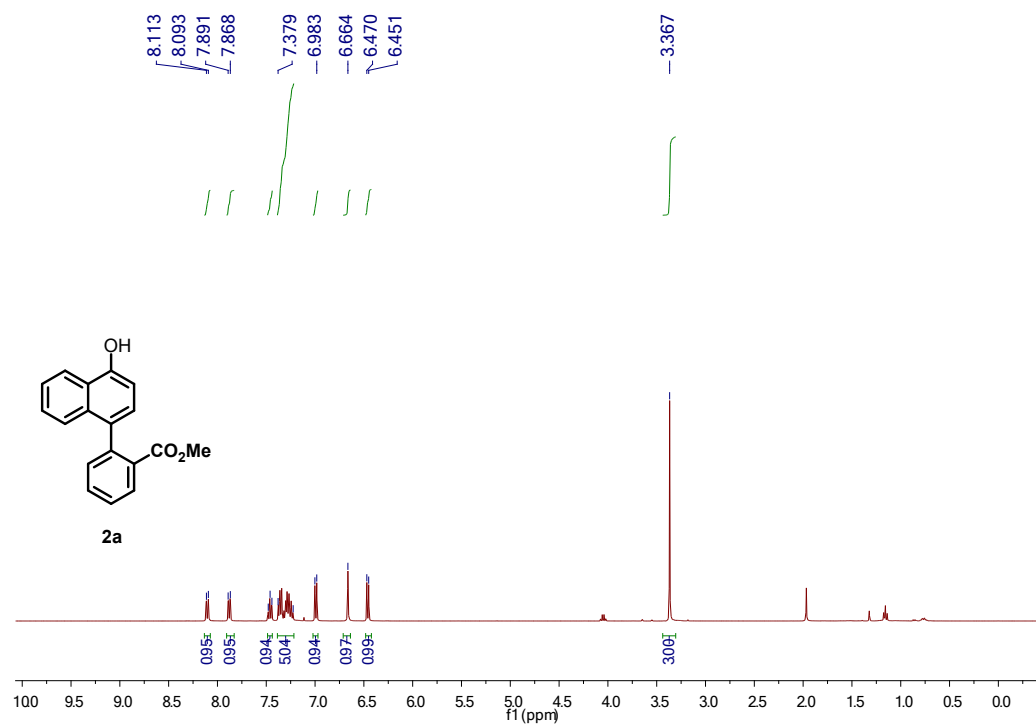

**Fig. S1.**  $^1\text{H}$  NMR spectrum of methyl 2-(4-hydroxynaphthalen-1-yl)benzoate (**2a**) in  $\text{CDCl}_3$ .

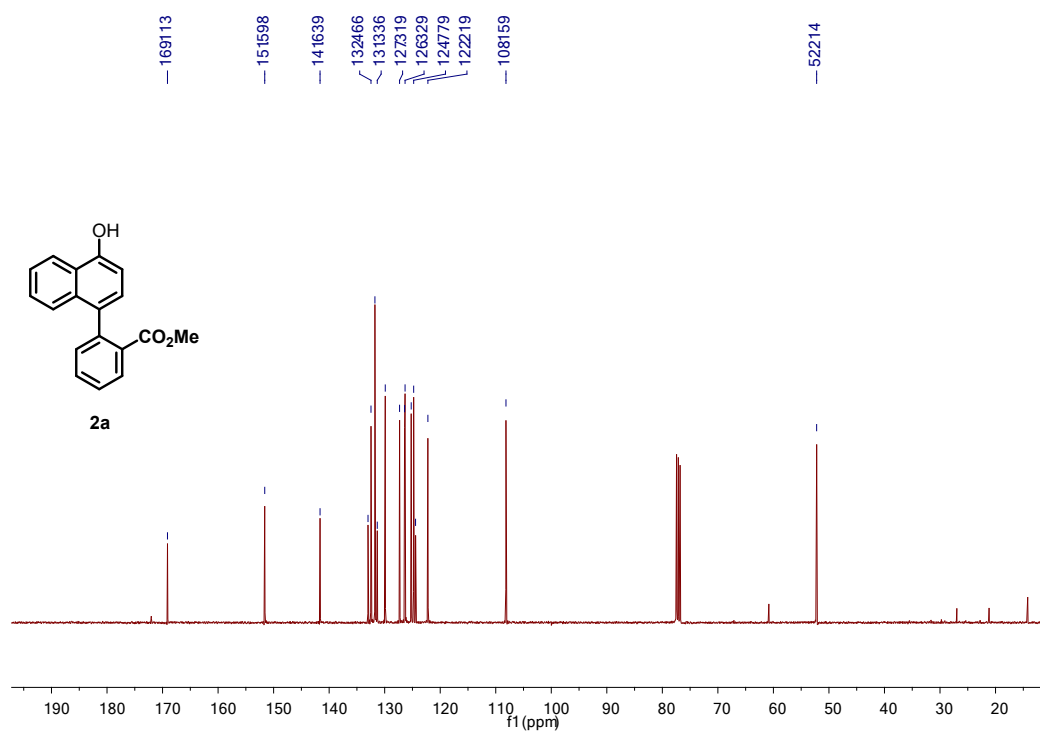

**Fig. S2.**  $^{13}\text{C}$  NMR spectrum of methyl 2-(4-hydroxynaphthalen-1-yl)benzoate (**2a**) in  $\text{CDCl}_3$ .

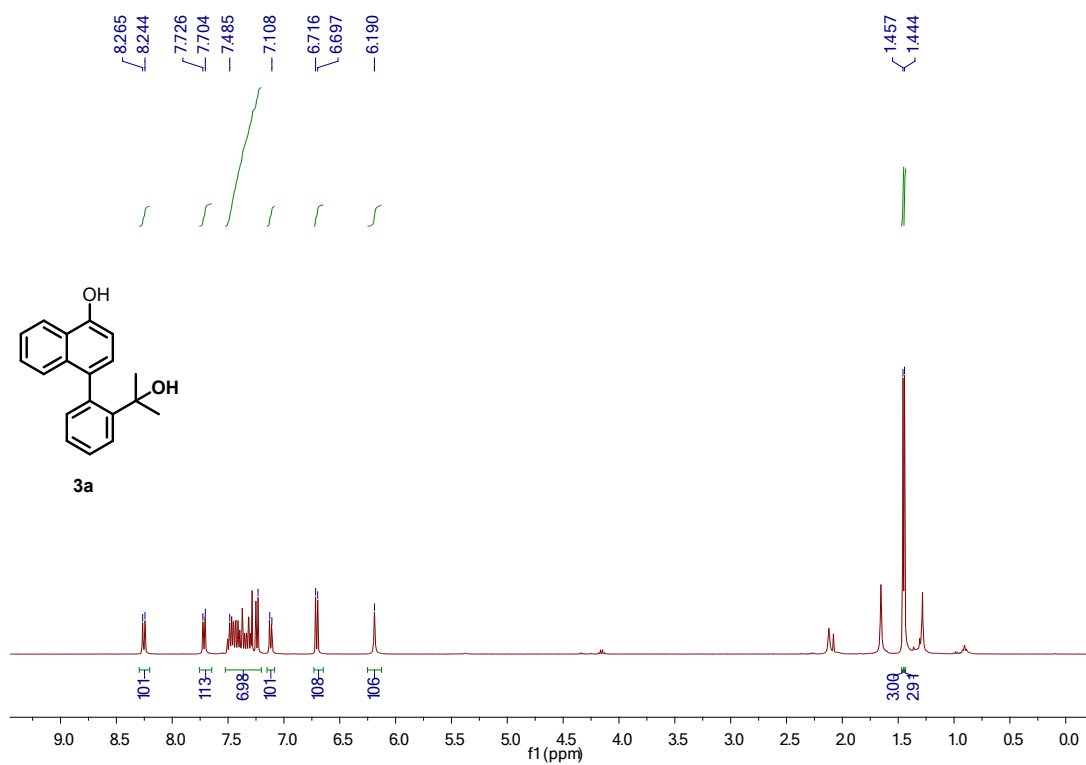

**Fig. S3.** <sup>1</sup>H NMR spectrum of 4-(2-(2-hydroxypropan-2-yl)phenyl)naphthalen-1-ol (**3a**) in CDCl<sub>3</sub>.

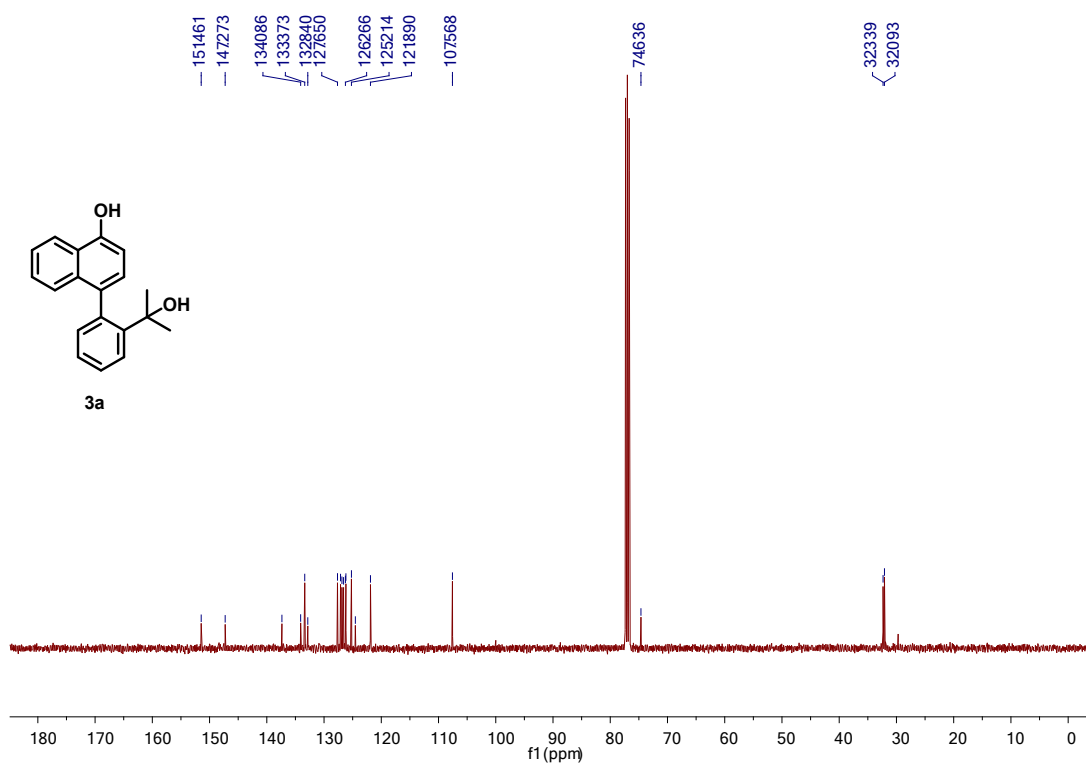

**Fig. S4.** <sup>13</sup>C NMR spectrum of 4-(2-(2-hydroxypropan-2-yl)phenyl)naphthalen-1-ol (**3a**) in CDCl<sub>3</sub>.

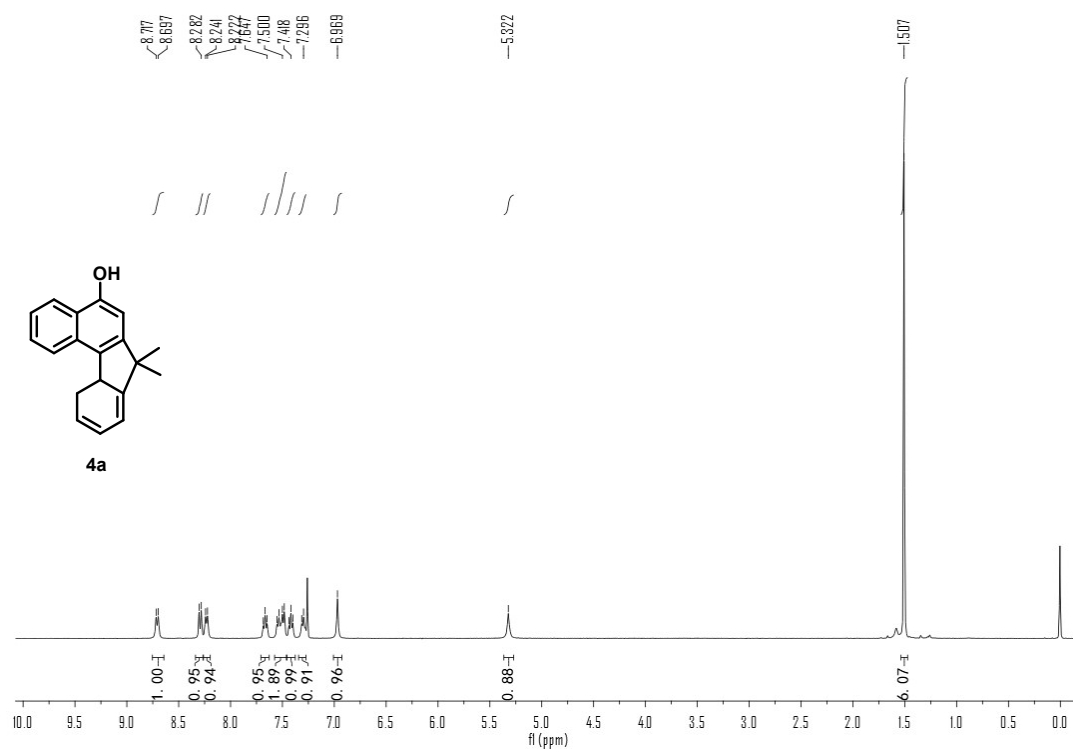

Fig. S5. <sup>1</sup>H NMR spectrum of 7,7-Dimethyl-7H-benzo[c]fluoren-5-ol (4a) in CDCl<sub>3</sub>.

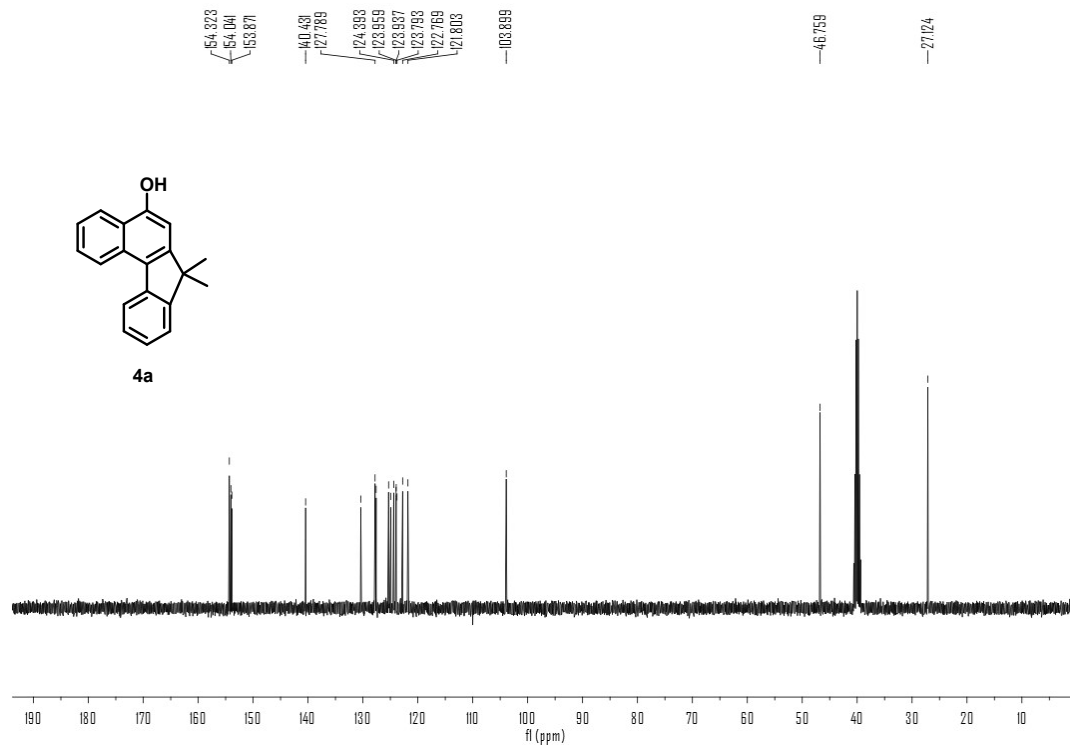

Fig. S6. <sup>13</sup>C NMR spectrum of 7,7-Dimethyl-7H-benzo[c]fluoren-5-ol (4a) in CDCl<sub>3</sub>.

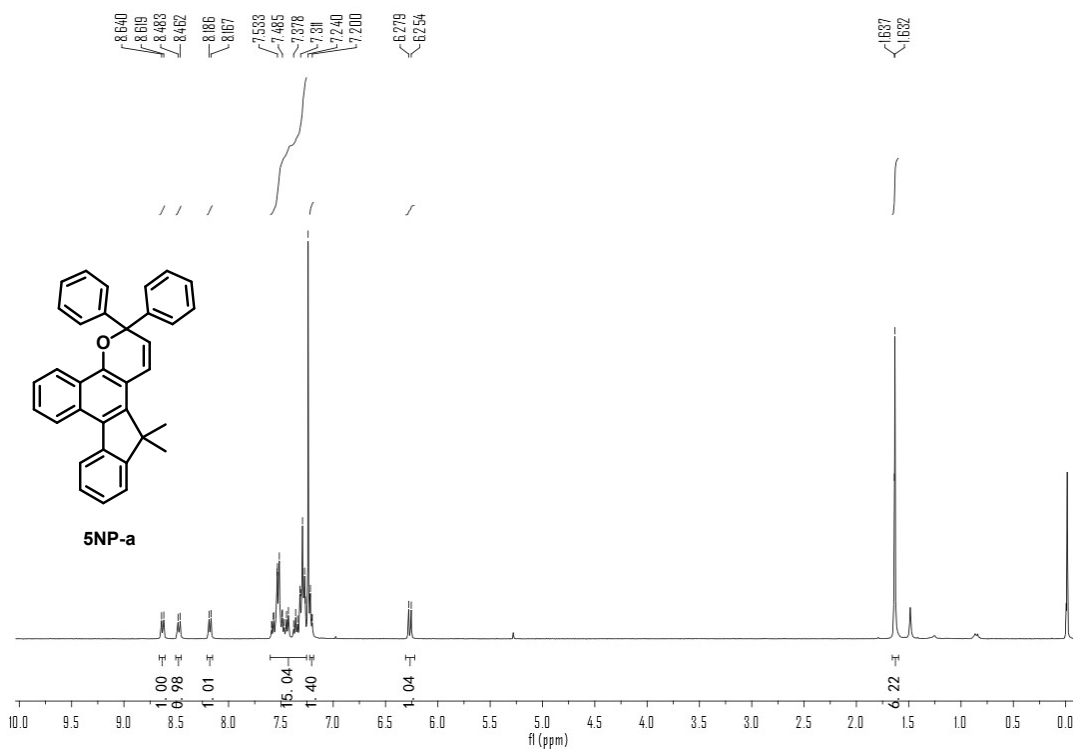

**Fig. S7.**  $^1\text{H}$  NMR spectrum of 13,13-dimethyl-3,3-diphenyl-3,13-dihydrobenzo[*h*]indeno[2,1-*f*]chromene in  $\text{CDCl}_3$ .

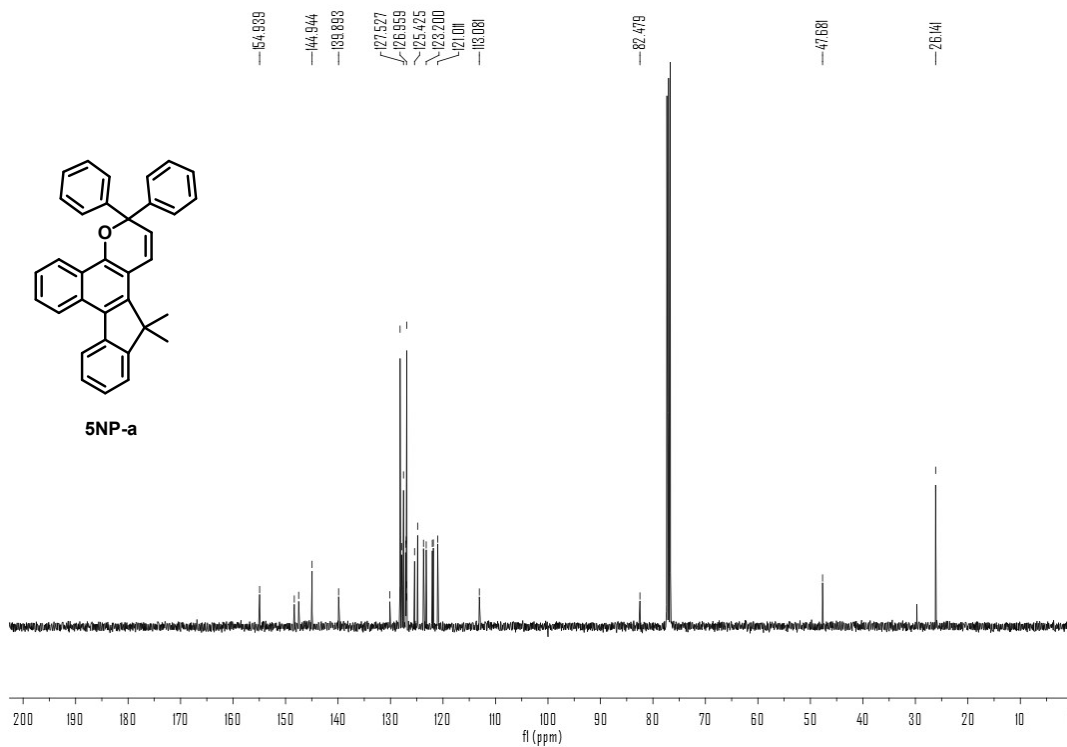

**Fig. S8.**  $^{13}\text{C}$  NMR spectrum of 13,13-dimethyl-3,3-diphenyl-3,13-dihydrobenzo[*h*]indeno[2,1-*f*]chromene in  $\text{CDCl}_3$ .

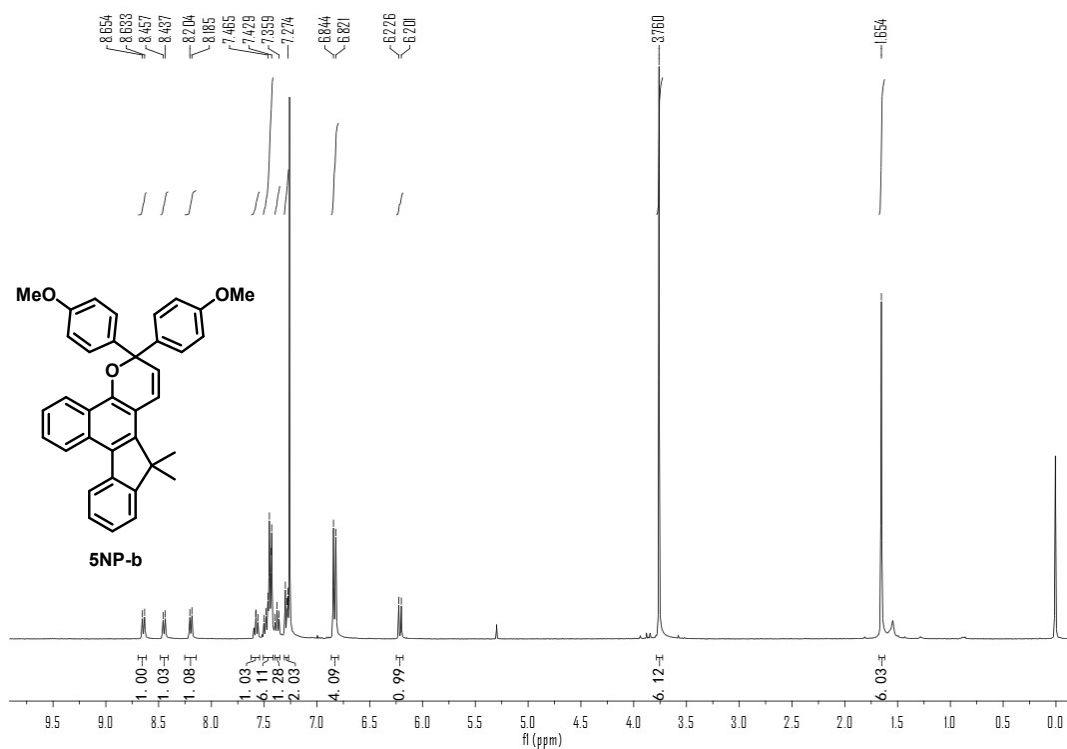

**Fig. S9.** <sup>1</sup>H NMR spectrum of 3,3-bis(4-methoxyphenyl)-13,13-dimethyl-3,13-dihydrobenzo[*h*]indeno[2,1-*f*]chromene in CDCl<sub>3</sub>.

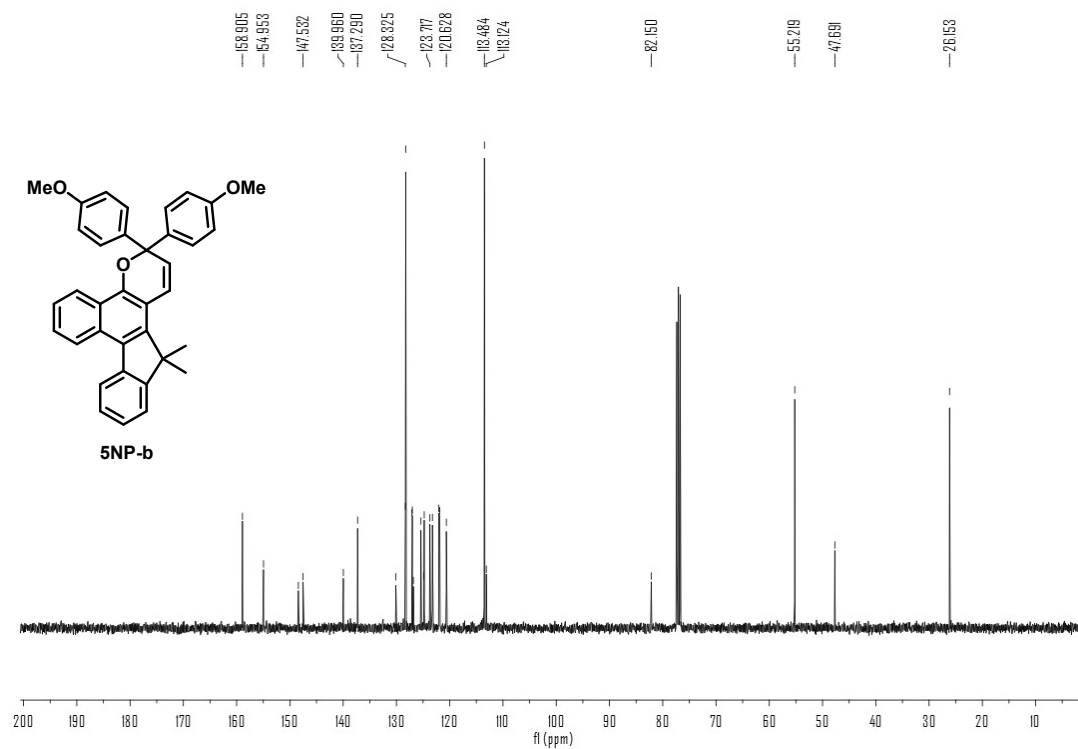

**Fig. S10.** <sup>13</sup>C NMR spectrum of 3,3-bis(4-methoxyphenyl)-13,13-dimethyl-3,13-dihydrobenzo[*h*]indeno[2,1-*f*]chromene in CDCl<sub>3</sub>.

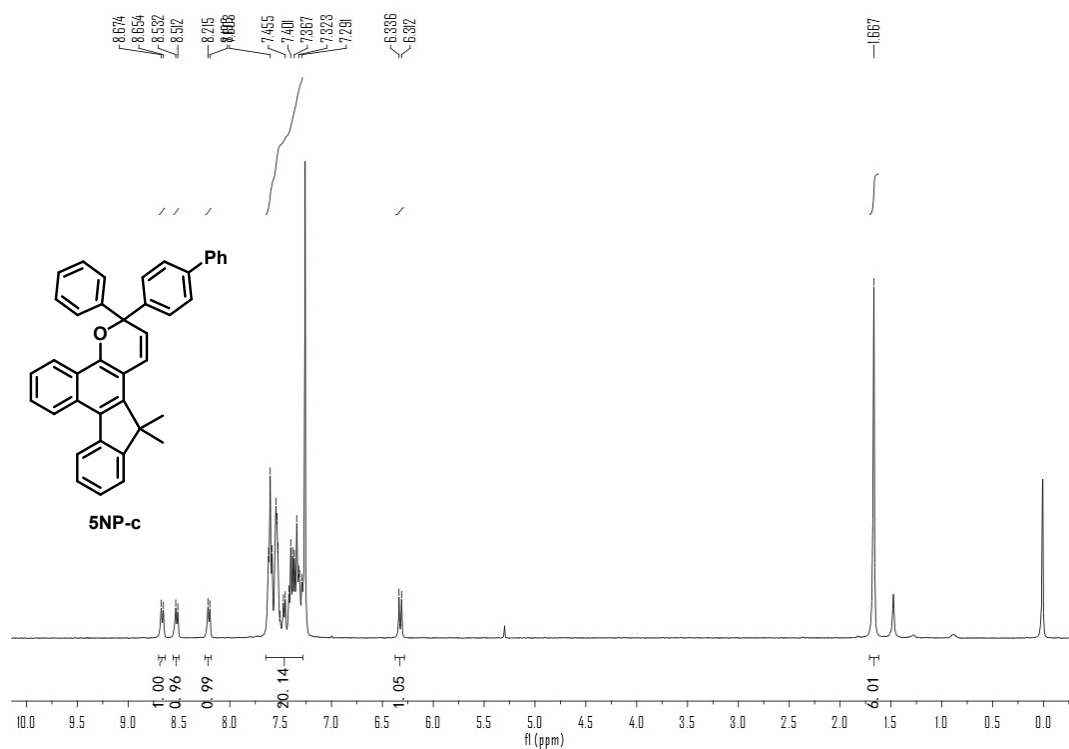

**Fig. S11.** <sup>1</sup>H NMR spectrum of 3-([1,1'-biphenyl]-4-yl)-13,13-dimethyl-3-phenyl-3,13-dihydrobenzo[*h*]indeno[2,1-*f*]chromene in CDCl<sub>3</sub>.

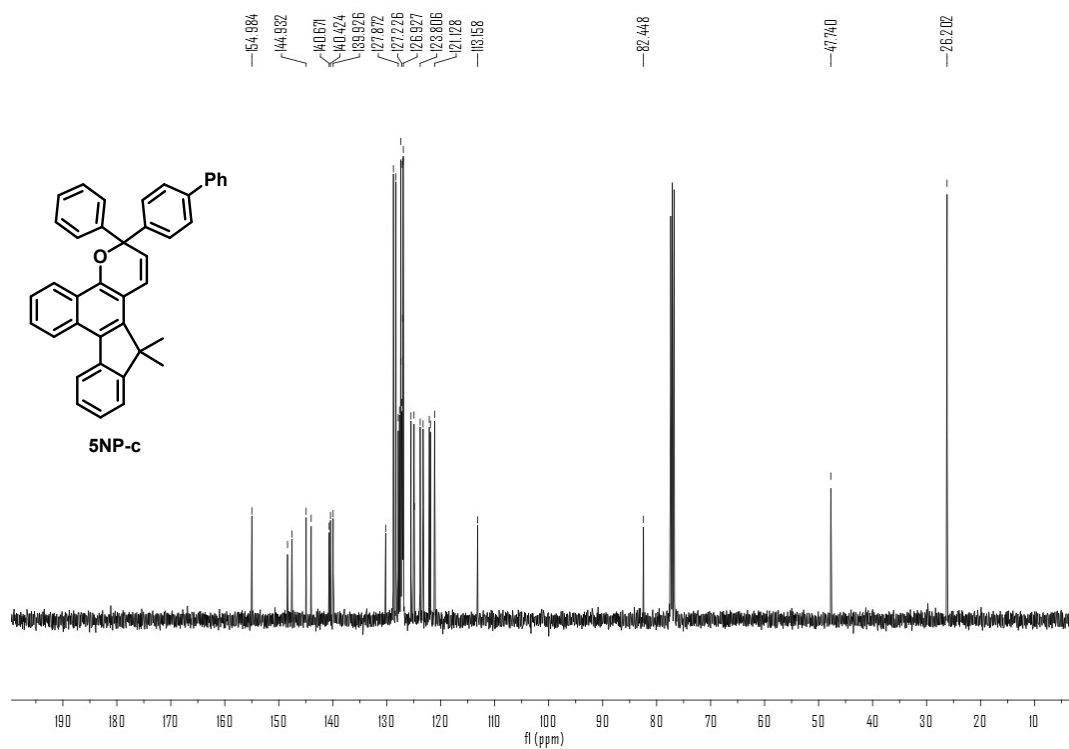

**Fig. S12.** <sup>13</sup>C NMR spectrum of 3-([1,1'-biphenyl]-4-yl)-13,13-dimethyl-3-phenyl-3,13-dihydrobenzo[*h*]indeno[2,1-*f*]chromene in CDCl<sub>3</sub>.

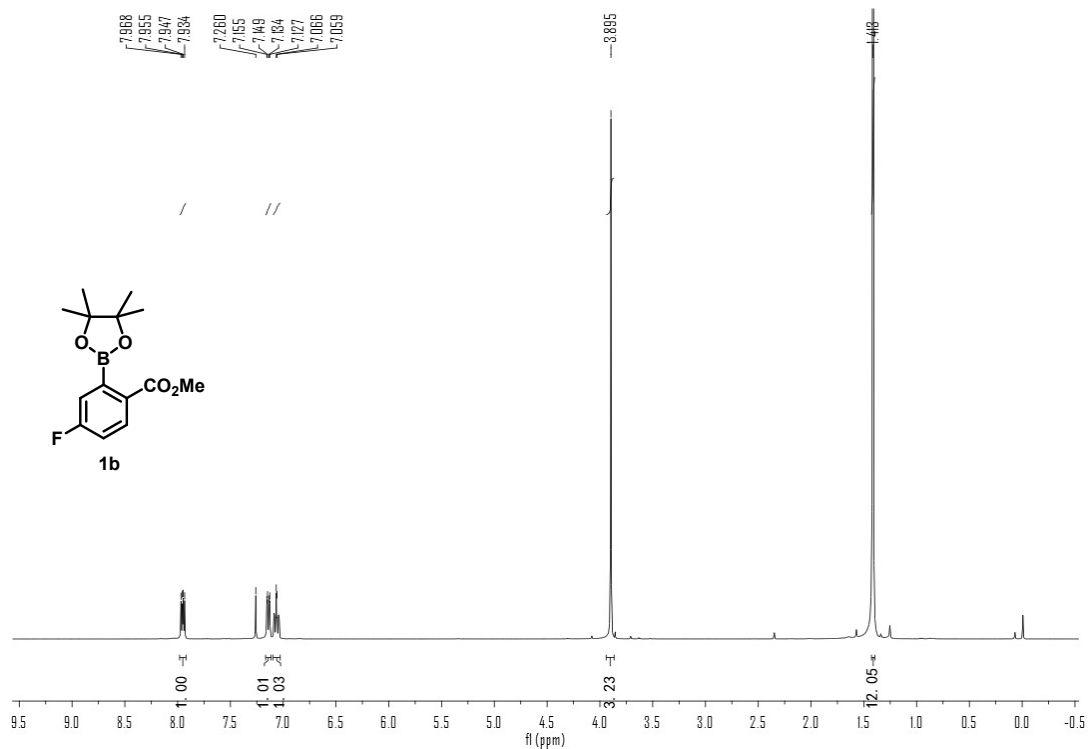

**Fig. S13.**  $^1\text{H}$  NMR spectrum of methyl 4-fluoro-2-(4,4,5,5-tetramethyl-1,3,2-dioxaborolan-2-yl)benzoate (**1b**) in  $\text{CDCl}_3$ .

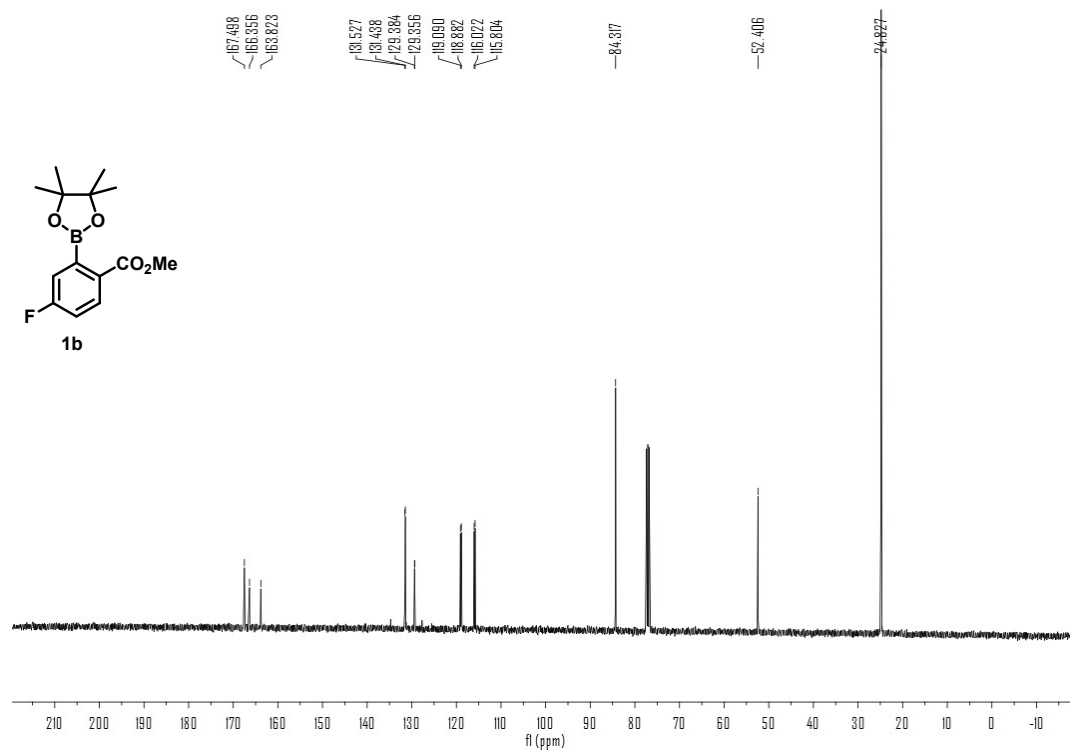

**Fig. S14.**  $^{13}\text{C}$  NMR spectrum of methyl 4-fluoro-2-(4,4,5,5-tetramethyl-1,3,2-dioxaborolan-2-yl)benzoate (**1b**) in  $\text{CDCl}_3$ .



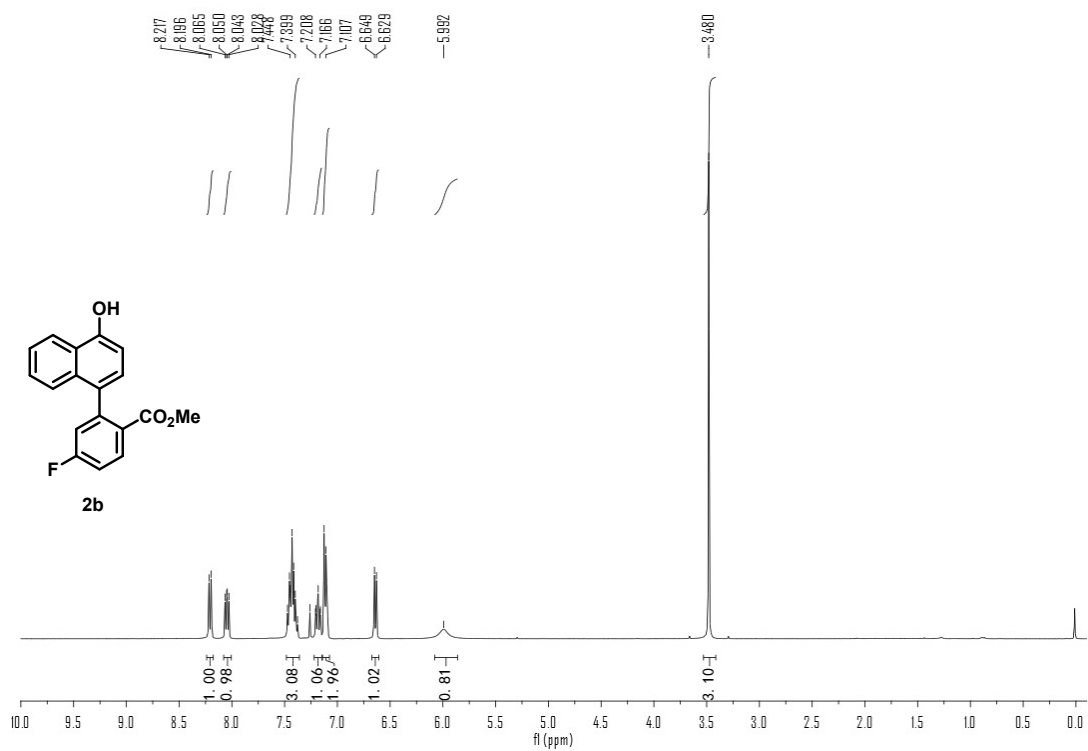

**Fig. S15.** <sup>1</sup>H NMR spectrum of methyl 4-fluoro-2-(4-hydroxynaphthalen-1-yl) benzoate (**2b**) in CDCl<sub>3</sub>.

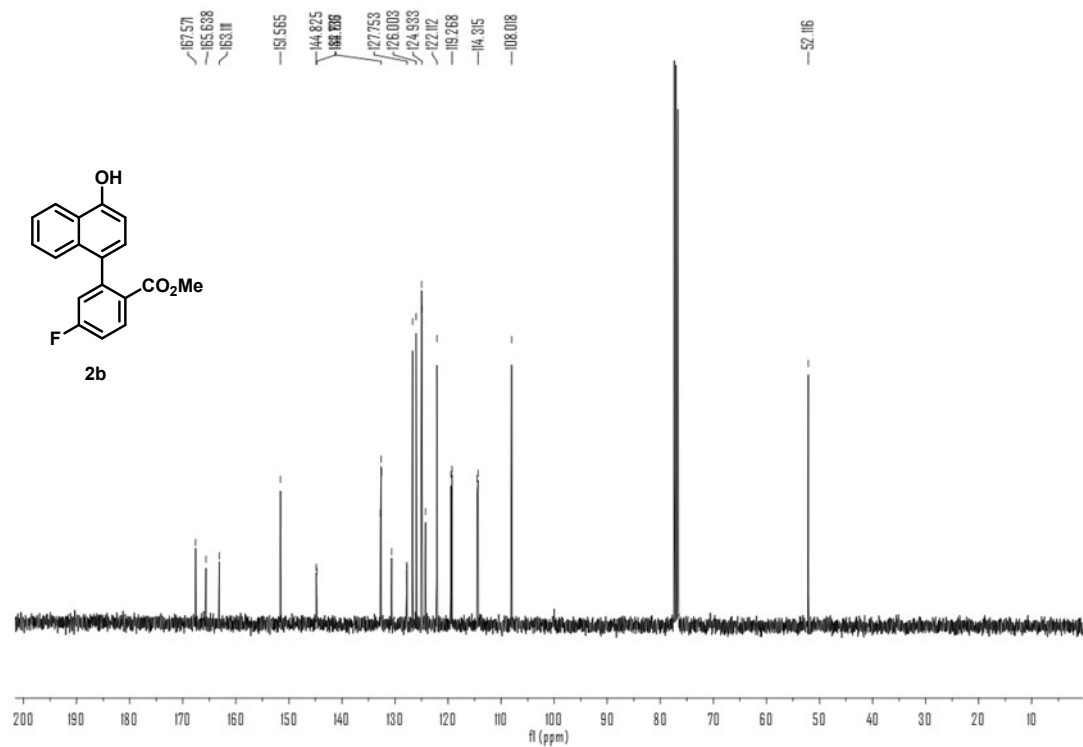

**Fig. S16.** <sup>13</sup>C NMR spectrum of methyl 4-fluoro-2-(4-hydroxynaphthalen-1-yl) benzoate (**2b**) in CDCl<sub>3</sub>.

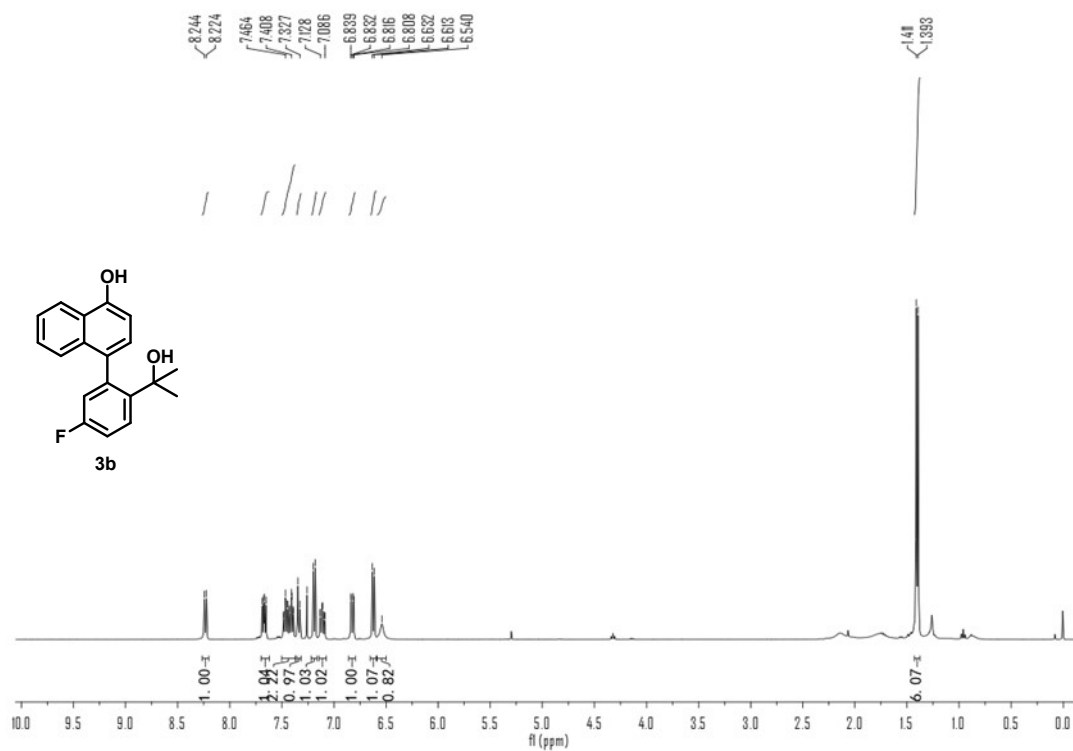

**Fig. S17.** <sup>1</sup>H NMR spectrum of 4-(5-fluoro-2-(2-hydroxypropan-2-yl)phenyl)naphthalen-1-ol (3b) in CDCl<sub>3</sub>.

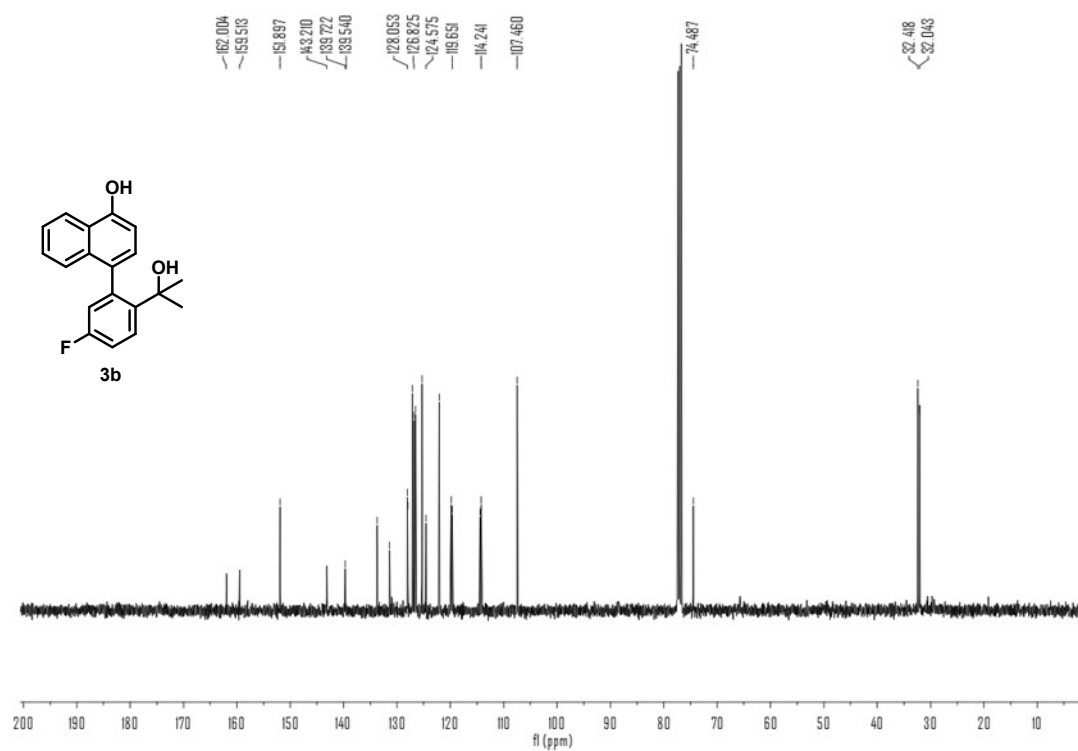

**Fig. S18.** <sup>13</sup>C NMR spectrum of 4-(5-fluoro-2-(2-hydroxypropan-2-yl)phenyl)naphthalen-1-ol (3b) in CDCl<sub>3</sub>.

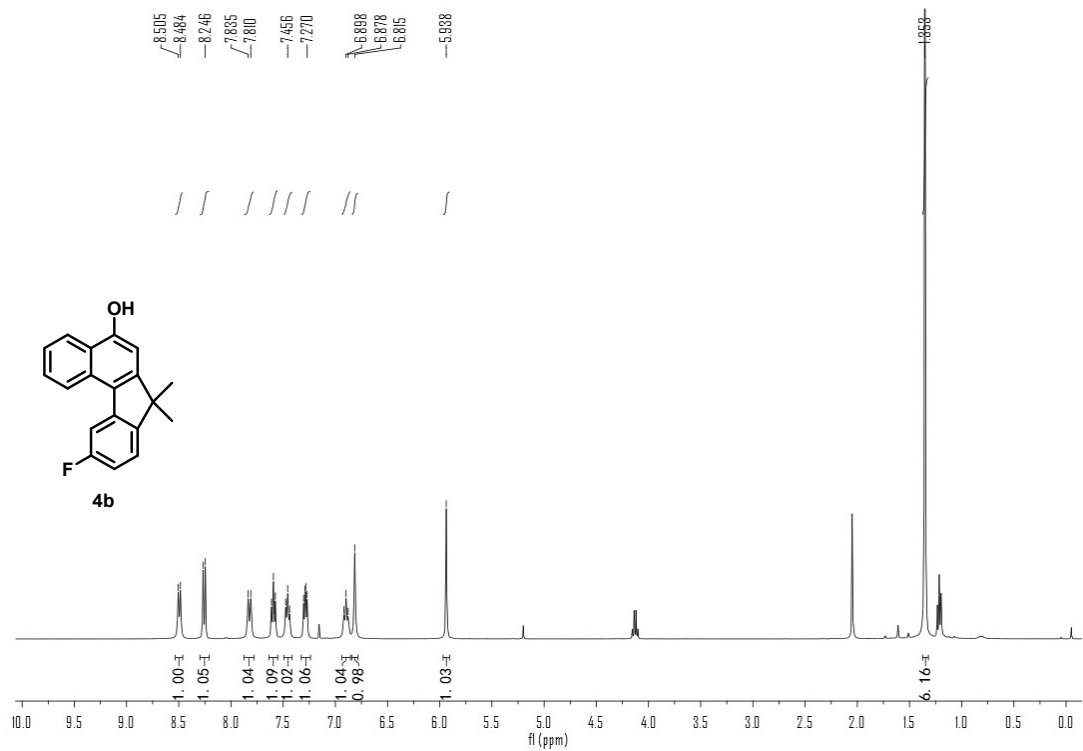

**Fig. S19.** <sup>1</sup>H NMR spectrum of **10-fluoro-7,7-dimethyl-7H-benzo[c]fluoren-5-ol (4b)** in CDCl<sub>3</sub>.

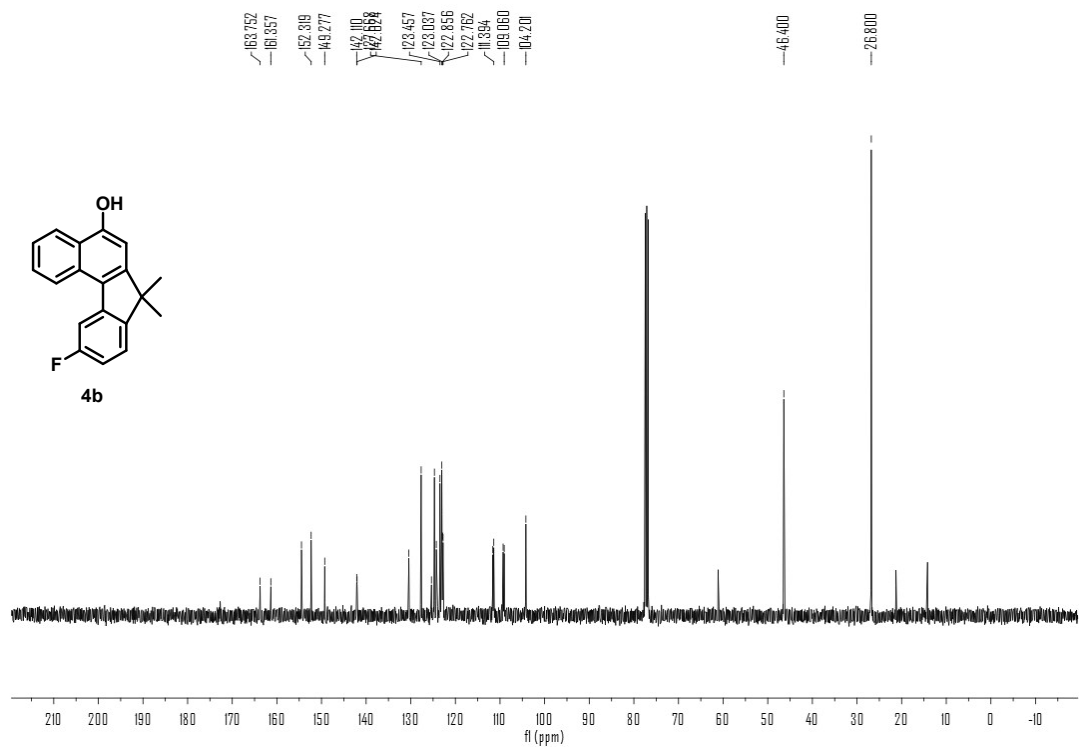

**Fig. S20.** <sup>13</sup>C NMR spectrum of **10-fluoro-7,7-dimethyl-7H-benzo[c]fluoren-5-ol (4b)** in CDCl<sub>3</sub>.

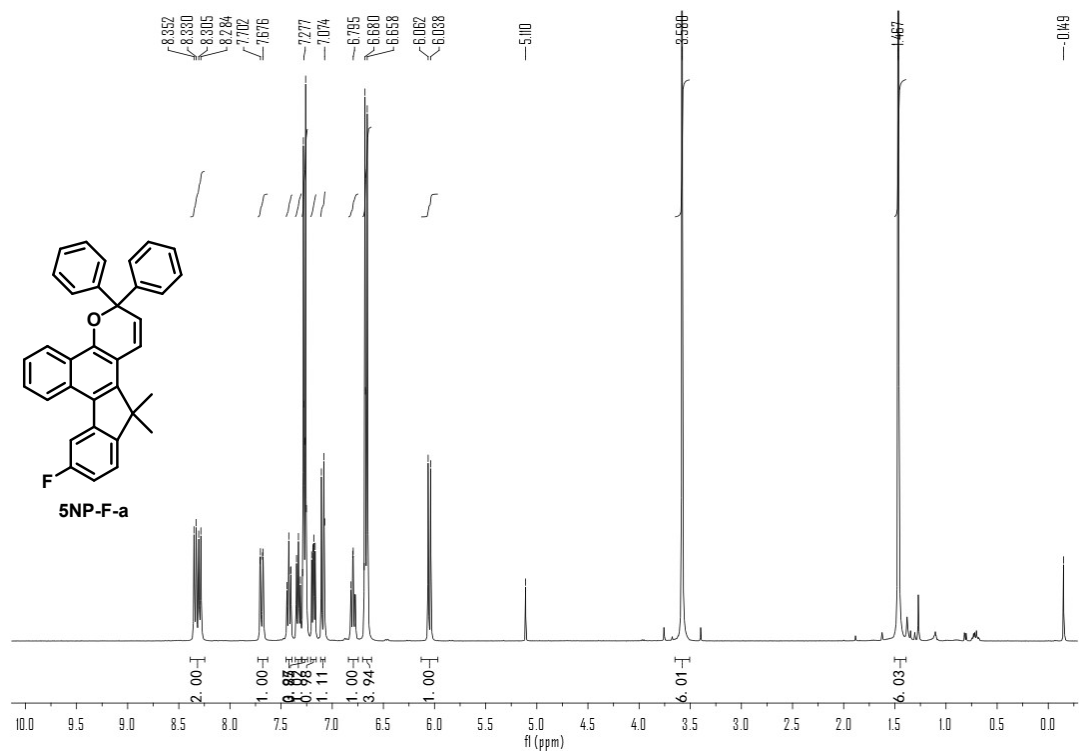

**Figure S21.** <sup>1</sup>H NMR spectrum of 10-fluoro-13,13-dimethyl-3,3-diphenyl-3,13-dihydrobenzo[*h*]indeno[2,1-*f*]chromene in CDCl<sub>3</sub>.

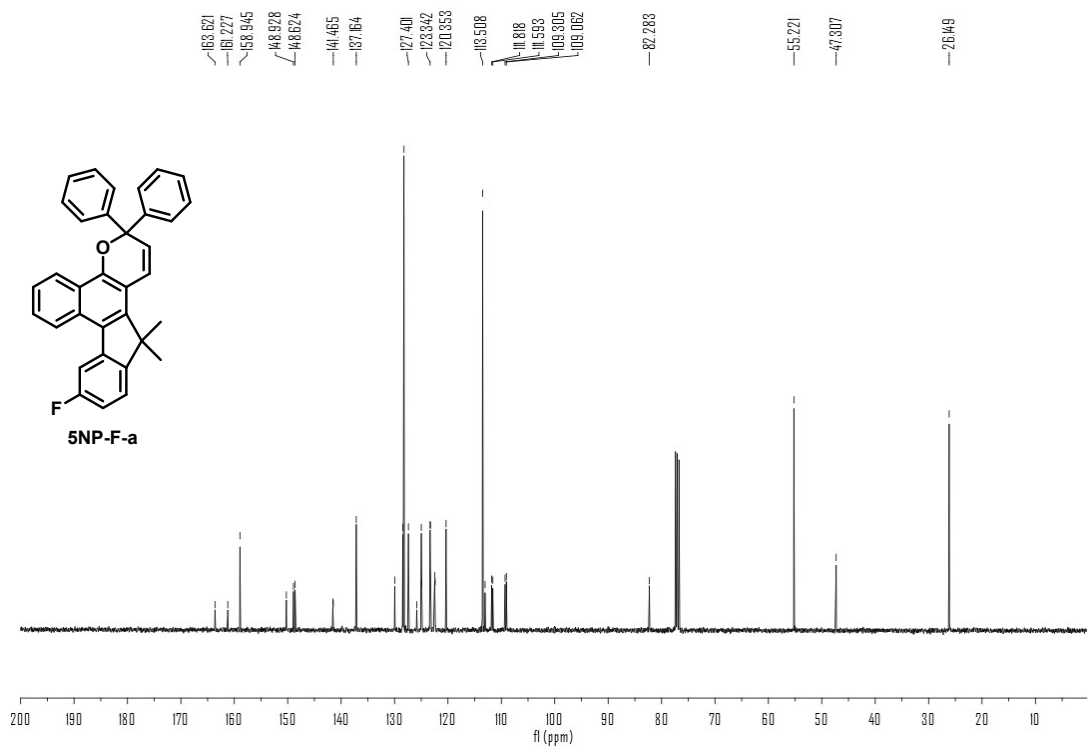

**Figure S22.** <sup>13</sup>C NMR spectrum of 10-fluoro-13,13-dimethyl-3,3-diphenyl-3,13-dihydrobenzo[*h*]indeno[2,1-*f*]chromene in CDCl<sub>3</sub>.

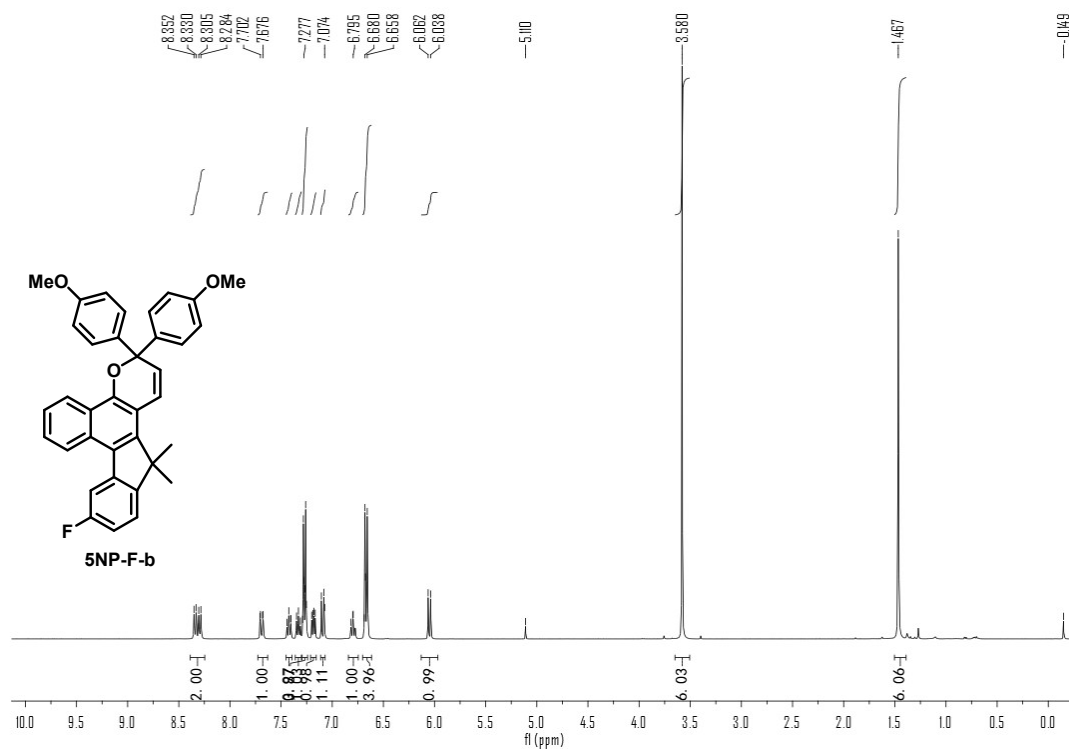

**Fig. S23.** <sup>1</sup>H NMR spectrum of 10-fluoro-3,3-bis(4-methoxyphenyl)-13,13-dimethyl-3,13-dihydrobenzo[*h*]indeno[2,1-*f*]chromene in CDCl<sub>3</sub>.

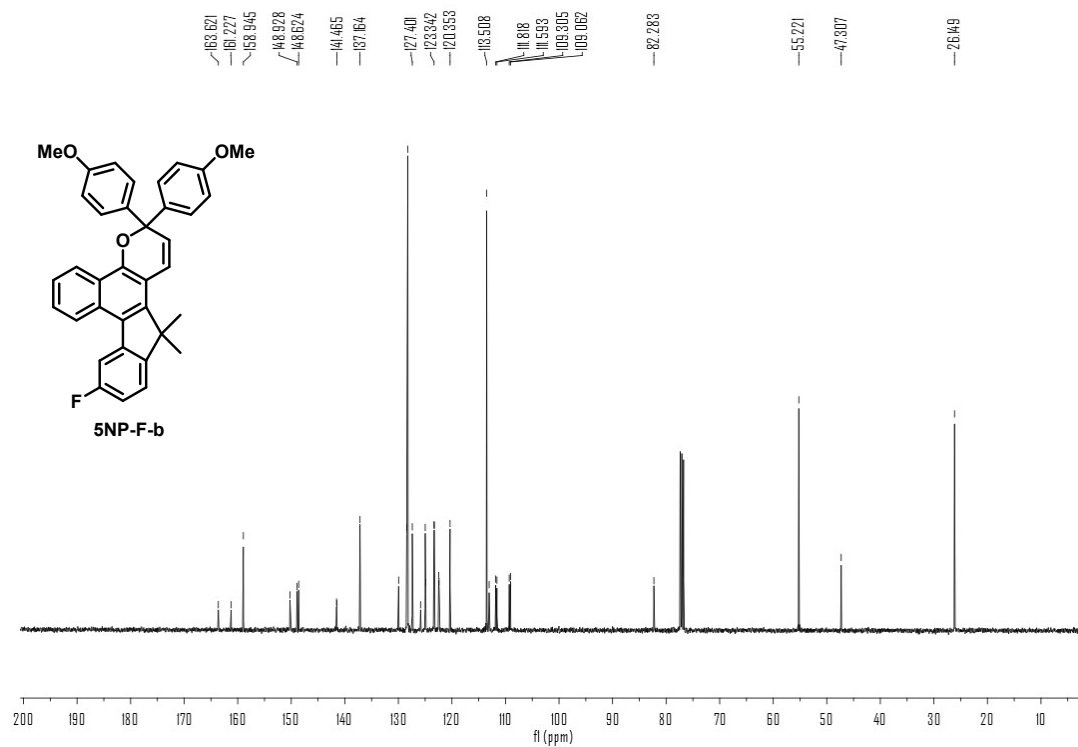

**Fig. S24.** <sup>13</sup>C NMR spectrum of 10-fluoro-3,3-bis(4-methoxyphenyl)-13,13-dimethyl-3,13-dihydrobenzo[*h*]indeno[2,1-*f*]chromene in CDCl<sub>3</sub>.

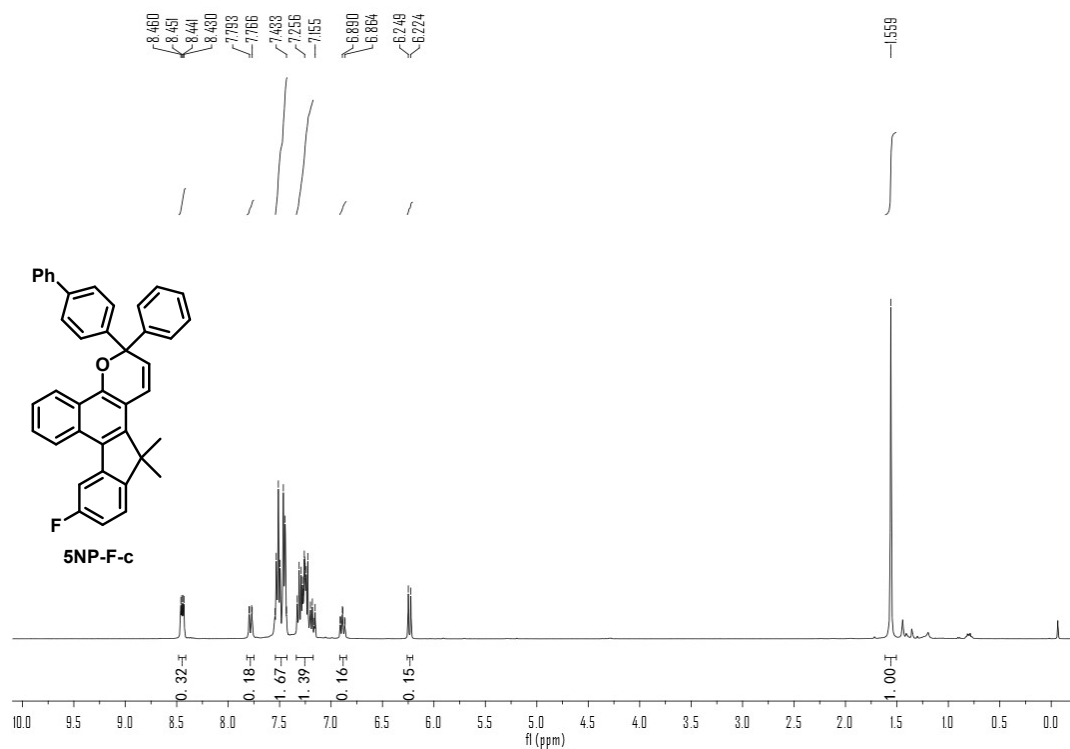

**Figure S25.** <sup>1</sup>H NMR spectrum of 3-([1,1'-biphenyl]-4-yl)-10-fluoro-13,13-dimethyl-3-phenyl-3,13-dihydrobenzo[h]indeno[2,1-f]chromene in CDCl<sub>3</sub>.

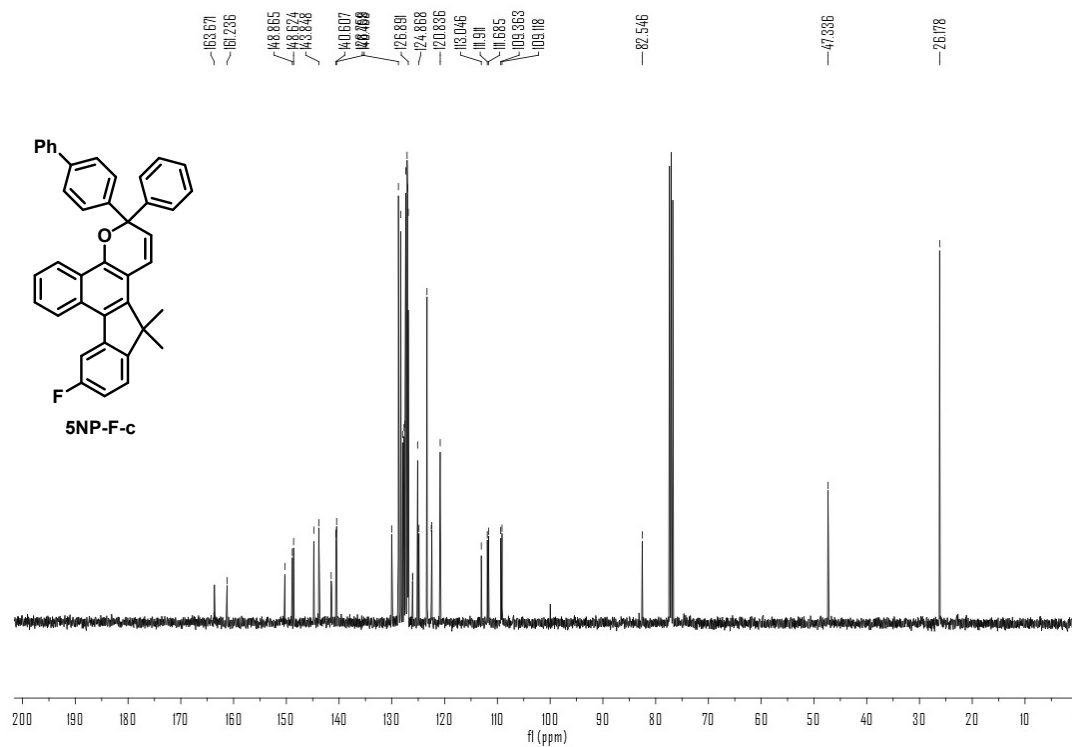

**Figure S26.** <sup>13</sup>C NMR spectrum of 3-([1,1'-biphenyl]-4-yl)-10-fluoro-13,13-dimethyl-3-phenyl-3,13-dihydrobenzo[h]indeno[2,1-f]chromene in CDCl<sub>3</sub>.

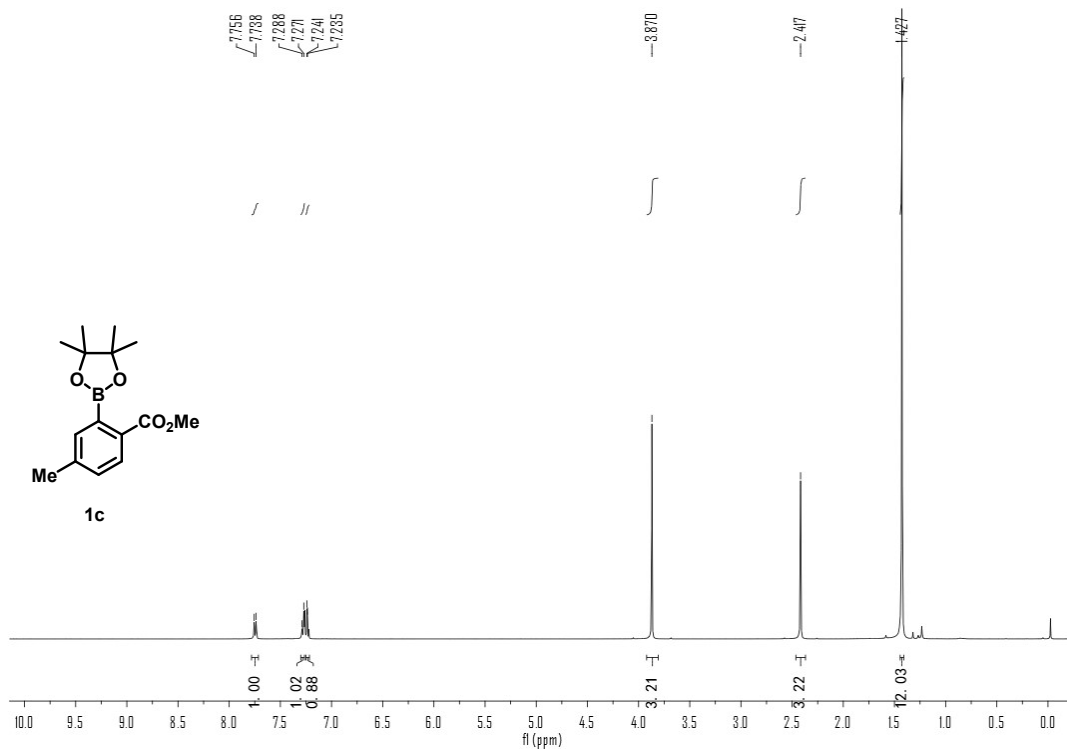

**Fig. S27.** <sup>1</sup>H NMR spectrum of methyl 4-methyl-2-(4,4,5,5-tetramethyl-1,3,2-dioxaborolan-2-yl)benzoate (**1c**) in CDCl<sub>3</sub>.

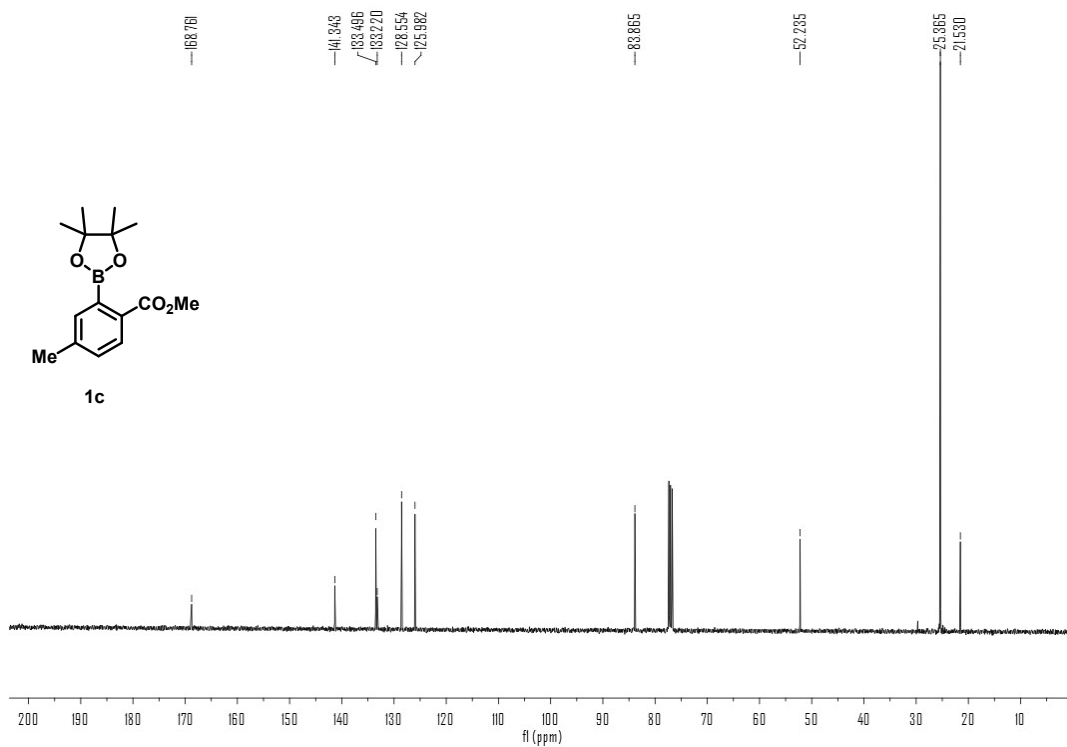

**Fig. S28.** <sup>13</sup>C NMR spectrum of methyl 4-methyl-2-(4,4,5,5-tetramethyl-1,3,2-dioxaborolan-2-yl)benzoate (**1c**) in CDCl<sub>3</sub>.

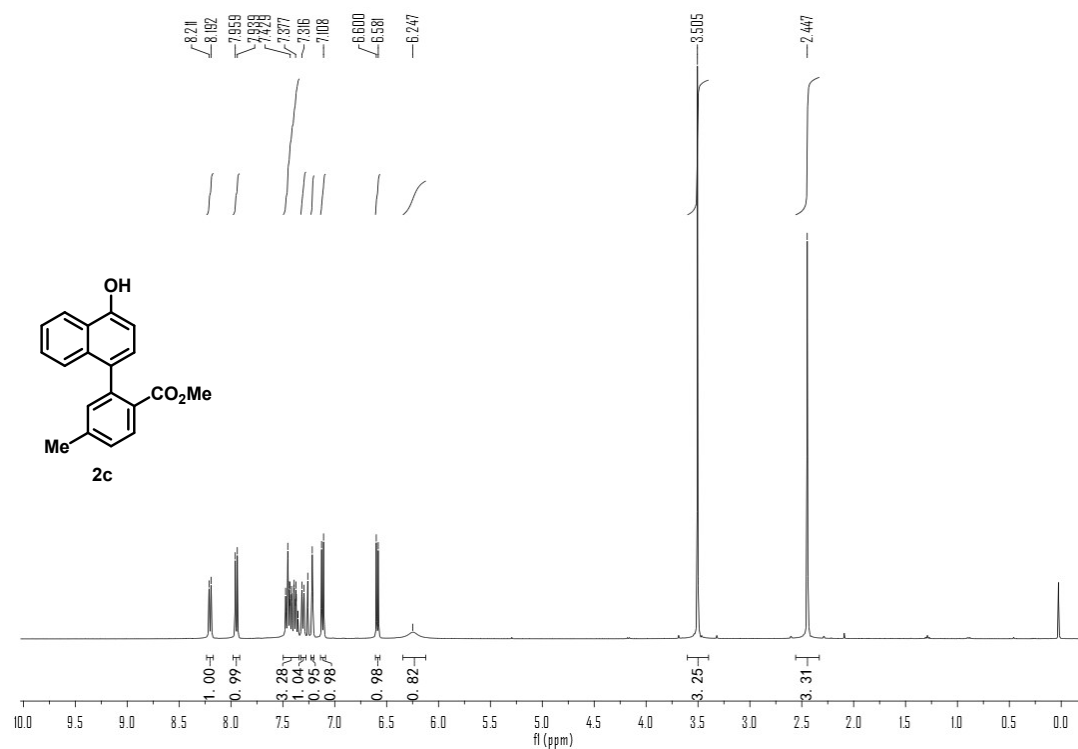

**Fig. S29.** <sup>1</sup>H NMR spectrum of **methyl 2-(4-hydroxynaphthalen-1-yl)-4-methylbenzoate (2c)** in CDCl<sub>3</sub>.

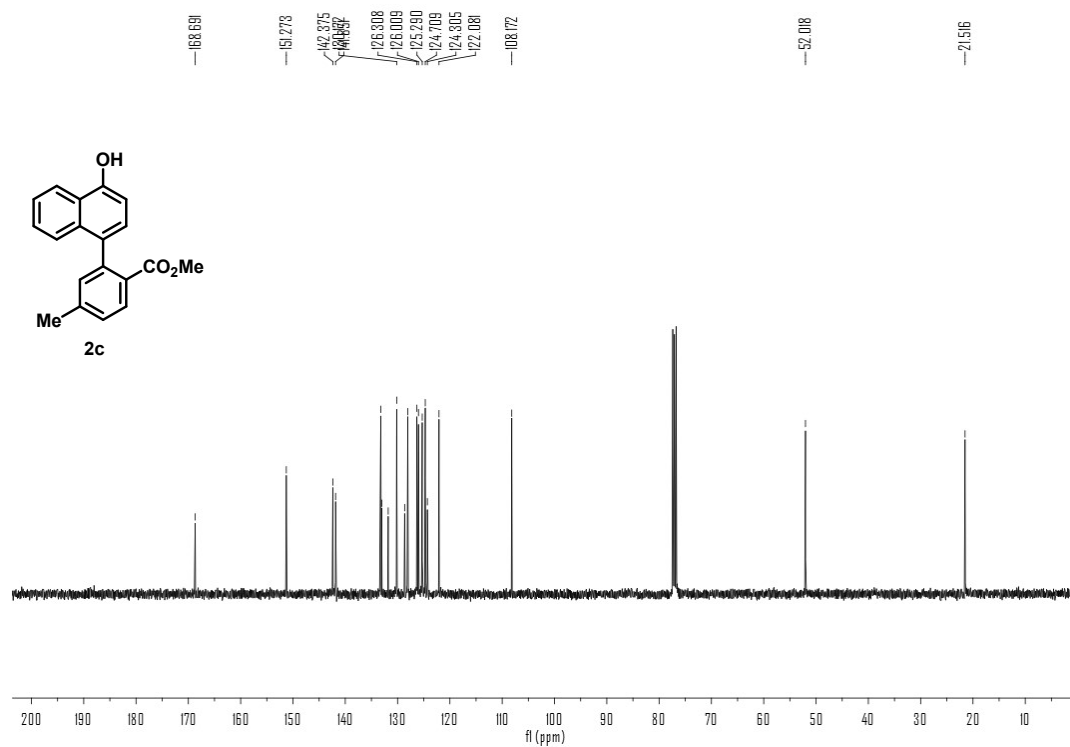

**Fig. S30.** <sup>13</sup>C NMR spectrum of **methyl 2-(4-hydroxynaphthalen-1-yl)-4-methylbenzoate (2c)** in CDCl<sub>3</sub>.



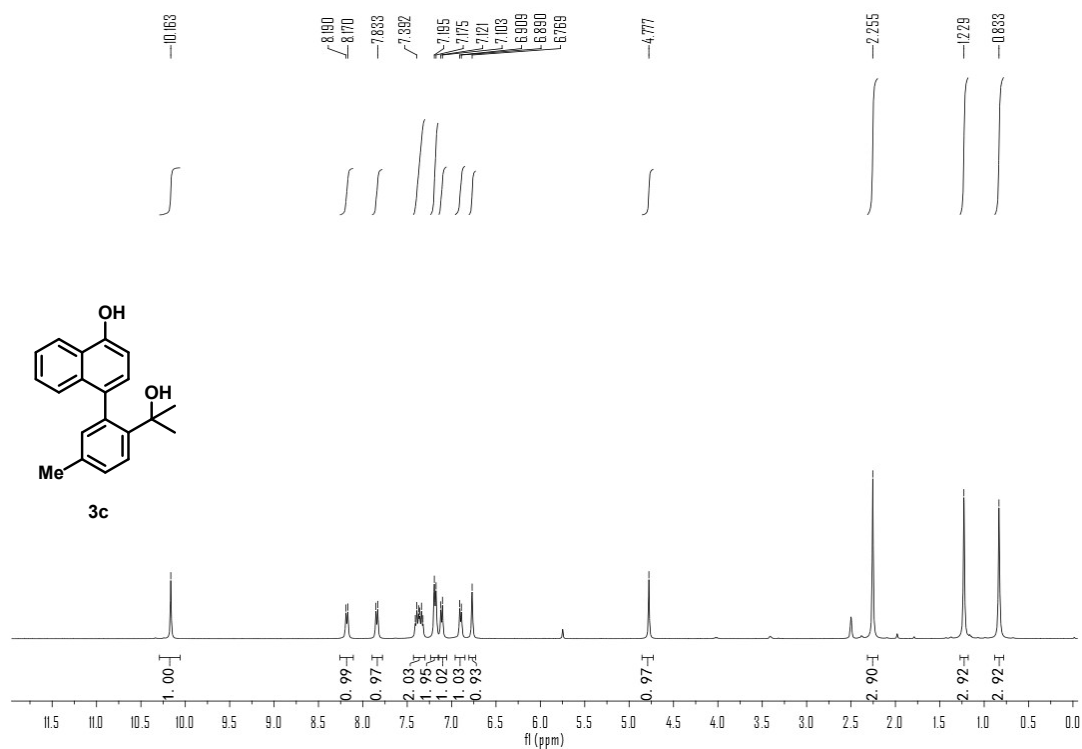

**Fig. S31.** <sup>1</sup>H NMR spectrum of 4-(2-(2-hydroxypropan-2-yl)-5-methylphenyl)naphthalen-1-ol (**3c**) in CDCl<sub>3</sub>.

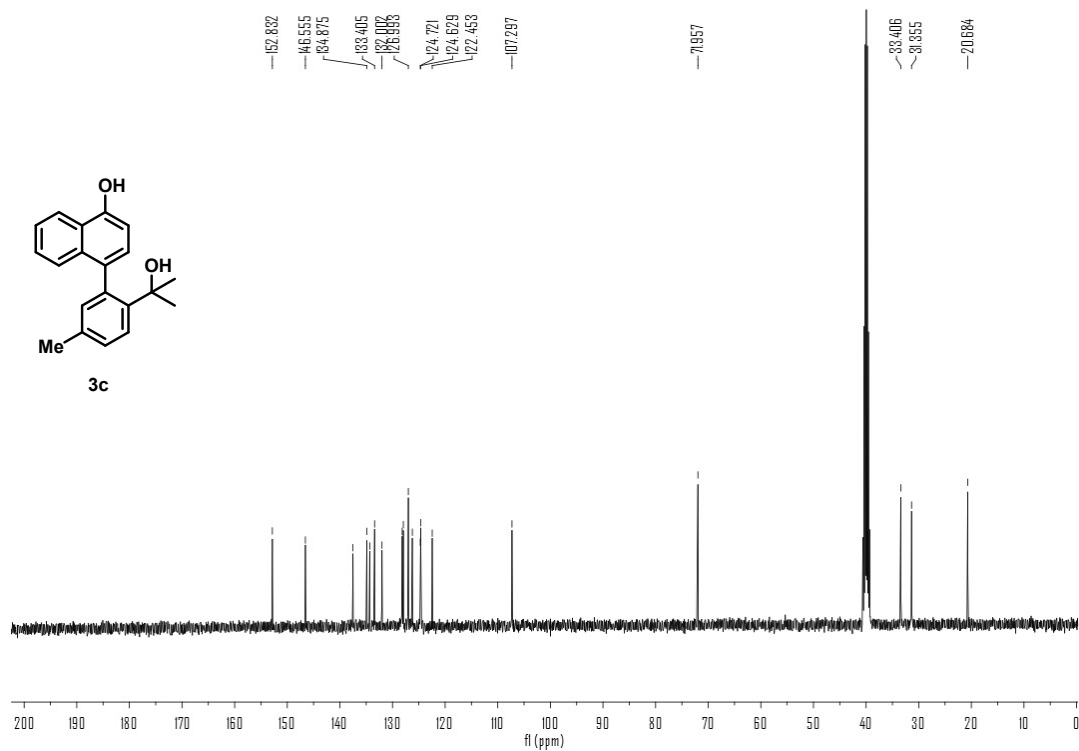

**Fig. S32.** <sup>13</sup>C NMR spectrum of 4-(2-(2-hydroxypropan-2-yl)-5-methylphenyl)naphthalen-1-ol (**3c**) in CDCl<sub>3</sub>.

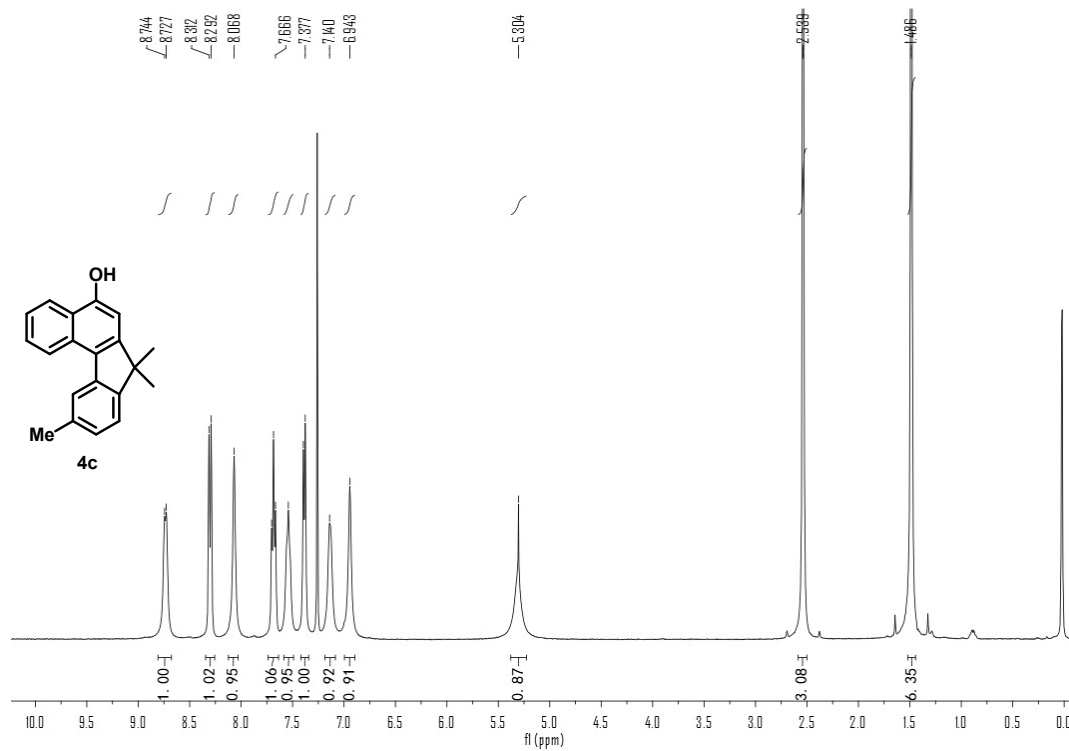

**Fig. S33.** <sup>1</sup>H NMR spectrum of 7,7,10-trimethyl-7H-benzo[c]fluoren-5-ol (4c) in CDCl<sub>3</sub>.

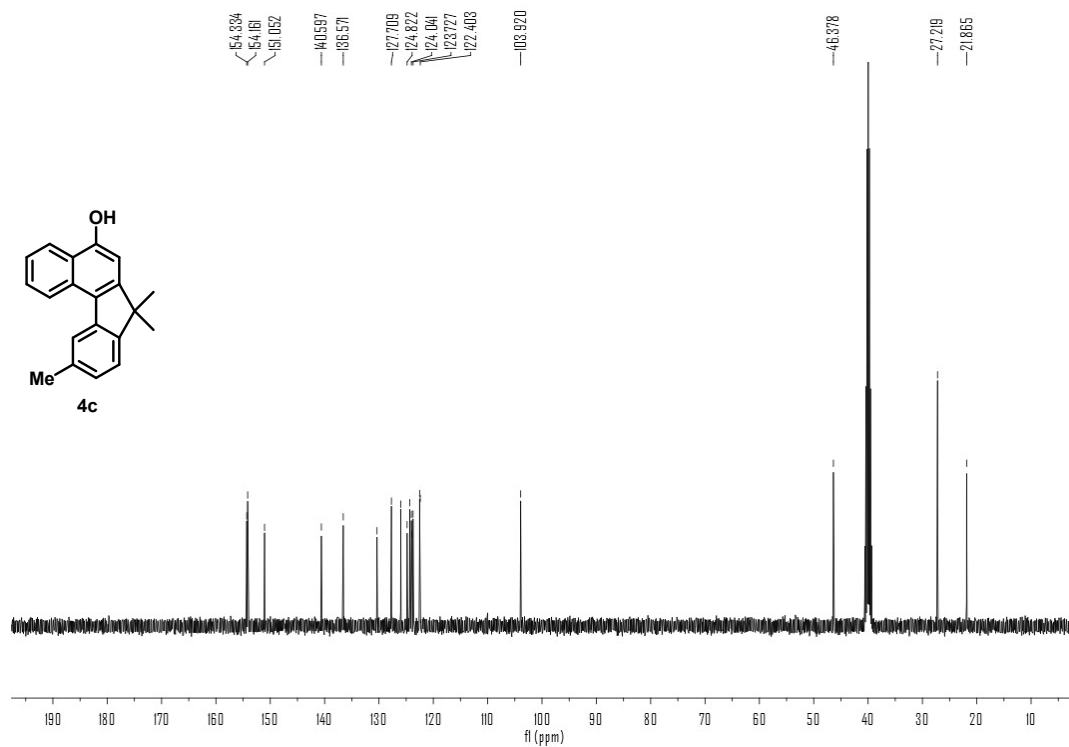

**Fig. S34.** <sup>13</sup>C NMR spectrum of 7,7,10-trimethyl-7H-benzo[c]fluoren-5-ol (4c) in CDCl<sub>3</sub>.

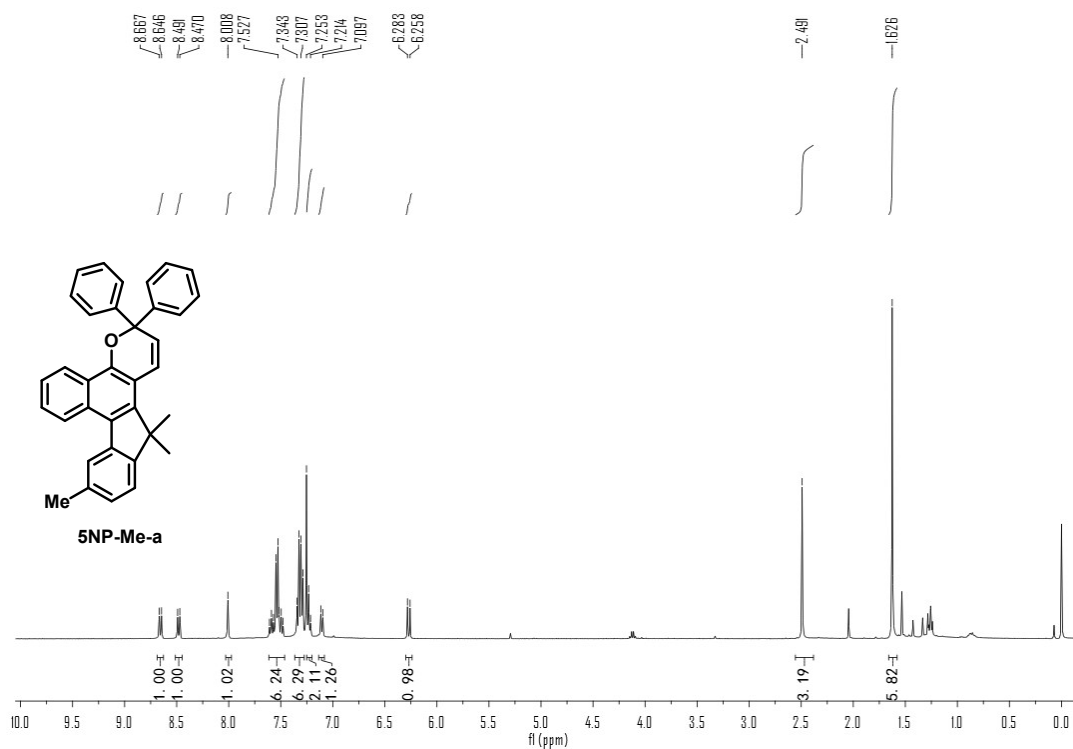

**Figure S35.** <sup>1</sup>H NMR spectrum of 10,13,13-trimethyl-3,3-diphenyl-3,13-dihydrobenzo[*h*]indeno[2,1-*f*]chromene in CDCl<sub>3</sub>.

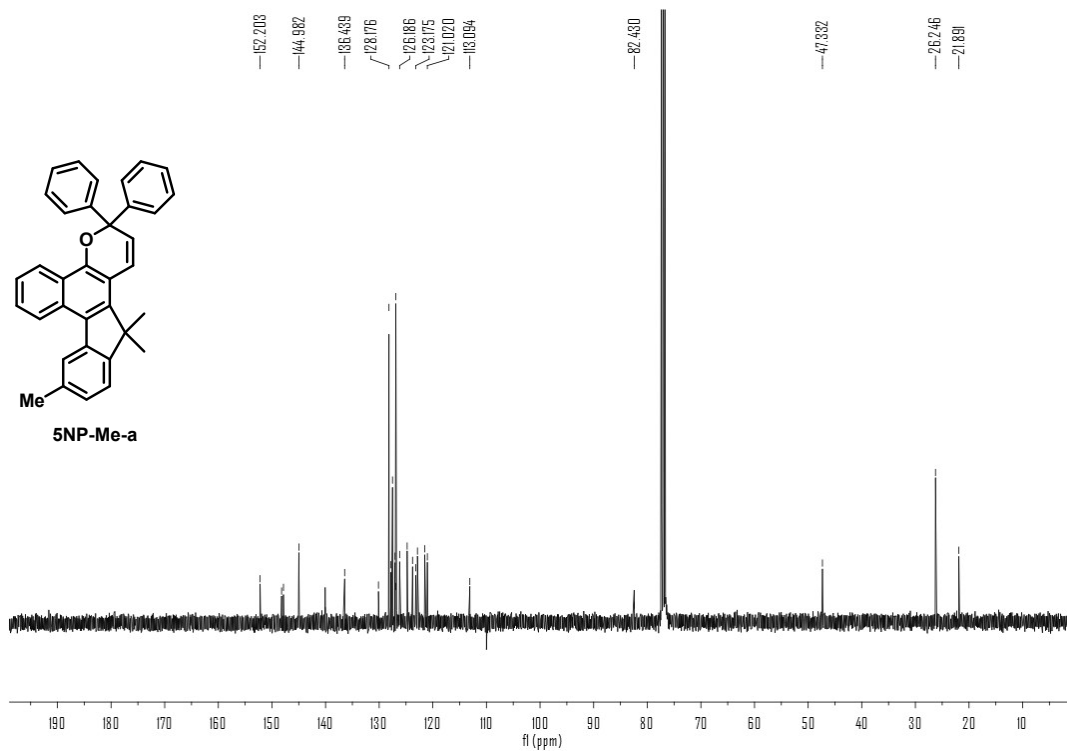

**Figure S36.** <sup>13</sup>C NMR spectrum of 10,13,13-trimethyl-3,3-diphenyl-3,13-dihydrobenzo[*h*]indeno[2,1-*f*]chromene in CDCl<sub>3</sub>.

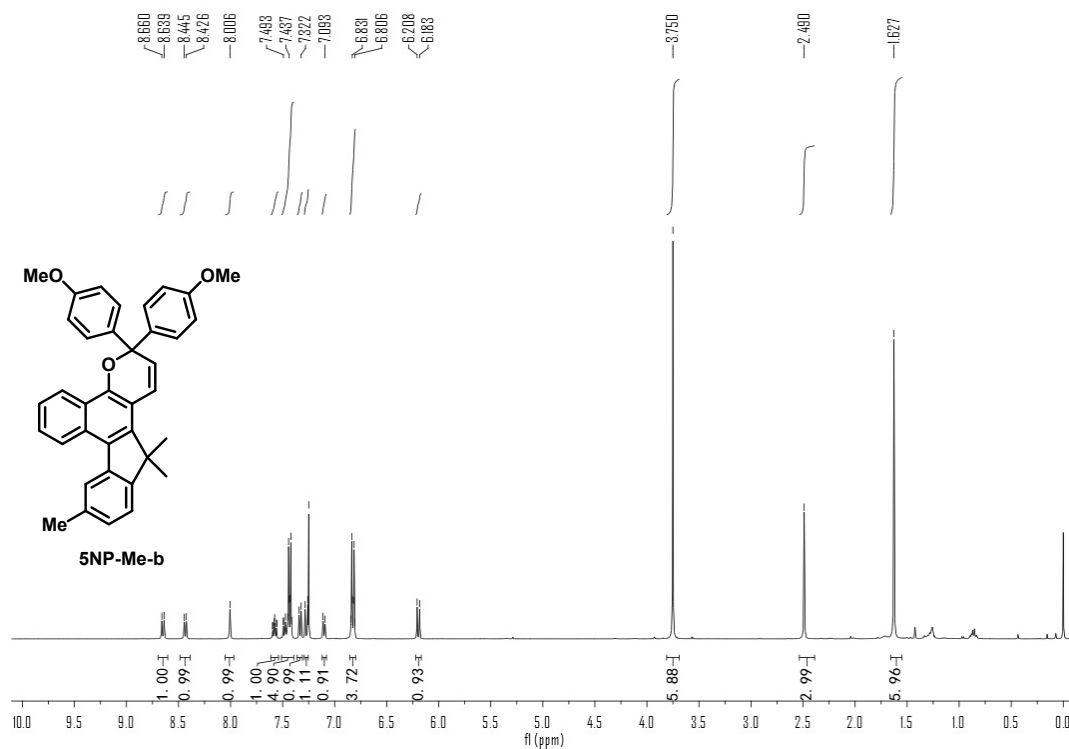

**Fig. S37.** <sup>1</sup>H NMR spectrum of 3,3-bis(4-methoxyphenyl)-10,13,13-trimethyl-3,13-dihydrobenzo[*h*]indeno[2,1-*f*]chromene in CDCl<sub>3</sub>.

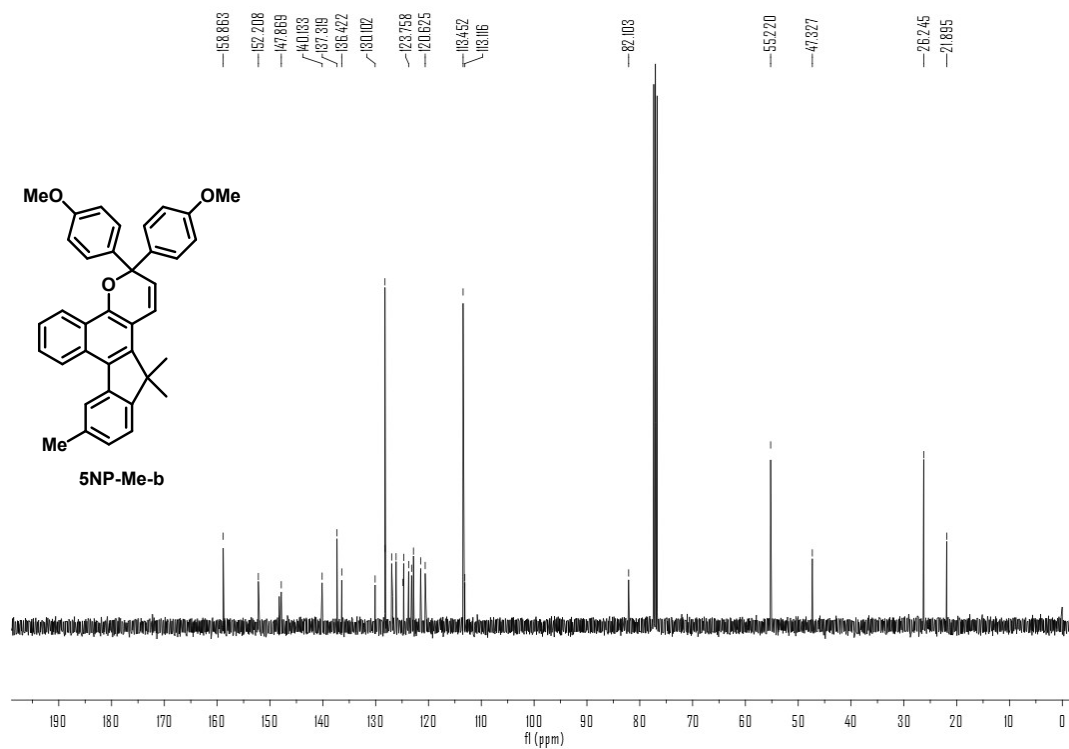

**Fig. S38.** <sup>13</sup>C NMR spectrum of 3,3-bis(4-methoxyphenyl)-10,13,13-trimethyl-3,13-dihydrobenzo[*h*]indeno[2,1-*f*]chromene in CDCl<sub>3</sub>.

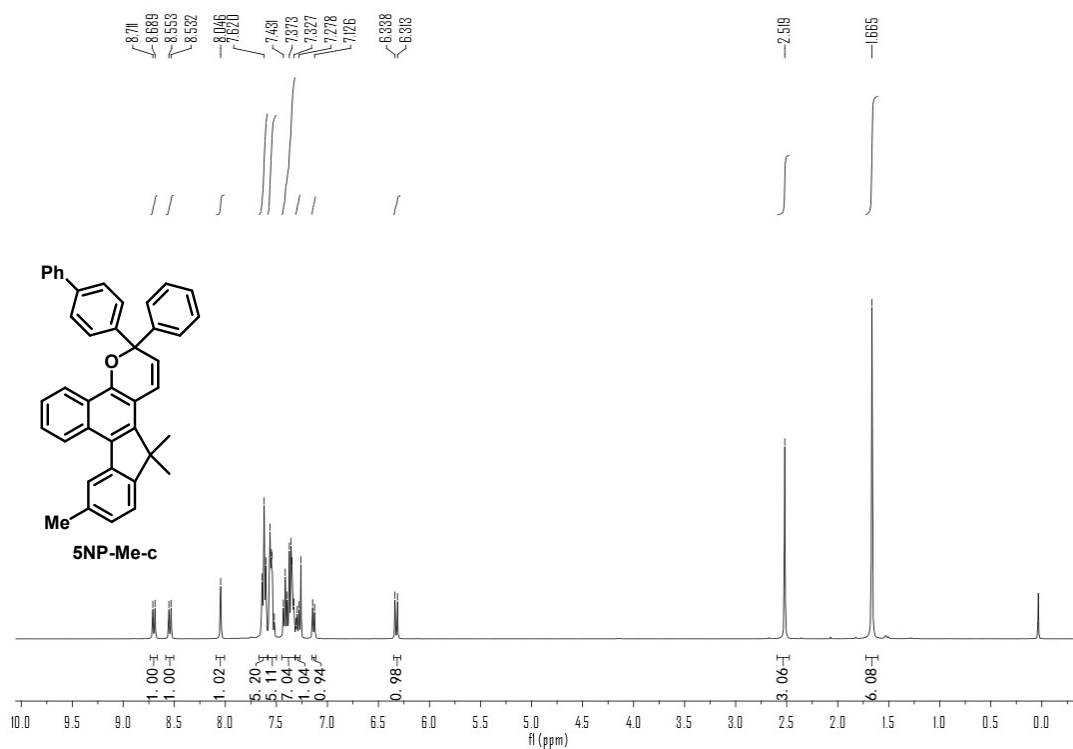

**Figure S39.** <sup>1</sup>H NMR spectrum of 3-([1,1'-biphenyl]-4-yl)-10,13,13-trimethyl-3-phenyl-3,13-dihydrobenzo[*h*]indeno[2,1-*f*]chromene in CDCl<sub>3</sub>.

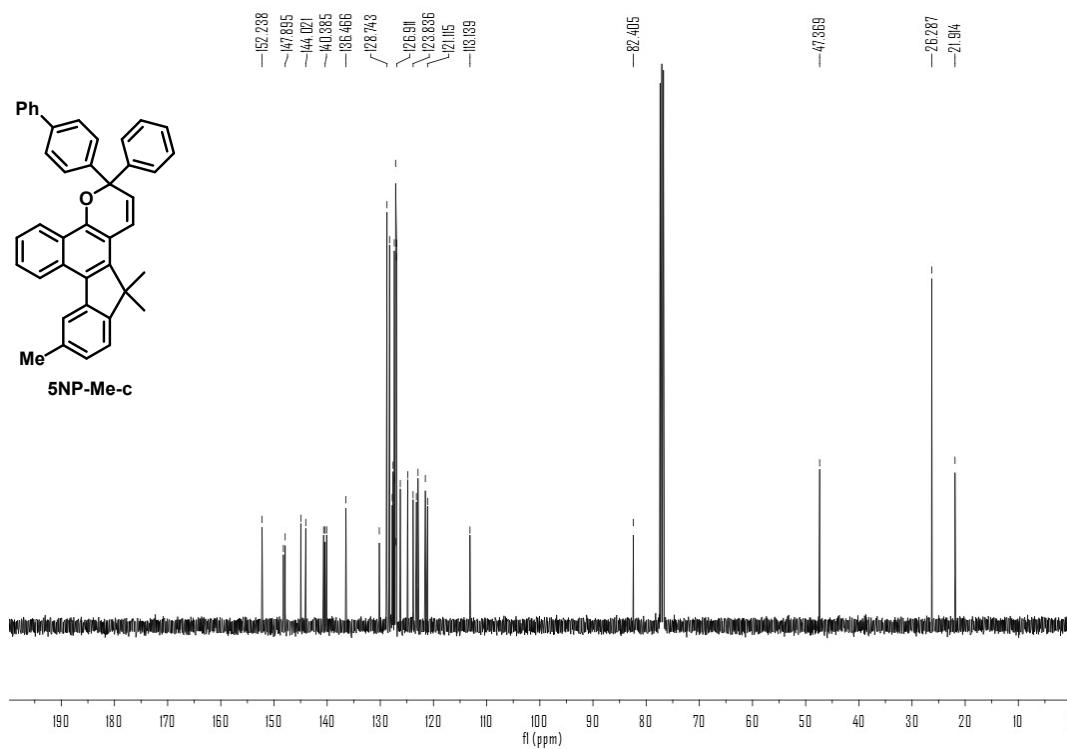

**Figure S40.** <sup>13</sup>C NMR spectrum of 3-([1,1'-biphenyl]-4-yl)-10,13,13-trimethyl-3-phenyl-3,13-dihydrobenzo[*h*]indeno[2,1-*f*]chromene in CDCl<sub>3</sub>.

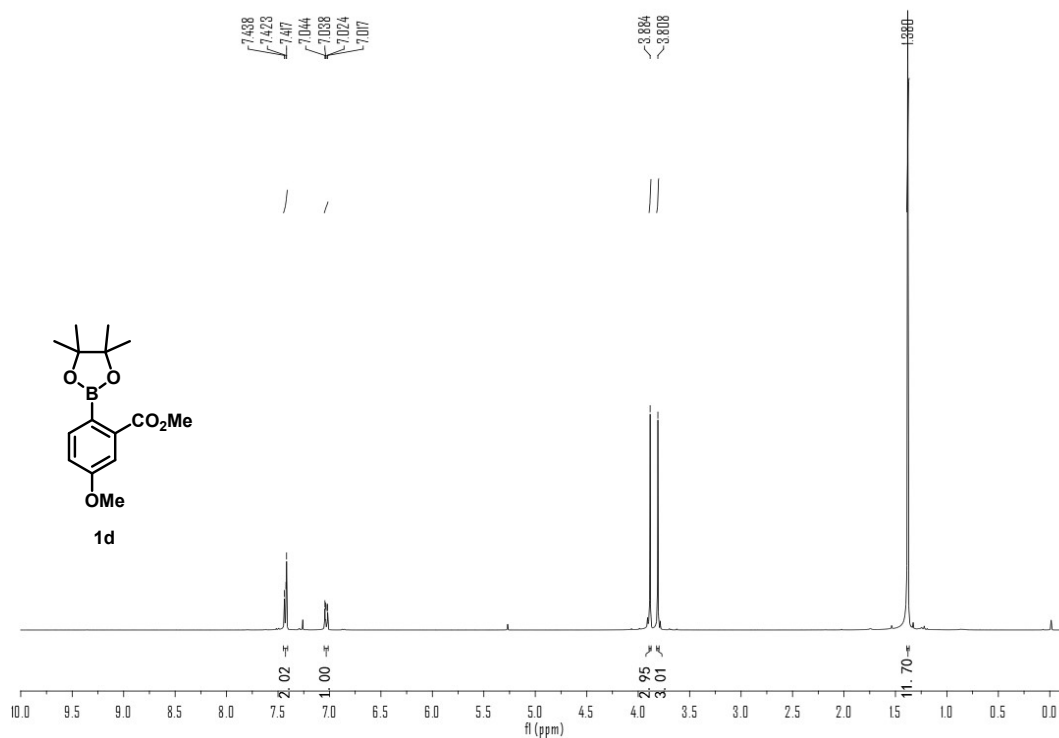

**Fig. S41.** <sup>1</sup>H NMR spectrum of methyl 5-methoxy-2-(4,4,5,5-tetramethyl-1,3,2-dioxaborolan-2-yl)benzoate (**1d**) in CDCl<sub>3</sub>.

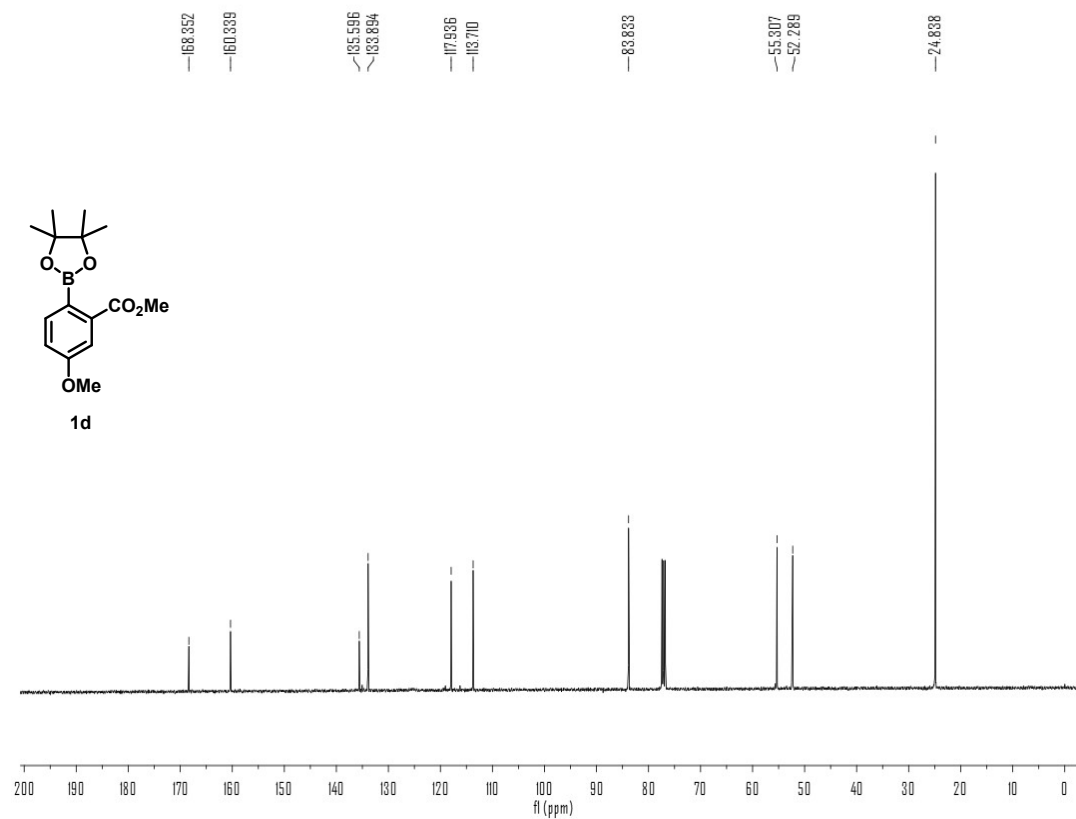

**Fig. S42.** <sup>13</sup>C NMR spectrum of methyl 5-methoxy-2-(4,4,5,5-tetramethyl-1,3,2-dioxaborolan-2-yl)benzoate (**1d**) in CDCl<sub>3</sub>.

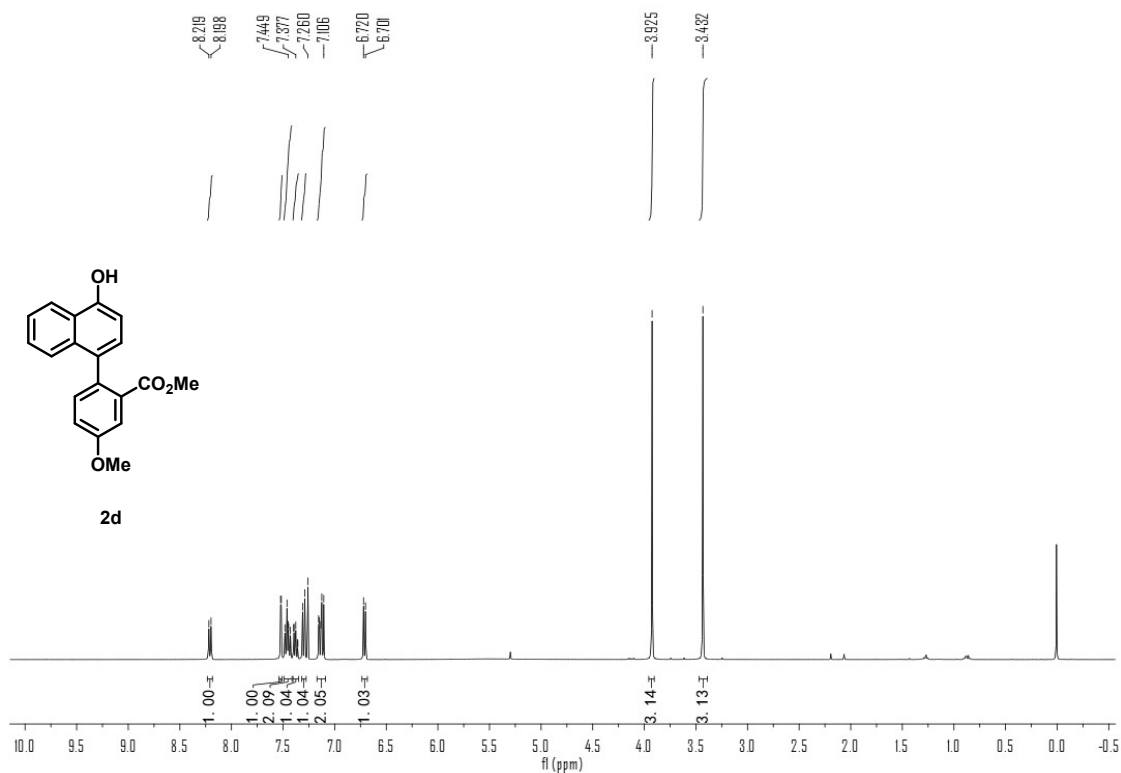

**Fig. S43.** <sup>1</sup>H NMR spectrum of **4-(2-(2-hydroxypropan-2-yl)-4-methoxyphenyl)naphthalen-1-ol (2d)** in CDCl<sub>3</sub>.

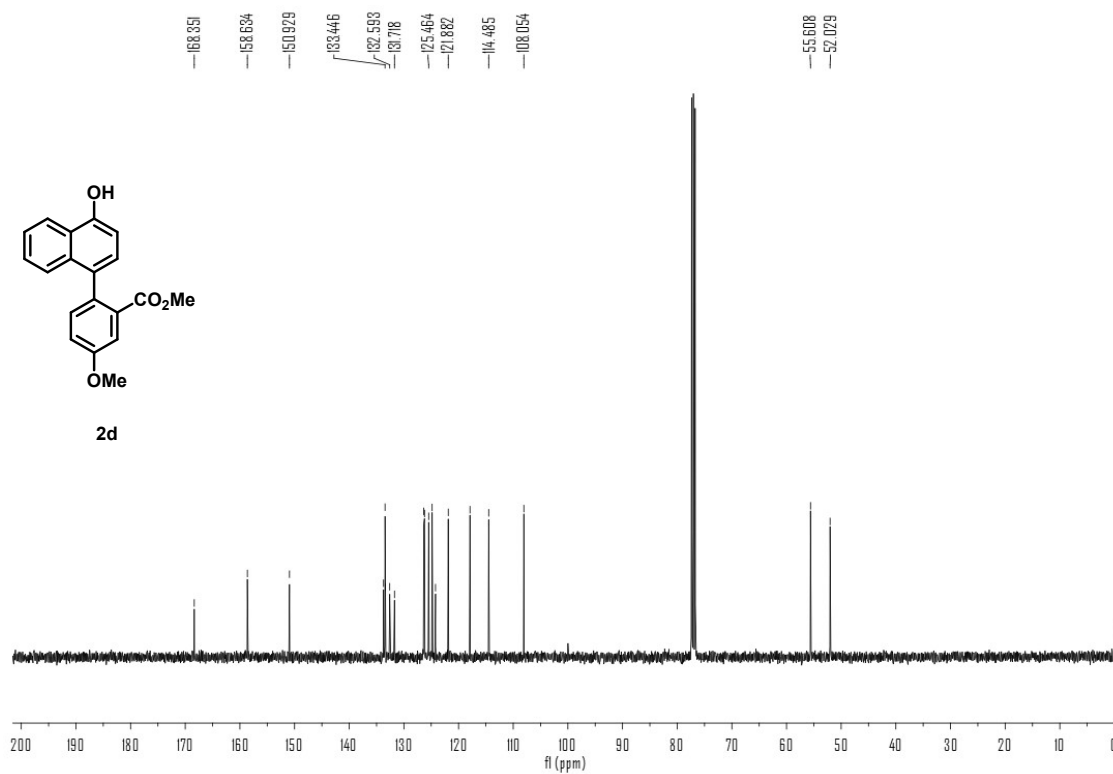

**Fig. S44.** <sup>13</sup>C NMR spectrum of **4-(2-(2-hydroxypropan-2-yl)-4-methoxyphenyl)naphthalen-1-ol (2d)** in CDCl<sub>3</sub>.

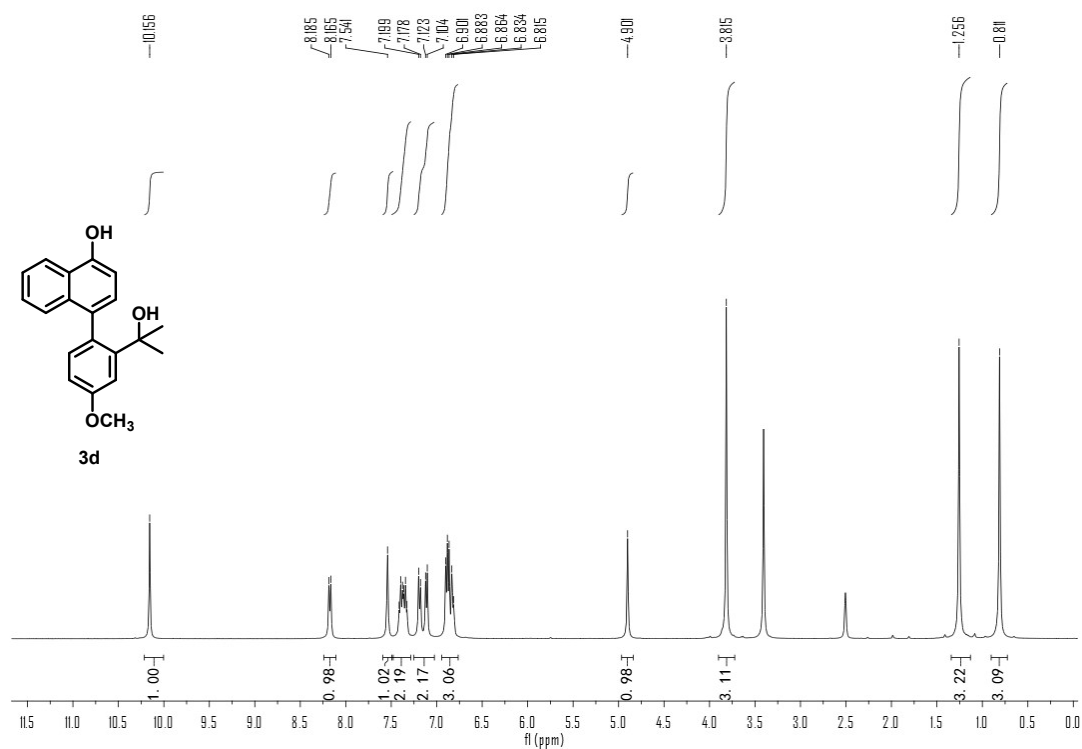

**Fig. S45.** <sup>1</sup>H NMR spectrum of 4-(2-(2-hydroxypropan-2-yl)-4-methoxyphenyl)naphthalen-1-ol (**3d**) in DMSO-*d*<sub>6</sub>.

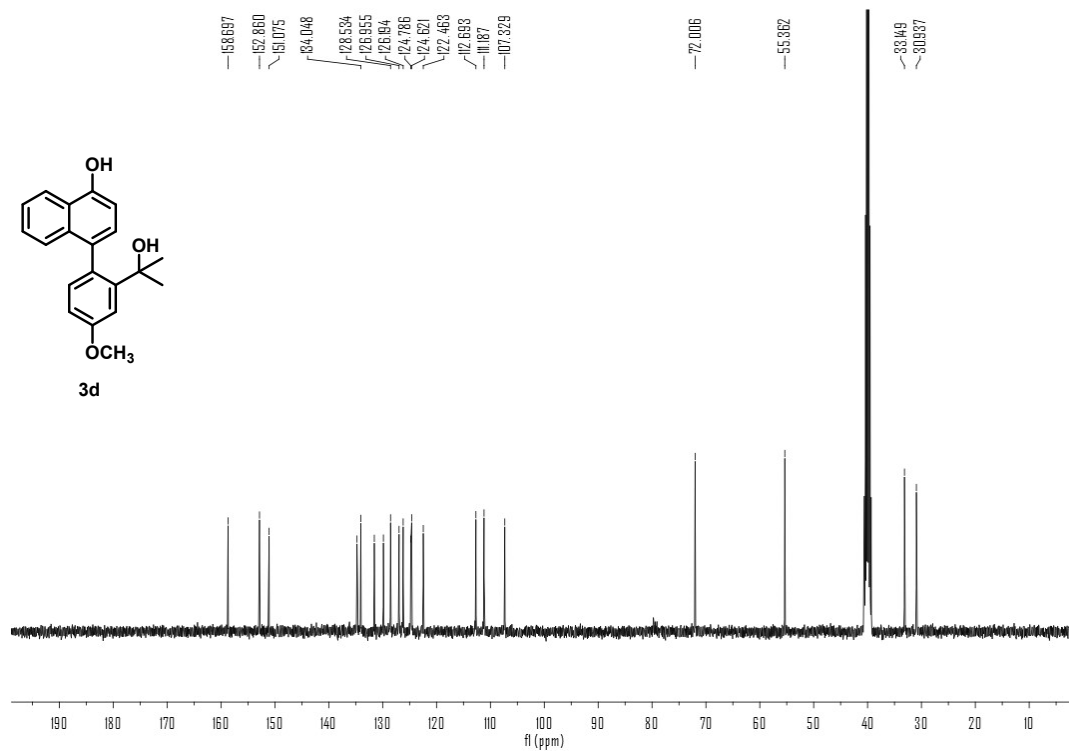

**Fig. S46.** <sup>13</sup>C NMR spectrum of 4-(2-(2-hydroxypropan-2-yl)-4-methoxyphenyl)naphthalen-1-ol (**3d**) in DMSO-*d*<sub>6</sub>.



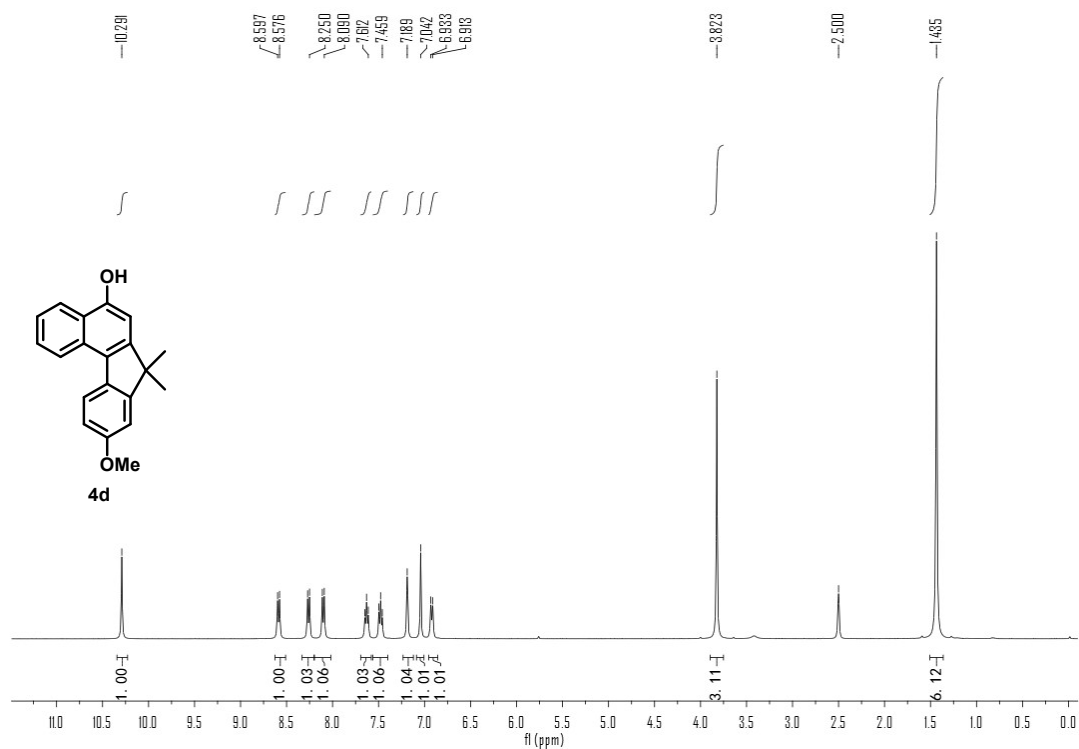

**Fig. S47.** <sup>1</sup>H NMR spectrum of **9-methoxy-7,7-dimethyl-7H-benzo[c]fluoren-5-ol (4d)** in DMSO-*d*<sub>6</sub>.

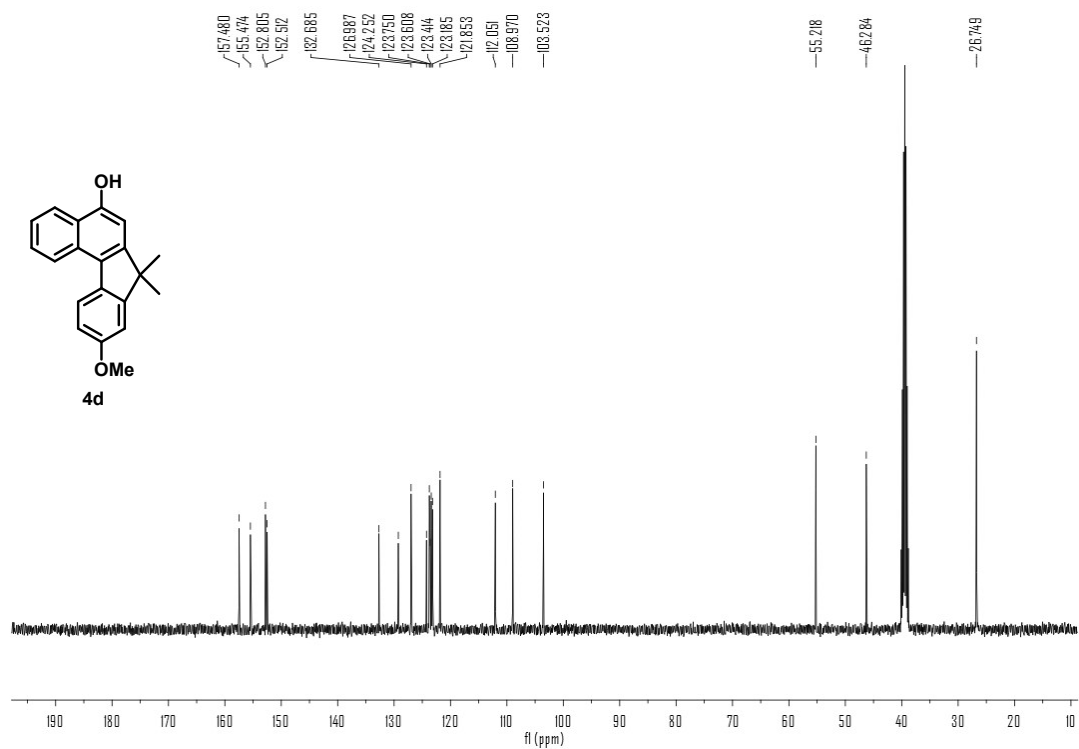

**Fig. S48.** <sup>13</sup>C NMR spectrum of **9-methoxy-7,7-dimethyl-7H-benzo[c]fluoren-5-ol (4d)** in DMSO-*d*<sub>6</sub>.

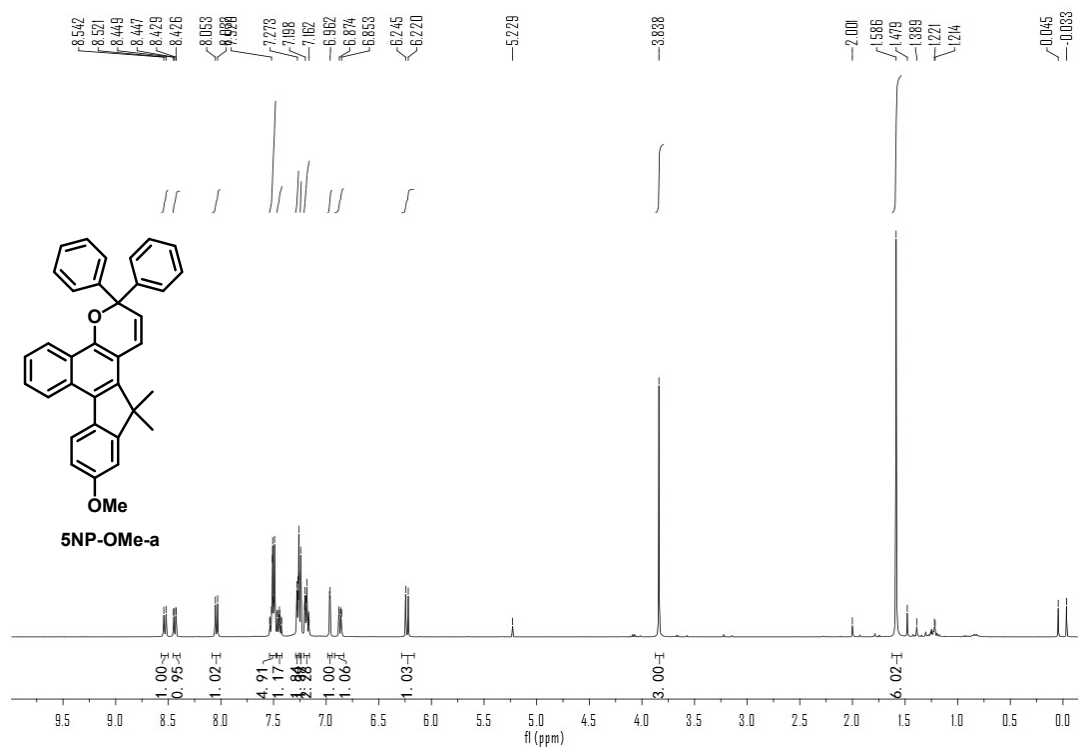

**Figure S49.** <sup>1</sup>H NMR spectrum of 11-methoxy-13,13-dimethyl-3,3-diphenyl-3,13-dihydrobenzo[*h*]indeno[2,1-*f*]chromene in CDCl<sub>3</sub>.

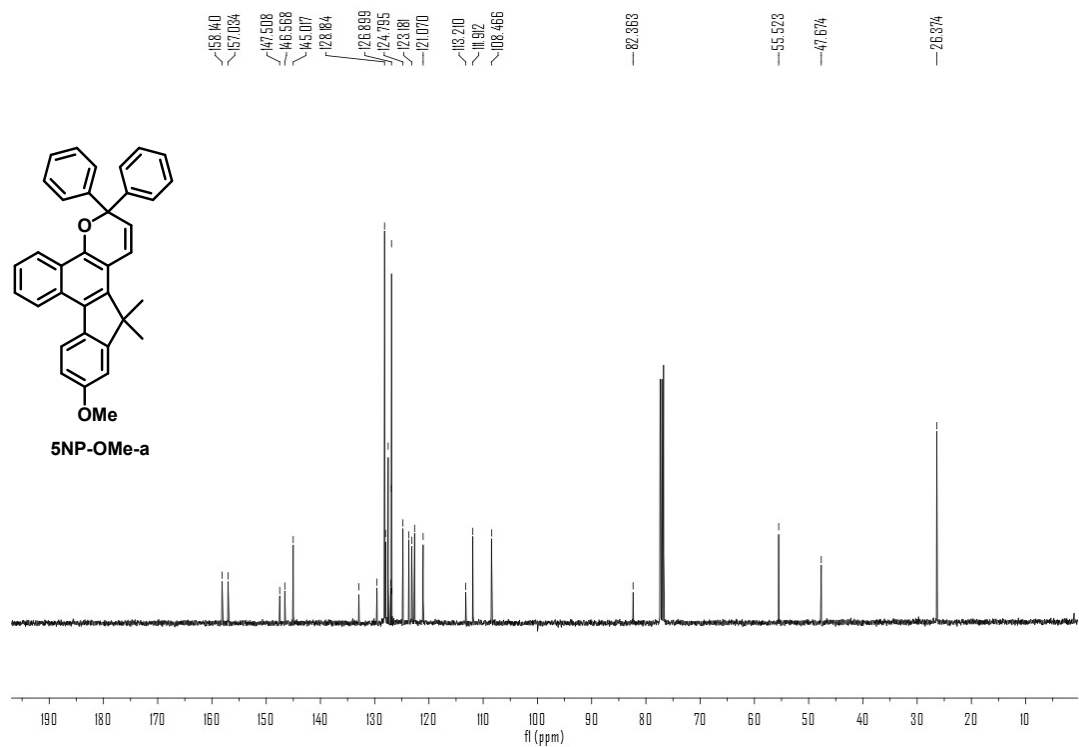

**Figure S50.** <sup>13</sup>C NMR spectrum of 11-methoxy-13,13-dimethyl-3,3-diphenyl-3,13-dihydrobenzo[*h*]indeno[2,1-*f*]chromene in CDCl<sub>3</sub>.

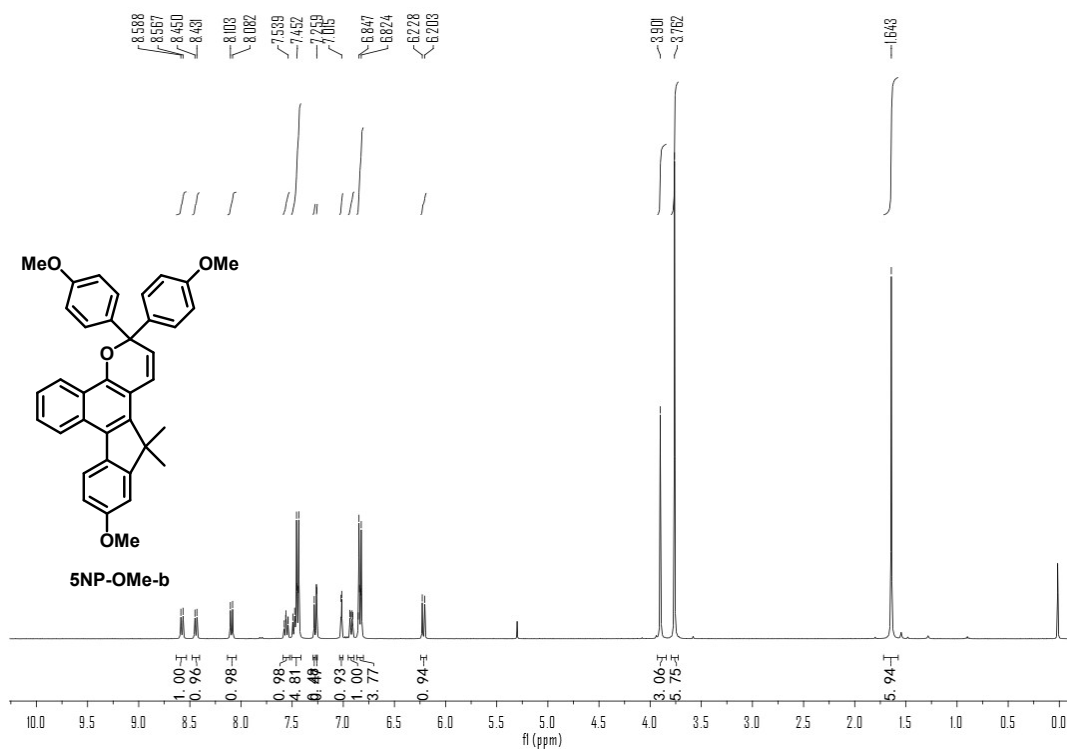

**Fig. S51.** <sup>1</sup>H NMR spectrum of 11-methoxy-3,3-bis(4-methoxyphenyl)-13,13-dimethyl-3,13-dihydrobenzo[h]indeno[2,1-f]chromene in CDCl<sub>3</sub>.

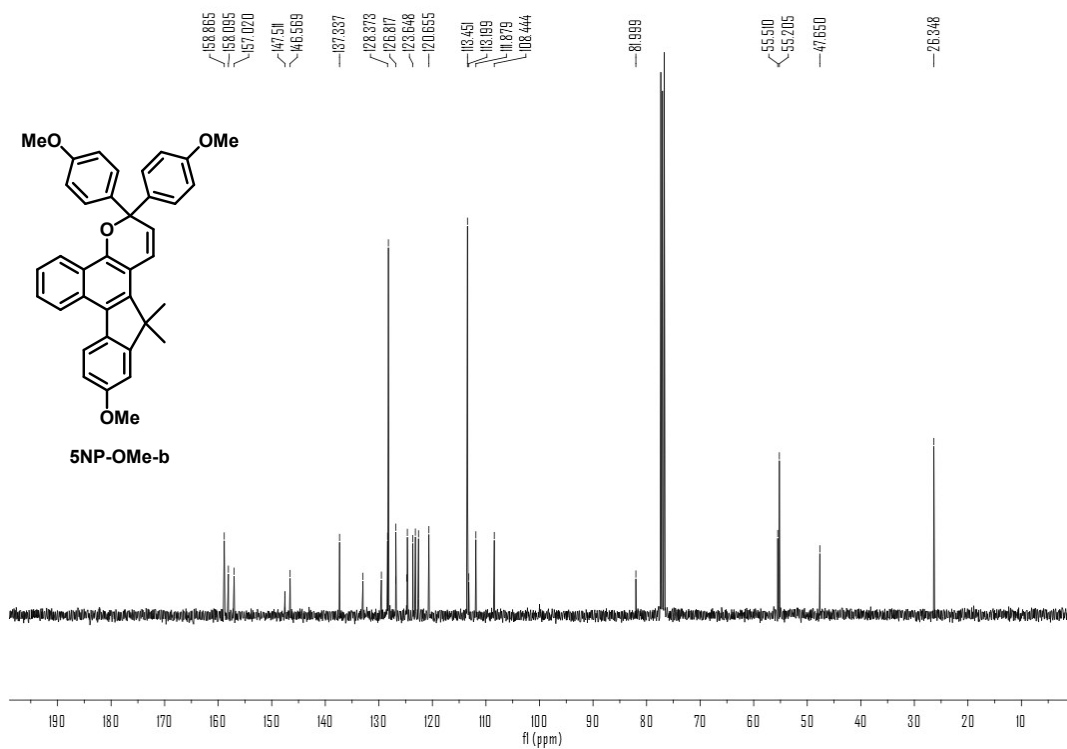

**Fig. S52.** <sup>13</sup>C NMR spectrum of 11-methoxy-3,3-bis(4-methoxyphenyl)-13,13-dimethyl-3,13-dihydrobenzo[h]indeno[2,1-f]chromene in CDCl<sub>3</sub>.

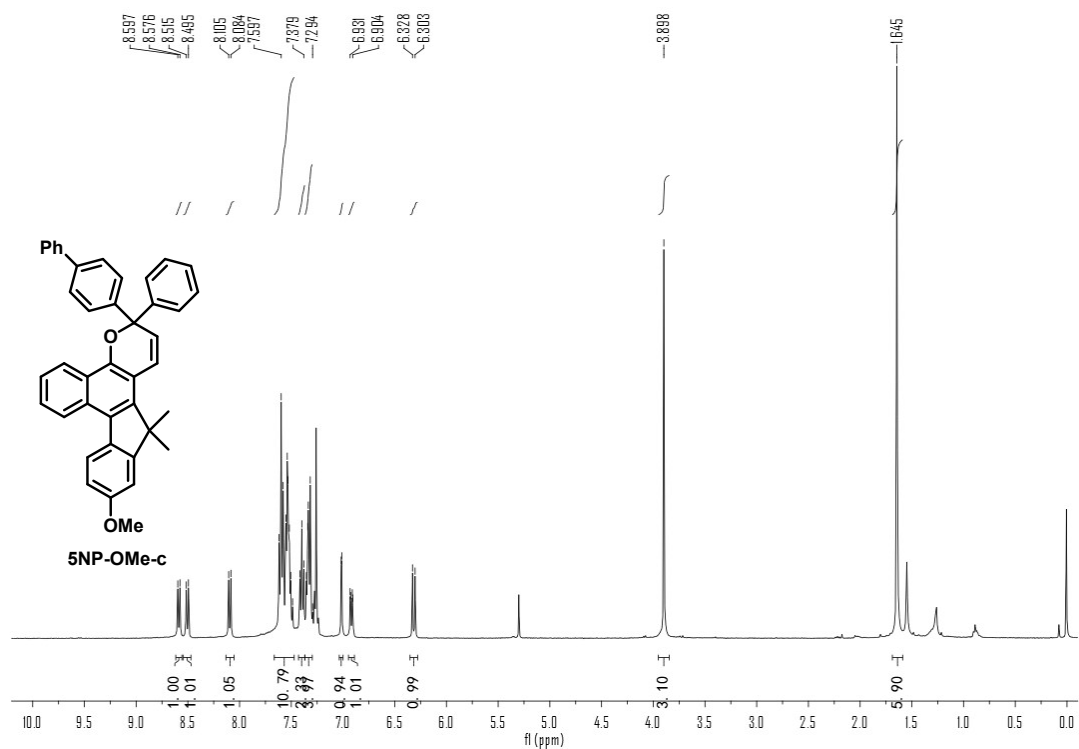

**Figure S53.**  $^1\text{H}$  NMR spectrum of 3-([1,1'-biphenyl]-4-yl)-11-methoxy-13,13-dimethyl-3-phenyl-3,13-dihydrobenzo[*h*]indeno[2,1-*f*]chromene in  $\text{CDCl}_3$ .

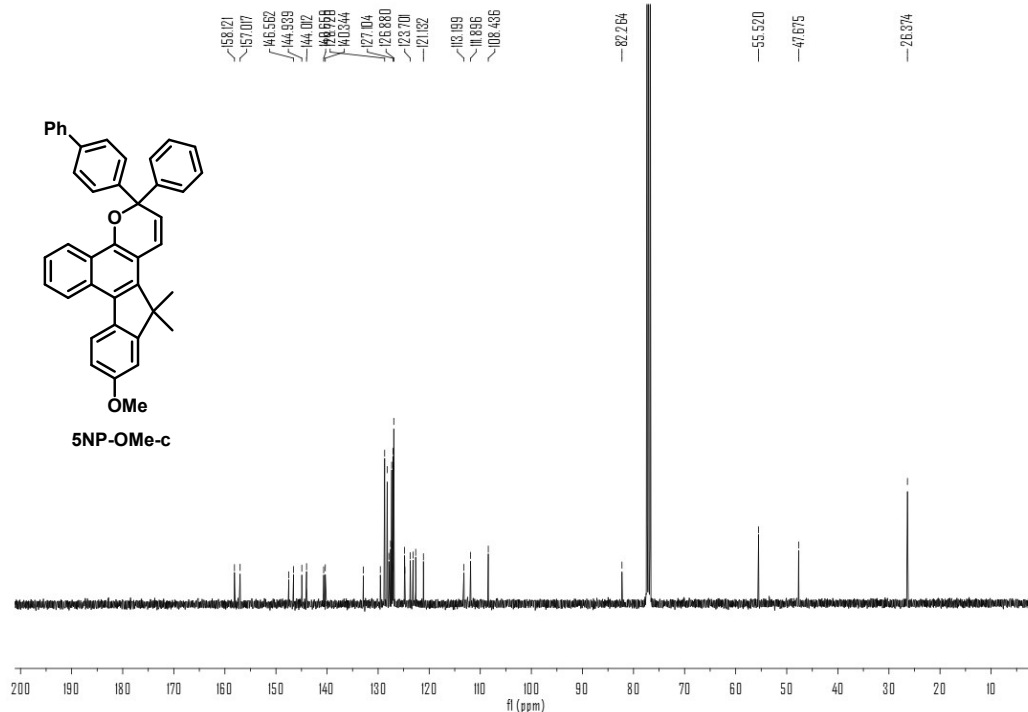

**Figure S54.**  $^{13}\text{C}$  NMR spectrum of 3-([1,1'-biphenyl]-4-yl)-11-methoxy-13,13-dimethyl-3-phenyl-3,13-dihydrobenzo[*h*]indeno[2,1-*f*]chromene in  $\text{CDCl}_3$ .

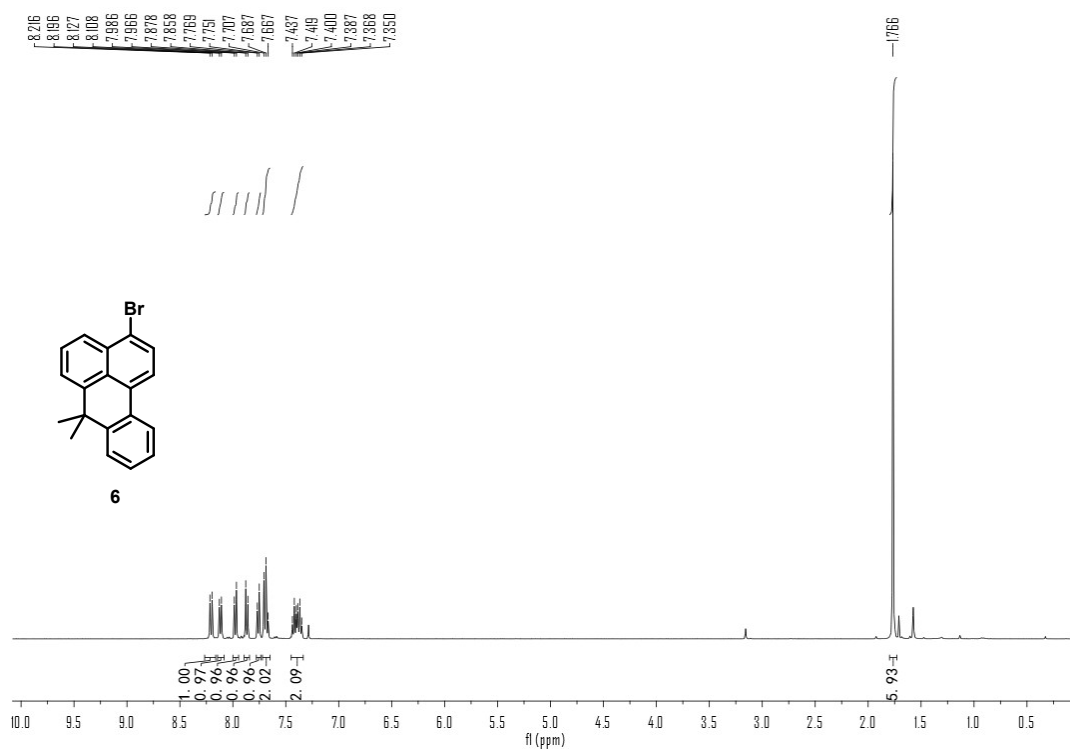

**Fig. S55.** <sup>1</sup>H NMR spectrum of 3-bromo-7,7-dimethyl-7H-benzo[de]anthracene (6) in CDCl<sub>3</sub>.

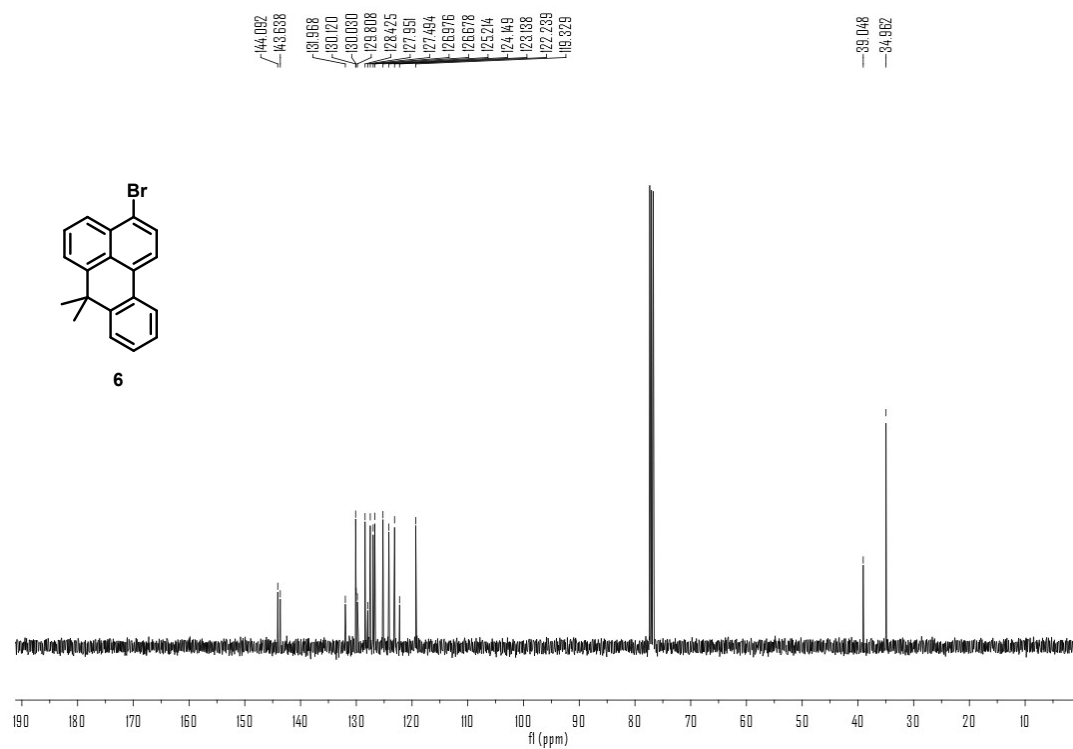

**Fig. S56.** <sup>13</sup>C NMR spectrum of 3-bromo-7,7-dimethyl-7H-benzo[de]anthracene (6) in CDCl<sub>3</sub>.

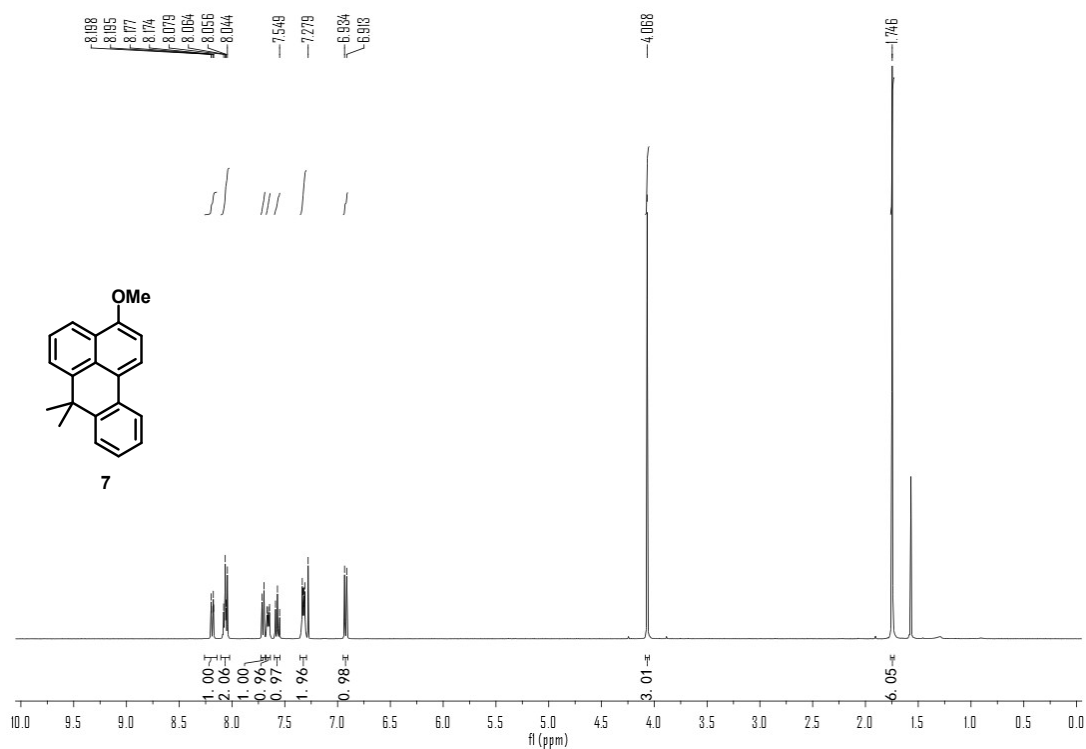

**Fig. S57.** <sup>1</sup>H NMR spectrum of 3-methoxy-7,7-dimethyl-7H-benzo[de] anthracene (7) in CDCl<sub>3</sub>.

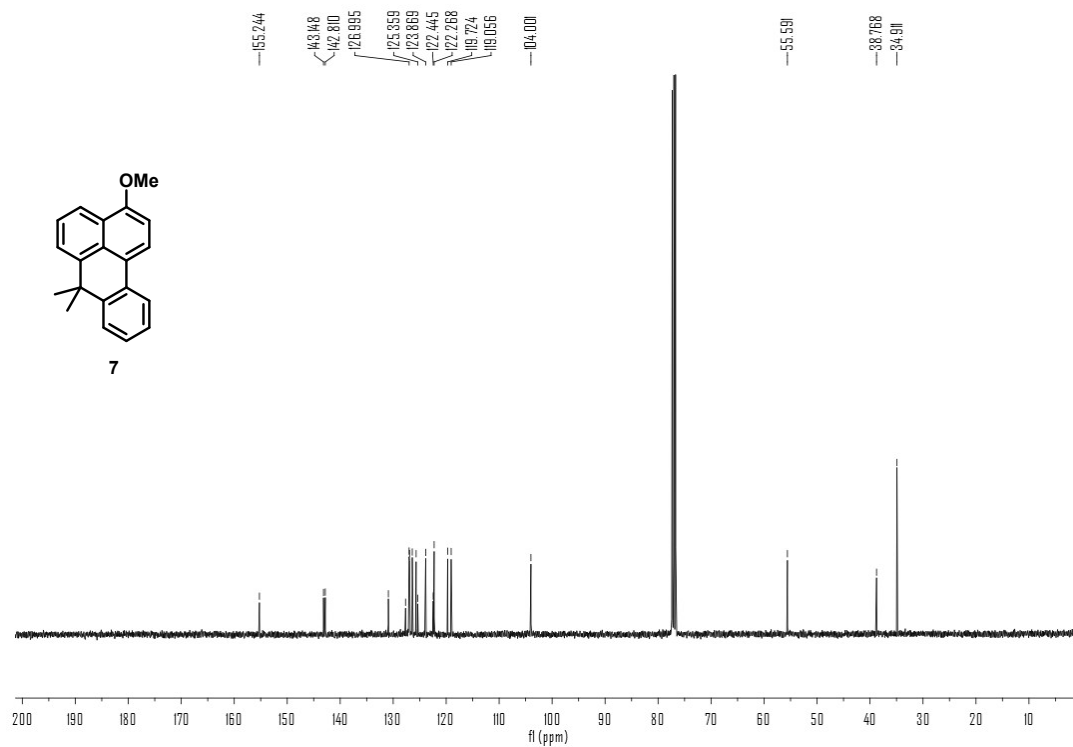

**Fig. S58.** <sup>13</sup>C NMR spectrum of 3-methoxy-7,7-dimethyl-7H-benzo[de] anthracene (7) in CDCl<sub>3</sub>.

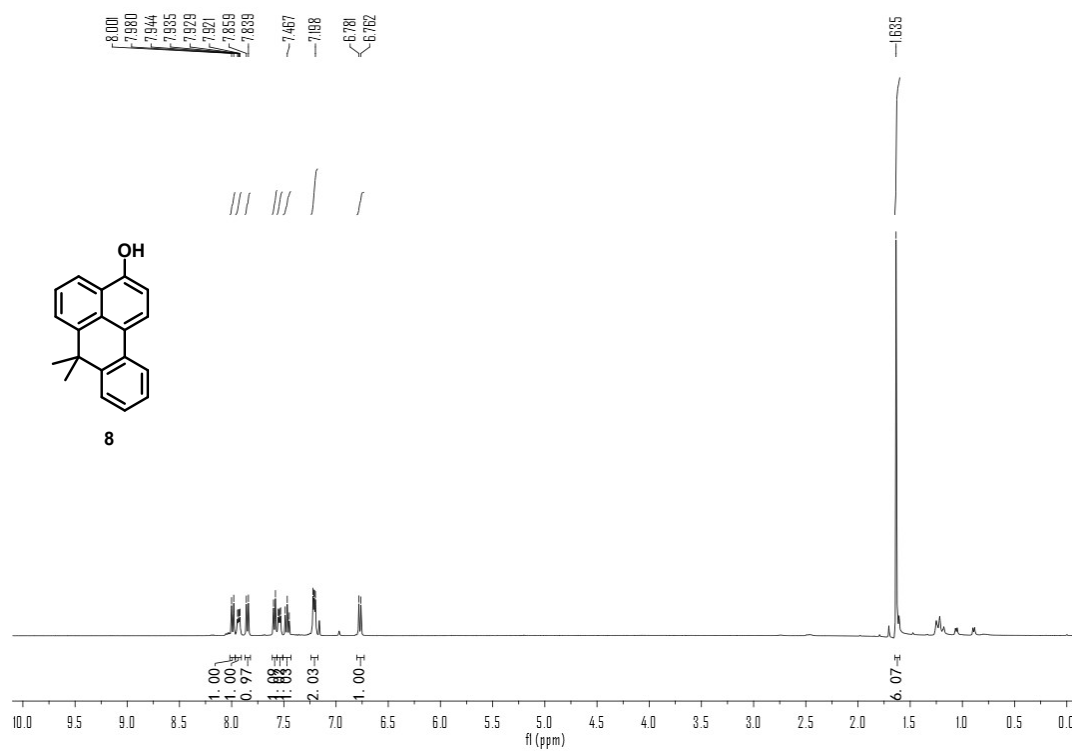

**Fig. S59.** <sup>1</sup>H NMR spectrum of 7,7-dimethyl-7H-benzo[de]anthracen-3-ol (8) in CDCl<sub>3</sub>.

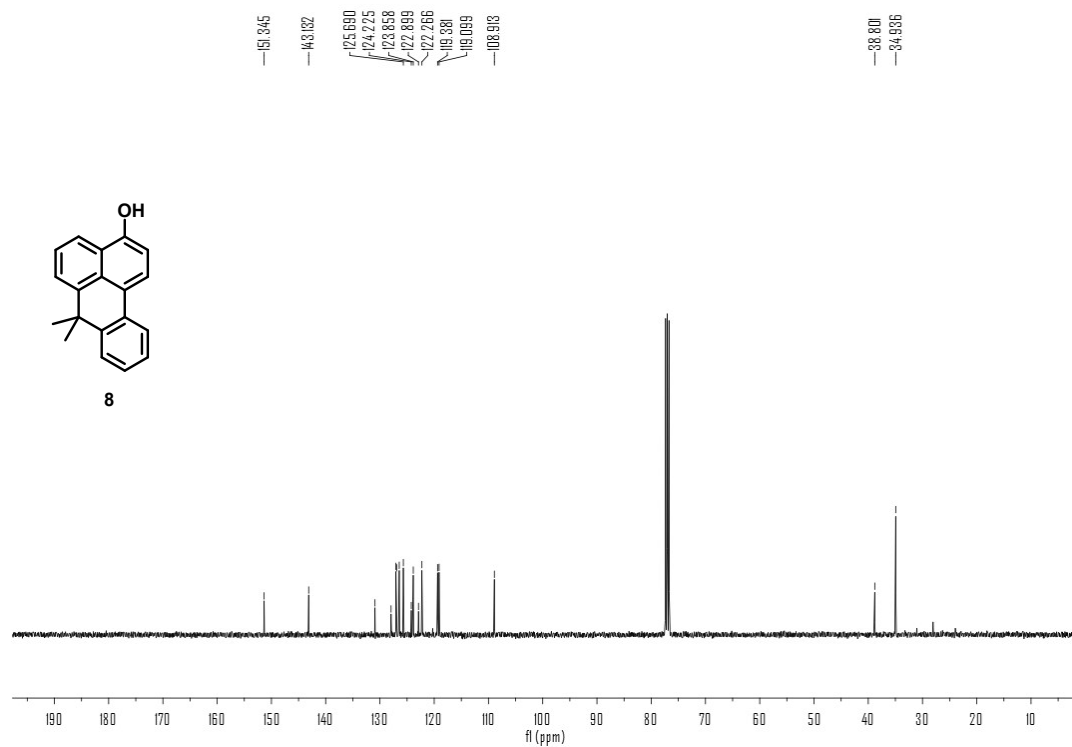

**Fig. S60.** <sup>13</sup>C NMR spectrum of 7,7-dimethyl-7H-benzo[de]anthracen-3-ol (8) in CDCl<sub>3</sub>.

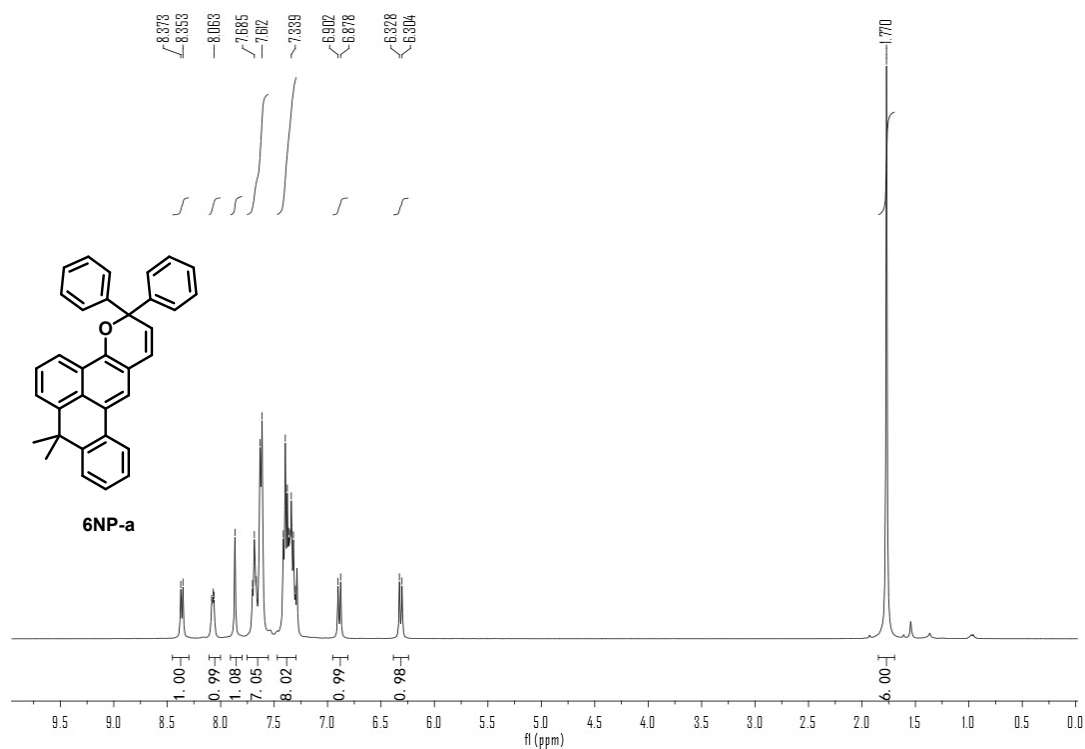

**Fig. S61.** <sup>1</sup>H NMR spectrum of 8,8-dimethyl-3,3-diphenyl-3,8-dihydroanthra [9,1-*gh*]chromene in CDCl<sub>3</sub>.

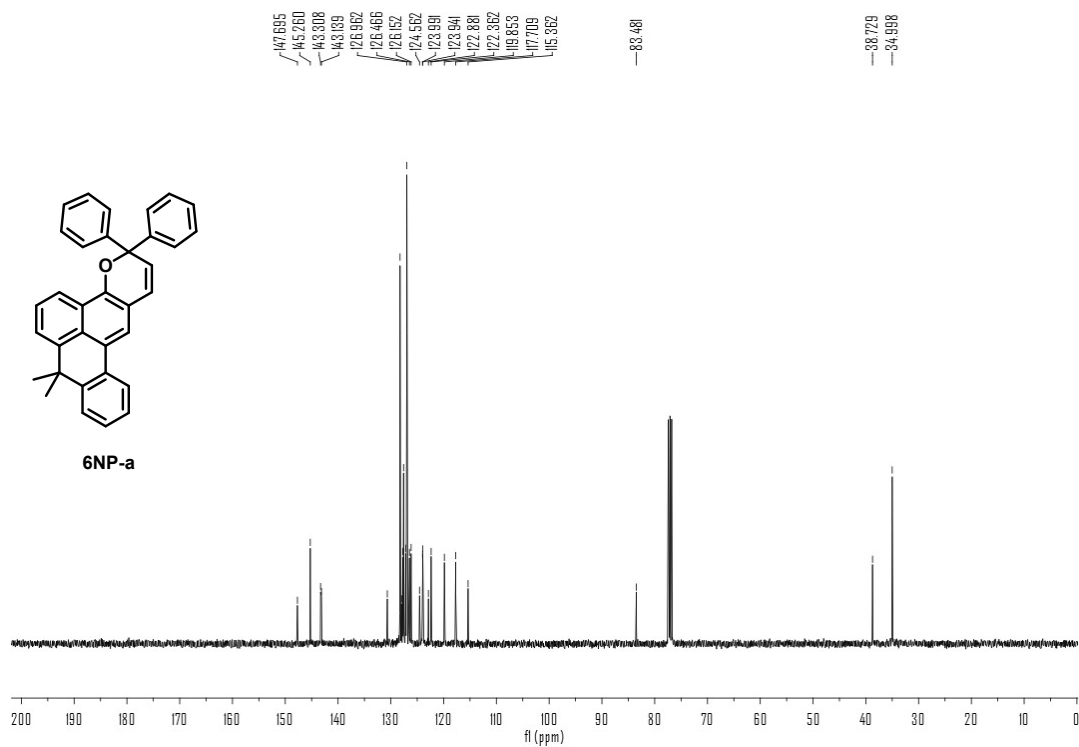

**Fig. S62.** <sup>13</sup>C NMR spectrum of 8,8-dimethyl-3,3-diphenyl-3,8-dihydroanthra [9,1-*gh*] chromene in CDCl<sub>3</sub>.



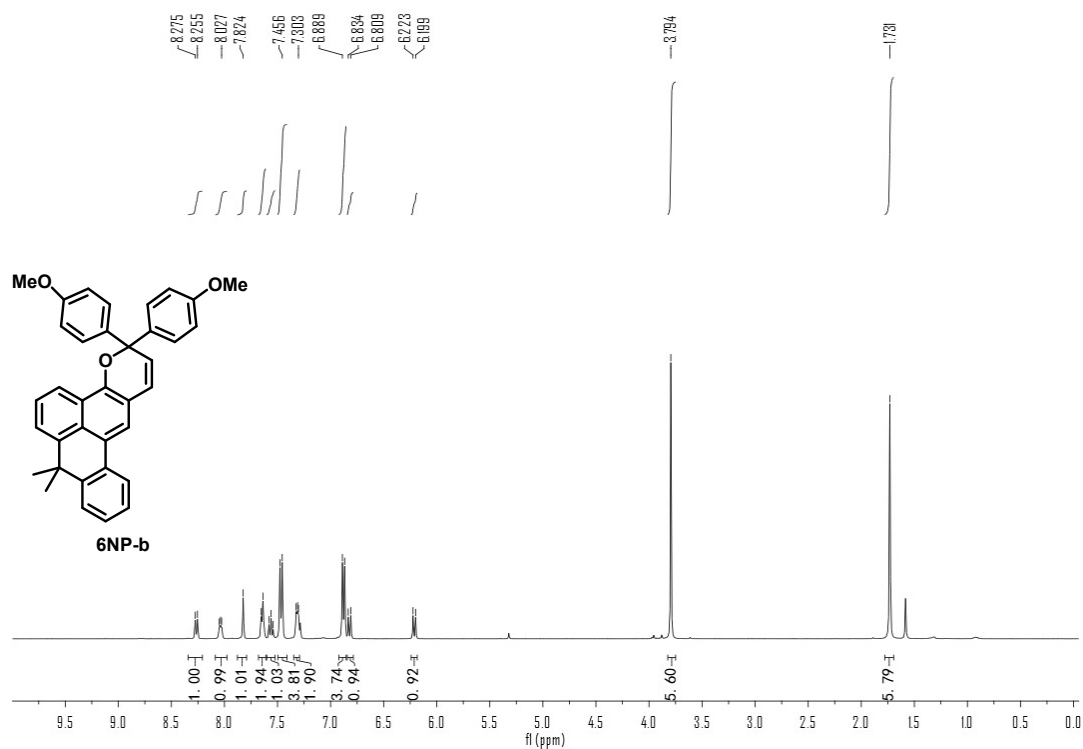

**Fig. S63.** <sup>1</sup>H NMR spectrum of 3,3-bis(4-methoxyphenyl)-8,8-dimethyl-3,8-dihydroanthra[9,1-g]chromene in CDCl<sub>3</sub>

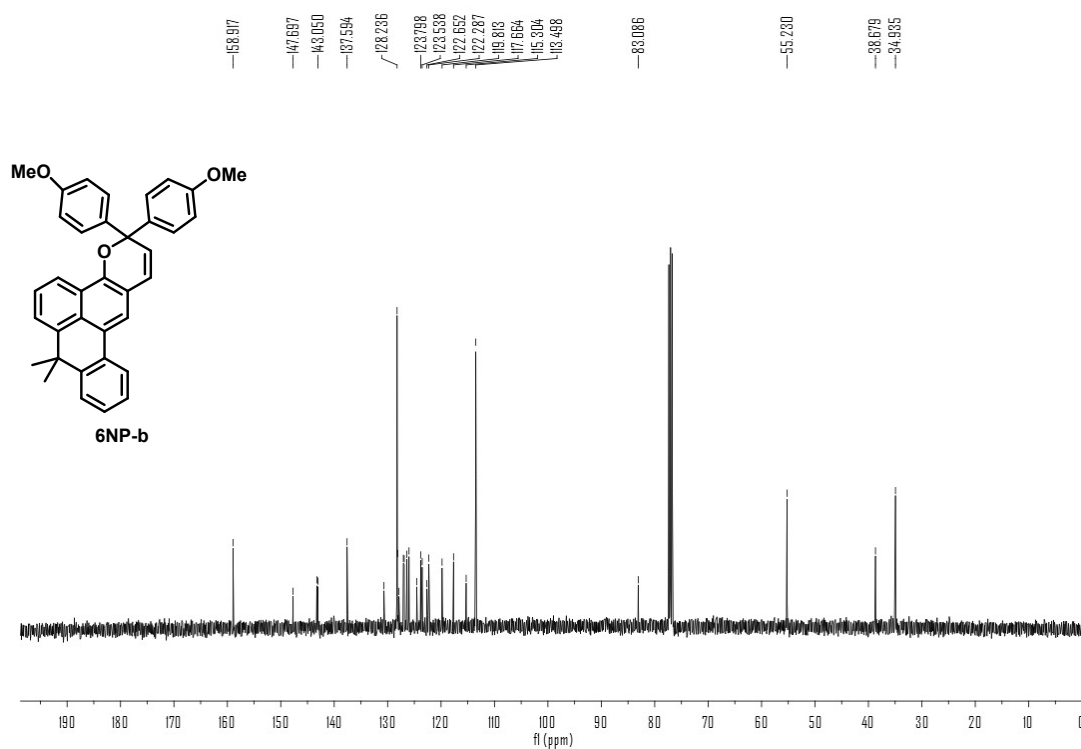

**Fig. S64.** <sup>13</sup>C NMR spectrum of 3,3-bis(4-methoxyphenyl)-8,8-dimethyl-3,8-dihydroanthra[9,1-g]chromene in CDCl<sub>3</sub>.

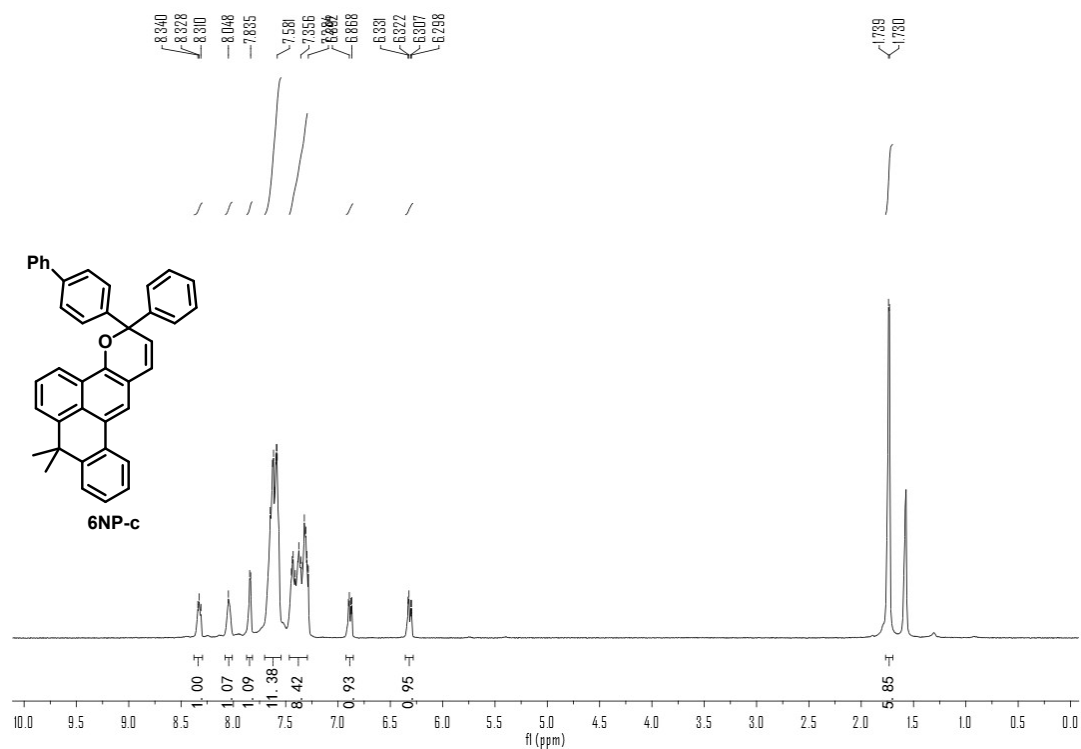

**Fig. S65.**  $^1\text{H}$  NMR spectrum of 3-([1,1'-biphenyl]-4-yl)-8,8-dimethyl-3-phenyl-3,8-dihydroanthra[9,1-*gh*]chromene in  $\text{CDCl}_3$ .

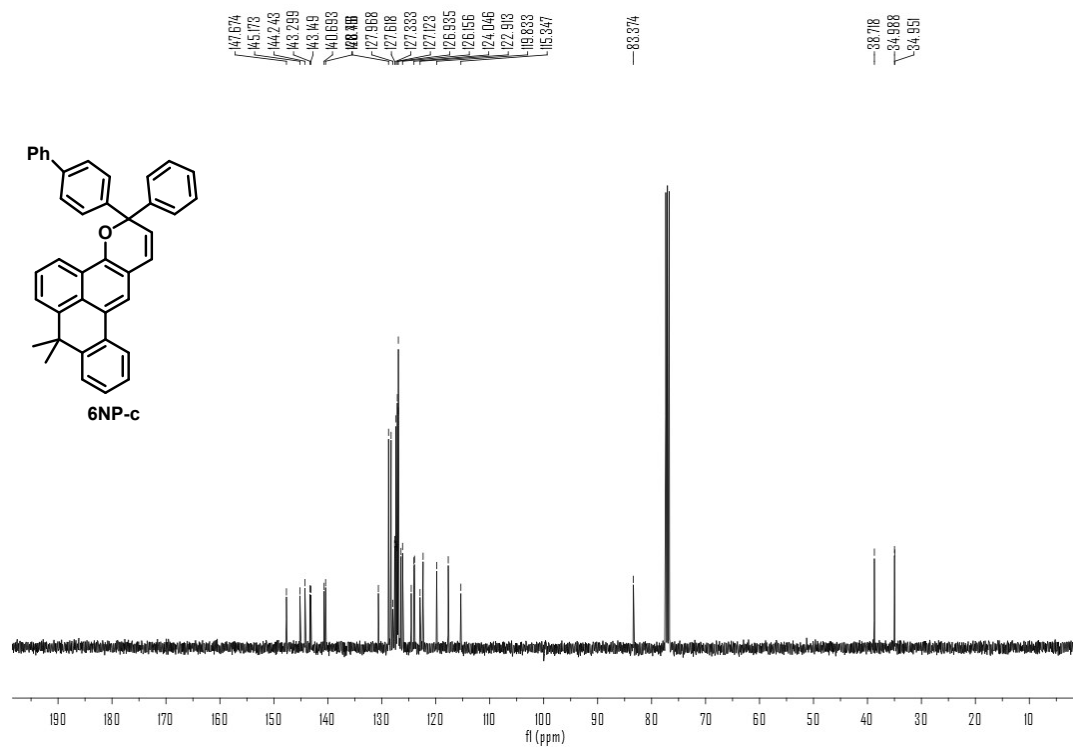

**Fig. S66.**  $^{13}\text{C}$  NMR spectrum of 3-([1,1'-biphenyl]-4-yl)-8,8-dimethyl-3-phenyl-3,8-dihydroanthra[9,1-*gh*]chromene in  $\text{CDCl}_3$ .

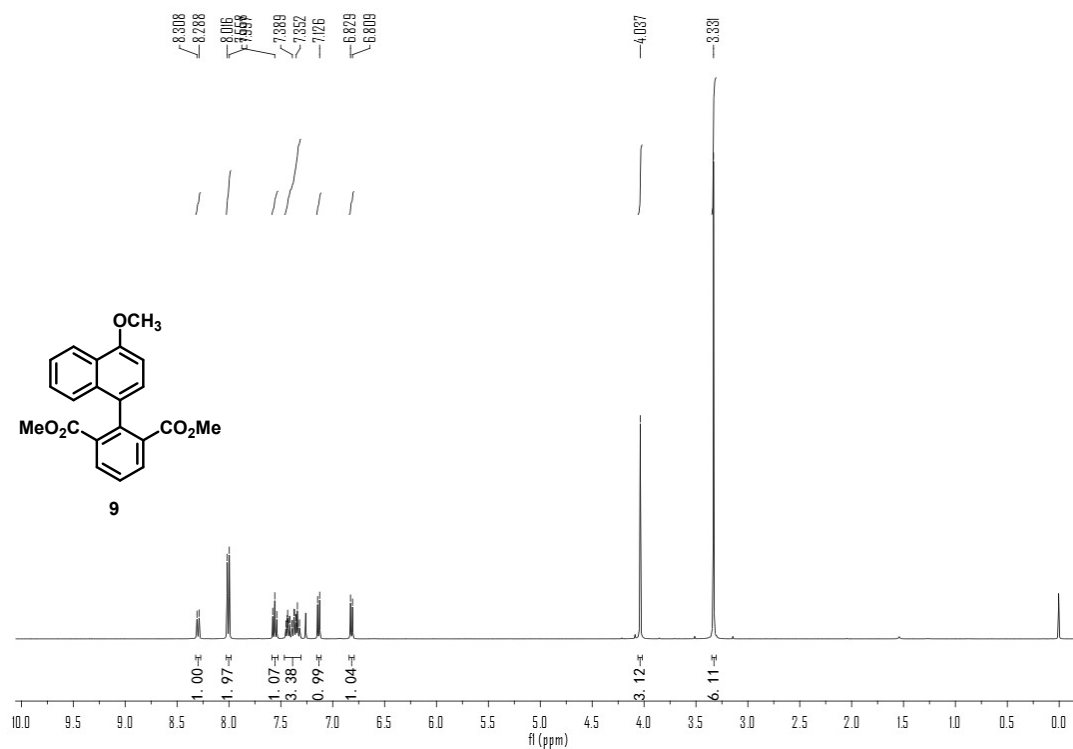

**Fig. S67.** <sup>1</sup>H NMR spectrum of **dimethyl 2-(4-methoxynaphthalen-1-yl) isophthalate (9)** in CDCl<sub>3</sub>.

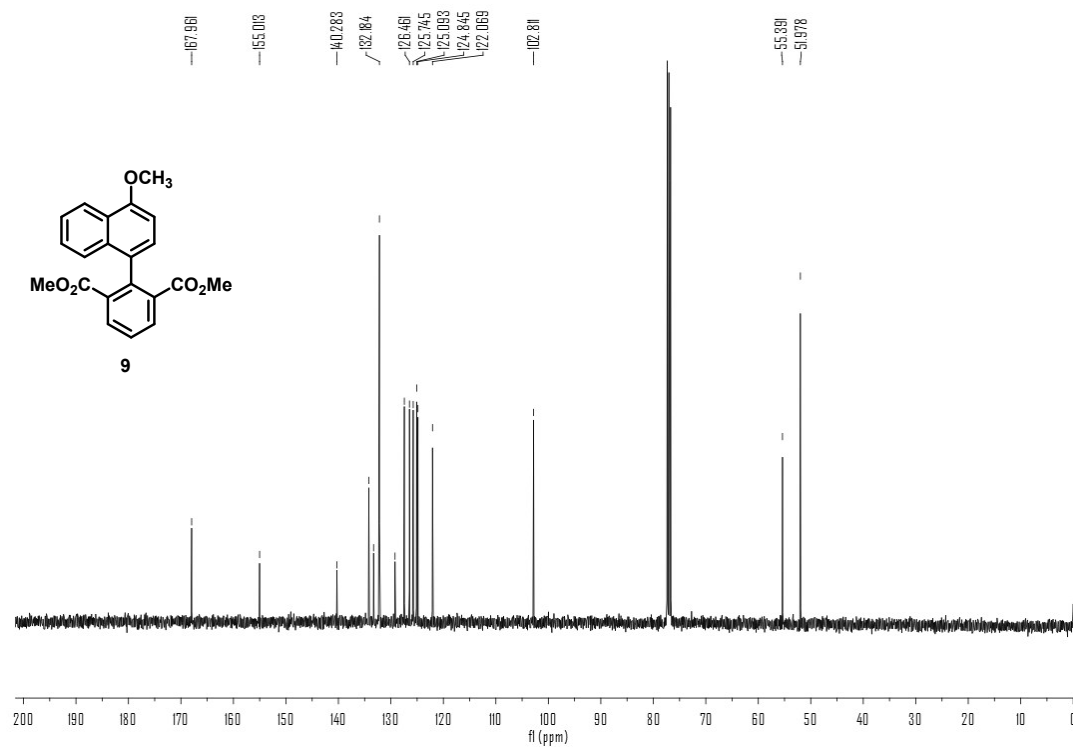

**Fig. S68.** <sup>13</sup>C NMR spectrum of **dimethyl 2-(4-methoxynaphthalen-1-yl) isophthalate (9)** in CDCl<sub>3</sub>.

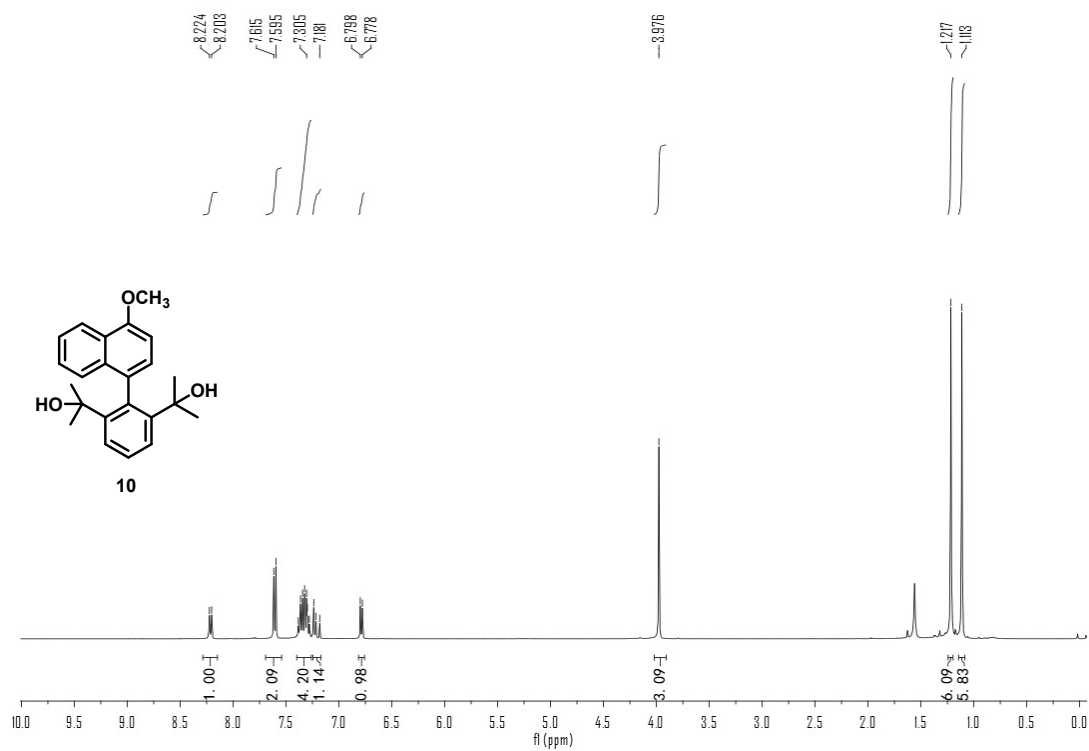

**Fig. S69.** <sup>1</sup>H NMR spectrum of **dimethyl 2-(4-methoxynaphthalen-1-yl) isophthalate (10)** in CDCl<sub>3</sub>.

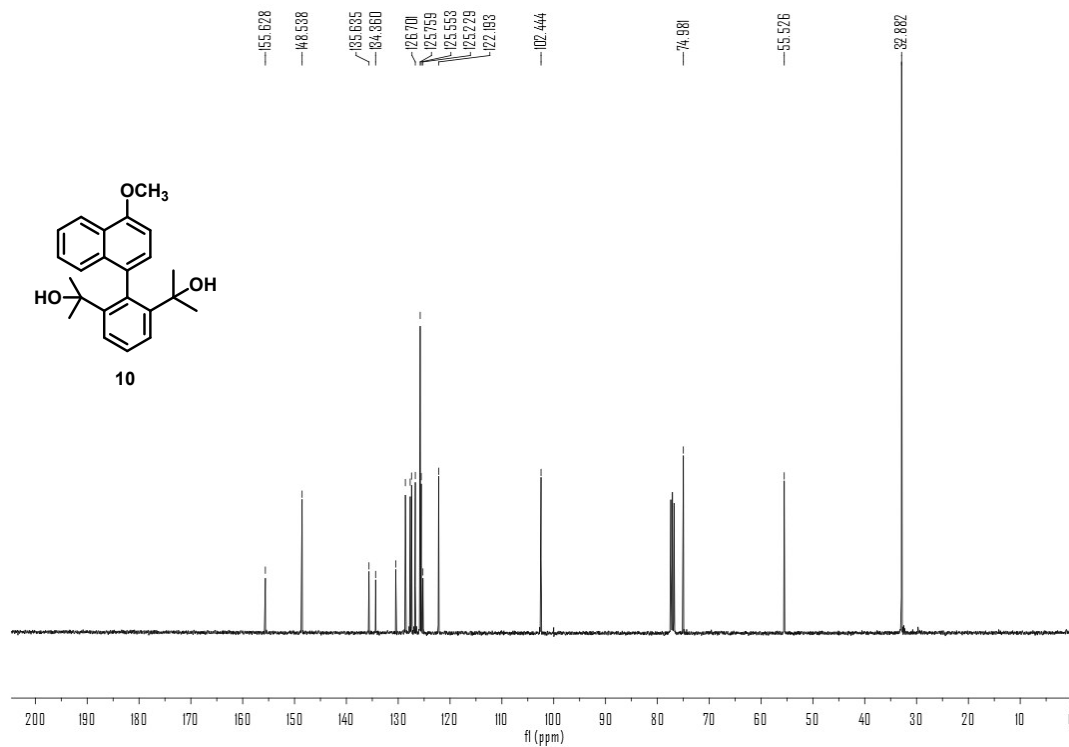

**Fig. S70.** <sup>13</sup>C NMR spectrum of **dimethyl 2-(4-methoxynaphthalen-1-yl) isophthalate (10)** in CDCl<sub>3</sub>.

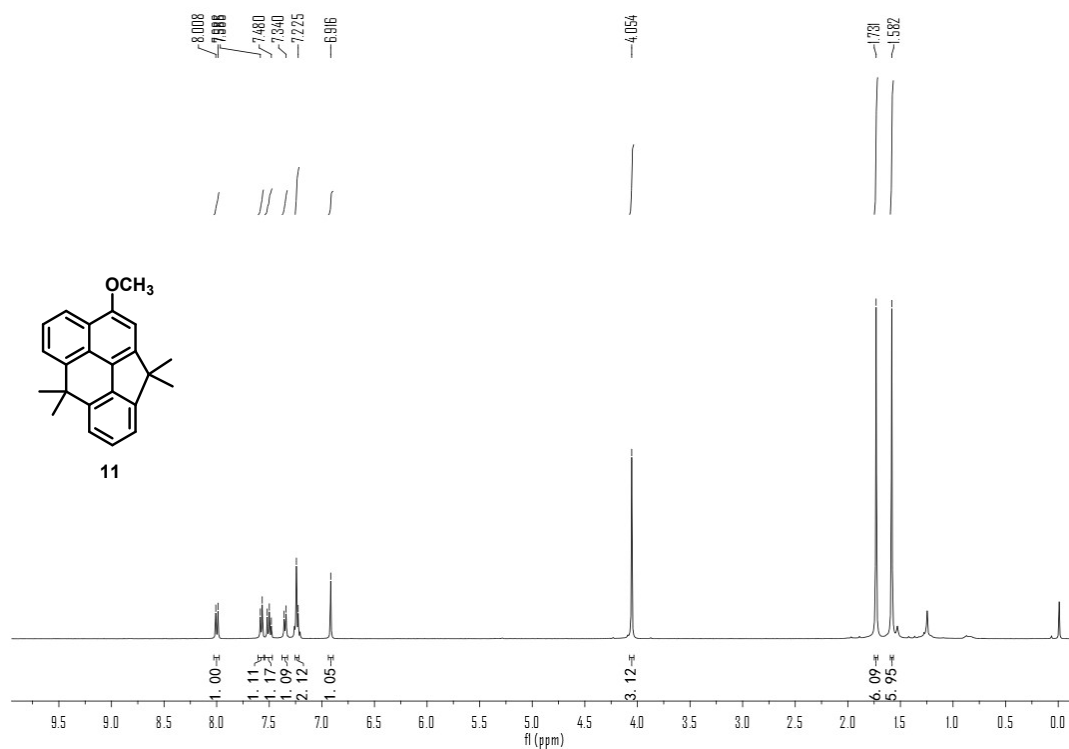

**Fig. S71.** <sup>1</sup>H NMR spectrum of 9-methoxy-1,1,5,5-tetramethyl-1,5-dihydrobenzo[*mno*]aceanthrylene (11) in CDCl<sub>3</sub>.

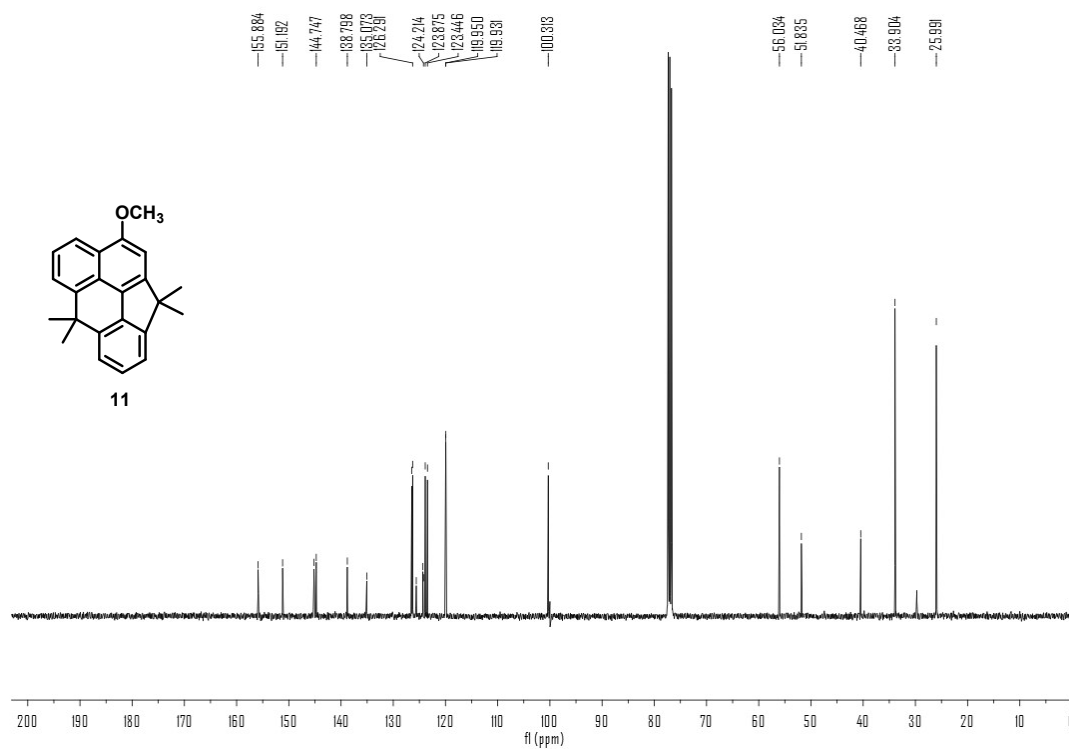

**Fig. S72.** <sup>13</sup>C NMR spectrum of 9-methoxy-1,1,5,5-tetramethyl-1,5-dihydrobenzo[*mno*]aceanthrylene (11) in CDCl<sub>3</sub>.

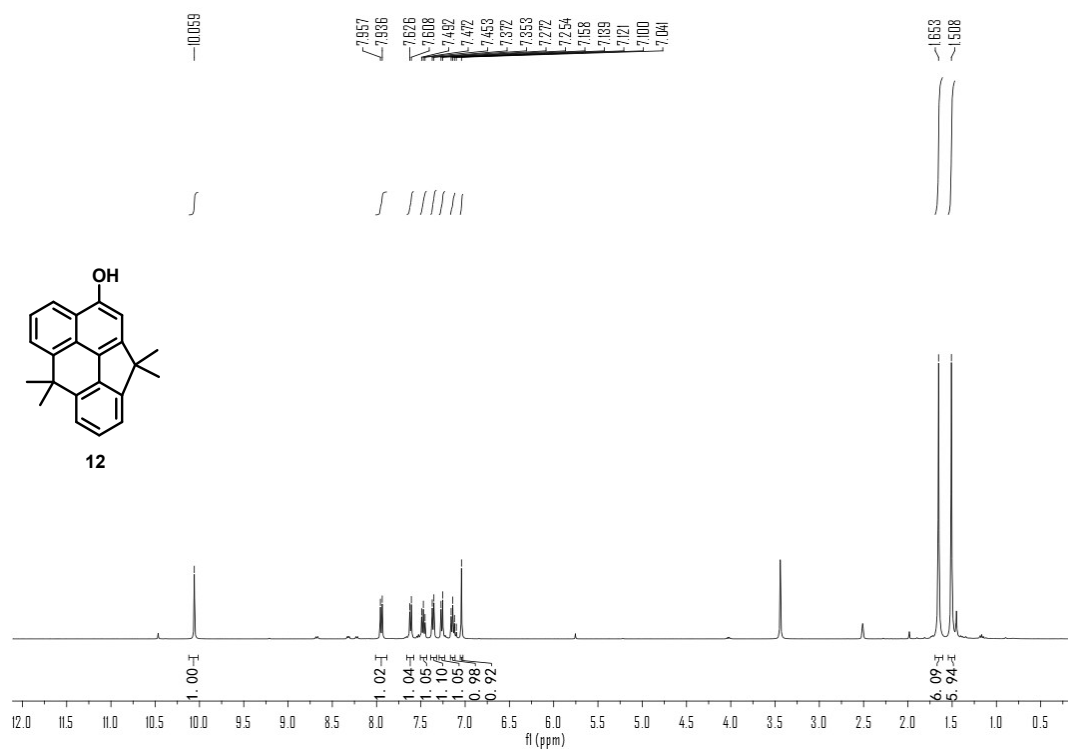

**Fig. S73.** <sup>1</sup>H NMR spectrum of **9-methoxy-1,1,5,5-tetramethyl-1,5-dihydrobenzo[*mno*]aceanthrylene (12)** in CDCl<sub>3</sub>.

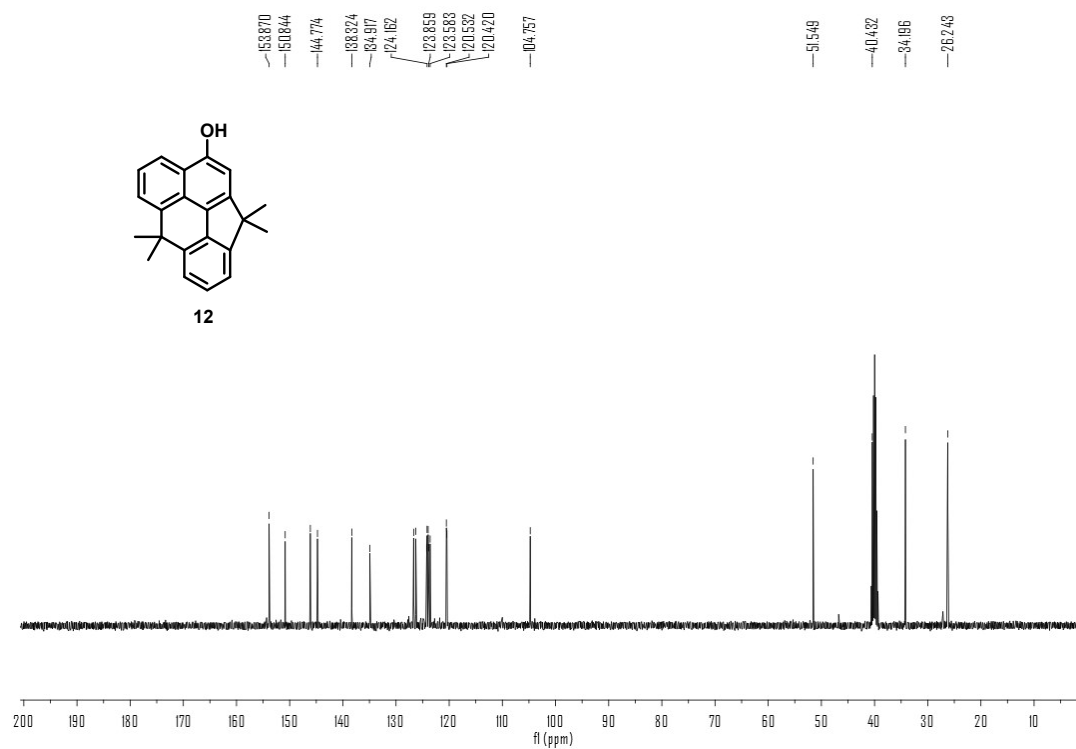

**Fig. S74.** <sup>13</sup>C NMR spectrum of **9-methoxy-1,1,5,5-tetramethyl-1,5-dihydrobenzo[*mno*]aceanthrylene (12)** in CDCl<sub>3</sub>.

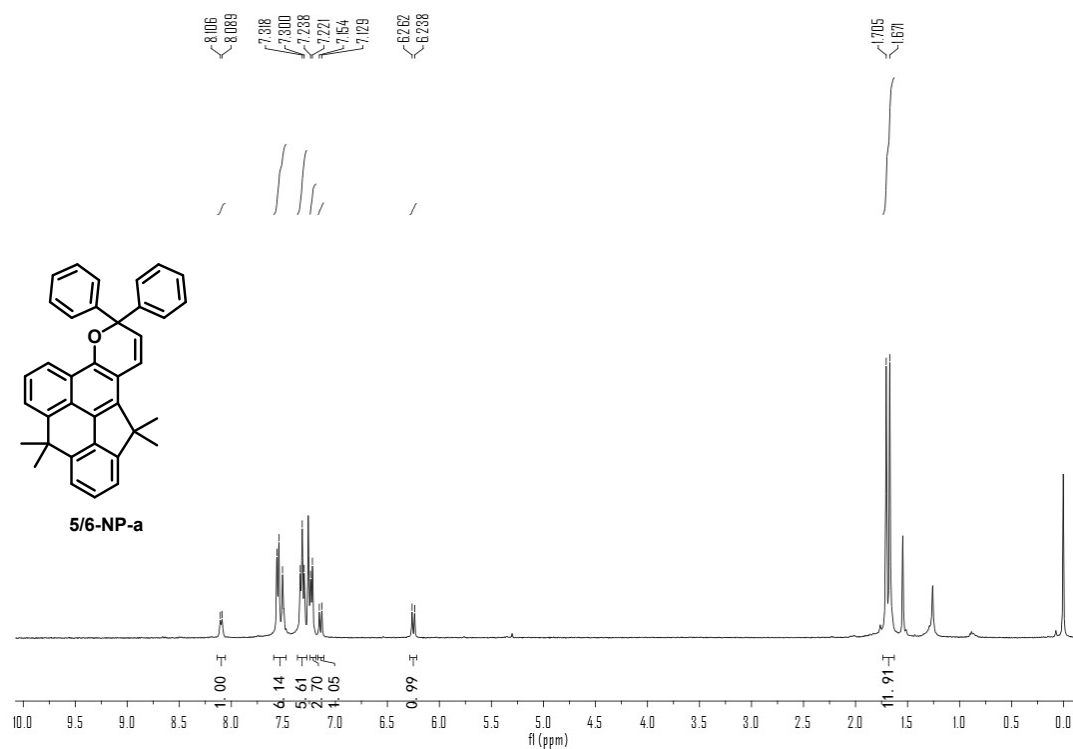

**Fig. S75.** <sup>1</sup>H NMR spectrum of 8,8,12,12-tetramethyl-3,3-diphen-yl- 8,12-dihydro-3H-aceanthryleno[1,10-fgh]chromene in CDCl<sub>3</sub>.

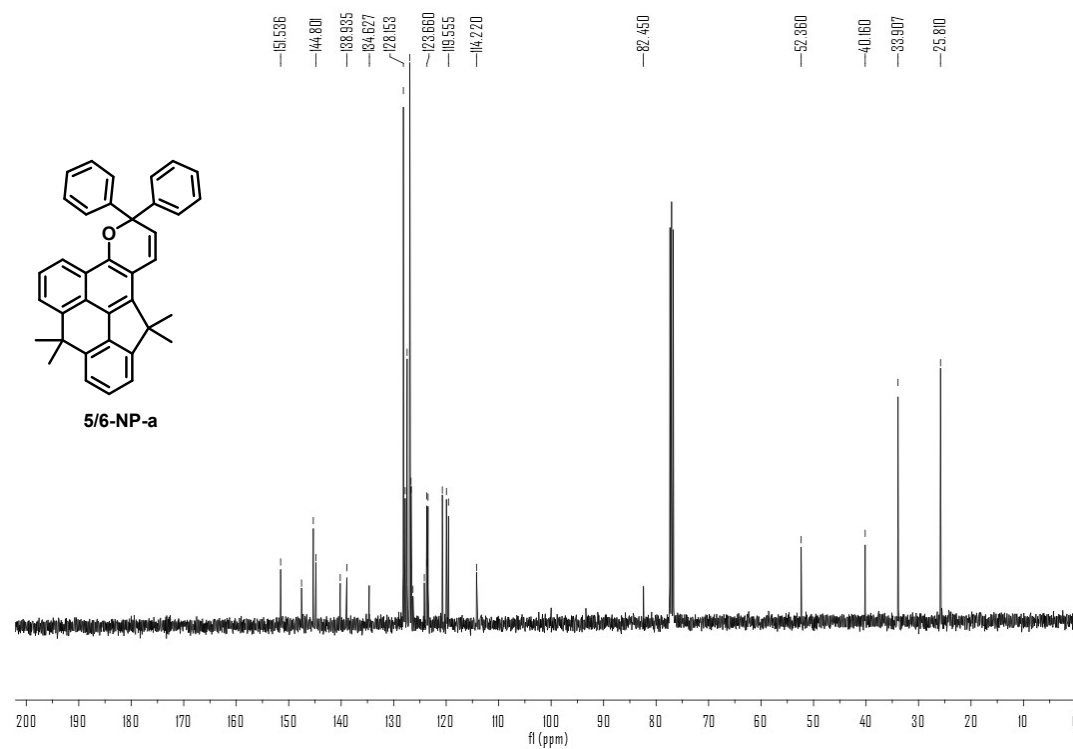

**Fig. S76.** <sup>13</sup>C NMR spectrum of 8,8,12,12-tetramethyl-3,3-diphen-yl- 8,12-dihydro-3H-aceanthryleno[1,10-fgh]chromene in CDCl<sub>3</sub>.

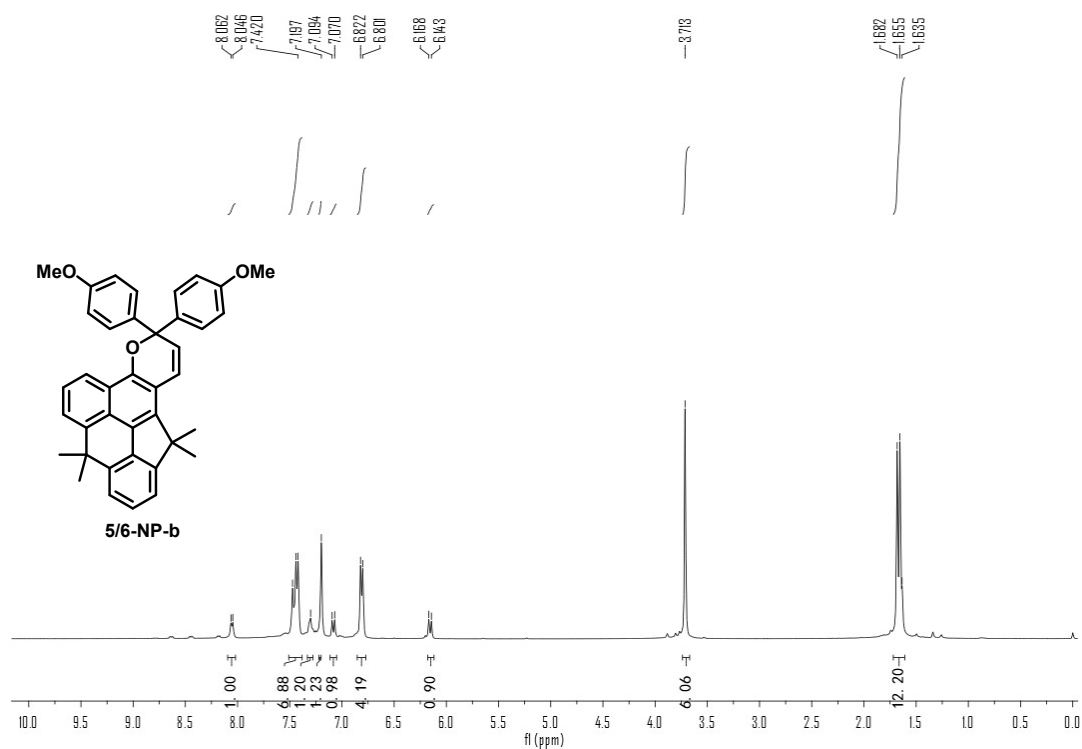

**Fig. S77.** <sup>1</sup>H NMR spectrum of 3,3-bis(4-methoxyphenyl)-8,8,12,12-tetramethyl-8,12-dihydro-3H-acenanthryleno[1,10-fgh]chromene in CDCl<sub>3</sub>.

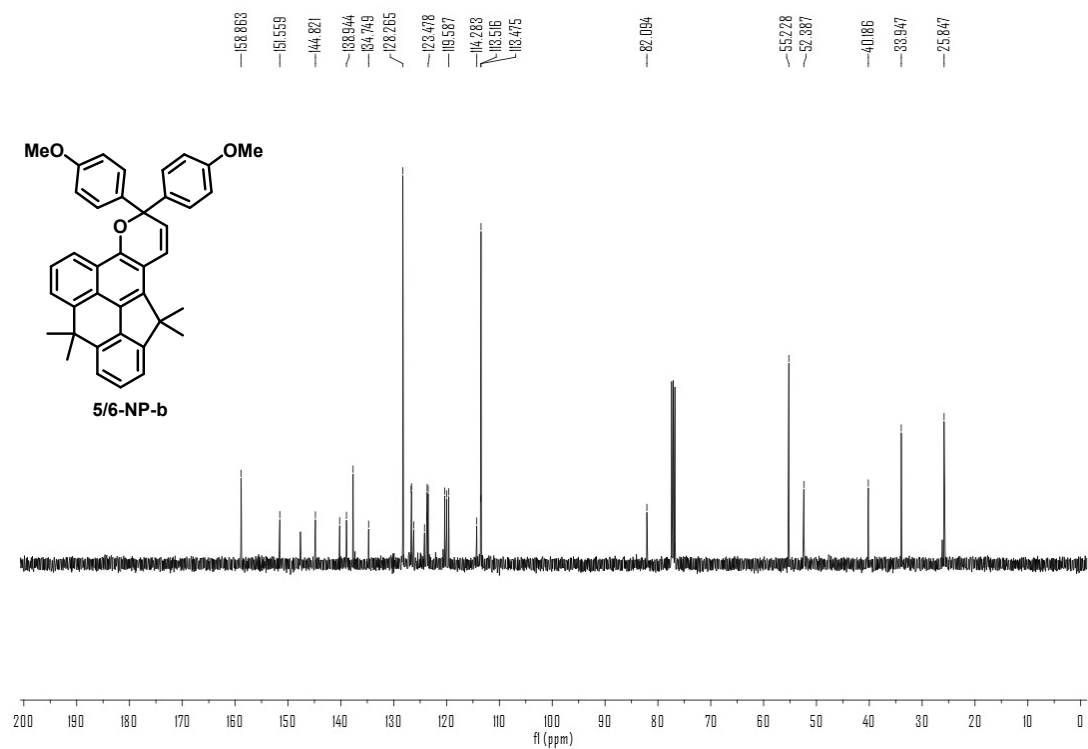

**Fig. S78.** <sup>13</sup>C NMR spectrum of 3,3-bis(4-methoxyphenyl)-8,8,12,12-tetramethyl-8,12-dihydro-3H-acenanthryleno[1,10-fgh]chromene in CDCl<sub>3</sub>.



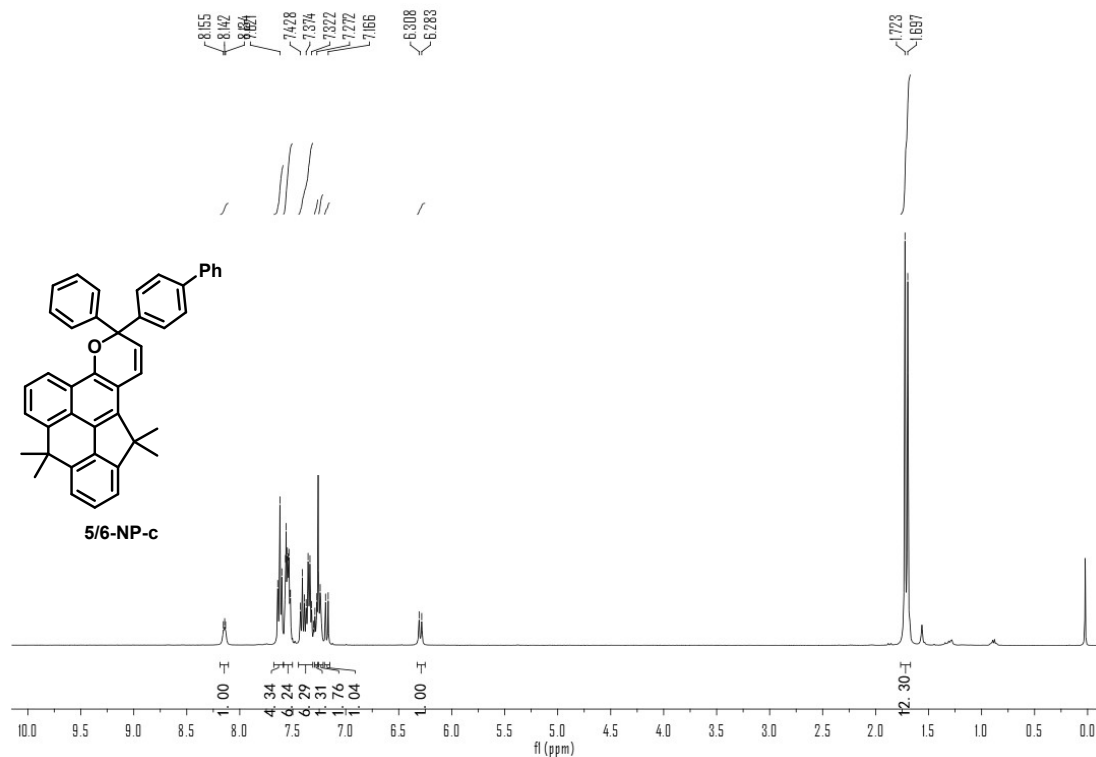

**Fig. S79.**  $^1\text{H}$  NMR spectrum of 3-([1,1'-biphenyl]-4-yl)-8,8,12,12-tetramethyl-3-phenyl-8,12-dihydro-3*H*-aceanthryleno[1,10-*fgh*]chromene in  $\text{CDCl}_3$ .

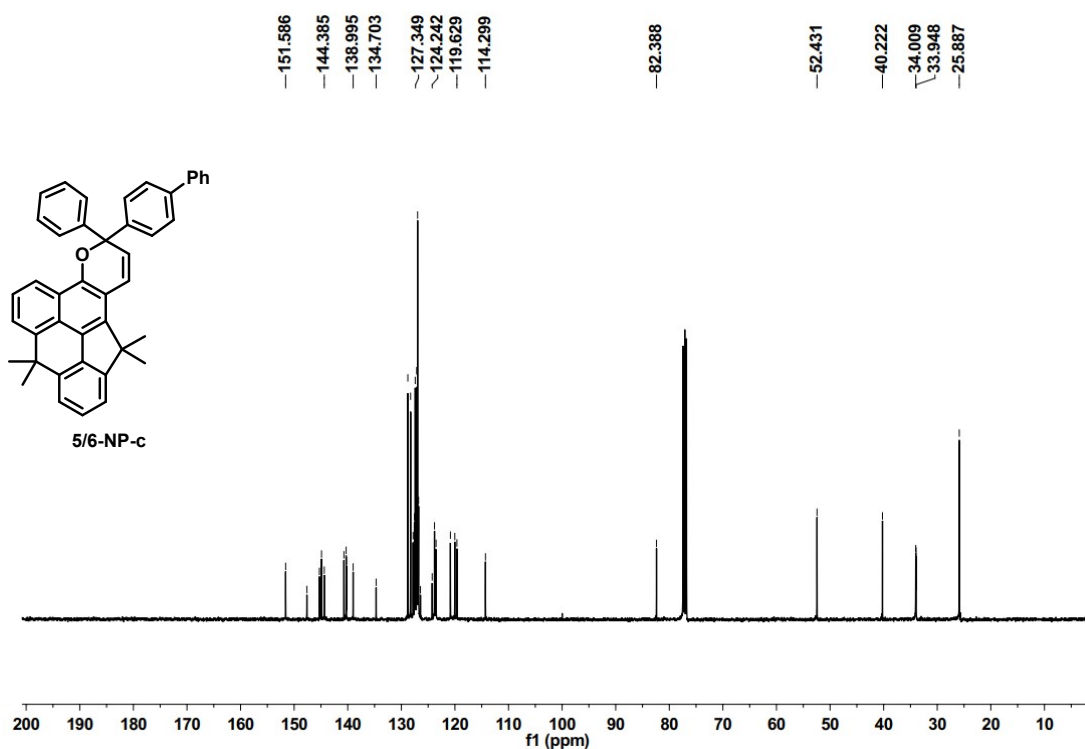

**Fig. S80.**  $^{13}\text{C}$  NMR spectrum of 3-([1,1'-biphenyl]-4-yl)-8,8,12,12-tetramethyl-3-phenyl-8,12-dihydro-3*H*-aceanthryleno[1,10-*fgh*]chromene in  $\text{CDCl}_3$ .

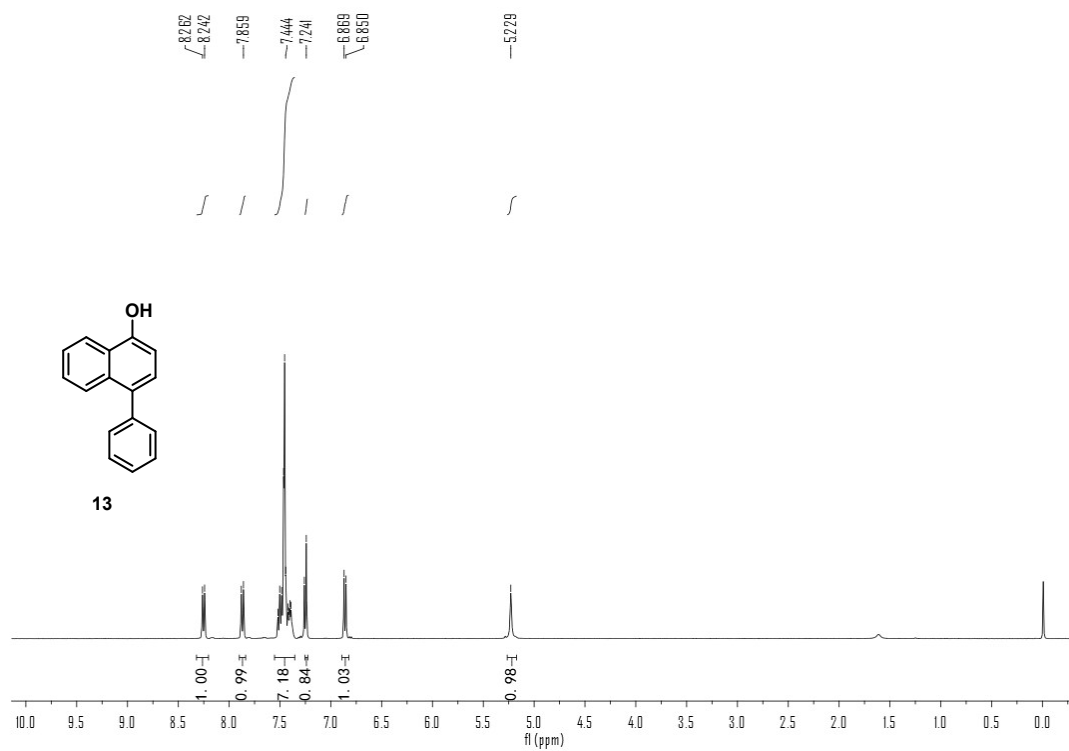

Fig. S81. <sup>1</sup>H NMR spectrum of 4-phenylnaphthalen-1-ol (13) in CDCl<sub>3</sub>.

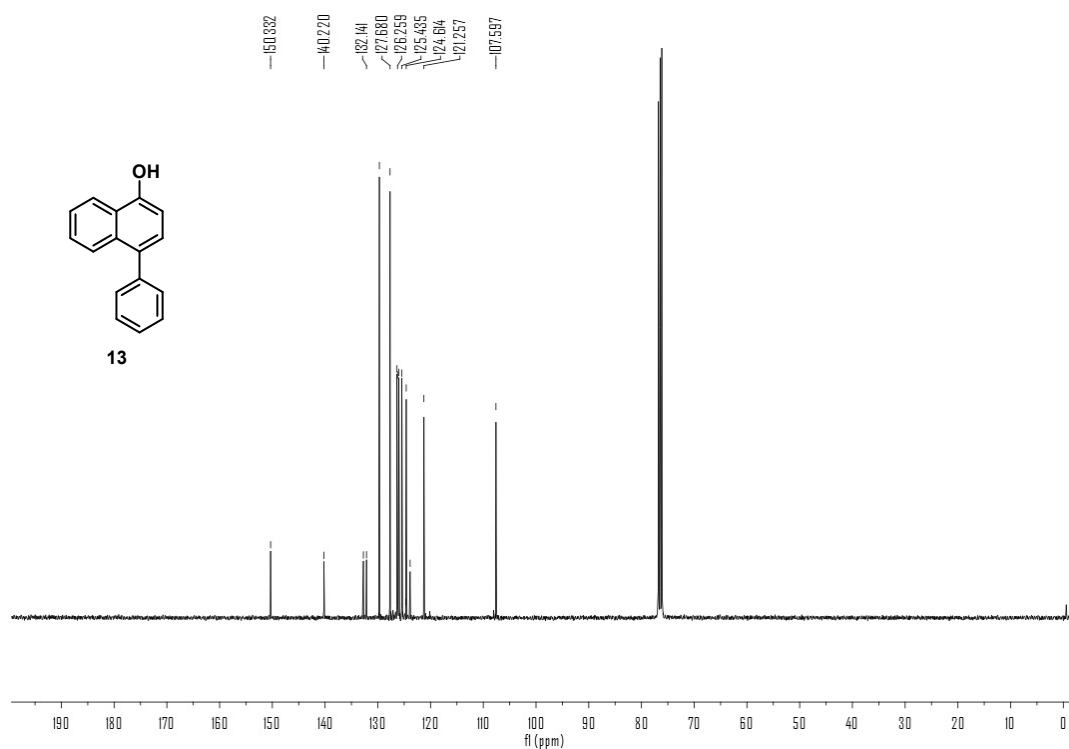

Fig. S82. <sup>13</sup>C NMR spectrum of 4-phenylnaphthalen-1-ol (13) in CDCl<sub>3</sub>.

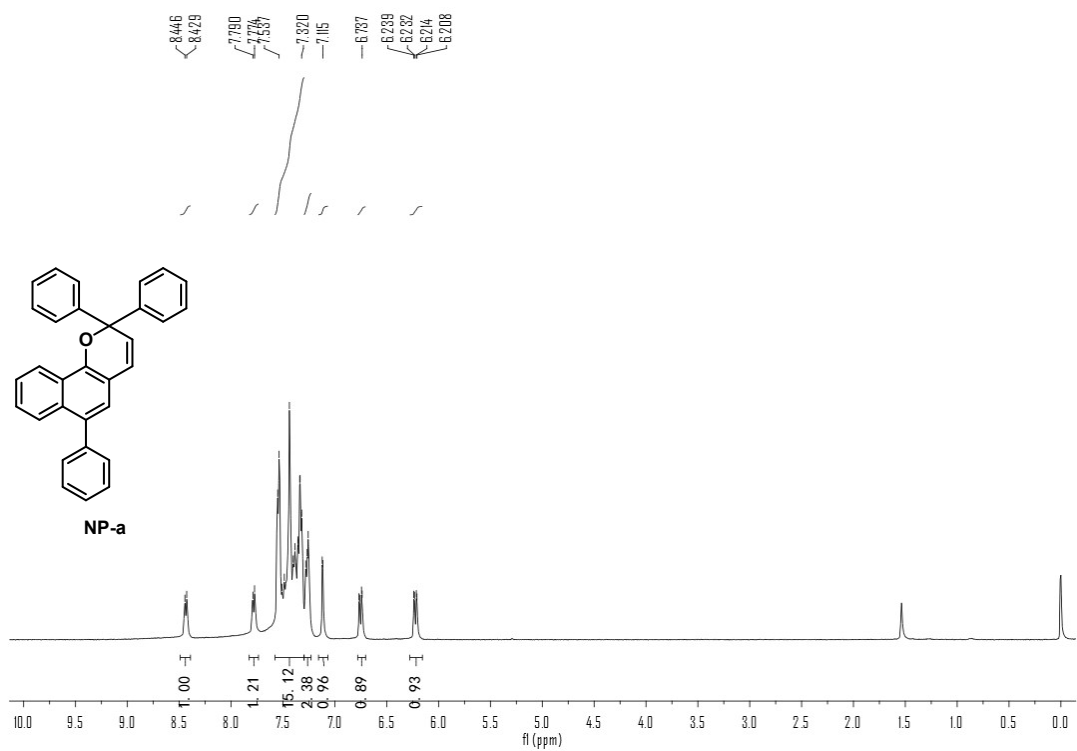

Fig. S83. <sup>1</sup>H NMR spectrum of 2,2,6-triphenyl-2H-benzo[h]chromene in CDCl<sub>3</sub>.

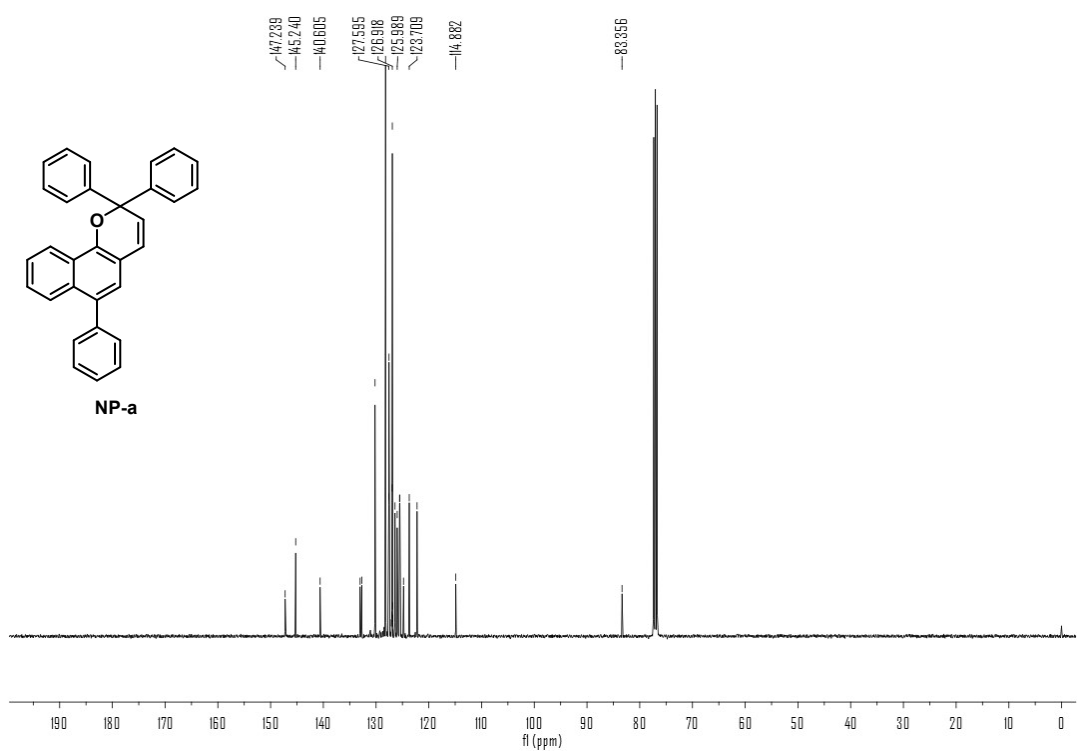

Fig. S84. <sup>13</sup>C NMR spectrum of 2,2,6-triphenyl-2H-benzo[h]chromene in CDCl<sub>3</sub>.

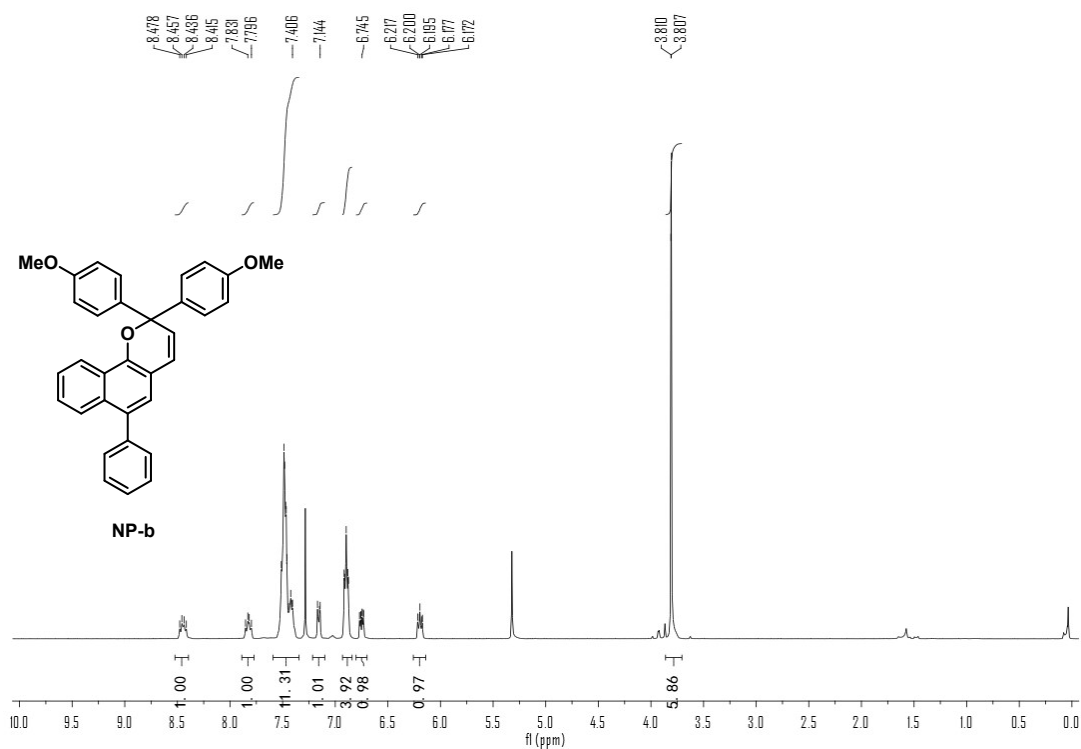

**Fig. S85.** <sup>1</sup>H NMR spectrum of 2,2-bis(4-methoxyphenyl)-6-phenyl-2*H*-benzo[*h*]chromene in CDCl<sub>3</sub>.

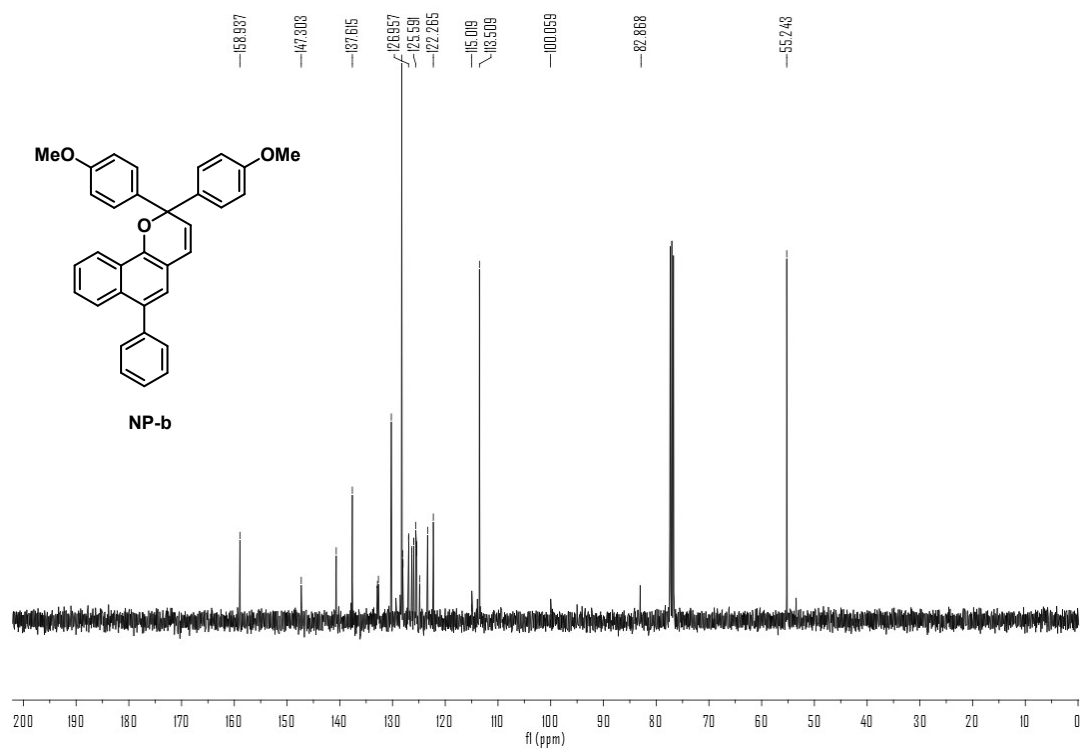

**Fig. S86.** <sup>13</sup>C NMR spectrum of 2,2-bis(4-methoxyphenyl)-6-phenyl-2*H*-benzo[*h*]chromene in CDCl<sub>3</sub>.

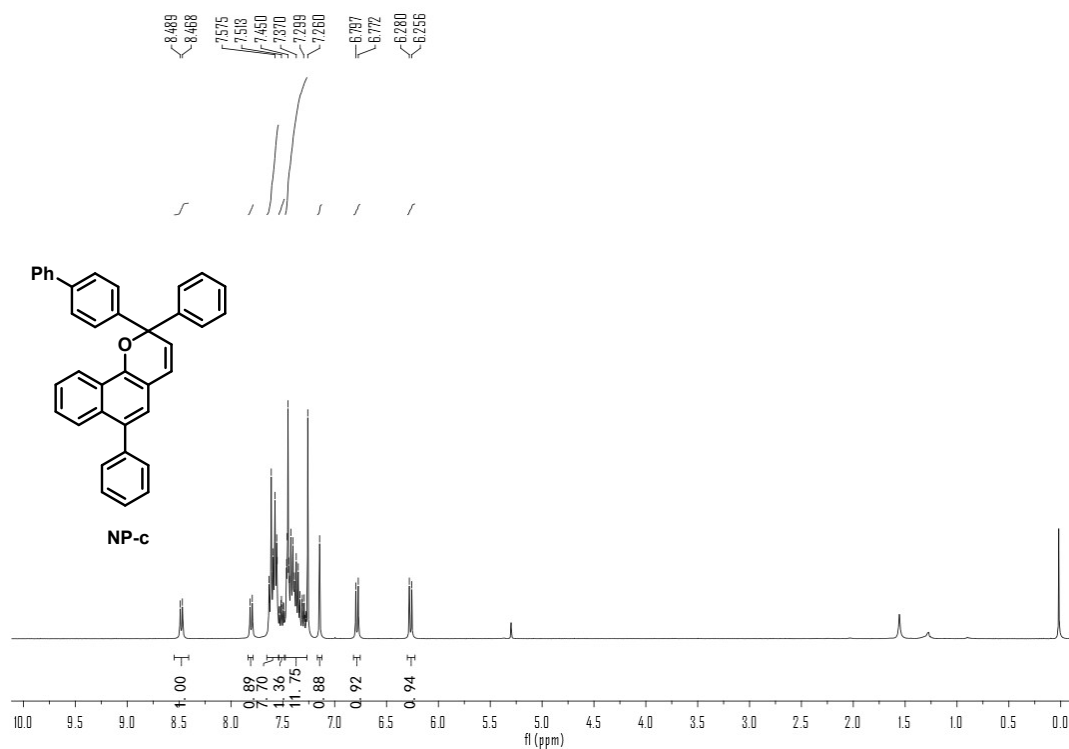

**Fig. S87.** <sup>1</sup>H NMR spectrum of 2-([1,1'-biphenyl]-4-yl)-2,6-diphenyl-2*H*-benzo [*h*]chromene in CDCl<sub>3</sub>.

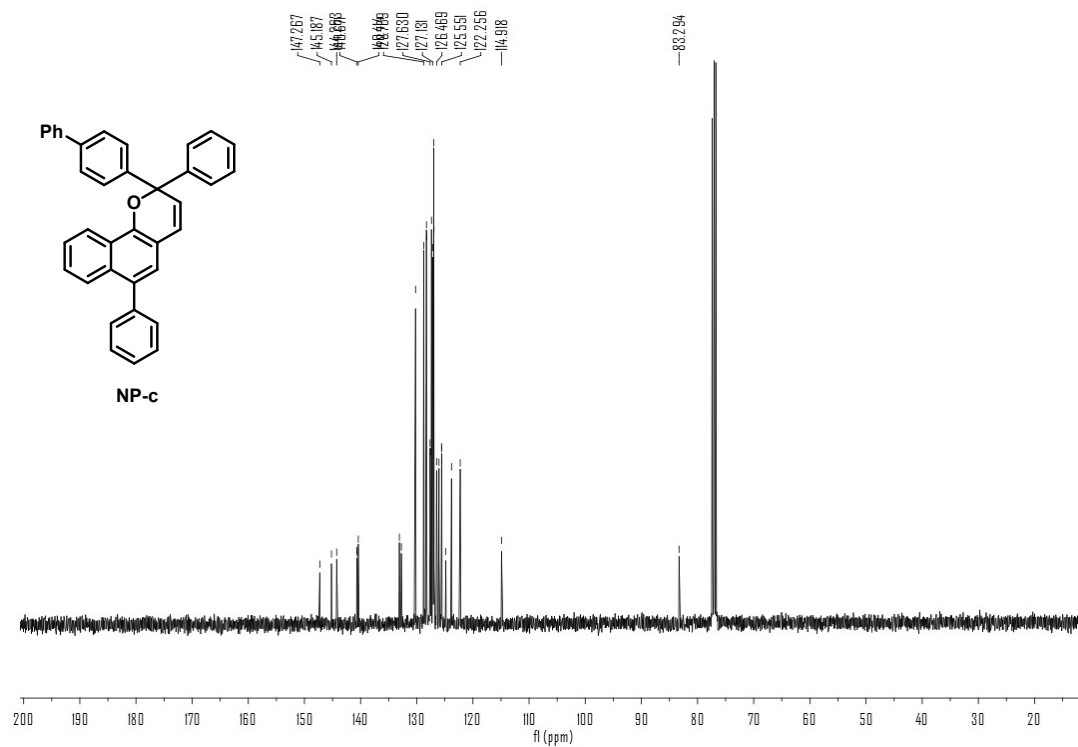

**Fig. S88.** <sup>13</sup>C NMR spectrum of 2-([1,1'-biphenyl]-4-yl)-2,6-diphenyl-2*H*-benzo [*h*]chromene in CDCl<sub>3</sub>.

## 5. HR-ESI-TOF-MS Spectra

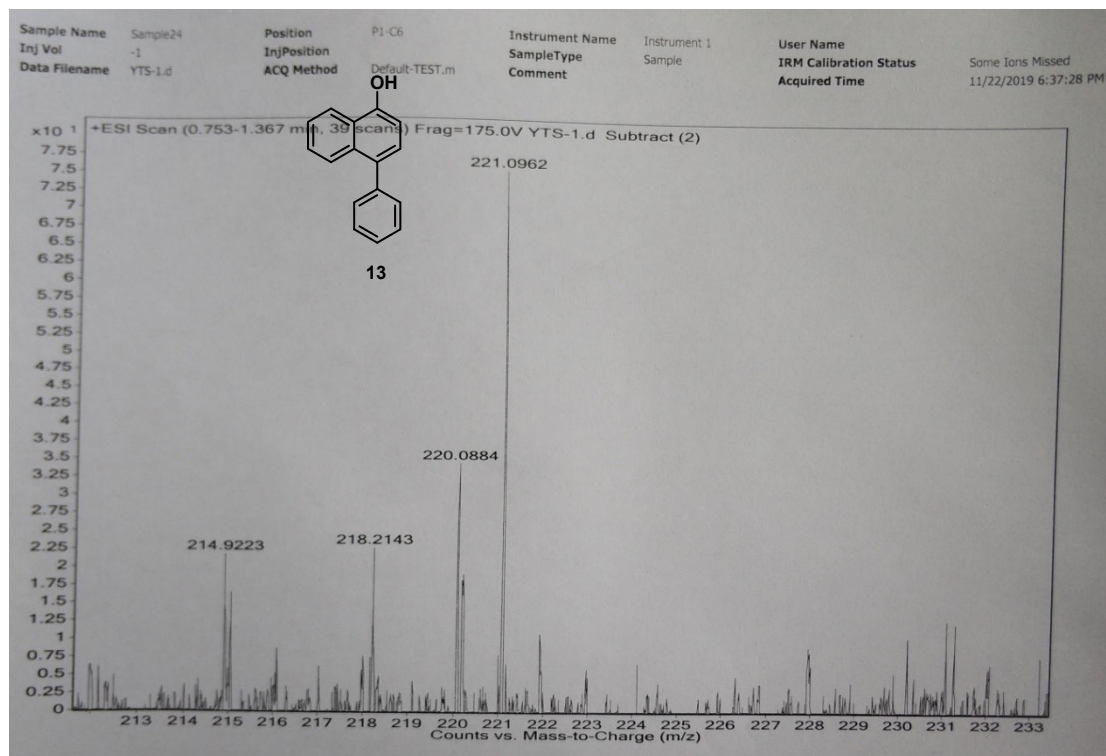

**Fig. S89.** HR-ESI-TOF-MS of 4-phenylnaphthalen-1-ol.

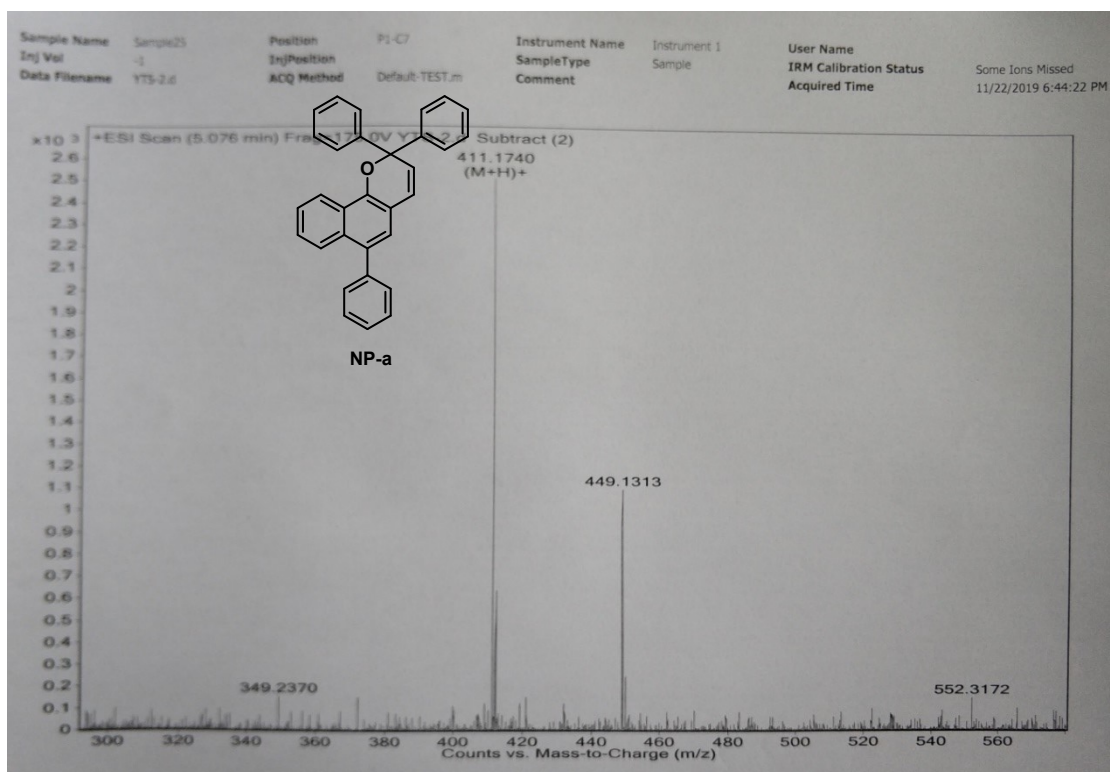

Fig. S90. HR-ESI-TOF-MS of 2,2,6-triphenyl-2H-benzo[h]chromene.

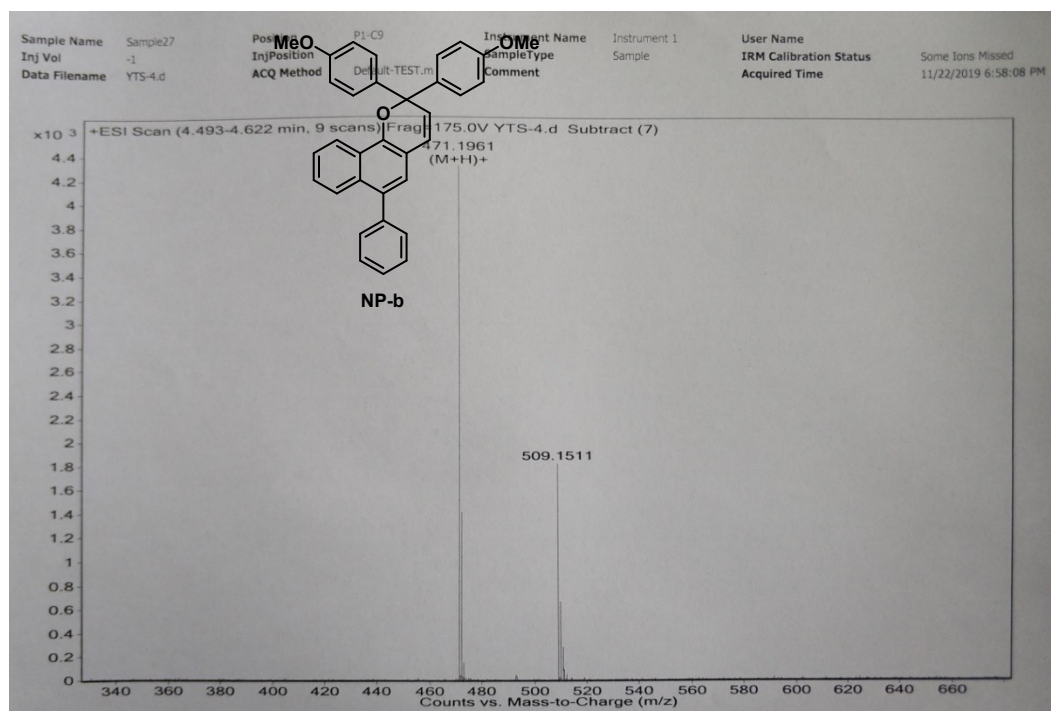

**Fig. S91.** HR-ESI-TOF-MS of **2-([1,1'-biphenyl]-4-yl)-2,6-diphenyl-2H-benzo[*h*]chromene.**



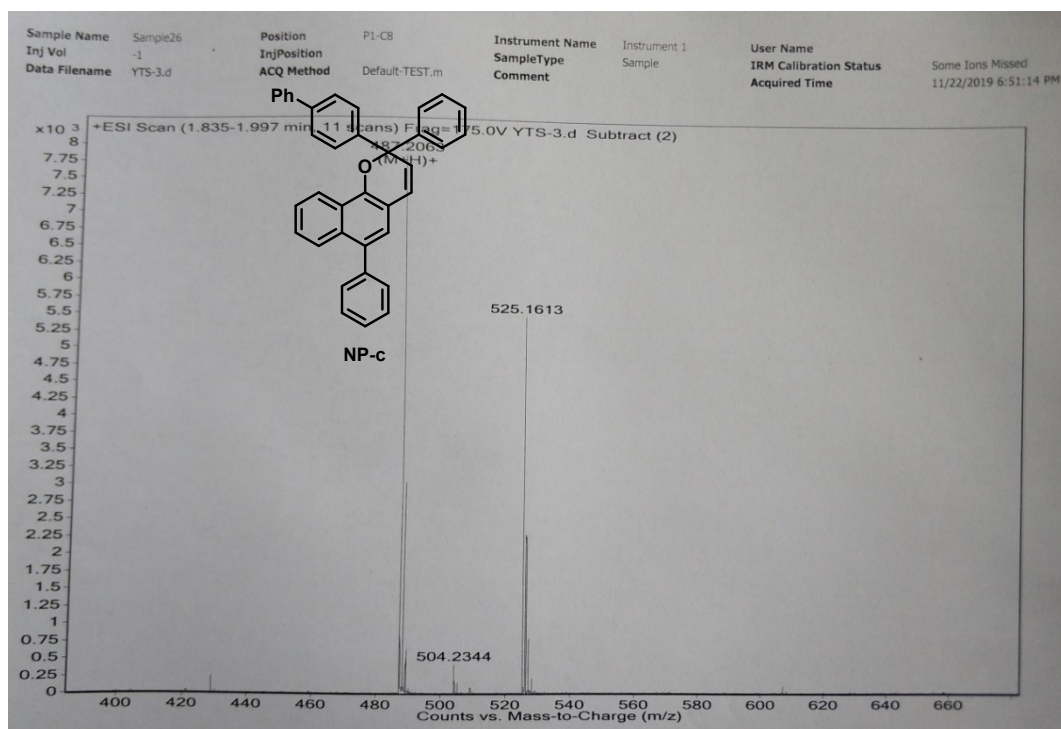

**Fig. S92.** HR-ESI-TOF-MS of **2,2-bis(4-methoxyphenyl)-6-phenyl-2H-benzo[*h*]chromene**.

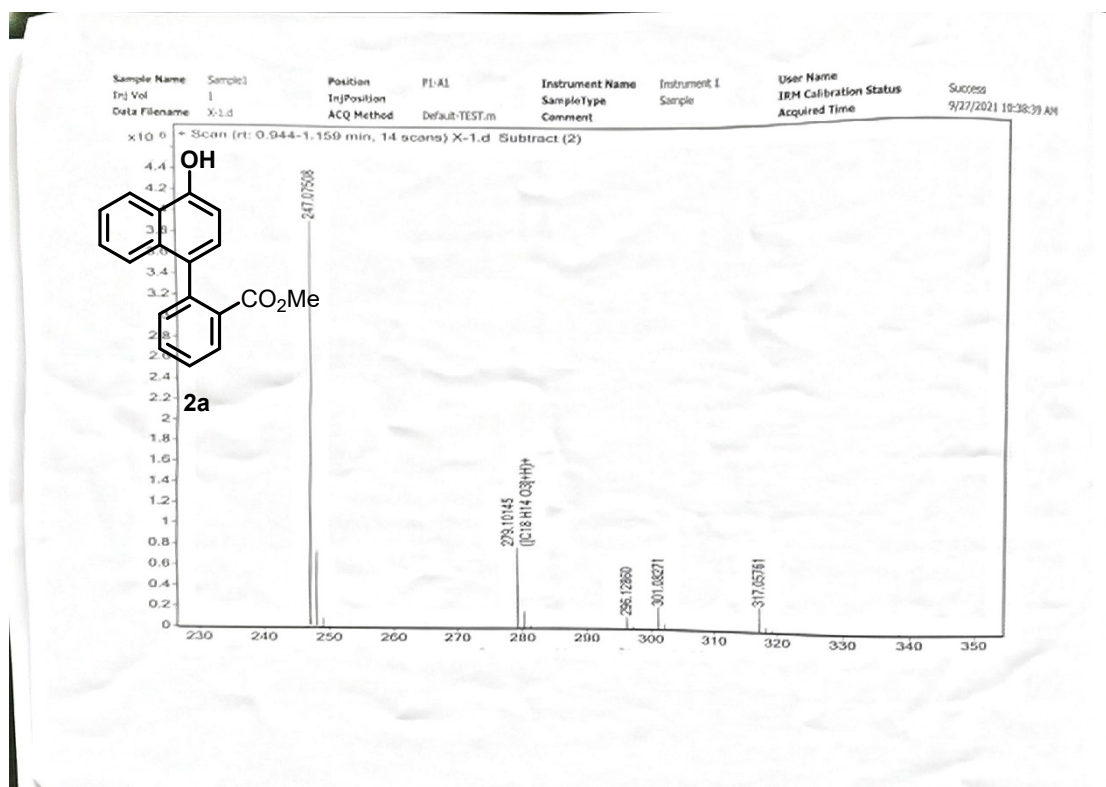

Fig. S93. HR-ESI-TOF-MS of methyl 2-(4-hydroxynaphthalen-1-yl)benzoate (6a).

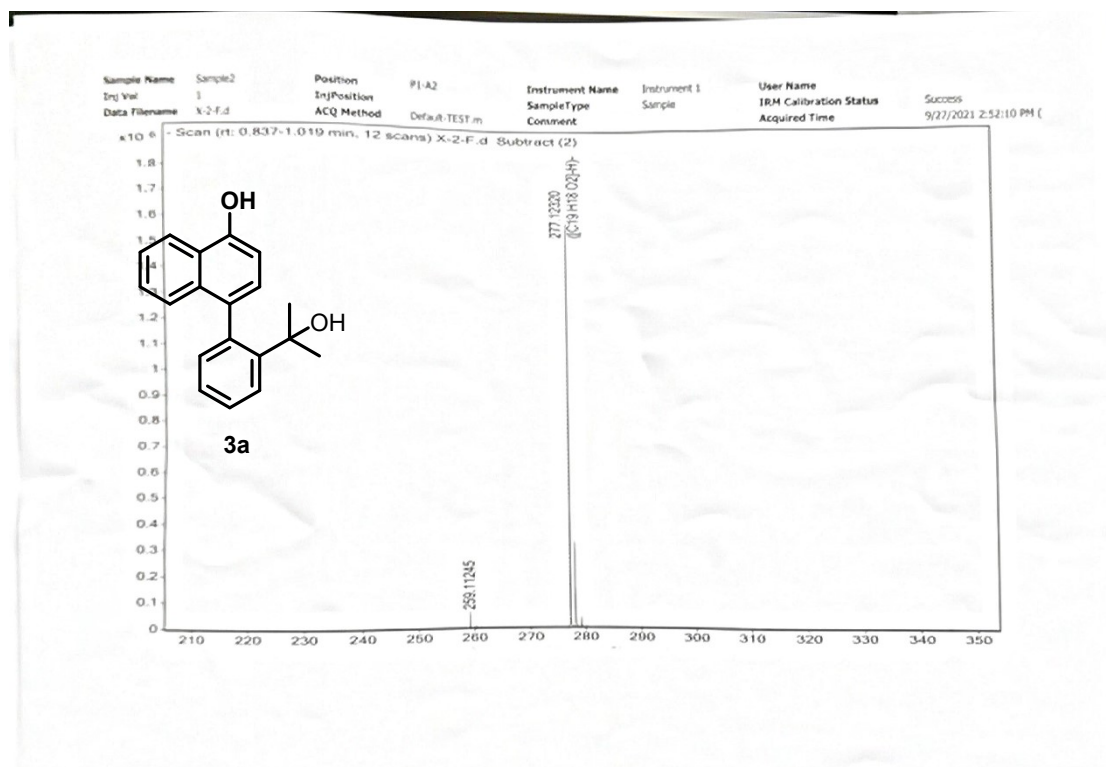

Fig. S94. 4-(2-(2-hydroxypropan-2-yl)phenyl)naphthalen-1-ol (7a).

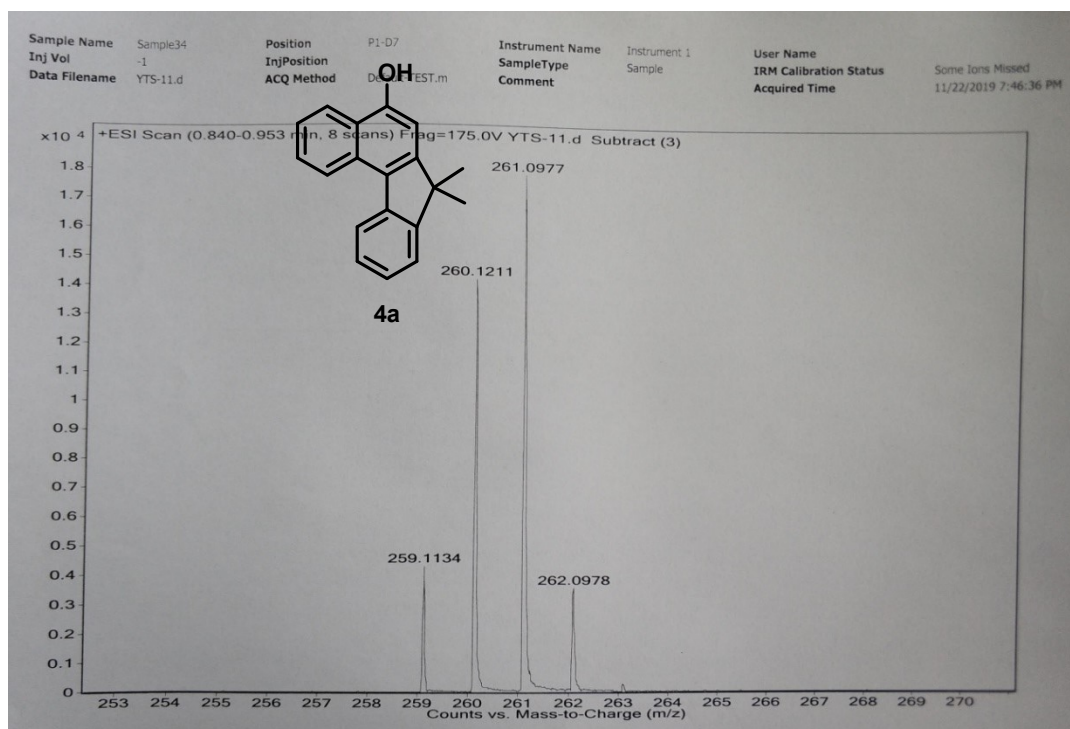

**Fig. S95.** HR-ESI-TOF-MS of 7,7-dimethyl-7H-benzo[c]fluoren-5-ol.

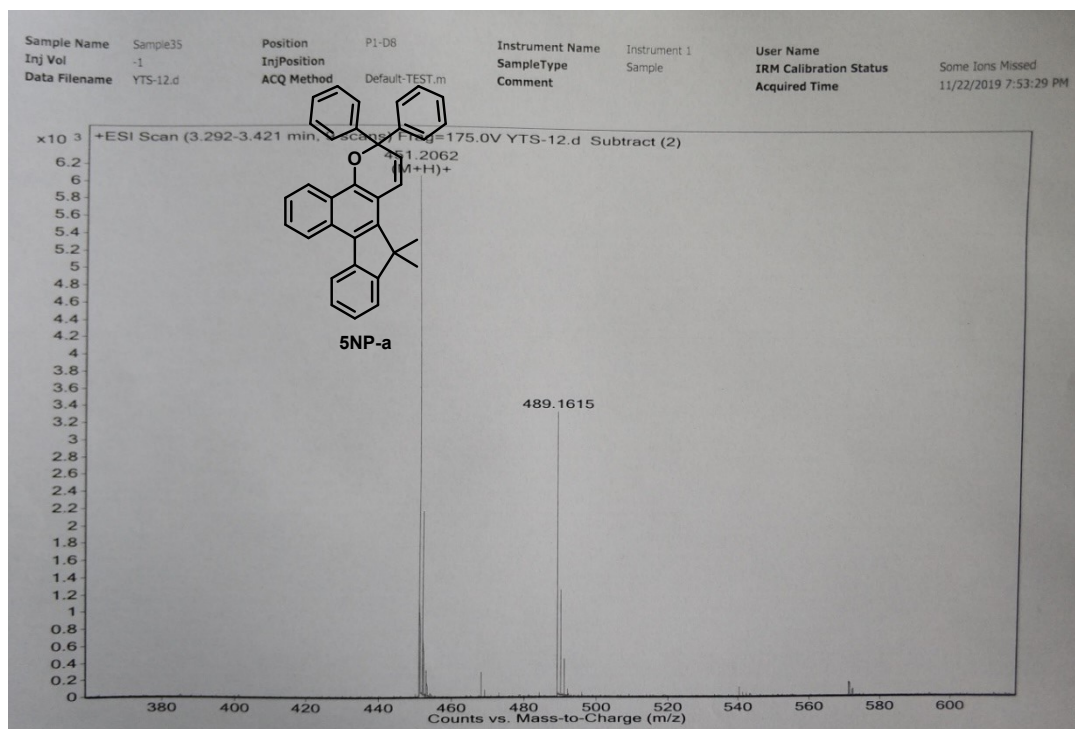

**Fig. S96.** HR-ESI-TOF-MS of 13,13-dimethyl-3,3-diphenyl-3,13-dihydrobenzo [h]indeno[2,1-f]chromene.

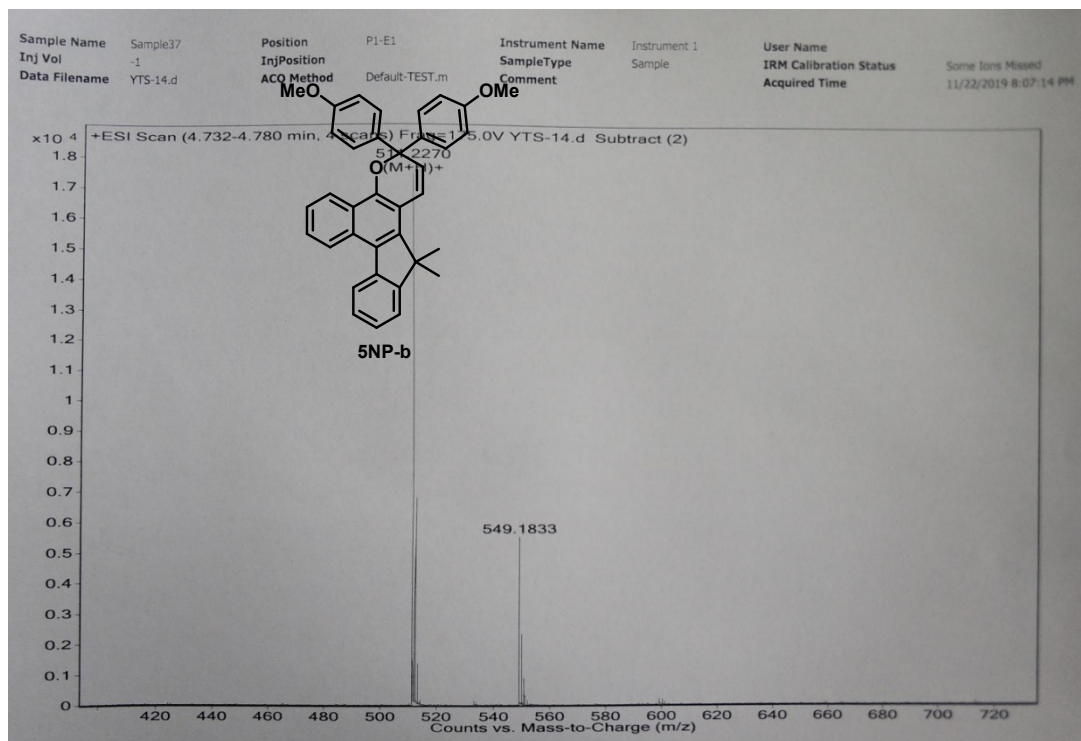

**Fig. S97.** HR-ESI-TOF-MS of 3,3-bis(4-methoxyphenyl)-13,13-dimethyl-3,13-dihydrobenzo[*h*]indeno[2,1-*f*]chromene.

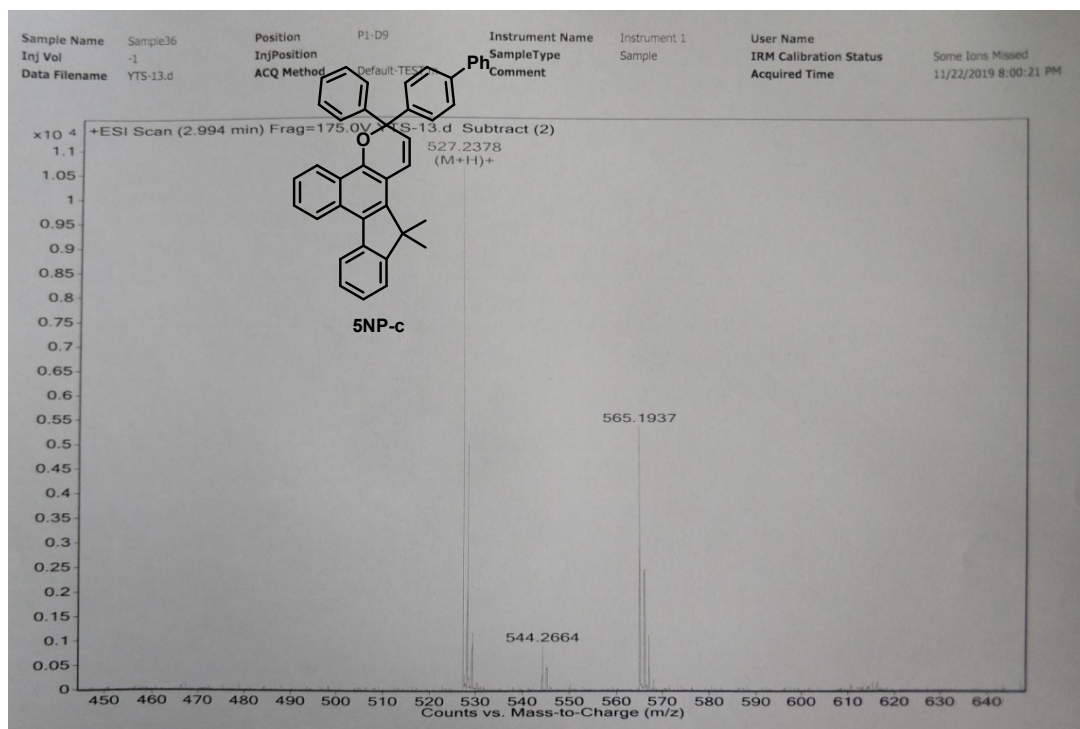

**Fig. S98.** HR-ESI-TOF-MS of 3-([1,1'-biphenyl]-4-yl)-13,13-dimethyl -3-phenyl-3,13-dihydrobenzo[*h*]indeno[2,*l*-*f*]chromene.

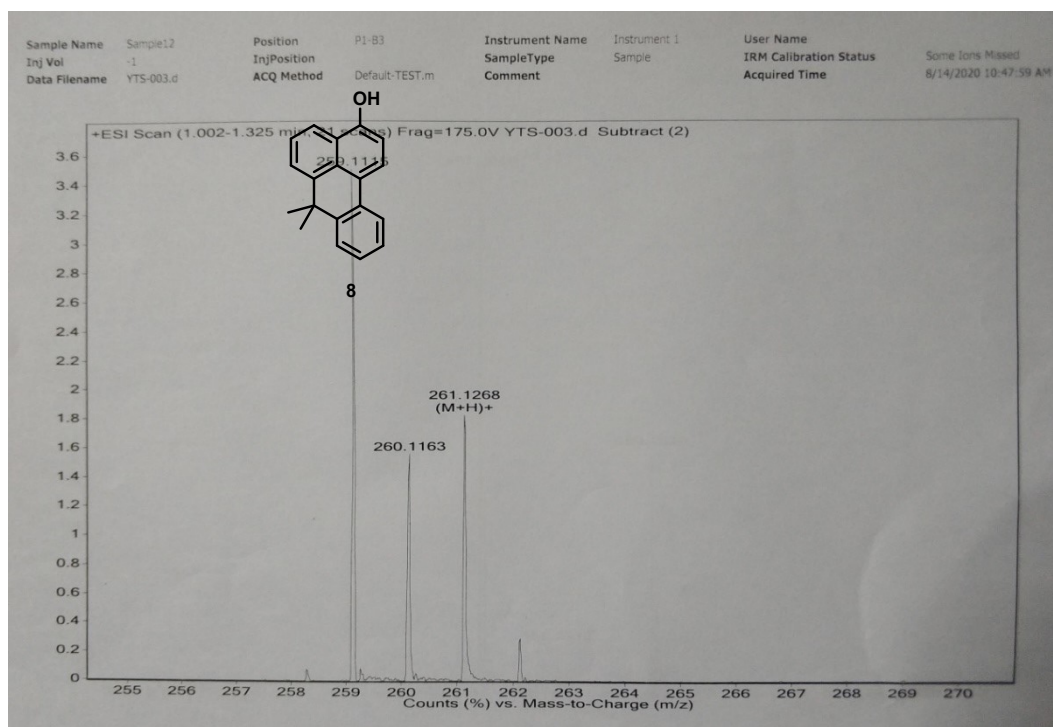

**Fig. S99.** HR-ESI-TOF-MS of 7,7-dimethyl-7H-benzo[de]anthracen-3-ol.

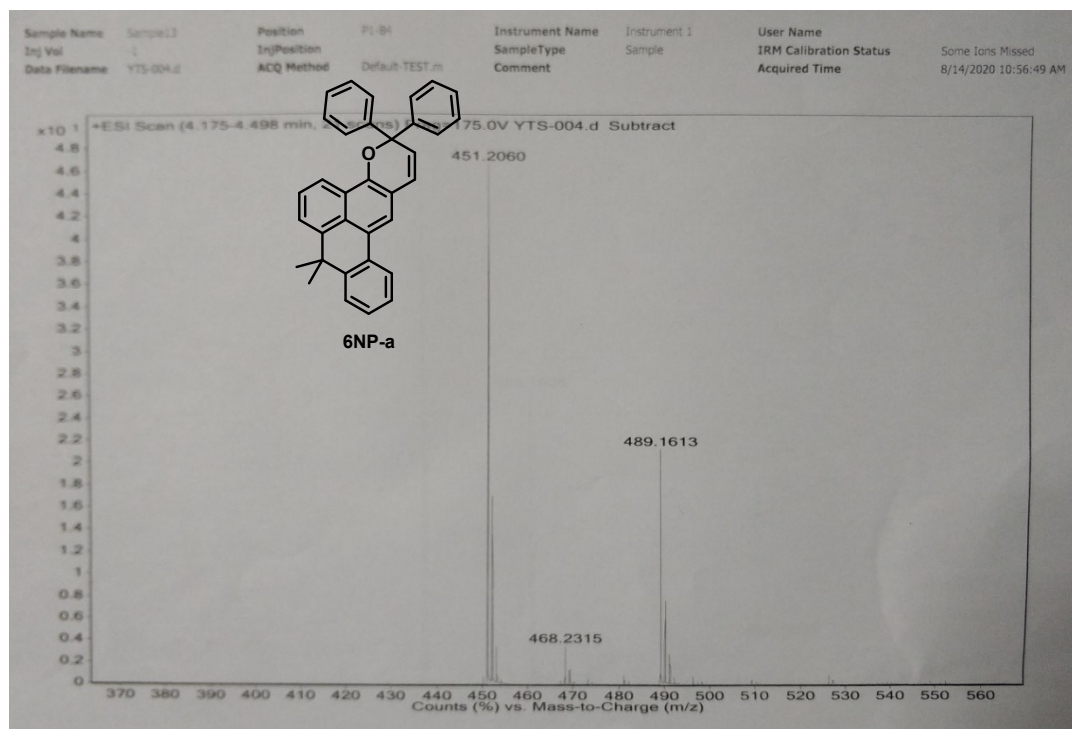

**Fig. S100.** HR-ESI-TOF-MS of **8,8-dimethyl-3,3-diphenyl-3,8-dihydroanthra [9,1-*gh*]chromene**.



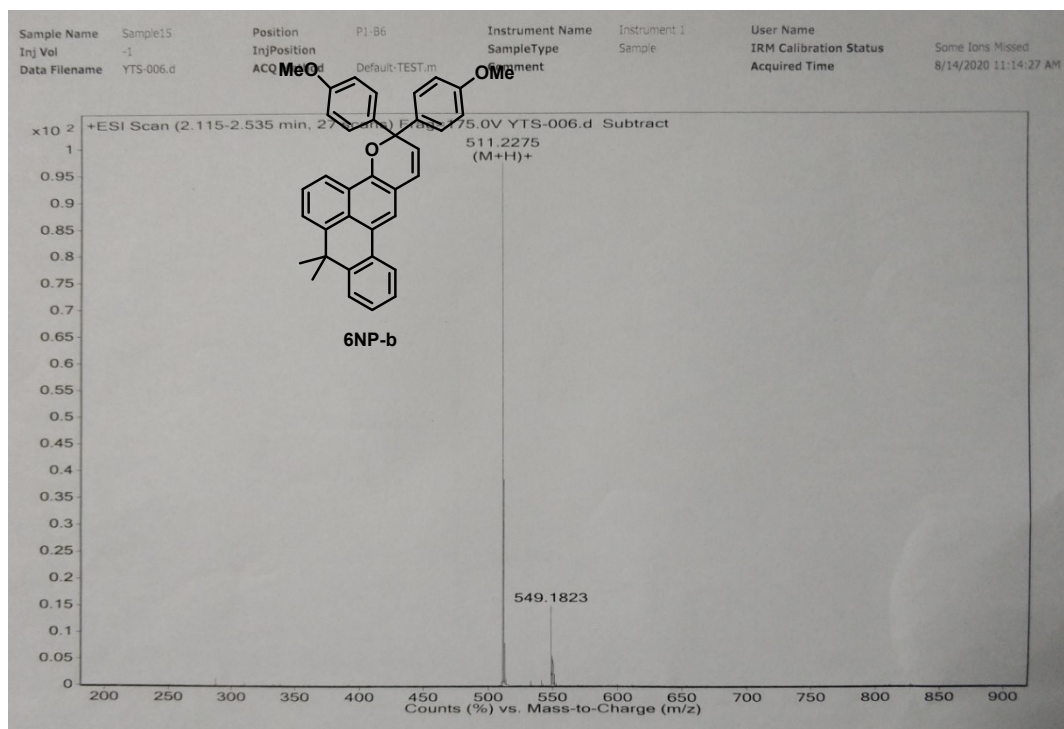

**Fig. S101.** HR-ESI-TOF-MS of **3,3-bis(4-methoxyphenyl)-8,8-dimethyl-3,8-dihydroanthra[9,1-*gh*]chromene**.

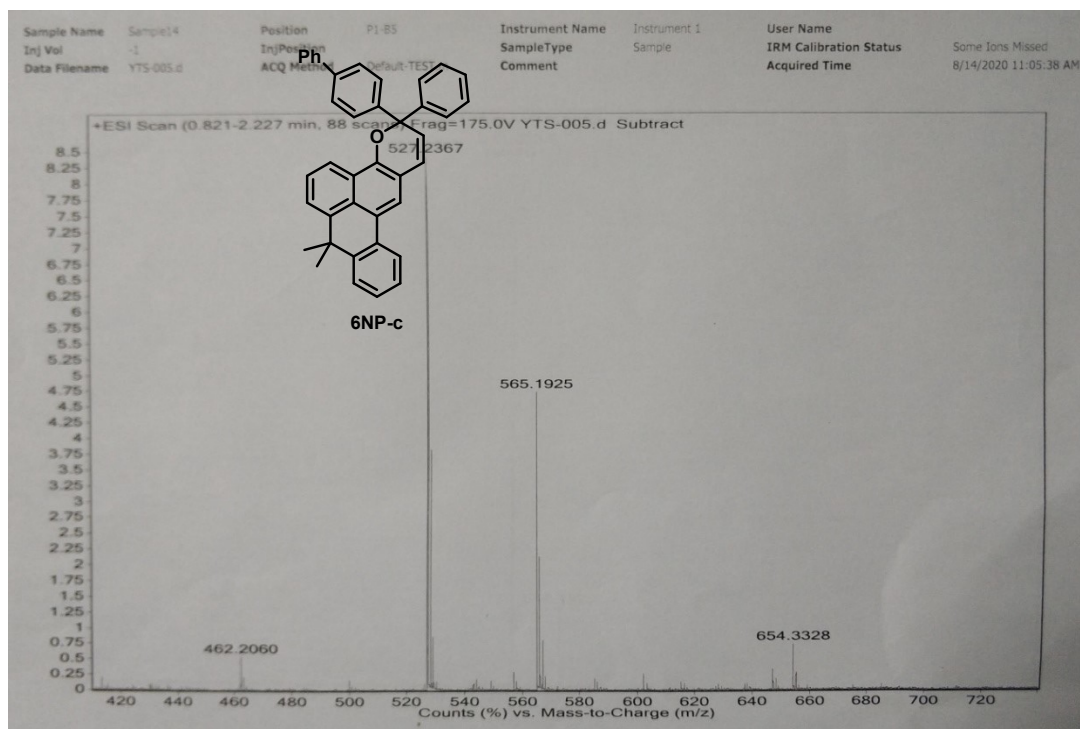

**Fig. S102.** HR-ESI-TOF-MS of 3-([1,1'-biphenyl]-4-yl)-8,8-dimethyl-3-phenyl-3,8-dihydroanthra[9,1-*gh*]chromene.

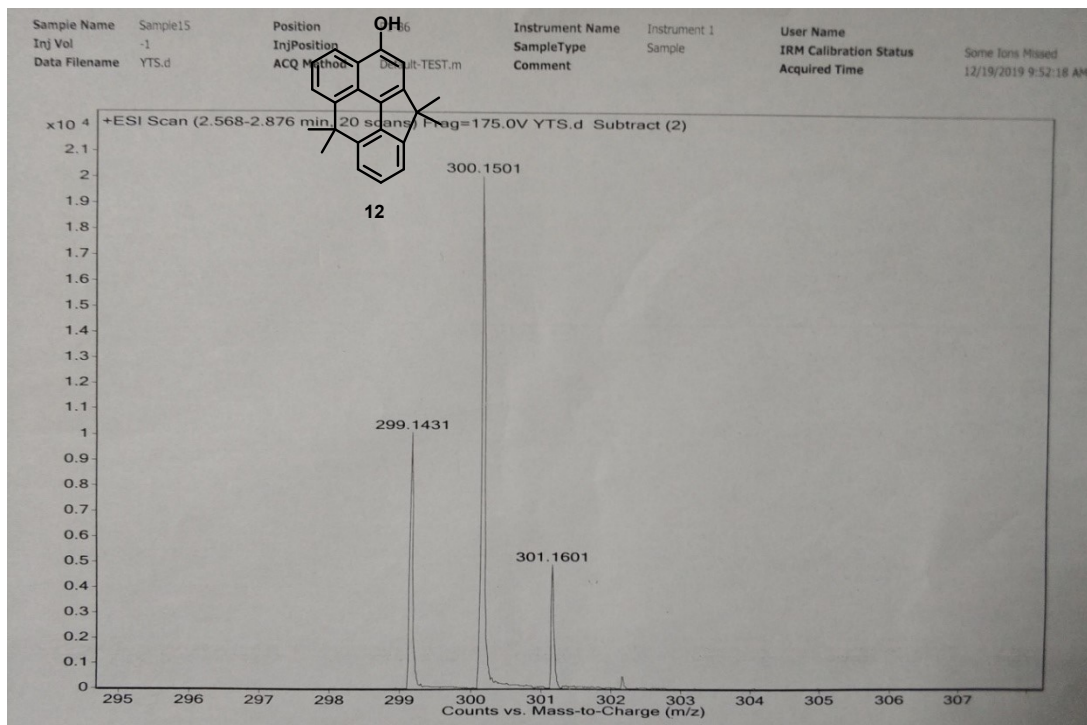

**Fig. S103.** HR-ESI-TOF-MS of **9-methoxy-1,1,5,5-tetramethyl-1,5-dihydrobenzo[*mno*]aceanthrylene.**

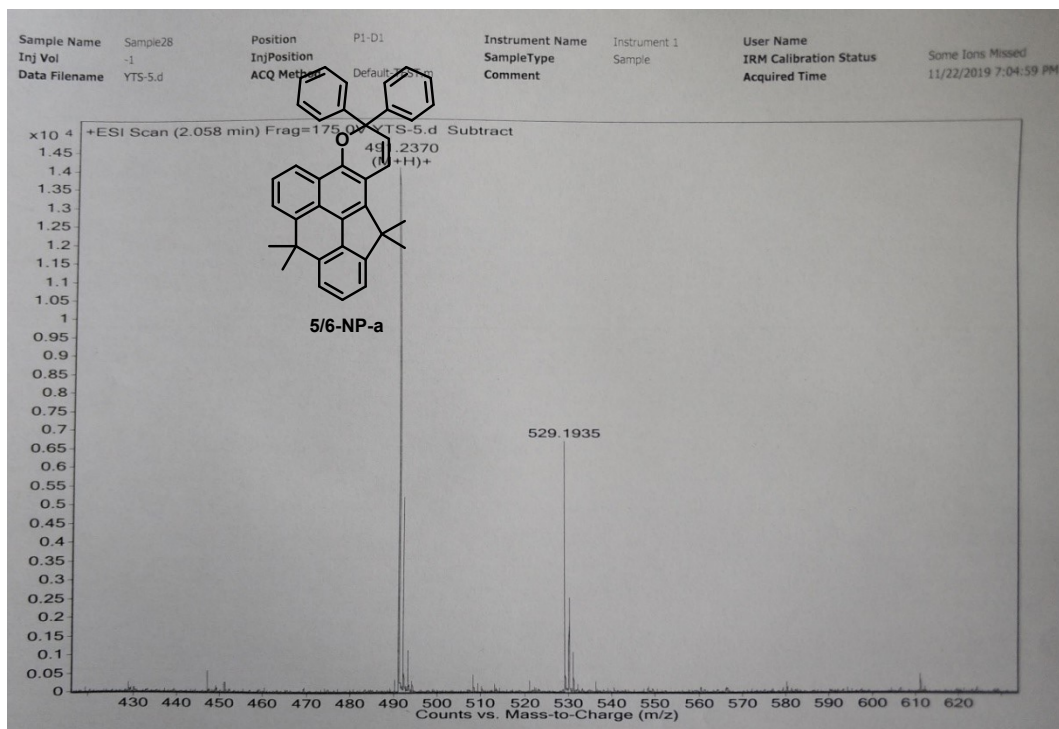

**Fig. S104.** HR-ESI-TOF-MS of 8,8,12,12-tetramethyl-3,3-diphenyl-8,12- dihydro-3*H*-aceanthryleno[1,10-*fgh*]chromene.

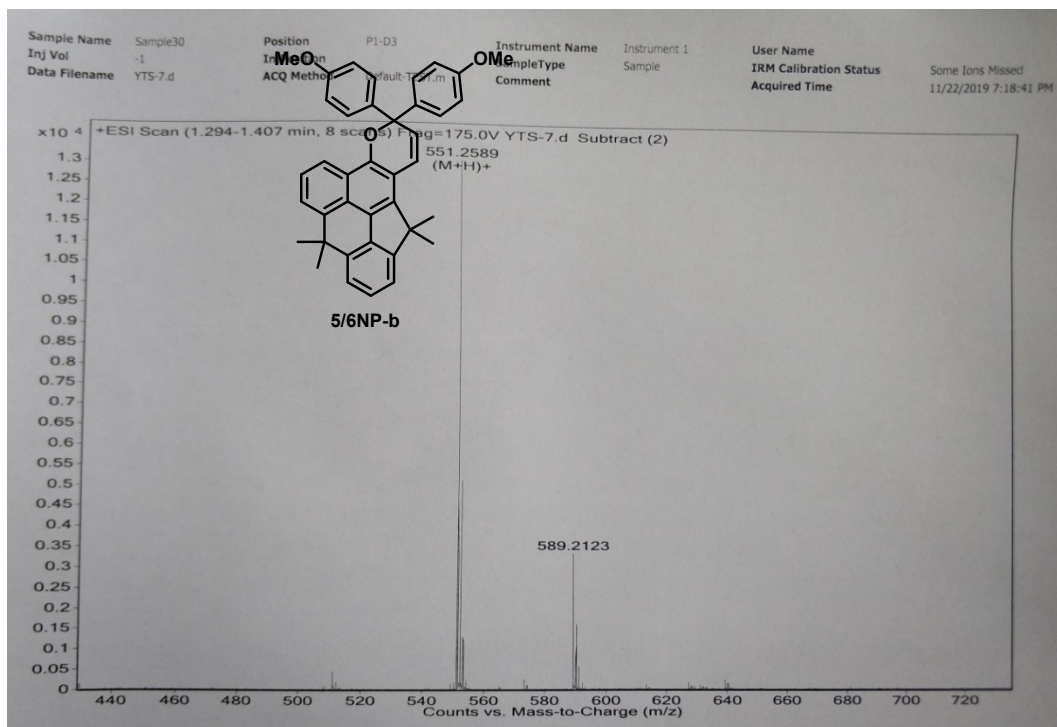

**Fig. S105.** HR-ESI-TOF-MS of 3,3-bis(4-methoxyphenyl)-8,8,12,12-tetra-methyl-8,12-dihydro-3*H*-aceanthryleno[1,10-*fgh*]chromene.

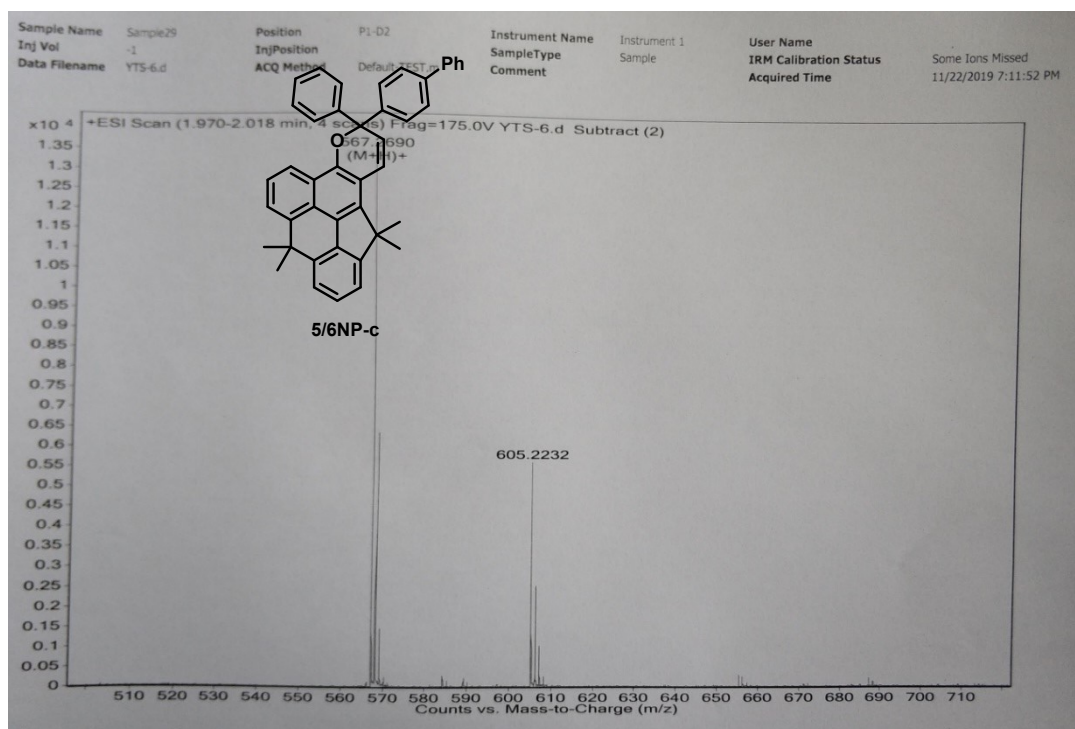

**Fig. S106.** HR-ESI-TOF-MS of 3-([1,1'-biphenyl]-4-yl)-8,8,12,12-te-tramethyl-3-phenyl-8,12-dihydro-3H-aceanthryleno[1,10-*fgh*]chromene

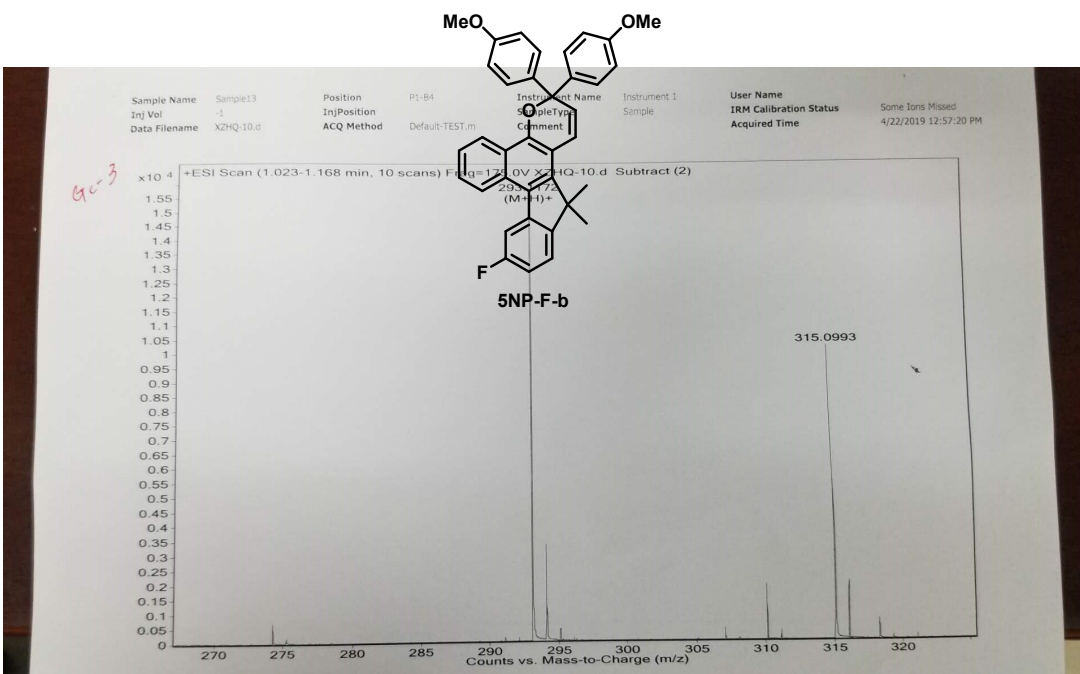

**Fig. S107.** HR-ESI-TOF-MS of 10-fluoro-3,3-bis(4-methoxyphenyl)-13,13-dimethyl-3,13-dihydrobenzo[*h*]indeno[2,1-*f*]chromene.

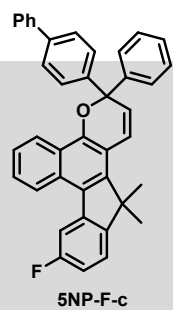

**Fig. S108.** HR-ESI-TOF-MS of 3-([1,1'-biphenyl]-4-yl)-10-fluoro-13,13-dimethyl-3-phenyl-3,13-dihydrobenzo[*h*]indeno[2,1-*f*]chromene.



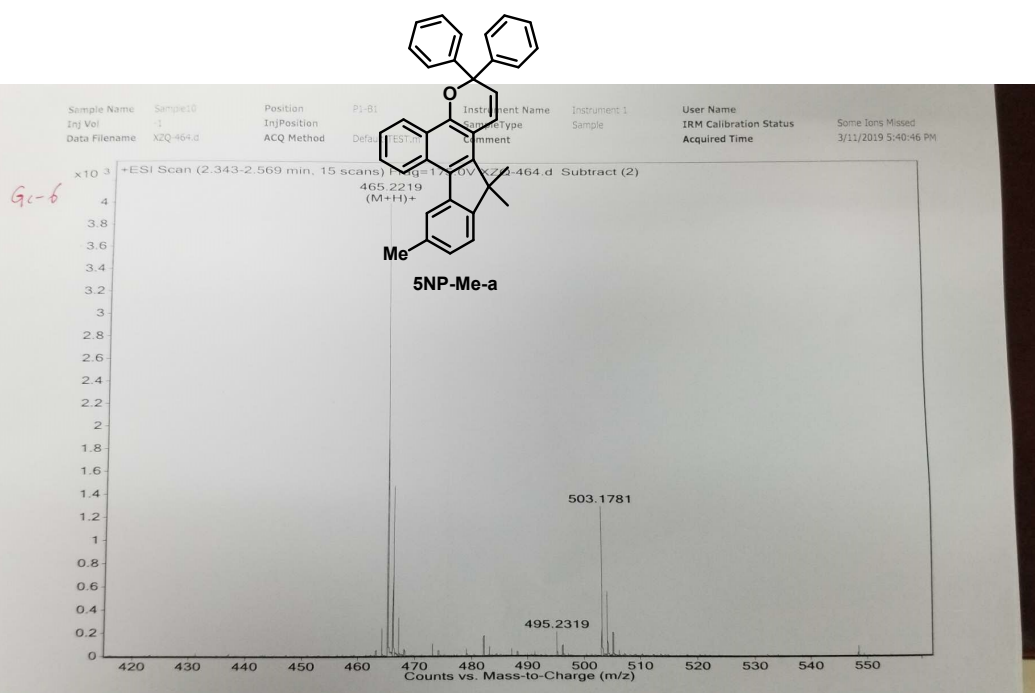

**Fig. S109.** HR-ESI-TOF-MS of 10,13,13-trimethyl-3,3-diphenyl-3,13-dihydro benzo[*h*]indeno[2,1-*f*]chromene.

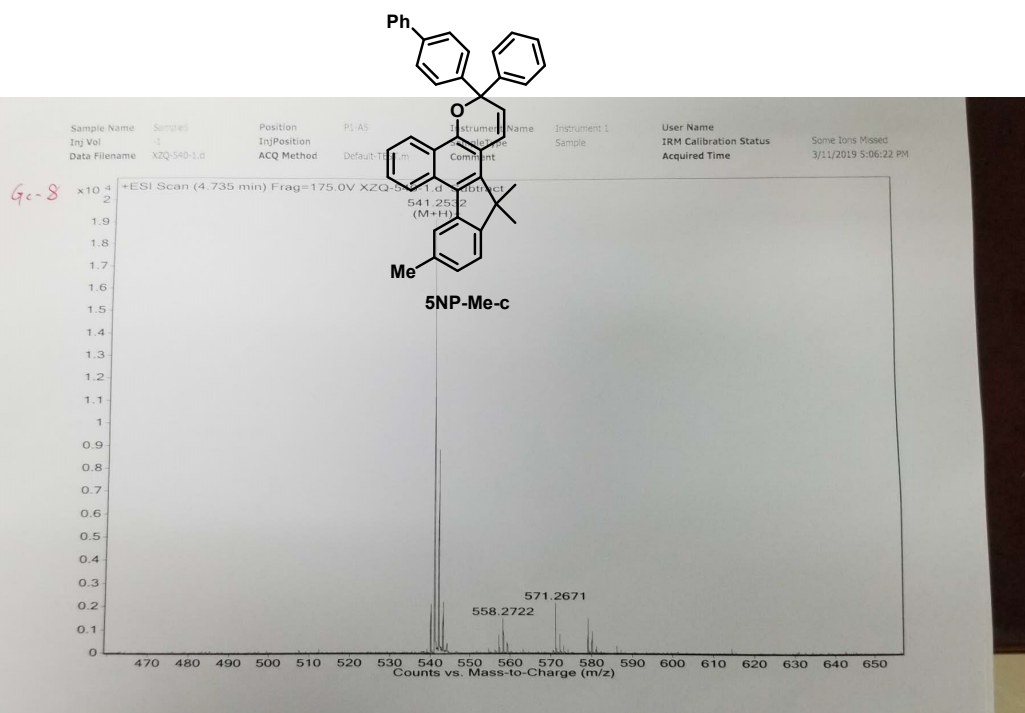

**Fig. S110.** HR-ESI-TOF-MS of 3-([1,1'-biphenyl]-4-yl)-10,13,13-trimethyl -3-phenyl-3,13-dihydrobenzo[*h*]indeno[2,1-*f*]chromene.

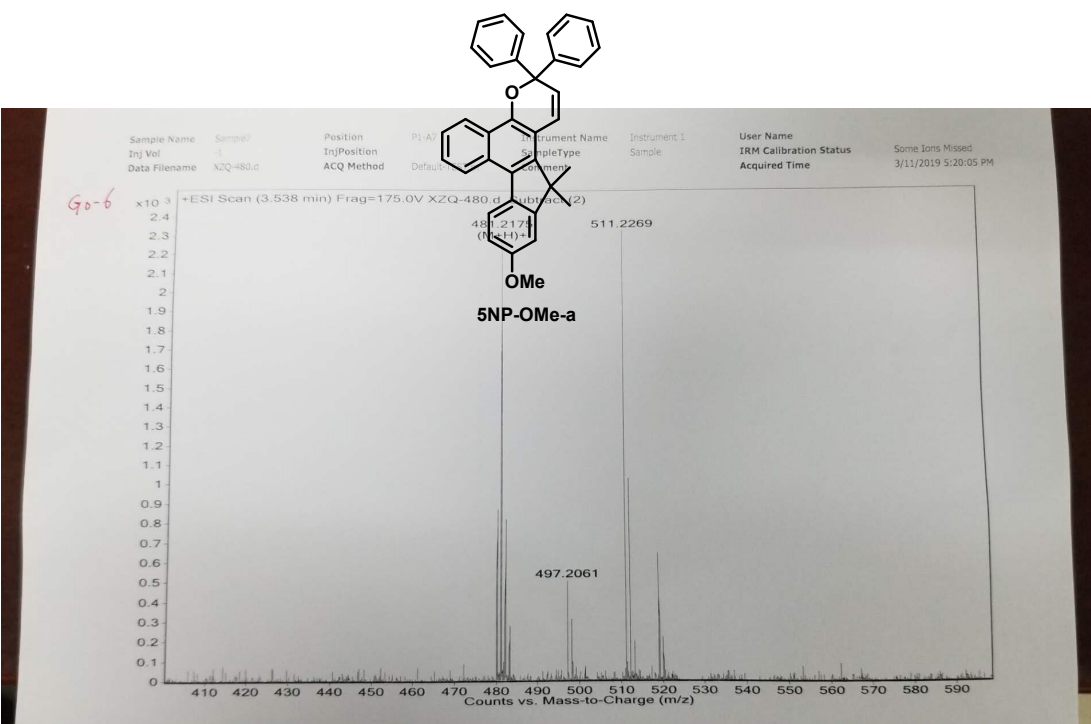

**Fig. S111.** HR-ESI-TOF-MS of 11-methoxy-13,13-dimethyl-3,3-diphenyl-3,13-dihydrobenzo[*h*]indeno[2,1-*f*]chromene.

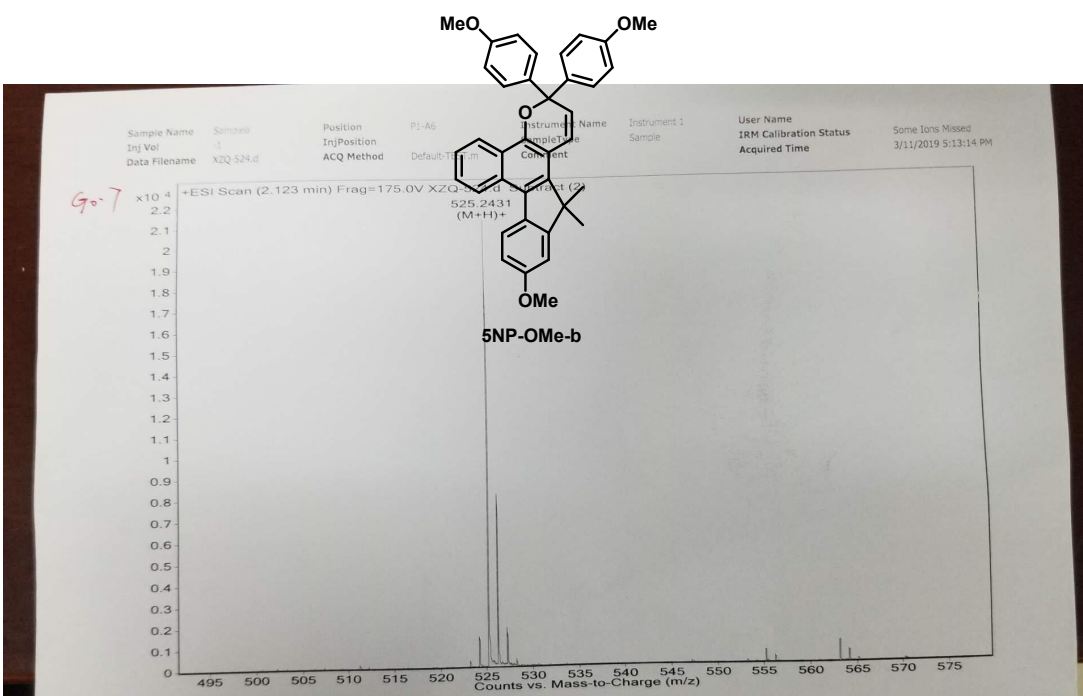

**Fig. S112.** HR-ESI-TOF-MS of 11-methoxy-3,3-bis(4-methoxyphenyl)-13,13-dimethyl-3,13-dihydrobenzo[*h*]indeno[2,1-*f*]chromene.

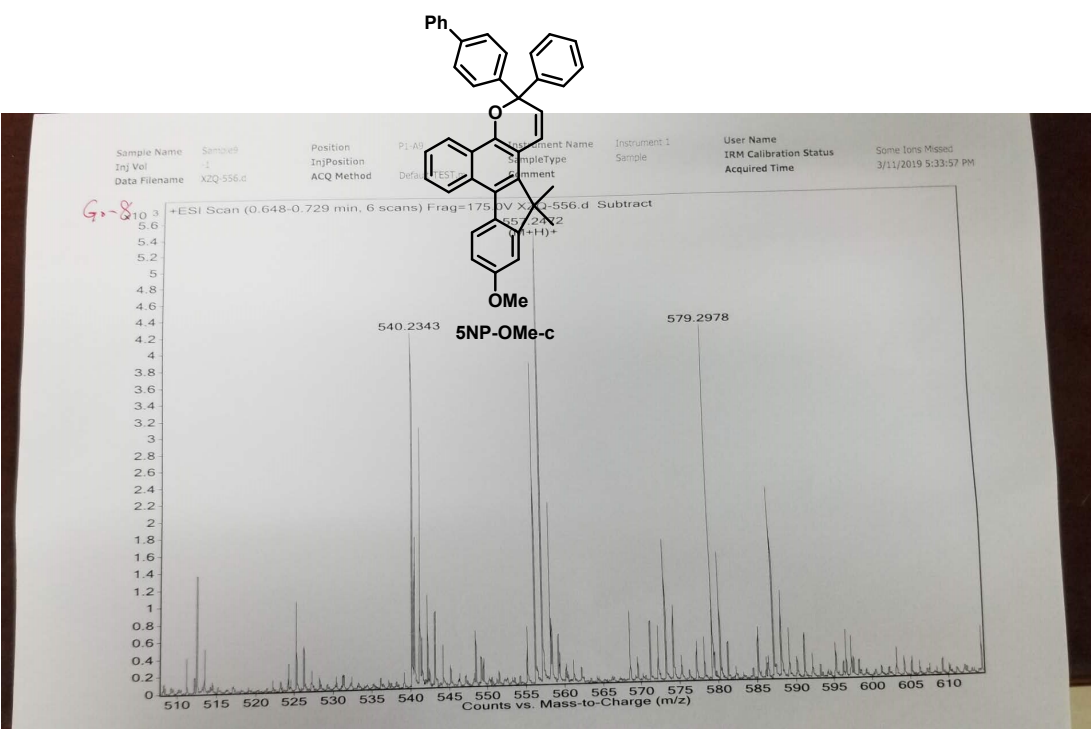

**Fig. S113.** HR-ESI-TOF-MS of 3-([1,1'-biphenyl]-4-yl)-11-methoxy-13,13-dimethyl-3-phenyl-3,13-dihydrobenzo[*h*]indeno[2,1-*f*]chromene.

## 6. Transient UV–Vis Absorption Spectroscopy

**Table S2.** Reaction Kinetics Parameters for the Thermal Back Reaction of the Colored Species of NPs in ethyl acetate ( $8.0 \times 10^{-5}$  M) at 298 K.

| compounds | $A_1$ | $k_1$ | $A_2$ | $k_2$   |
|-----------|-------|-------|-------|---------|
| NP-a      | 0.42  | 0.14  | 0.42  | 0.0014  |
| NP-b      | 0.99  | 0.188 | 0.02  | 0.00002 |
| NP-c      | 0.63  | 0.128 | 0.35  | 0.0031  |
| 5NP-a     | 0.31  | 0.036 | 0.02  | 0.0004  |
| 5NP-b     | 6.93  | 0.315 | 0.07  | 0.0068  |
| 5NP-c     | 0.98  | 0.050 | 0.02  | 0.0009  |
| 6NP-a     | 2.07  | 0.036 | 0.93  | 0.0001  |
| 6NP-b     | 1.25  | 0.184 | 0.08  | 0.0001  |
| 6NP-c     | 1.24  | 0.036 | 0.44  | 0.00012 |
| 5/6NP-a   | 0.90  | 0.063 | 0.20  | 0.0002  |
| 5/6NP-b   | 2.73  | 0.612 | 0.27  | 0.00012 |
| 5/6NP-c   | 1.72  | 0.092 | 0.33  | 0.00002 |
| 5NP-F-a   | 0.06  | 0.074 | 0.02  | 0.00015 |
| 5NP-F-b   | 5.17  | 0.717 | 0.16  | 0.00003 |
| 5NP-F-c   | 0.96  | 0.109 | 0.21  | 0.00009 |
| 5NP-Me-a  | 0.56  | 0.317 | 0.46  | 0.00908 |
| 5NP-Me-b  | 5.50  | 0.229 | 0.05  | 0.00035 |
| 5NP-Me-c  | 0.58  | 0.239 | 0.11  | 0.00004 |
| 5NP-OMe-a | 0.05  | 0.136 | 0.02  | 0.00016 |
| 5NP-OMe-b | 0.32  | 0.142 | 0.04  | 0.00016 |
| 5NP-OMe-c | 1.05  | 0.196 | 0.20  | 0.00061 |
| PMMA film | 0.93  | 0.145 | 0.03  | 0.00426 |

The half-lives ( $\tau_{1/2}$  at 298 K) of the TC form were determined from the fitting curves of the time variation of the absorbance using the following biexponential equation, where  $k_1$  is the rate constant for the thermal back reaction of the TC form and  $k_2$  is that of the TT form.

$$f(t) = A_1 e^{-k_1 t} + A_2 e^{-k_2 t} + A_0$$

The generation ratio of the TT form was defined as  $A_2/(A_1+A_2)$  by assuming the molar extinction coefficients of the TC and TT forms are same.

## 7. DFT Calculations

All calculations were carried out using the Gaussian 09 program (Revision D.01). The molecular structure was fully optimized at the M06-2X/6-31+G(d,p) level of the theory, and analytical second derivative was computed using vibrational analysis to confirm each stationary point to be a minimum. TDDFT calculations were performed at the MPW1PW91/6-31+G(d,p) level of the theory for the optimized structures. TDDFT calculations were performed at the MPW1PW91/6-31+G(d,p) level of the theory for the optimized structures.

### 7.1 The Calculated UV-vis Absorption Spectra

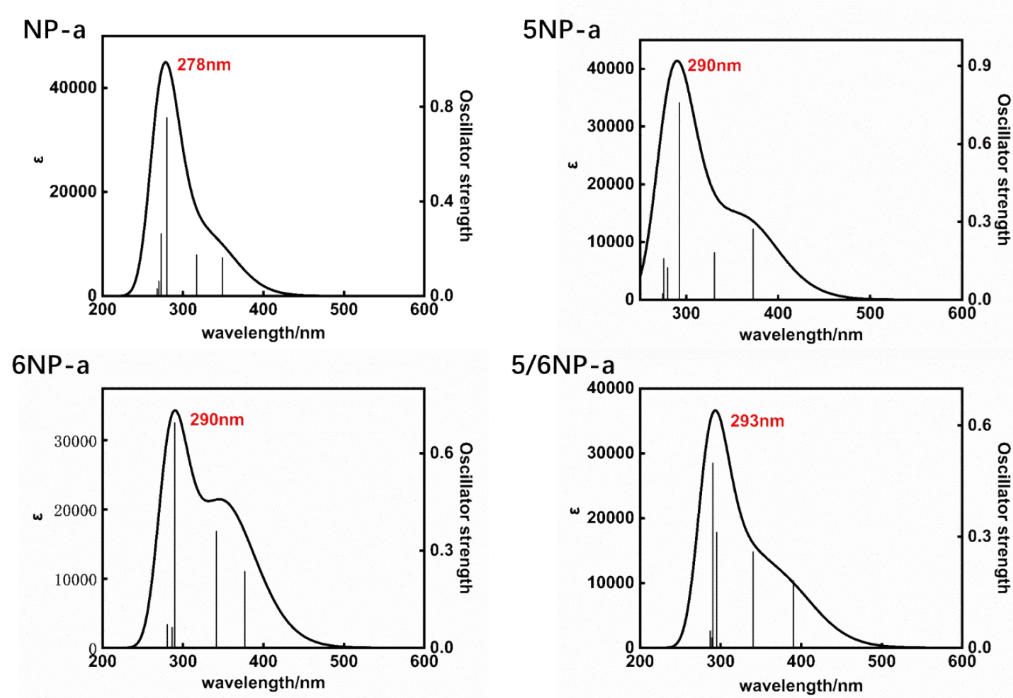

**Fig. S114.** UV-vis absorption spectra of the CFs for (a) NP-a, (b) 5NP-a, (c) 6NP-a and (d) 5/6NP-a in ethyl acetate solutions. The calculated spectra (MPW1PW91/6-

31+G(d// M06-2X/6-31+G(d,p) level of the theory) are shown.

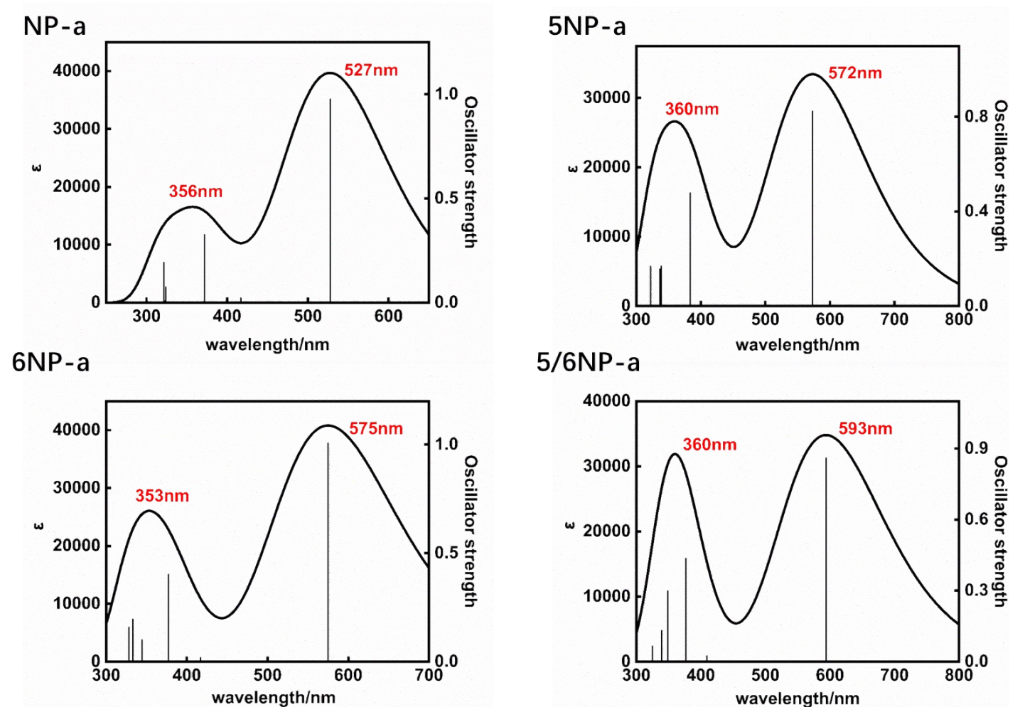

**Fig. S115.** UV-vis absorption spectra of the TCs for (a) NP-a, (b) 5NP-a, (c) 6NP-a and (d) 5/6NP-a in ethyl acetate solutions. The calculated spectra (MPW1PW91/6-31+G(d// M06-2X/6-31+G(d,p) level of the theory) are shown.

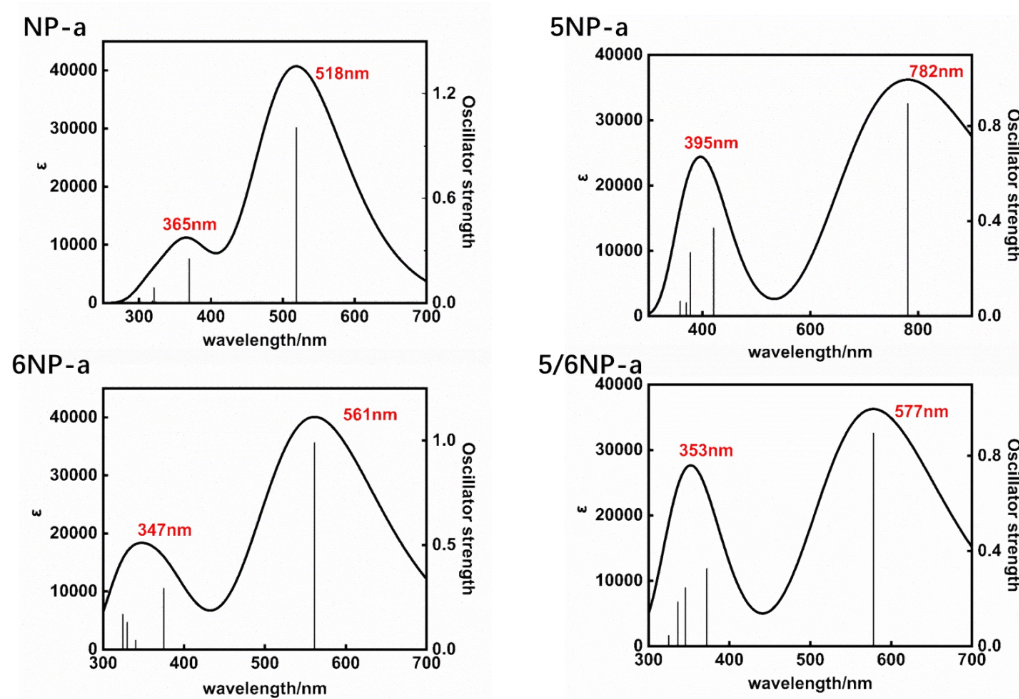

**Fig. S116.** UV-vis absorption spectra of the TTs for (a) NP-a, (b) 5NP-a, (c) 6NP-a and (d) 5/6NP-a in ethyl acetate solutions. The calculated spectra (MPW1PW91/6-



31+G(d)// M06-2X/6-31+G(d,p) level of the theory) are shown.

## 7.2 Calculated Structures

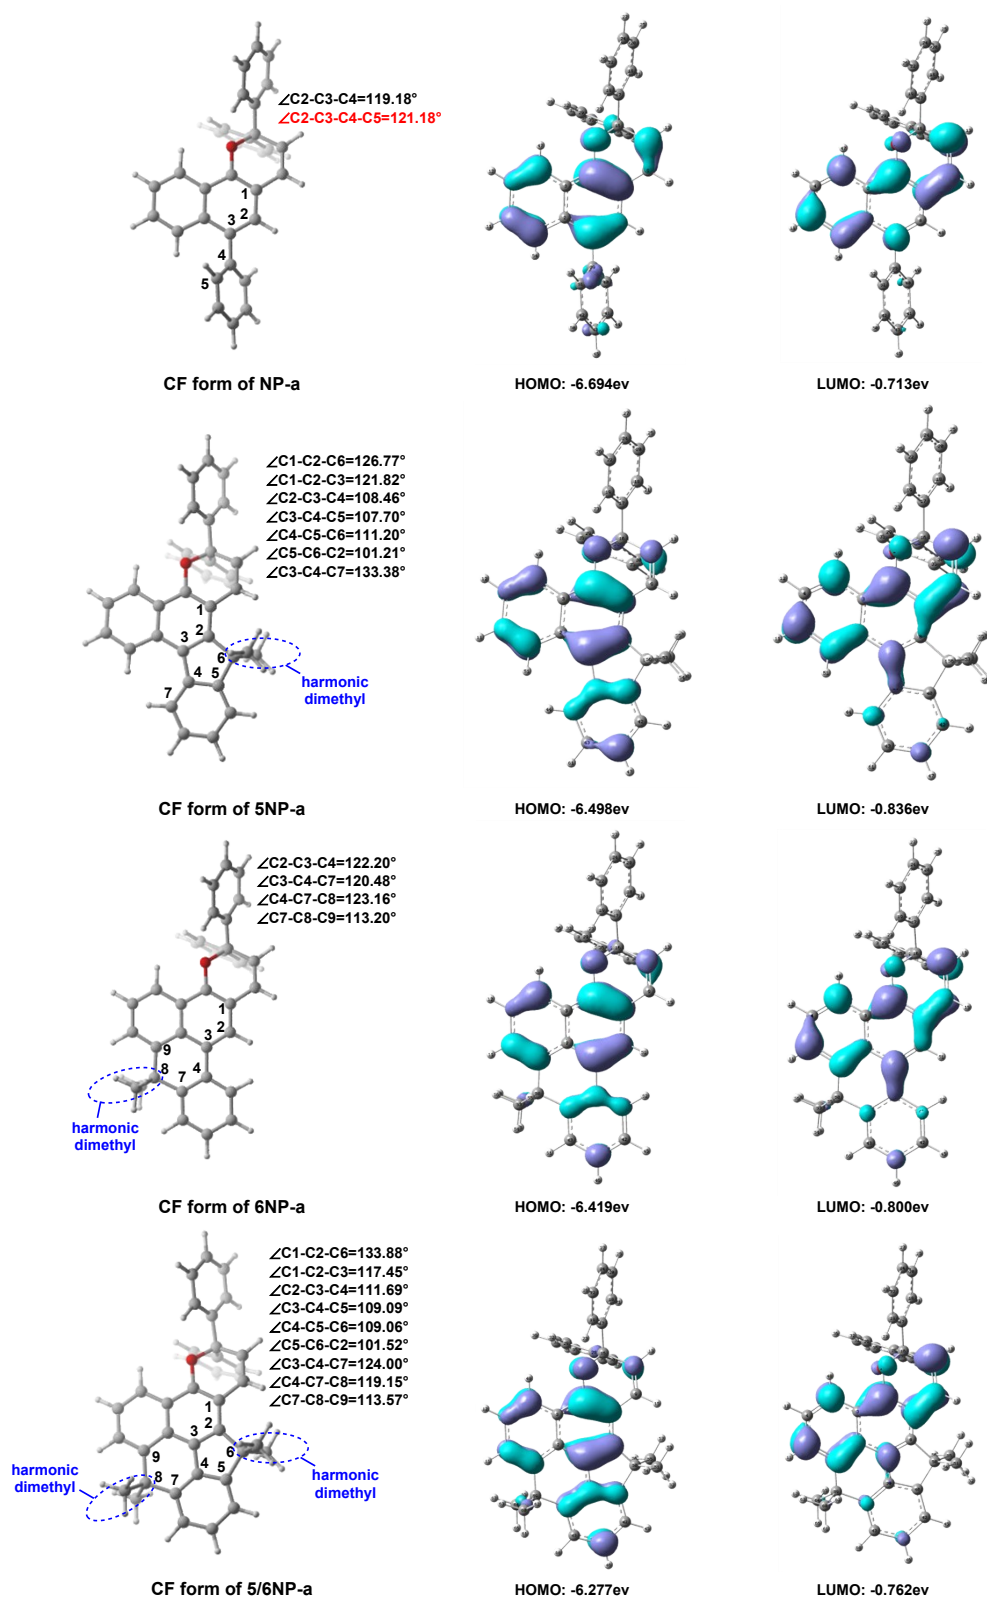

Fig. S117. Calculated structure and orbit of NP-a, 5NP-a, 6NP-a and 5/6NP-a at the

M06-2X/6-31+G(d,p) level of theory. All energies are in kcal/mol, and bond lengths are in Å.

### 7.3 Calculated Potential Energy Surface

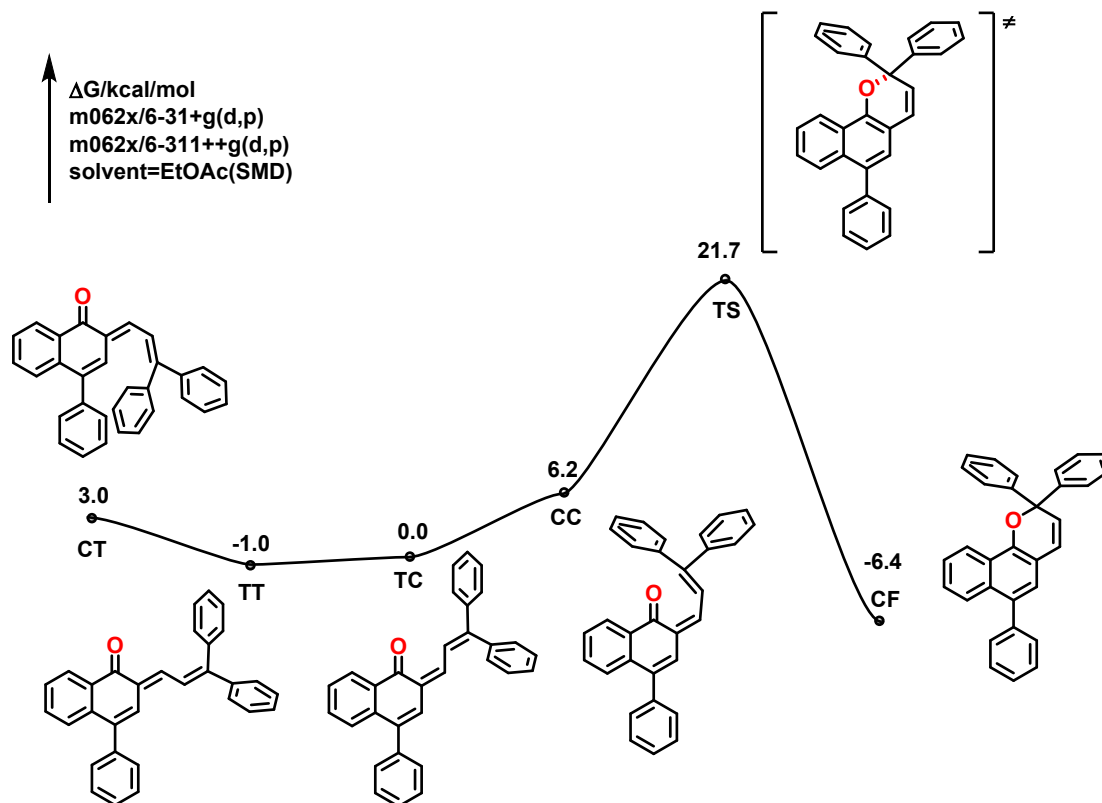

**Fig. S118.** Calculated potential energy surface for decolorization reaction of NP-a at the (SMD)M06-2X/6-311++G(d,p)/M06-2X/6-31+G(d,p) level of theory.

### 7.4 Calculated Intrinsic Reaction Coordinate (IRC) of NP-a-TS

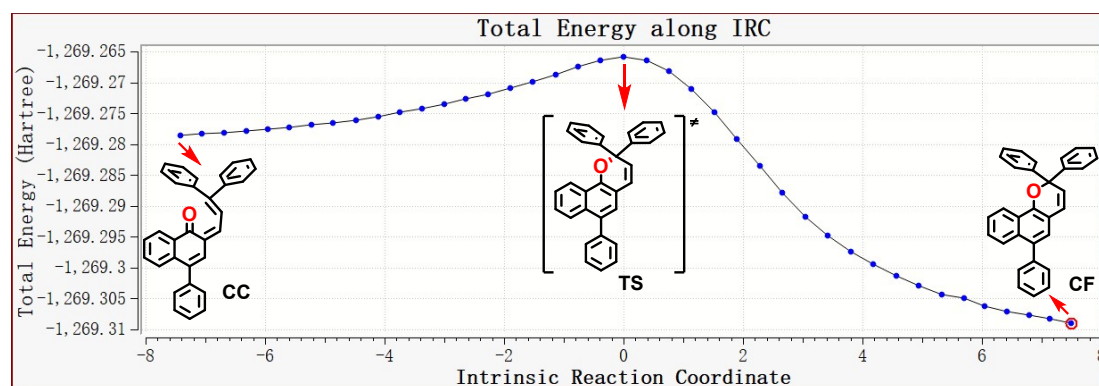

**Fig. S119.** Calculated Intrinsic Reaction Coordinate (IRC) of NP-a-TS at the M06-2X/6-31+G(d,p) level of theory.

## 7.5 Calculated TC, TT and TS form structures

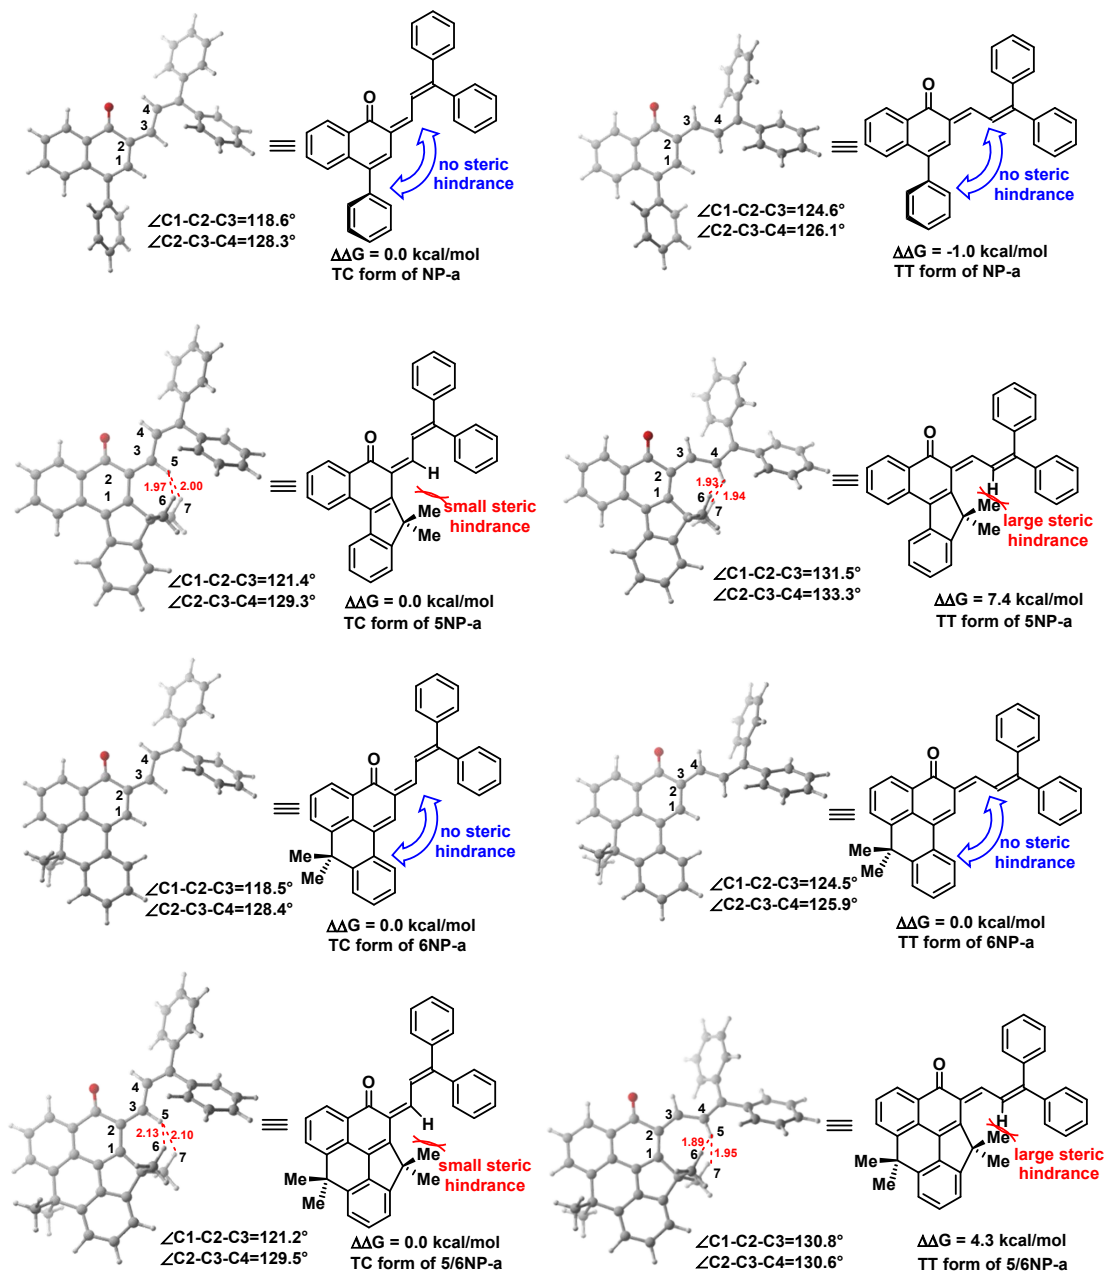

**Fig. S120.** Calculated TC and TT form structures of NP-a, 5NP-a, 6NP-a and 5/6NP-a at the (SMD)m06-2x/6-311++g(d,p)//m06-2x/6-31+g(d,p) level of theory. All energies are in kcal/mol, and bond lengths are in Å.

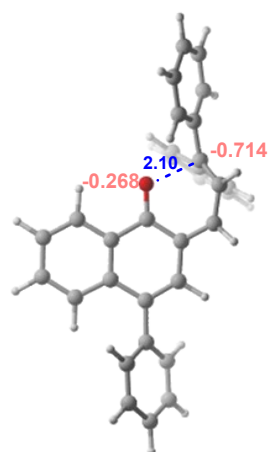

$\Delta\Delta G = 21.7$  kcal/mol  
 LUMO: -0.06650ev  
 HOMO: -0.23097ev  
 TS form of NP-a

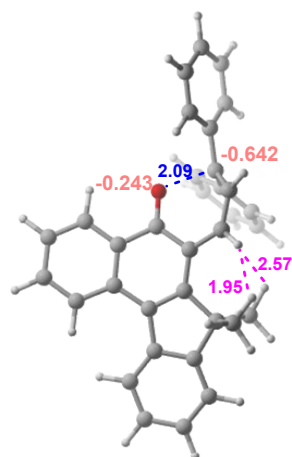

$\Delta\Delta G = 21.5$  kcal/mol  
 LUMO: -0.06733ev  
 HOMO: -0.22368ev  
 TS form of 5NP-a

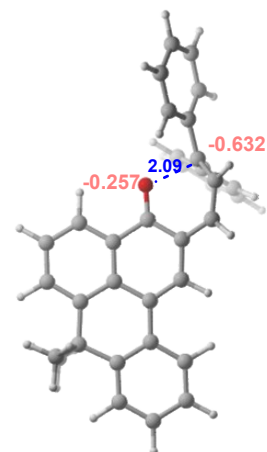

$\Delta\Delta G = 22.3$  kcal/mol  
 LUMO: -0.06654ev  
 HOMO: -0.22304ev  
 TS form of 6NP-a

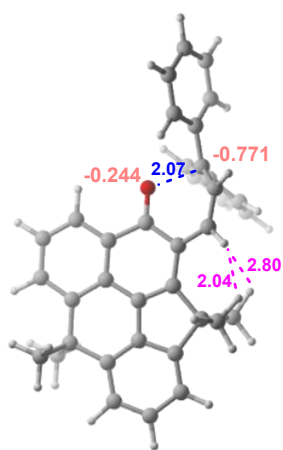

$\Delta\Delta G = 24.5$  kcal/mol  
 LUMO: -0.06365ev  
 HOMO: -0.21679ev  
 TS form of 5/6NP-a

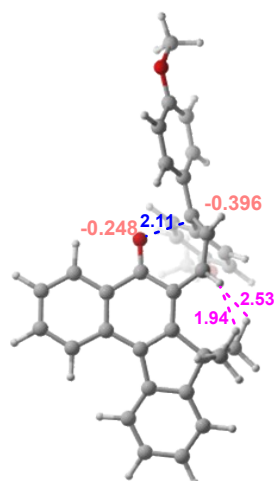

$\Delta\Delta G = 20.1$  kcal/mol  
 LUMO: -0.06224ev  
 HOMO: -0.21640ev  
 TS form of 5NP-b

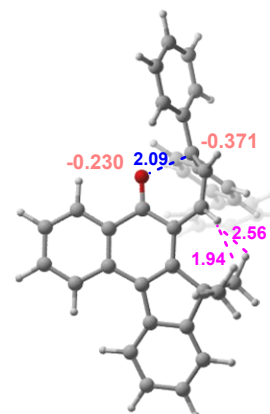

$\Delta\Delta G = 20.9$  kcal/mol  
 LUMO: -0.06834ev  
 HOMO: -0.22321ev  
 TS form of 5NP-c

**Fig. S121.** Calculated structure, orbit and the Gibbs free energy for transient state of decolorization reaction of several naphthopyran derivatives. All energies are in kcal/mol, and bond lengths are in Å.

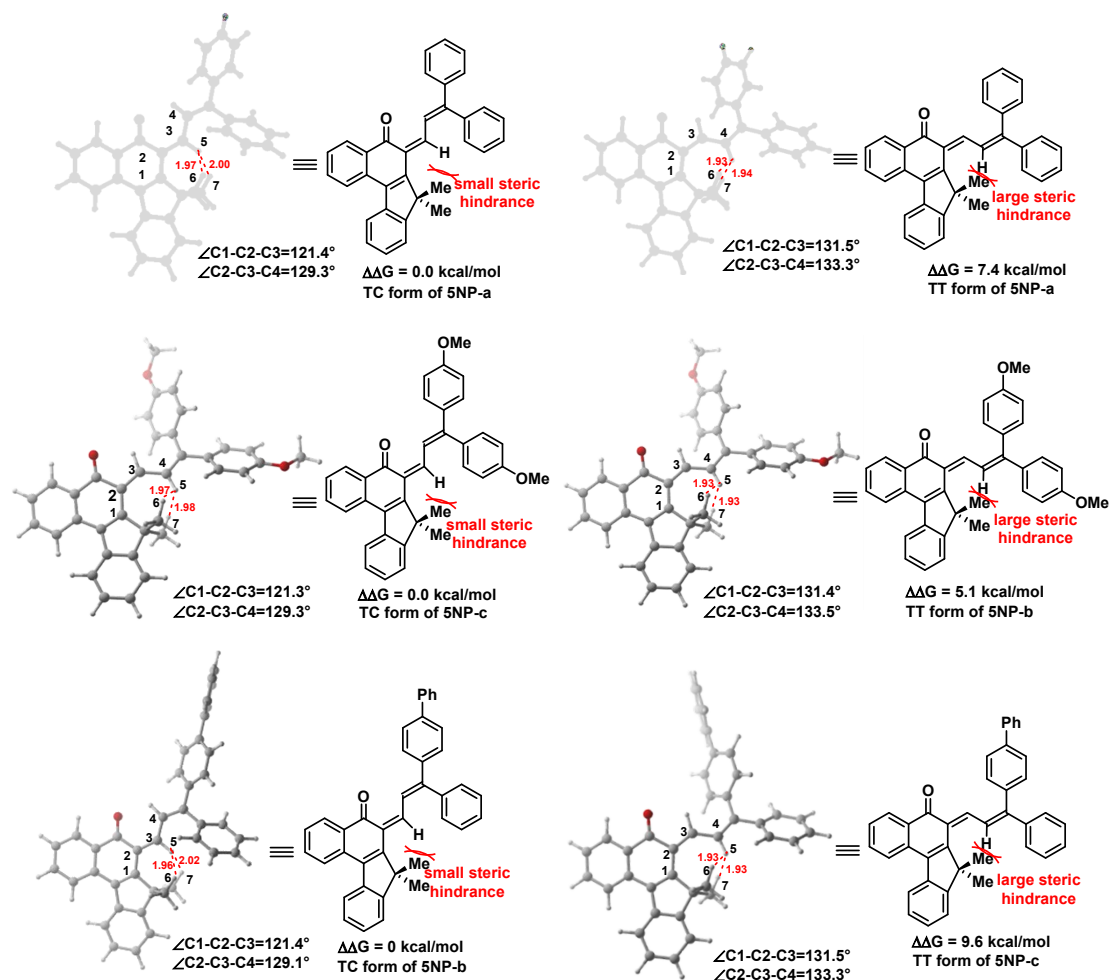

**Fig. S122.** Calculated TC and TT form structures of **5NP-a**, **5NP-b** and **5NP-c** at the (SMD)m06-2x/6-311++g(d,p)//m06-2x/6-31+g(d,p) level of theory. All energies are in kcal/mol, and bond lengths are in Å.

## 7.6 Calculated Cartesian Coordinates and Thermodynamic Energy

### NP-a-CF

C,0,2.4030973849,2.917111605,0.754580483  
 C,0,1.872038136,0.7013250748,-0.1043310485  
 C,0,0.4952110625,1.0714794014,-0.1261140731  
 C,0,1.0377561654,3.282739823,0.700613487  
 C,0,2.2561648635,-0.6195312371,-0.5185069293  
 C,0,-0.4652117527,0.1079861216,-0.535748695  
 C,0,-0.0938327736,-1.166801882,-0.9128425459  
 C,0,1.2803206069,-1.5114994909,-0.8973816411  
 C,0,-1.1464579117,-2.0572673969,-1.3926017858  
 C,0,-2.4278817774,-1.7469342258,-1.1686444647  
 H,0,3.1369717957,3.6312980539,1.1148643028  
 H,0,0.7319803886,4.2770773,1.0100047624  
 H,0,-3.2491950029,-2.3630479475,-1.5210371594

O,0,-1.7632391748,0.511498339,-0.6146218844  
H,0,-0.8675937063,-2.951097424,-1.9445873805  
C,0,-2.7667970355,-0.4962224591,-0.3779096293  
C,0,-4.0775936072,0.0898700322,-0.899344716  
C,0,-5.2969917453,-0.3909102267,-0.4153002928  
C,0,-4.0744325189,1.0496464142,-1.9127471246  
C,0,-6.4983997537,0.0823843867,-0.9379240609  
H,0,-5.3072993326,-1.1288708914,0.3826378258  
C,0,-5.2782447341,1.5297067334,-2.4272790691  
H,0,-3.1280734628,1.4200749048,-2.2906774524  
C,0,-6.4925985997,1.0471249489,-1.9442894692  
H,0,-7.4390780952,-0.2970456541,-0.5511781031  
H,0,-5.264344665,2.2818578634,-3.2100373625  
H,0,-7.4285206483,1.4214505593,-2.3469903999  
C,0,-2.8291808796,-0.7396756319,1.1355764295  
C,0,-3.0159254695,0.3698725946,1.9681724421  
C,0,-2.7096996728,-2.0048256612,1.7050557578  
C,0,-3.0803258791,0.2147357856,3.3474711969  
H,0,-3.1102934099,1.3562266046,1.5211140501  
C,0,-2.7835240847,-2.1636490364,3.0915910616  
H,0,-2.5511522805,-2.8708043897,1.0702440315  
C,0,-2.9671116344,-1.0573357725,3.9139281254  
H,0,-3.2208233414,1.0833924332,3.9831662285  
H,0,-2.6895249993,-3.1548578508,3.52424029  
H,0,-3.0198180406,-1.1804497327,4.991144398  
C,0,3.6822985216,-1.0420738171,-0.563350154  
C,0,4.1068907627,-2.1731401672,0.1428974898  
C,0,5.4313222533,-2.6024268187,0.0711127244  
C,0,5.9386852956,-0.7779038624,-1.4193397563  
C,0,6.3514510311,-1.9051478252,-0.7086500079  
H,0,5.7443671451,-3.4792123428,0.6296438698  
H,0,7.3832213705,-2.237587254,-0.7643883684  
C,0,0.1005839863,2.3739858319,0.2761513116  
H,0,-0.9538062951,2.6261992111,0.246979487  
H,0,1.5696992477,-2.5064500977,-1.2285202529  
H,0,3.3916493364,-2.7085661216,0.7612677441  
H,0,6.6472067775,-0.234157816,-2.0366633109  
C,0,4.6156910541,-0.3505008603,-1.3471242337  
H,0,4.292158226,0.5190244535,-1.9132265122  
C,0,2.8078682187,1.6620788023,0.3668460939  
H,0,3.8555457445,1.3890001853,0.4316749907

Zero-point correction=

Thermal correction to Energy=

Thermal correction to Enthalpy=

0.438287 (Hartree/Particle)

0.462276

0.463220

|                                              |              |
|----------------------------------------------|--------------|
| Thermal correction to Gibbs Free Energy=     | 0.382150     |
| Sum of electronic and zero-point Energies=   | -1268.875894 |
| Sum of electronic and thermal Energies=      | -1268.851905 |
| Sum of electronic and thermal Enthalpies=    | -1268.850961 |
| Sum of electronic and thermal Free Energies= | -1268.932030 |

### 5NP-a-CF

C,0,1.6202620372,4.1653971444,-0.1711470015  
 C,0,1.6427653051,1.7342071307,-0.3371352008  
 C,0,0.2202877097,1.7634614609,-0.4427765018  
 C,0,0.209688176,4.1786978524,-0.2470947885  
 C,0,2.296448055,0.4624789083,-0.3711318019  
 C,0,-0.4870477118,0.541491024,-0.6082926857  
 C,0,0.1547690405,-0.6815485691,-0.7123293615  
 C,0,1.5675585888,-0.6984452614,-0.583656508  
 C,0,-0.6978162791,-1.8418699274,-0.9822223973  
 C,0,-2.0163405052,-1.7616223385,-0.771543985  
 H,0,2.1633275491,5.1011169536,-0.0804731897  
 H,0,-0.3270088714,5.1209640608,-0.2028788274  
 H,0,-2.6902499437,-2.5871060023,-0.9785751072  
 O,0,-1.8399678519,0.6326622148,-0.7390211518  
 H,0,-0.26364416,-2.753020196,-1.3771035619  
 C,0,-2.601143132,-0.4762958161,-0.2226264174  
 C,0,-4.0203370467,-0.2967838576,-0.7547928563  
 C,0,-5.0916401724,-0.9048476069,-0.0951237302  
 C,0,-4.254556019,0.4021462416,-1.9399768021  
 C,0,-6.3811960213,-0.8148194461,-0.6135643866  
 H,0,-4.9178550325,-1.4400068013,0.8349284441  
 C,0,-5.5478326151,0.4995809514,-2.4519500765  
 H,0,-3.4225553007,0.8704699269,-2.4542103149  
 C,0,-6.6138778566,-0.1091128391,-1.7930659119  
 H,0,-7.2053203274,-1.2892959063,-0.0898622017  
 H,0,-5.7206908244,1.0515557459,-3.3708220256  
 H,0,-7.6196595657,-0.0319208657,-2.1941546857  
 C,0,-2.561779352,-0.3958679182,1.3087673591  
 C,0,-2.9932142665,0.7914490237,1.9109856273  
 C,0,-2.1085019422,-1.4396185409,2.1115672663  
 C,0,-2.9711399353,0.9310024593,3.2932822913  
 H,0,-3.3460758034,1.6055449113,1.282619473  
 C,0,-2.0939212036,-1.3040831407,3.5022847256  
 H,0,-1.7571456558,-2.360080922,1.6557364116  
 C,0,-2.5229237292,-0.1214743028,4.0948566513  
 H,0,-3.3048910006,1.8587235026,3.7477730913  
 H,0,-1.7394413846,-2.1249005137,4.1181733827

|                                              |                             |
|----------------------------------------------|-----------------------------|
| H,0,-2.5073567609,-0.0148931659,5.1750660895 |                             |
| C,0,3.7195167726,0.095999015,-0.1908149644   |                             |
| C,0,3.8226279812,-1.2994147962,-0.3306009295 |                             |
| C,0,4.8710413903,0.8324842907,0.1043295499   |                             |
| C,0,5.0387033109,-1.9537339228,-0.2076236287 |                             |
| C,0,6.0942559971,0.1720050263,0.2319552679   |                             |
| H,0,4.8485554197,1.9032938551,0.2555104838   |                             |
| C,0,6.1863787163,-1.209509357,0.0736965467   |                             |
| H,0,5.101693731,-3.033720459,-0.3209076429   |                             |
| H,0,7.1461753343,-1.7056454872,0.1773283638  |                             |
| C,0,-0.4765590508,2.9973990405,-0.38268138   |                             |
| H,0,-1.5588700396,2.9822585311,-0.4494736943 |                             |
| C,0,2.3140722766,2.9785499688,-0.2122639297  |                             |
| H,0,3.3934397286,3.0033118766,-0.1704794154  |                             |
| C,0,2.4704469275,-1.9232846726,-0.6134413877 |                             |
| C,0,2.5027314716,-2.5979027894,-1.9981340887 |                             |
| H,0,3.2648050999,-3.3839565643,-2.0074644687 |                             |
| H,0,1.5460867369,-3.0591610792,-2.2549712919 |                             |
| H,0,2.7528731594,-1.8678740051,-2.7731245598 |                             |
| C,0,2.1026672693,-2.9331806901,0.4866516738  |                             |
| H,0,2.114176394,-2.4497319426,1.4678760802   |                             |
| H,0,1.1068227794,-3.3553708627,0.3238676902  |                             |
| H,0,2.8231631019,-3.7575795338,0.4987233832  |                             |
| H,0,6.9852176315,0.7475832032,0.463400188    |                             |
| Zero-point correction=                       | 0.500998 (Hartree/Particle) |
| Thermal correction to Energy=                | 0.528206                    |
| Thermal correction to Enthalpy=              | 0.529150                    |
| Thermal correction to Gibbs Free Energy=     | 0.442468                    |
| Sum of electronic and zero-point Energies=   | -1385.511318                |
| Sum of electronic and thermal Energies=      | -1385.484110                |
| Sum of electronic and thermal Enthalpies=    | -1385.483166                |
| Sum of electronic and thermal Free Energies= | -1385.569848                |

### 6NP-a-CF

C,0,2.2103358854,2.8456311076,0.5961686808  
 C,0,1.639701847,0.6329834956,-0.1870995369  
 C,0,0.266925975,1.0276233696,-0.1885128328  
 C,0,0.8543756814,3.2275695546,0.5935667768  
 C,0,1.9991615398,-0.6962101632,-0.5911572343  
 C,0,-0.7153855261,0.0848024401,-0.5893520006  
 C,0,-0.3663473086,-1.1890260994,-0.9848318271  
 C,0,0.9976649768,-1.5594401925,-0.9789422504  
 C,0,-1.4395804303,-2.0666120609,-1.4435040731  
 C,0,-2.7113932958,-1.7449856724,-1.1845230856



H,0,2.9479927181,3.5784851158,0.9099441097  
H,0,0.5802970141,4.2315210866,0.9020688762  
H,0,-3.5475987811,-2.3538293413,-1.5141117141  
O,0,-2.0091940247,0.5057619814,-0.6430776797  
H,0,-1.1841551415,-2.9621952316,-2.0041729252  
C,0,-3.019692884,-0.4909304305,-0.3870882534  
C,0,-4.3337791582,0.1085056934,-0.8834876205  
C,0,-5.5476913641,-0.3764108217,-0.3892495753  
C,0,-4.3420597591,1.0847186431,-1.8803347536  
C,0,-6.7549940054,0.1091735577,-0.8858203742  
H,0,-5.5477879471,-1.1268185475,0.3976384519  
C,0,-5.5520143233,1.5771076185,-2.3687838986  
H,0,-3.4001345519,1.4582943399,-2.2663119803  
C,0,-6.7606890472,1.0905148796,-1.8759573336  
H,0,-7.6912444421,-0.2735269793,-0.4913659319  
H,0,-5.5470970664,2.3423962696,-3.1391710067  
H,0,-7.701139612,1.4746622607,-2.2586005288  
C,0,-3.0529146074,-0.7294301279,1.1280326605  
C,0,-3.260775017,0.3801823593,1.9552979614  
C,0,-2.8717372452,-1.9837873746,1.7048924774  
C,0,-3.2856798696,0.2363672261,3.33670006  
H,0,-3.4024515348,1.3580701765,1.5017136182  
C,0,-2.9049925392,-2.1315270662,3.094184544  
H,0,-2.6943307302,-2.8488257658,1.0735818692  
C,0,-3.1101901391,-1.0252375066,3.9109969712  
H,0,-3.4444030187,1.1050846007,3.9683092129  
H,0,-2.7623693881,-3.1140766605,3.5334360055  
H,0,-3.1317798177,-1.1402844196,4.990265624  
C,0,3.4255182339,-1.0953349799,-0.5823191418  
C,0,3.8176556912,-2.3898333617,-0.9694044566  
C,0,4.4176788676,-0.1843164211,-0.1850516015  
C,0,5.1457399023,-2.7832306477,-0.9704865802  
C,0,5.7571995577,-0.5995358687,-0.191235683  
C,0,6.1307983657,-1.8783279895,-0.5771967053  
H,0,5.4112191405,-3.7906152698,-1.2752240207  
H,0,7.1772896942,-2.1663260237,-0.5701617523  
C,0,-0.110610924,2.3315223782,0.2090277443  
H,0,-1.1623141303,2.5946280833,0.2045474837  
C,0,2.6207971106,1.5795267478,0.2207692843  
C,0,4.1103009026,1.2444122636,0.2600824969  
H,0,1.2280296645,-2.5687072416,-1.3021303608  
H,0,3.0725447167,-3.1132868129,-1.2780520271  
C,0,4.8581139338,2.2225397821,-0.6738445698  
H,0,5.9362792496,2.0432209426,-0.649397467

|                                              |                             |
|----------------------------------------------|-----------------------------|
| H,0,4.5123512299,2.1032569618,-1.7047395772  |                             |
| H,0,4.6835829473,3.2584297636,-0.3706498998  |                             |
| C,0,4.6133916112,1.4241663465,1.7104970604   |                             |
| H,0,4.0852203315,0.742293027,2.3833486768    |                             |
| H,0,5.6846970456,1.2180128713,1.7827045178   |                             |
| H,0,4.4438208822,2.4476569883,2.0559375678   |                             |
| H,0,6.5322661739,0.0964712956,0.1156075881   |                             |
| Zero-point correction=                       | 0.501747 (Hartree/Particle) |
| Thermal correction to Energy=                | 0.528661                    |
| Thermal correction to Enthalpy=              | 0.529605                    |
| Thermal correction to Gibbs Free Energy=     | 0.442763                    |
| Sum of electronic and zero-point Energies=   | -1385.514499                |
| Sum of electronic and thermal Energies=      | -1385.487585                |
| Sum of electronic and thermal Enthalpies=    | -1385.486641                |
| Sum of electronic and thermal Free Energies= | -1385.573483                |

### 5/6NP-a-CF

C,0,-1.9861915944,-3.4173025651,-0.2116688312  
 C,0,-1.4526586302,-1.1043594707,-0.3525544433  
 C,0,-0.069927434,-1.3753385494,-0.4808307548  
 C,0,-0.6055078885,-3.7158513162,-0.3460090413  
 C,0,-1.842512901,0.23709562,-0.3533907599  
 C,0,0.8073410339,-0.2510753875,-0.5959020424  
 C,0,0.3743551642,1.0774902779,-0.6111139451  
 C,0,-1.0202260708,1.3229880057,-0.4778747695  
 C,0,1.3996241539,2.098804195,-0.8192220134  
 C,0,2.692124104,1.7930706294,-0.6593973481  
 H,0,-2.682105891,-4.2458683521,-0.1081869986  
 H,0,-0.2969300082,-4.7569238373,-0.3406012913  
 H,0,3.4866053473,2.5148204508,-0.8216575292  
 O,0,2.129072544,-0.5453246613,-0.7707612972  
 H,0,1.0988954718,3.0964169418,-1.1244914323  
 C,0,3.0741267863,0.3924083321,-0.2225960018  
 C,0,4.4274534027,0.0262099853,-0.8280747787  
 C,0,5.6056795447,0.4194829159,-0.1883712156  
 C,0,4.5024630586,-0.6312560923,-2.056722124  
 C,0,6.8440079023,0.1595981748,-0.7708454172  
 H,0,5.5540740221,0.9198405395,0.7754112276  
 C,0,5.7433807732,-0.8995499156,-2.6332110235  
 H,0,3.5871925205,-0.9333605458,-2.5534177964  
 C,0,6.9164785251,-0.5035222312,-1.9949999485  
 H,0,7.7524826012,0.4679376682,-0.2625689817  
 H,0,5.7909732088,-1.4179751644,-3.5860505844  
 H,0,7.8816124792,-0.7108289204,-2.4467731307

C,0,3.0800275289,0.2173209063,1.3016190527  
 C,0,3.3112196913,-1.065400824,1.8111448888  
 C,0,2.8679012944,1.2723845643,2.1856148461  
 C,0,3.328935496,-1.2873434631,3.1827644895  
 H,0,3.4772790418,-1.8863379184,1.1179066652  
 C,0,2.8933461763,1.0523776116,3.5652007915  
 H,0,2.6750075477,2.2692863275,1.8014063618  
 C,0,3.1226818945,-0.2246426753,4.0656271685  
 H,0,3.5047042231,-2.2874880795,3.5668920299  
 H,0,2.7263661199,1.882225976,4.2451326986  
 H,0,3.1387451952,-0.396344333,5.137442099  
 C,0,-3.2062308966,0.6242399185,-0.1898849487  
 C,0,-3.2893828895,2.0154932534,-0.1988442994  
 C,0,-4.2503639814,-0.2685936599,-0.0397241244  
 C,0,-4.5459471852,2.5831528019,-0.0468433785  
 C,0,-5.5117293405,0.3234793767,0.112651689  
 C,0,-5.6446446562,1.7182319277,0.1084608266  
 H,0,-4.6998855342,3.6595160268,-0.0429862852  
 H,0,-6.6350198429,2.1464929893,0.2304937863  
 C,0,0.3464910652,-2.7285731317,-0.4748676328  
 H,0,1.3999593106,-2.9694339723,-0.5692083526  
 C,0,-2.4439252543,-2.1140819635,-0.2065997527  
 C,0,-1.8778767514,2.6028489726,-0.3969454643  
 C,0,-1.8314834665,3.4228439533,-1.6965417482  
 H,0,-2.54496613,4.2517295879,-1.6404693627  
 H,0,-0.83709609,3.8473104668,-1.8642766866  
 H,0,-2.0931671235,2.8002827981,-2.556540579  
 C,0,-1.4689572142,3.4683393147,0.8046218895  
 H,0,-1.5211402069,2.890765037,1.7317954342  
 H,0,-0.4447608993,3.837487748,0.684887879  
 H,0,-2.1358239615,4.3324679429,0.89443615  
 C,0,-3.9535880411,-1.7790219524,-0.0555901623  
 C,0,-4.7158105914,-2.4107362985,-1.2387297958  
 H,0,-5.7882985033,-2.2089908515,-1.1525824317  
 H,0,-4.362086607,-1.9991724932,-2.1883068257  
 H,0,-4.5727691707,-3.4956169134,-1.2573344497  
 C,0,-4.4640611657,-2.3900119105,1.2650320848  
 H,0,-3.9357816394,-1.9567812737,2.1190228744  
 H,0,-5.5345017543,-2.1970581797,1.3867373073  
 H,0,-4.3118382658,-3.4734148283,1.2775408854  
 H,0,-6.4042922379,-0.2856242666,0.2361574648

Zero-point correction=

Thermal correction to Energy=

Thermal correction to Enthalpy=

0.563645 (Hartree/Particle)

0.592885

0.593829

|                                              |              |
|----------------------------------------------|--------------|
| Thermal correction to Gibbs Free Energy=     | 0.504759     |
| Sum of electronic and zero-point Energies=   | -1502.144012 |
| Sum of electronic and thermal Energies=      | -1502.114772 |
| Sum of electronic and thermal Enthalpies=    | -1502.113828 |
| Sum of electronic and thermal Free Energies= | -1502.202898 |

### 5NP-b-CF

C,0,-2.3763484845,-0.1755776332,4.25555556947  
 C,0,-2.4566266458,-0.4668933802,1.8372160551  
 C,0,-1.0329757123,-0.5580435299,1.8353741935  
 C,0,-0.9655821236,-0.2461944632,4.2381130625  
 C,0,-3.1420902063,-0.5820708673,0.5874123992  
 C,0,-0.3535980544,-0.778021675,0.6051637605  
 C,0,-1.0268650835,-0.9709602282,-0.5901858499  
 C,0,-2.4414103265,-0.8623264932,-0.5766605115  
 C,0,-0.2013904684,-1.3195606707,-1.7492438242  
 C,0,1.1177588569,-1.1009917401,-1.7180582613  
 H,0,-2.8970622318,-0.0418314818,5.1987932885  
 H,0,-0.4067556717,-0.1591505112,5.164490246  
 H,0,1.771677483,-1.3805579219,-2.5381763018  
 O,0,1.0029069883,-0.8733893628,0.6695309368  
 H,0,-0.6559768619,-1.7884572231,-2.6141729057  
 C,0,1.7309434468,-0.4369745053,-0.49949443  
 C,0,3.1541281293,-0.9439183098,-0.2874022108  
 C,0,4.2730790323,-0.1651066778,-0.5555036227  
 C,0,3.3455469423,-2.268276697,0.1349666955  
 C,0,5.566707269,-0.6787779174,-0.4099861115  
 H,0,4.1531467991,0.8641493857,-0.8797988725  
 C,0,4.6181880598,-2.7888169917,0.2899983911  
 H,0,2.4794694872,-2.8857256053,0.3533572562  
 C,0,5.7395633143,-1.993990289,0.0165908077  
 H,0,6.4150291716,-0.0406396704,-0.6265848771  
 H,0,4.7763111868,-3.8088657238,0.6244053839  
 C,0,1.657389021,1.0884142734,-0.5738400825  
 C,0,1.7554022921,1.8331577267,0.5992174778  
 C,0,1.5408865123,1.7708583715,-1.7879582267  
 C,0,1.7347027084,3.2272808197,0.5796822514  
 H,0,1.8421257823,1.3150100835,1.5502550719  
 C,0,1.5302940809,3.1586013131,-1.8282635055  
 H,0,1.4510856172,1.2139601725,-2.7160651287  
 C,0,1.6242474303,3.894410986,-0.6432120168  
 H,0,1.8007776755,3.7722332094,1.5137467758  
 H,0,1.4394796126,3.6963123851,-2.766217422  
 C,0,-4.5763752649,-0.4415119239,0.2495992418

|                                               |                             |
|-----------------------------------------------|-----------------------------|
| C,0,-4.7160532639,-0.6791835791,-1.1291973698 |                             |
| C,0,-5.7103931329,-0.1067065599,0.9961784358  |                             |
| C,0,-5.9515957818,-0.6169537036,-1.7549768963 |                             |
| C,0,-6.9532447606,-0.0399737505,0.3641986354  |                             |
| H,0,-5.6593547028,0.1221158797,2.0522370021   |                             |
| C,0,-7.0818071543,-0.2973290048,-0.9994670141 |                             |
| H,0,-6.0429791853,-0.8064347179,-2.8221671788 |                             |
| H,0,-8.0563854091,-0.2396298301,-1.473925338  |                             |
| C,0,-0.3073679526,-0.4368192981,3.0482508971  |                             |
| H,0,0.7741487119,-0.512176383,3.0130538312    |                             |
| C,0,-3.0983162043,-0.2820486426,3.0898024189  |                             |
| H,0,-4.1771804656,-0.2487204904,3.1388938368  |                             |
| C,0,-3.3776729968,-0.9882015487,-1.7703357334 |                             |
| C,0,-3.4086094519,-2.4179691867,-2.3435638664 |                             |
| H,0,-4.1938043755,-2.4942516772,-3.1026450987 |                             |
| H,0,-2.4624110744,-2.6933676458,-2.8154687314 |                             |
| H,0,-3.6238943678,-3.1425515205,-1.5531716535 |                             |
| C,0,-3.0546584925,0.0410077246,-2.8664018979  |                             |
| H,0,-3.0666587299,1.0541891498,-2.4545562109  |                             |
| H,0,-2.0689630372,-0.1385811354,-3.3048598358 |                             |
| H,0,-3.7990578803,-0.0163217311,-3.6673383408 |                             |
| O,0,1.5953411596,5.2469654086,-0.7796318498   |                             |
| O,0,6.9470351481,-2.5920824507,0.1989897333   |                             |
| C,0,1.6980010794,6.0287699885,0.3926467951    |                             |
| H,0,1.6609115556,7.0674491809,0.0661438271    |                             |
| H,0,0.8633262544,5.8303517923,1.0753041462    |                             |
| H,0,2.6463141407,5.8425685022,0.9110333383    |                             |
| C,0,8.1046235892,-1.8181586932,-0.0364147161  |                             |
| H,0,8.137551975,-0.9444172579,0.6254173953    |                             |
| H,0,8.9515043927,-2.4689342716,0.1786613025   |                             |
| H,0,8.1547867897,-1.4866855455,-1.0805315826  |                             |
| H,0,-7.8305851402,0.2222967639,0.9474258906   |                             |
| Zero-point correction=                        | 0.566996 (Hartree/Particle) |
| Thermal correction to Energy=                 | 0.599197                    |
| Thermal correction to Enthalpy=               | 0.600142                    |
| Thermal correction to Gibbs Free Energy=      | 0.502433                    |
| Sum of electronic and zero-point Energies=    | -1614.411271                |
| Sum of electronic and thermal Energies=       | -1614.379069                |
| Sum of electronic and thermal Enthalpies=     | -1614.378125                |
| Sum of electronic and thermal Free Energies=  | -1614.475834                |

#### 5NP-c-CF

C,0,-2.1992534036,-0.1109452233,4.1707738146  
C,0,-2.3267708686,-0.4137921908,1.756076095

C,0,-1.03526054,-1.0179064163,1.7991680449  
C,0,-0.9088569955,-0.6851291588,4.1960643109  
C,0,-2.9732726452,-0.2901934187,0.4860330059  
C,0,-0.4562067129,-1.5010062244,0.5939714346  
C,0,-1.1119304831,-1.436952498,-0.6243556346  
C,0,-2.3857827482,-0.8129735259,-0.6567983905  
C,0,-0.4292616001,-2.0564117911,-1.7629092774  
C,0,0.8771424666,-2.3332814147,-1.6862082238  
H,0,-2.6558809909,0.2289122613,5.0952665407  
H,0,-0.3739612156,-0.7754332613,5.1360579158  
H,0,1.4193346258,-2.8082083668,-2.4977835412  
O,0,0.7585511713,-2.1065001994,0.7024128954  
H,0,-0.9877624005,-2.3109428933,-2.6560556173  
C,0,1.6399044378,-1.9749011825,-0.4282535891  
C,0,2.7673847253,-2.9795570736,-0.2089654204  
C,0,3.924046456,-2.8833337464,-0.9885986701  
C,0,2.6495724762,-4.0172712496,0.7147709665  
C,0,4.9489595135,-3.8139872743,-0.8474021416  
H,0,4.0280628294,-2.066478407,-1.6992368979  
C,0,3.6830842516,-4.9434339399,0.8623777642  
H,0,1.7514358059,-4.0965979967,1.3165977246  
C,0,4.832283927,-4.8471925362,0.0826161908  
H,0,5.8430728179,-3.7268138296,-1.4568218678  
H,0,3.5847450285,-5.7433634509,1.5898521165  
H,0,5.6342509979,-5.5693745293,0.199092135  
C,0,2.1774007022,-0.5382481456,-0.4293849931  
C,0,2.9037515801,-0.109162674,0.6872217195  
C,0,1.9480599738,0.3617736381,-1.4668361159  
C,0,3.3927520276,1.1870164547,0.7597063091  
H,0,3.0937686766,-0.8086748424,1.4977624142  
C,0,2.4443419322,1.6641670713,-1.3965091614  
H,0,1.3657323856,0.0550619808,-2.3303082229  
C,0,3.1730037002,2.0967543557,-0.2860904095  
H,0,3.976205464,1.4952527298,1.6226660305  
H,0,2.2338593807,2.3611191042,-2.2028342846  
C,0,-4.2469785671,0.3601645889,0.1030050021  
C,0,-4.4127000416,0.1926304068,-1.2831720331  
C,0,-5.2122883084,1.0771125025,0.8167582285  
C,0,-5.517092632,0.7014254505,-1.949209051  
C,0,-6.322324759,1.5919165018,0.1446017443  
H,0,-5.1256069186,1.263486221,1.8786888486  
C,0,-6.4826185381,1.4061428265,-1.2272869604  
H,0,-5.6303012939,0.5609791983,-3.0217886185  
H,0,-7.3516991628,1.8135714078,-1.7340175217

|                                               |                             |
|-----------------------------------------------|-----------------------------|
| C,0,-0.3390483223,-1.1320659626,3.02965992    |                             |
| H,0,0.6480752274,-1.5812486865,3.023875641    |                             |
| C,0,-2.8847574949,0.0226555725,2.9859926546   |                             |
| H,0,-3.8755961319,0.4527111953,3.0025461808   |                             |
| C,0,-3.2566537165,-0.5819445479,-1.8841450738 |                             |
| C,0,-3.7852833672,-1.8956682539,-2.4905624806 |                             |
| H,0,-4.5121895713,-1.6727156781,-3.2784252224 |                             |
| H,0,-2.9870063913,-2.4948354113,-2.9350840011 |                             |
| H,0,-4.2830185534,-2.4969579314,-1.7246368714 |                             |
| C,0,-2.5340895395,0.2659236619,-2.9448700105  |                             |
| H,0,-2.1774703695,1.2028427259,-2.5071034316  |                             |
| H,0,-1.6754484919,-0.2674090583,-3.3633393171 |                             |
| H,0,-3.2176090982,0.5059839723,-3.7658411607  |                             |
| C,0,3.7029980583,3.4814514823,-0.2101780145   |                             |
| C,0,4.2545615541,4.0993733645,-1.3395262479   |                             |
| C,0,3.66556781,4.1967384199,0.993435382       |                             |
| C,0,4.7556405619,5.3964772998,-1.2680315029   |                             |
| H,0,4.3128427424,3.5475647415,-2.273677562    |                             |
| C,0,4.1674881604,5.493363239,1.0661760957     |                             |
| H,0,3.2177018581,3.740248845,1.8717640662     |                             |
| C,0,4.714742596,6.0981248873,-0.0643145732    |                             |
| H,0,5.186830266,5.8565414068,-2.1518933585    |                             |
| H,0,4.1233323959,6.0356852374,2.0057487482    |                             |
| H,0,5.1056170985,7.109194295,-0.0073121912    |                             |
| H,0,-7.0677436792,2.1488020147,0.7039723625   |                             |
| Zero-point correction=                        | 0.582655 (Hartree/Particle) |
| Thermal correction to Energy=                 | 0.614567                    |
| Thermal correction to Enthalpy=               | 0.615511                    |
| Thermal correction to Gibbs Free Energy=      | 0.516789                    |
| Sum of electronic and zero-point Energies=    | -1616.402603                |
| Sum of electronic and thermal Energies=       | -1616.370691                |
| Sum of electronic and thermal Enthalpies=     | -1616.369747                |
| Sum of electronic and thermal Free Energies=  | -1616.468468                |

#### NP-a -TC

C,0,4.4861783627,-2.9000608064,0.2793724026  
 C,0,2.8258238664,-1.1312298756,0.1395314183  
 C,0,1.8204322937,-2.1000627311,0.3442728799  
 C,0,3.4851742622,-3.8481571631,0.5074095827  
 C,0,2.4503950994,0.2772244635,-0.0561057108  
 C,0,0.3750360069,-1.7383500559,0.3414868441  
 C,0,0.0459198743,-0.3180120598,0.0455145831  
 C,0,1.1426643019,0.6195203384,-0.1121694637  
 C,0,-1.2362149736,0.1467152344,-0.0716470965

C,0,-2.4637259004,-0.6025544239,-0.0215180395  
H,0,5.5266522809,-3.2078670436,0.2392687709  
H,0,3.7424492242,-4.8922832963,0.6525408895  
H,0,-2.3836888103,-1.682208425,0.0059301244  
O,0,-0.4798968546,-2.5878635942,0.5649762016  
H,0,-1.3348407054,1.2134698075,-0.2719644774  
C,0,-3.7003676329,-0.0294454394,-0.0375798916  
C,0,-4.9103970017,-0.8744069774,-0.1728473737  
C,0,-6.1135872438,-0.5043994355,0.4482030282  
C,0,-4.8790974264,-2.0650868716,-0.9152697973  
C,0,-7.2423292728,-1.3124229915,0.3500453813  
H,0,-6.1554778992,0.4149334795,1.0248117998  
C,0,-6.0100331922,-2.8684126487,-1.0182567795  
H,0,-3.9672467153,-2.3485916927,-1.4316066915  
C,0,-7.1950372032,-2.4971023145,-0.3834150213  
H,0,-8.1601427215,-1.0167004361,0.8484684454  
H,0,-5.9684762663,-3.7818843583,-1.6030519077  
H,0,-8.0773340147,-3.1240258921,-0.4651234909  
C,0,-3.9042715641,1.4352636763,0.1020589196  
C,0,-4.7306011214,2.1230870573,-0.7987420686  
C,0,-3.2962939101,2.1519562284,1.1411836893  
C,0,-4.9161951833,3.49683882,-0.6817303293  
H,0,-5.2191776446,1.5716482659,-1.5973753739  
C,0,-3.4935247595,3.5259362607,1.2663243698  
H,0,-2.6830860513,1.6191684553,1.8626835723  
C,0,-4.298515382,4.2022312455,0.3521167658  
H,0,-5.5466811886,4.0181111396,-1.3951706182  
H,0,-3.021872847,4.0653679092,2.0816380809  
H,0,-4.4510238875,5.2726243858,0.4478243556  
C,0,3.4899374914,1.3316175172,-0.1960470172  
C,0,3.4966963049,2.1714662683,-1.3153264176  
C,0,4.4359555807,3.1950217462,-1.4323957301  
C,0,5.3863140143,2.5607859009,0.6897792561  
C,0,5.3838674948,3.3920540452,-0.430944005  
H,0,4.4291952938,3.8343602026,-2.3097838585  
H,0,6.1167479016,4.1875658156,-0.5213548521  
C,0,2.157845351,-3.4436631013,0.5332025852  
H,0,1.3512368493,-4.1520103759,0.6923939593  
H,0,0.8795085317,1.6652884055,-0.2598435425  
H,0,2.765251889,2.0082188011,-2.1018769346  
H,0,6.1164844893,2.7131030916,1.478652988  
C,0,4.4489963315,1.5382533868,0.8052584379  
H,0,4.444822449,0.9005764187,1.6853914982  
C,0,4.1625017072,-1.5613066535,0.096813423



|                                              |                             |
|----------------------------------------------|-----------------------------|
| H,0,4.9507456813,-0.8409008232,-0.0928167442 |                             |
| Zero-point correction=                       | 0.437192 (Hartree/Particle) |
| Thermal correction to Energy=                | 0.462132                    |
| Thermal correction to Enthalpy=              | 0.463076                    |
| Thermal correction to Gibbs Free Energy=     | 0.379356                    |
| Sum of electronic and zero-point Energies=   | -1268.859807                |
| Sum of electronic and thermal Energies=      | -1268.834868                |
| Sum of electronic and thermal Enthalpies=    | -1268.833923                |
| Sum of electronic and thermal Free Energies= | -1268.917643                |

### 5NP-a- TC

C,0,-4.35643006,3.918968479,0.7532647621  
 C,0,-3.0000312299,1.9666272547,0.24802938  
 C,0,-1.8712354032,2.808407107,0.1933949125  
 C,0,-3.2383446586,4.7490521425,0.6535097616  
 C,0,-2.8096123339,0.533944009,0.021443345  
 C,0,-0.5024258348,2.2610824443,-0.0220057608  
 C,0,-0.3442379472,0.7739989124,-0.0219367389  
 C,0,-1.561972642,-0.0232051044,-0.0476460661  
 C,0,0.8939593607,0.1866667491,-0.0216076964  
 C,0,2.1955472593,0.8024475697,-0.0662280312  
 H,0,-5.327229073,4.3416905916,0.9942464728  
 H,0,-3.3346426867,5.8194014799,0.8038956083  
 H,0,2.2439687749,1.875998808,-0.1861865542  
 O,0,0.444215468,3.0254567293,-0.1628782377  
 H,0,0.9097510037,-0.8957058298,-0.007268838  
 C,0,3.3543312219,0.0863875913,-0.0062762918  
 C,0,4.6605335092,0.7514637425,-0.2220649625  
 C,0,5.817479415,0.2725531213,0.4121214579  
 C,0,4.7714118929,1.8763220118,-1.0549344205  
 C,0,7.0403793117,0.9140230063,0.2404351228  
 H,0,5.7516410337,-0.5993819347,1.0561579526  
 C,0,5.9953649237,2.5129221037,-1.2297433696  
 H,0,3.895783524,2.238621532,-1.5846980602  
 C,0,7.1341604844,2.0368261473,-0.580259007  
 H,0,7.9216866453,0.5366205383,0.7497825849  
 H,0,6.0615075448,3.3777887432,-1.882348559  
 H,0,8.0896415245,2.5330518527,-0.7186890924  
 C,0,3.3761628574,-1.3724519467,0.2852969076  
 C,0,4.0218303278,-2.2577848451,-0.5886464854  
 C,0,2.7698014318,-1.8849134393,1.438663264  
 C,0,4.0310258765,-3.6252514229,-0.3311079074  
 H,0,4.5087353244,-1.8643835549,-1.4770066691  
 C,0,2.7905840675,-3.2532914789,1.7037411522

H,0,2.29152804,-1.1987957093,2.1334576267  
 C,0,3.4150647975,-4.1269190361,0.8162222816  
 H,0,4.5225379185,-4.3009318422,-1.0242271059  
 H,0,2.3203833268,-3.634503403,2.6051874643  
 H,0,3.4288914721,-5.1930418393,1.0198427408  
 C,0,-3.8275581091,-0.5205649736,-0.151601996  
 C,0,-3.1496914919,-1.7461155252,-0.2576839434  
 C,0,-5.22095947,-0.4993027234,-0.2757472645  
 C,0,-3.8341363076,-2.9395821727,-0.4282602949  
 C,0,-5.90814438,-1.7006336406,-0.4544647427  
 H,0,-5.7857767918,0.4236823647,-0.2694360436  
 C,0,-5.2274891569,-2.9160023449,-0.5185152145  
 H,0,-3.2972495919,-3.8825001735,-0.5018383707  
 H,0,-5.7790665301,-3.8408717244,-0.6543542663  
 C,0,-1.9984567265,4.1867885077,0.3823545994  
 H,0,-1.1005254922,4.7932702591,0.3236264632  
 C,0,-4.239728209,2.5480314566,0.5548975654  
 H,0,-5.1156694269,1.9261193371,0.6744001638  
 C,0,-1.6498760503,-1.5437312499,-0.1867719208  
 C,0,-1.104713293,-2.2822581994,1.0525106296  
 H,0,-1.3390260476,-3.3490055226,0.9746319205  
 H,0,-0.0205323894,-2.1897109823,1.151928531  
 H,0,-1.5724591983,-1.8937795378,1.9619959822  
 C,0,-1.0071227118,-2.0743457503,-1.48212971  
 H,0,-1.410262494,-1.5461749772,-2.3510684943  
 H,0,0.0798105052,-1.9605744464,-1.4834232515  
 H,0,-1.2302276776,-3.1399196109,-1.5950723479  
 H,0,-6.9893102481,-1.6838202605,-0.5516719376  
 Zero-point correction= 0.500287 (Hartree/Particle)  
 Thermal correction to Energy= 0.528397  
 Thermal correction to Enthalpy= 0.529341  
 Thermal correction to Gibbs Free Energy= 0.439646  
 Sum of electronic and zero-point Energies= -1385.494317  
 Sum of electronic and thermal Energies= -1385.466207  
 Sum of electronic and thermal Enthalpies= -1385.465262  
 Sum of electronic and thermal Free Energies= -1385.554958

**6NP-a -TC**

C,0,4.1724495712,-2.9775348196,0.2929050649  
 C,0,2.5548743972,-1.1945631635,0.1540094096  
 C,0,1.5330618546,-2.1627109275,0.2929399965  
 C,0,3.1638018329,-3.9257171955,0.4340398355  
 C,0,2.1995559939,0.2215291951,0.0025648112  
 C,0,0.0910393857,-1.7889357276,0.2898140761

C,0,-0.2169061891,-0.3535449388,0.0702618285  
C,0,0.8900923827,0.5705884494,-0.0470938831  
C,0,-1.492599403,0.136238081,-0.0337887953  
C,0,-2.7333729273,-0.5892452412,0.0009908728  
H,0,5.2043358191,-3.3164661291,0.2897913646  
H,0,3.4159214529,-4.9759575517,0.539966971  
H,0,-2.6737218896,-1.6701260432,0.0286112727  
O,0,-0.7739802131,-2.6416560496,0.4535391591  
H,0,-1.5716222237,1.2105202925,-0.1990949645  
C,0,-3.9588561268,0.0086664451,-0.0224536863  
C,0,-5.1876718227,-0.8100358173,-0.1478625739  
C,0,-6.3854872767,-0.3922575388,0.4528780687  
C,0,-5.1820546073,-2.0228001937,-0.8548636572  
C,0,-7.5339486636,-1.1732893455,0.369953594  
H,0,-6.4082061159,0.5437350146,1.003118762  
C,0,-6.332468276,-2.7996145252,-0.9420295228  
H,0,-4.2749537748,-2.3457078971,-1.3564806764  
C,0,-7.5119428745,-2.380283378,-0.3271503307  
H,0,-8.4470947466,-0.8392015104,0.8527750425  
H,0,-6.3104401653,-3.7307688149,-1.4995184923  
H,0,-8.4093120455,-2.987270221,-0.3955214807  
C,0,-4.1329473461,1.4797751771,0.0995512913  
C,0,-4.9177122583,2.1766821566,-0.8301025687  
C,0,-3.5389903154,2.1925970661,1.1489887481  
C,0,-5.0767722339,3.5551667837,-0.7304505344  
H,0,-5.3964069917,1.6286272775,-1.6371942012  
C,0,-3.7095930387,3.571553546,1.2566104983  
H,0,-2.9572694132,1.6529156781,1.8913894371  
C,0,-4.4733915788,4.2567563348,0.3141457008  
H,0,-5.6750729746,4.0832142849,-1.4664426788  
H,0,-3.248760339,4.1078116365,2.0804169321  
H,0,-4.6052402336,5.3311491626,0.3962513709  
C,0,3.2898468696,1.2163217391,-0.1041243354  
C,0,3.0050049753,2.5929638229,-0.1900385139  
C,0,4.6339082788,0.8084097258,-0.1197129447  
C,0,4.0049521853,3.5421384519,-0.3088514069  
C,0,5.6346458022,1.7844497895,-0.246114138  
C,0,5.3389678527,3.1349660634,-0.3437637988  
H,0,3.7468797024,4.5945067337,-0.3722910338  
H,0,6.1379883343,3.8630304852,-0.4410007093  
C,0,1.8388599253,-3.5143290413,0.4362050236  
H,0,1.0200344587,-4.2176546991,0.5444513181  
C,0,3.8969126358,-1.6134201948,0.1550055538  
C,0,5.069962623,-0.6491610366,0.0033613449

|                                              |                             |
|----------------------------------------------|-----------------------------|
| H,0,0.6064925081,1.6081472165,-0.1880593842  |                             |
| H,0,1.9785388009,2.9378617599,-0.1578243235  |                             |
| C,0,5.9798462194,-0.7836950393,1.2463511085  |                             |
| H,0,6.8563330313,-0.1359697793,1.1626664071  |                             |
| H,0,5.431539095,-0.5050467842,2.1508004285   |                             |
| H,0,6.335887609,-1.8107529063,1.3621770584   |                             |
| C,0,5.8639583301,-1.0394553241,-1.2644475026 |                             |
| H,0,5.2318973821,-0.9512671443,-2.1528221711 |                             |
| H,0,6.7343592191,-0.3911297572,-1.3952917397 |                             |
| H,0,6.2219131678,-2.0704718418,-1.1979062905 |                             |
| H,0,6.6764056686,1.4789722879,-0.2663615125  |                             |
| Zero-point correction=                       | 0.500971 (Hartree/Particle) |
| Thermal correction to Energy=                | 0.528719                    |
| Thermal correction to Enthalpy=              | 0.529663                    |
| Thermal correction to Gibbs Free Energy=     | 0.440613                    |
| Sum of electronic and zero-point Energies=   | -1385.498725                |
| Sum of electronic and thermal Energies=      | -1385.470977                |
| Sum of electronic and thermal Enthalpies=    | -1385.470033                |
| Sum of electronic and thermal Free Energies= | -1385.559083                |

#### 5/6NP-a -TC

C,0,4.2325264772,-3.2393553741,0.2869574807  
 C,0,2.5758811633,-1.541678686,0.1271296413  
 C,0,1.5477547831,-2.4862937855,0.2321088071  
 C,0,3.2191303438,-4.1995425799,0.3920135032  
 C,0,2.196392157,-0.1714503925,-0.0150835779  
 C,0,0.1160426114,-2.0334245056,0.2053287021  
 C,0,-0.1907522455,-0.5596205709,0.028249968  
 C,0,0.9466120935,0.3413366051,-0.0688380821  
 C,0,-1.4751554581,-0.0907798121,-0.0441167242  
 C,0,-2.7179352785,-0.8194281708,-0.0290144132  
 H,0,5.2665563495,-3.5743011452,0.3125885286  
 H,0,3.4906184161,-5.2454848395,0.4951760484  
 H,0,-2.6676810193,-1.9000090897,-0.056629187  
 O,0,-0.7718877637,-2.8658020957,0.3296751917  
 H,0,-1.5747011495,0.9840030338,-0.1639487574  
 C,0,-3.9387564209,-0.2136434348,-0.0086912917  
 C,0,-5.1769964761,-1.0149889419,-0.1544507418  
 C,0,-6.3618299575,-0.6156177428,0.4832001177  
 C,0,-5.1939038384,-2.1937922706,-0.9166887723  
 C,0,-7.5185619023,-1.3822975771,0.382930825  
 H,0,-6.3673983038,0.2944932898,1.0757167737  
 C,0,-6.3522235179,-2.9567709611,-1.0202222431  
 H,0,-4.2977835353,-2.5002602771,-1.4474425503

C,0,-7.518333039,-2.5567823532,-0.3680355862  
H,0,-8.4209593162,-1.0630765961,0.8951217104  
H,0,-6.3472448807,-3.8617108316,-1.6197748742  
H,0,-8.4218773524,-3.1529493055,-0.4493296215  
C,0,-4.0962093176,1.2526318157,0.1823978051  
C,0,-4.8747647099,2.003413375,-0.7097308052  
C,0,-3.4850330194,1.9083252934,1.2588252135  
C,0,-5.0098027561,3.378782634,-0.5473230261  
H,0,-5.3673846975,1.4994759815,-1.5369471706  
C,0,-3.6290208474,3.2841987061,1.4280865886  
H,0,-2.9063759127,1.3259858347,1.9714949648  
C,0,-4.3866143562,4.0234652666,0.5222044842  
H,0,-5.6042424484,3.9493974835,-1.2541332249  
H,0,-3.1510553361,3.7758238983,2.2700815096  
H,0,-4.4984223447,5.0954636426,0.6518719092  
C,0,3.1955683643,0.8419111466,-0.127944827  
C,0,2.5694141129,2.0811501898,-0.2589157121  
C,0,4.5587281639,0.6071911367,-0.110127537  
C,0,3.3742739928,3.2026059243,-0.3845005161  
C,0,5.356463864,1.7524102933,-0.2368383638  
C,0,4.7683405644,3.0162340105,-0.3702128108  
H,0,2.9616611029,4.2027247446,-0.4924872  
H,0,5.4147751323,3.8835919948,-0.4658135886  
C,0,1.8752662285,-3.8337371417,0.3682390189  
H,0,1.0822130799,-4.5695646881,0.4537796706  
C,0,3.9412403284,-1.8796180886,0.1523138574  
C,0,1.046680567,1.8755913346,-0.2318517307  
C,0,0.4397868285,2.6253868257,0.9664689148  
H,0,0.6443521659,3.6976519722,0.8777105786  
H,0,-0.645700421,2.4944404462,1.0118805226  
H,0,0.873944349,2.2668098777,1.9043239718  
C,0,0.4332026765,2.3714317455,-1.552581873  
H,0,0.8563504345,1.8275657651,-2.401922831  
H,0,-0.6533132375,2.2445553121,-1.5660069636  
H,0,0.6478160223,3.4371728932,-1.6838582766  
C,0,5.0767758885,-0.8306845557,0.0417854371  
C,0,5.9441093624,-0.9042433399,1.3158041512  
H,0,6.7718648846,-0.1910846263,1.2525193512  
H,0,5.3490877475,-0.6637941069,2.2013420356  
H,0,6.3679655654,-1.9047431929,1.4437384679  
C,0,5.9457872098,-1.1706842162,-1.186748361  
H,0,5.3500481649,-1.1308336707,-2.1030171375  
H,0,6.7698227017,-0.4565086405,-1.2795120302  
H,0,6.3761524712,-2.1725505365,-1.0962485381

|                                              |                             |
|----------------------------------------------|-----------------------------|
| H,0,6.4414044109,1.6797303205,-0.2341826936  |                             |
| Zero-point correction=                       | 0.563187 (Hartree/Particle) |
| Thermal correction to Energy=                | 0.594317                    |
| Thermal correction to Enthalpy=              | 0.595261                    |
| Thermal correction to Gibbs Free Energy=     | 0.499601                    |
| Sum of electronic and zero-point Energies=   | -1502.131257                |
| Sum of electronic and thermal Energies=      | -1502.100128                |
| Sum of electronic and thermal Enthalpies=    | -1502.099184                |
| Sum of electronic and thermal Free Energies= | -1502.194844                |

### 5NP-b -TC

C,0,5.5317046455,-3.8665885501,0.6174883419  
 C,0,4.0932389166,-1.9560056793,0.1795855924  
 C,0,2.9899544406,-2.833720329,0.1684345122  
 C,0,4.4371496693,-4.732126668,0.5591466437  
 C,0,3.8494020855,-0.5309515382,-0.0360598768  
 C,0,1.5957056168,-2.3303516799,0.0179269404  
 C,0,1.3929874322,-0.8517594329,0.0055324452  
 C,0,2.5818584909,-0.0159590973,-0.0640856763  
 C,0,0.1344577435,-0.3046748962,0.0410271506  
 C,0,-1.1456736413,-0.9576129927,0.0163849222  
 H,0,6.5247276244,-4.2586514232,0.815476206  
 H,0,4.5735642762,-5.7995710842,0.6982368964  
 H,0,-1.1666040285,-2.0236308367,-0.1625010733  
 O,0,0.6659021441,-3.1258204874,-0.0577610614  
 H,0,0.0842486261,0.7769544674,0.0629814567  
 C,0,-2.3251243874,-0.2822346524,0.1630200051  
 C,0,-3.6128194345,-0.9651360966,-0.0765716452  
 C,0,-4.7732337414,-0.5748436297,0.6018958447  
 C,0,-3.7154133615,-2.0380683305,-0.9838730018  
 C,0,-5.9892539942,-1.2295414532,0.4133055772  
 H,0,-4.7257325548,0.248006824,1.3089932701  
 C,0,-4.9152717562,-2.6936305041,-1.1869357104  
 H,0,-2.8424460638,-2.3435877832,-1.5520470882  
 C,0,-6.0622460984,-2.2963105777,-0.4854153118  
 H,0,-6.8594662648,-0.902612105,0.9693991144  
 H,0,-4.9991850249,-3.5130254592,-1.8927596129  
 C,0,-2.3762674542,1.1397803041,0.5828096172  
 C,0,-3.1312761557,2.0783707151,-0.1442807245  
 C,0,-1.6902673858,1.5862805626,1.713987658  
 C,0,-3.1648983252,3.4106689708,0.2272491985  
 H,0,-3.6845965598,1.7501467676,-1.0198636152  
 C,0,-1.7254919193,2.9242765985,2.1121700152  
 H,0,-1.1264699474,0.8704003758,2.3067006874

C,0,-2.4594223594,3.8429271945,1.3598656943  
 H,0,-1.1844871405,3.2275979879,3.0005339533  
 C,0,4.8255484118,0.5552307884,-0.2481864671  
 C,0,4.1049172989,1.7577220969,-0.3392859723  
 C,0,6.2141693496,0.579910058,-0.417137123  
 C,0,4.7432720835,2.9716275212,-0.5410502875  
 C,0,6.8551316686,1.8019840772,-0.6264847445  
 H,0,6.8097936275,-0.3232522197,-0.4221338988  
 C,0,6.1332363813,2.9937348973,-0.6771985479  
 H,0,4.1729180885,3.8953489465,-0.6052846813  
 H,0,6.64933126,3.934865013,-0.8382034138  
 C,0,3.169928938,-4.2084534616,0.3442794041  
 H,0,2.2898077512,-4.8426507235,0.3196377591  
 C,0,5.3629493174,-2.4997197815,0.4322102285  
 H,0,6.2233983447,-1.8515699032,0.5196326626  
 C,0,2.6153412263,1.5057817116,-0.2198880844  
 C,0,2.0820652665,2.2424688078,1.0256966058  
 H,0,2.284614603,3.3144155755,0.9302631491  
 H,0,1.0039766757,2.1214116813,1.1551770229  
 H,0,2.5848922198,1.8773476231,1.926101014  
 C,0,1.9178068893,1.9974429651,-1.5024664036  
 H,0,2.3181473384,1.4756456084,-2.3763552615  
 H,0,0.8369586128,1.8400028932,-1.4730322419  
 H,0,2.0961158661,3.0695859201,-1.631997556  
 O,0,-7.1914606969,-2.9981421739,-0.7524375192  
 C,0,-8.3741900827,-2.6318561429,-0.0703990951  
 H,0,-9.14817426,-3.3110829904,-0.4250405072  
 H,0,-8.2560312993,-2.745433066,1.0134355551  
 H,0,-8.659444667,-1.5989557179,-0.3016442899  
 H,0,7.9325160791,1.8197122793,-0.7585328984  
 H,0,-3.729756645,4.1431967261,-0.3394516788  
 O,0,-2.5567796724,5.1652975837,1.6470810235  
 C,0,-1.8489463434,5.6500414326,2.7709138628  
 H,0,-2.0482497265,6.7198992409,2.8131563765  
 H,0,-2.2009189505,5.175805207,3.6943974644  
 H,0,-0.771191007,5.481916695,2.6608149685

|                                              |                             |
|----------------------------------------------|-----------------------------|
| Zero-point correction=                       | 0.566526 (Hartree/Particle) |
| Thermal correction to Energy=                | 0.599703                    |
| Thermal correction to Enthalpy=              | 0.600647                    |
| Thermal correction to Gibbs Free Energy=     | 0.499323                    |
| Sum of electronic and zero-point Energies=   | -1614.395585                |
| Sum of electronic and thermal Energies=      | -1614.362408                |
| Sum of electronic and thermal Enthalpies=    | -1614.361463                |
| Sum of electronic and thermal Free Energies= | -1614.462788                |

## 5NP-c- TC

C,0,4.9266738817,4.4775899621,-0.920142229  
C,0,3.982271233,2.3196107596,-0.3229452835  
C,0,2.7040430473,2.9118432513,-0.3436185901  
C,0,3.6600156406,5.0641148213,-0.8918994993  
C,0,4.0822389935,0.8946122844,-0.0092803194  
C,0,1.4708392682,2.1052056197,-0.1250036475  
C,0,1.6217376697,0.6192874181,-0.0478238359  
C,0,2.9751880362,0.0947028112,0.0627794873  
C,0,0.5320245593,-0.2121626414,-0.0621786828  
C,0,-0.8674507574,0.1246140422,-0.0998795183  
H,0,5.7974901836,5.0764755023,-1.1692726733  
H,0,3.5398103826,6.1214727702,-1.1041131294  
H,0,-1.1370730865,1.1687311159,-0.0211814041  
O,0,0.3835333468,2.6636036806,-0.0444487175  
H,0,0.7406850325,-1.2739224658,-0.0213792529  
C,0,-1.8566112136,-0.8102757504,-0.1897405968  
C,0,-3.2755505387,-0.4118363807,-0.0527813276  
C,0,-4.2887024654,-1.1174852798,-0.7205617481  
C,0,-3.6495376303,0.6846764808,0.7400781784  
C,0,-5.6181729159,-0.7269789278,-0.6188149625  
H,0,-4.0280771651,-1.9775676427,-1.3303201311  
C,0,-4.9792483442,1.0690983282,0.8446113244  
H,0,-2.8902299722,1.2323018199,1.2896739966  
C,0,-5.9884395763,0.3733605084,0.1648696387  
H,0,-6.3845748576,-1.2981356857,-1.1350028494  
H,0,-5.2394230872,1.9328492095,1.4495738264  
C,0,-1.5772985551,-2.2497464208,-0.4385953725  
C,0,-2.1122988091,-3.2298906269,0.4093436298  
C,0,-0.7965042512,-2.6547784582,-1.5284459713  
C,0,-1.846203027,-4.5779151722,0.1898860336  
H,0,-2.7319525316,-2.9244277896,1.2481643182  
C,0,-0.5403297918,-4.0060305047,-1.7558081565  
H,0,-0.4033368747,-1.9014234054,-2.2065576971  
C,0,-1.0596308877,-4.9700921447,-0.8942653482  
H,0,0.06207459,-4.3029713682,-2.6089860534  
H,0,-0.8593160989,-6.0224041171,-1.0697536302  
C,0,5.2876135377,0.0899880315,0.2650306985  
C,0,4.8760531402,-1.2417238194,0.4355104894  
C,0,6.6378659996,0.4146636452,0.4316806248  
C,0,5.7870323711,-2.2497029466,0.7125563976  
C,0,7.5523530331,-0.5995893818,0.7176406447  
H,0,6.9956996929,1.4345137532,0.3782020682



C,0,7.1389700063,-1.9249551335,0.8458349432  
 H,0,5.4565603338,-3.2783386364,0.8370177056  
 H,0,7.8656048731,-2.7012299127,1.0641284883  
 C,0,2.5529287911,4.2744052378,-0.6126769468  
 H,0,1.5484188452,4.6852258477,-0.6079359609  
 C,0,5.0862924072,3.1252357914,-0.6413228321  
 H,0,6.0739138421,2.6907833757,-0.7088649952  
 C,0,3.3705192674,-1.363054762,0.3059334249  
 C,0,3.0446898457,-2.2739496504,-0.8955115699  
 H,0,3.5046759189,-3.2559675145,-0.7444802162  
 H,0,1.9708515453,-2.4305596834,-1.0240070306  
 H,0,3.4473281688,-1.8453810411,-1.8180031994  
 C,0,2.7946650533,-1.937690492,1.6136410794  
 H,0,3.0461728193,-1.2897156815,2.4581318986  
 H,0,1.7079233555,-2.0476324543,1.5743640015  
 H,0,3.2233284402,-2.927284137,1.8009795611  
 H,0,-2.2555012846,-5.3241801405,0.8636514346  
 C,0,-7.4081343893,0.7876598939,0.2799283525  
 C,0,-7.9289632514,1.2237589937,1.5051243853  
 C,0,-8.2560365015,0.7565735165,-0.8348949104  
 C,0,-9.2593332079,1.619014714,1.6128167717  
 H,0,-7.2915700004,1.2295892535,2.3847836566  
 C,0,-9.5865887241,1.1518205096,-0.727888646  
 H,0,-7.8609797942,0.4454958777,-1.7979852142  
 C,0,-10.0934481117,1.5849985382,0.4963442767  
 H,0,-9.6469191484,1.947783363,2.5721772688  
 H,0,-10.2258728687,1.1314270604,-1.6051006974  
 H,0,-11.1304277972,1.8947066756,0.5794203962  
 H,0,8.6003079141,-0.3482132654,0.8490411453

|                                              |                             |
|----------------------------------------------|-----------------------------|
| Zero-point correction=                       | 0.582254 (Hartree/Particle) |
| Thermal correction to Energy=                | 0.615004                    |
| Thermal correction to Enthalpy=              | 0.615949                    |
| Thermal correction to Gibbs Free Energy=     | 0.515102                    |
| Sum of electronic and zero-point Energies=   | -1616.385282                |
| Sum of electronic and thermal Energies=      | -1616.352531                |
| Sum of electronic and thermal Enthalpies=    | -1616.351587                |
| Sum of electronic and thermal Free Energies= | -1616.452434                |

#### NP-a -TT

C,0,4.992911933,-2.4039666368,0.0236529259  
 C,0,2.9576666402,-1.0767439291,0.0428704217  
 C,0,2.2246084148,-2.2616121458,0.2646289633  
 C,0,4.2600164891,-3.567511657,0.2689350805  
 C,0,2.2501194345,0.2092605202,-0.0797324875

C,0,0.7381798536,-2.2448559529,0.3489249825  
C,0,0.0698006218,-0.9232557763,0.1644289782  
C,0,0.8975242672,0.2486091406,-0.0399367932  
C,0,-1.2936329453,-0.9081539077,0.217064808  
C,0,-2.1334371046,0.2570058323,0.1181903732  
H,0,6.0720792393,-2.4545531956,-0.0845720326  
H,0,4.7647906635,-4.5237493664,0.3601006559  
H,0,-1.6532215979,1.2315717985,0.1326105332  
O,0,0.1040637822,-3.2721711968,0.5463817091  
H,0,-1.7709767841,-1.8721949327,0.379076761  
C,0,-3.4922752811,0.2381257394,0.0426662175  
C,0,-4.2551709194,1.5088373947,0.1090556787  
C,0,-5.4213770806,1.6802685664,-0.6522733099  
C,0,-3.8255298946,2.5670148508,0.9236249256  
C,0,-6.1192017315,2.8837317171,-0.6211507958  
H,0,-5.7707623766,0.8664496182,-1.2809727867  
C,0,-4.5280492368,3.7678816099,0.9595934942  
H,0,-2.9514034647,2.4340080862,1.5541191416  
C,0,-5.6748711339,3.9322098411,0.1838757534  
H,0,-7.0121918969,3.0030140429,-1.2265953958  
H,0,-4.1861604894,4.5718864034,1.6037357507  
H,0,-6.2239727474,4.8679879756,0.2134725373  
C,0,-4.269270538,-1.0151398685,-0.1257190676  
C,0,-5.3955440581,-1.254657902,0.6756729791  
C,0,-3.9131828075,-1.9666253449,-1.0904771423  
C,0,-6.1258394098,-2.4300129235,0.5368343752  
H,0,-5.6872703894,-0.5153340201,1.4164851311  
C,0,-4.6523647093,-3.1384931738,-1.23705825  
H,0,-3.0618624747,-1.7749906031,-1.7372481944  
C,0,-5.756151525,-3.3754277474,-0.4208435957  
H,0,-6.9855418244,-2.6088684917,1.1748695532  
H,0,-4.3643972049,-3.8646917499,-1.9903443983  
H,0,-6.3296665156,-4.2901272687,-0.5324738884  
C,0,3.0100745378,1.4775168814,-0.2450490677  
C,0,2.7610168823,2.3134347163,-1.339101389  
C,0,3.432981852,3.5275642197,-1.4746776893  
C,0,4.619223321,3.0968465014,0.5788716696  
C,0,4.3642862386,3.922145442,-0.5170196154  
H,0,3.2311662117,4.1617131323,-2.3324007224  
H,0,4.8888997321,4.8665266053,-0.6220290536  
C,0,2.8781093015,-3.4909291622,0.3811943862  
H,0,2.2712902003,-4.3740350826,0.5538761724  
H,0,0.4118894405,1.215191466,-0.1385588663  
H,0,2.0434666343,1.9985143143,-2.0916318452

|                                              |                             |
|----------------------------------------------|-----------------------------|
| H,0,5.3372523681,3.4013453551,1.3340701107   |                             |
| C,0,3.9498629064,1.8838740756,0.712379801    |                             |
| H,0,4.141004424,1.2484593398,1.5731767309    |                             |
| C,0,4.3520037996,-1.1756501643,-0.0903727002 |                             |
| H,0,4.9357211322,-0.2851391766,-0.2962835236 |                             |
| Zero-point correction=                       | 0.437159 (Hartree/Particle) |
| Thermal correction to Energy=                | 0.462136                    |
| Thermal correction to Enthalpy=              | 0.463080                    |
| Thermal correction to Gibbs Free Energy=     | 0.379274                    |
| Sum of electronic and zero-point Energies=   | -1268.860148                |
| Sum of electronic and thermal Energies=      | -1268.835171                |
| Sum of electronic and thermal Enthalpies=    | -1268.834227                |
| Sum of electronic and thermal Free Energies= | -1268.918033                |

### 5NP-a- TT

C,0,6.112709459,2.8352069404,0.5068996341  
 C,0,4.3485839201,1.2239467143,0.0710311905  
 C,0,3.5120280588,2.291702251,-0.3021848655  
 C,0,5.2900930811,3.8813107891,0.0841876775  
 C,0,3.8011518612,-0.1318909637,0.0234981717  
 C,0,2.084241764,2.0585870519,-0.6491460982  
 C,0,1.5031893552,0.6886514169,-0.3849703539  
 C,0,2.4618673187,-0.3801882548,-0.1259856451  
 C,0,0.1340732075,0.688496239,-0.4282055114  
 C,0,-0.8597463434,-0.3411763944,-0.2571968259  
 H,0,7.121730363,3.0426028056,0.8500030975  
 H,0,5.6583241741,4.9019664094,0.0832121228  
 H,0,-0.5634742069,-1.3799166091,-0.2609203155  
 O,0,1.4039974485,2.9738261269,-1.0887206954  
 H,0,-0.2743528787,1.6721240062,-0.6508483228  
 C,0,-2.1940656639,-0.0975898275,-0.1235746921  
 C,0,-3.145452324,-1.2365549599,-0.1198834319  
 C,0,-4.2880511336,-1.21058466,0.6942674987  
 C,0,-2.9184433421,-2.368040586,-0.918155486  
 C,0,-5.1607767181,-2.2940282771,0.7286685995  
 H,0,-4.4807246798,-0.3389224205,1.3128521065  
 C,0,-3.7954644887,-3.4481368021,-0.8885836977  
 H,0,-2.0634103882,-2.3862395023,-1.5880947751  
 C,0,-4.9177879892,-3.4168952382,-0.0616865743  
 H,0,-6.0327596938,-2.2613141676,1.3742788744  
 H,0,-3.6090545629,-4.3099604148,-1.5216932244  
 C,0,-2.7576309826,1.2634828178,0.0500756261  
 C,0,-3.880969103,1.6585636004,-0.692023179  
 C,0,-2.2012610919,2.1685411275,0.9639534935

C,0,-4.4121596791,2.9354202671,-0.546262298  
 H,0,-4.3272998262,0.958970754,-1.3933437483  
 C,0,-2.7414227441,3.4432012345,1.1181798631  
 H,0,-1.3507350945,1.8611719176,1.5655297362  
 C,0,-3.8437530439,3.8314479794,0.3602350862  
 H,0,-5.2713601001,3.2324026311,-1.1393087545  
 H,0,-2.2992594181,4.1314883928,1.8312318856  
 C,0,4.5334410224,-1.4087166309,0.1215885999  
 C,0,3.58363145,-2.4414090685,0.1019546288  
 C,0,5.8940782842,-1.7331681673,0.1547511619  
 C,0,3.9580227175,-3.7744045545,0.1717161468  
 C,0,6.2717458158,-3.075067185,0.2175452648  
 H,0,6.6666860794,-0.9773786676,0.0982514323  
 C,0,5.3165544282,-4.0914690043,0.2394945555  
 H,0,3.2099160651,-4.5633583093,0.1608718059  
 H,0,5.6306232414,-5.1290730596,0.2919135939  
 C,0,3.9877170948,3.6047327756,-0.3107191596  
 H,0,3.3067747275,4.3914234923,-0.6189475049  
 C,0,5.6499183814,1.5239902662,0.5013375471  
 H,0,6.2950560665,0.7385222478,0.8703078285  
 C,0,2.1850069767,-1.8781376314,-0.0345687055  
 C,0,1.5663937728,-2.4316581952,-1.3345456468  
 H,0,1.3056941835,-3.4882393095,-1.2117836661  
 H,0,0.6750330821,-1.8871366703,-1.647613794  
 H,0,2.2963223949,-2.3533567031,-2.1453563173  
 C,0,1.4089085305,-2.2397583577,1.2515429125  
 H,0,2.018322713,-1.9843338034,2.1231764569  
 H,0,0.4585523003,-1.7158542596,1.3484460181  
 H,0,1.2141688812,-3.3170751993,1.2774911674  
 H,0,7.3269277356,-3.3287175654,0.2416528481  
 H,0,-4.2619376872,4.8261926183,0.4769860511  
 H,0,-5.6030933119,-4.258278883,-0.0399748739  
 Zero-point correction= 0.500702 (Hartree/Particle)  
 Thermal correction to Energy= 0.528712  
 Thermal correction to Enthalpy= 0.529656  
 Thermal correction to Gibbs Free Energy= 0.440538  
 Sum of electronic and zero-point Energies= -1385.485199  
 Sum of electronic and thermal Energies= -1385.457189  
 Sum of electronic and thermal Enthalpies= -1385.456245  
 Sum of electronic and thermal Free Energies= -1385.545363

**6NP-a- TT**

C,0,-4.6367003027,-2.5600469328,-0.5600772931  
 C,0,-2.6694363327,-1.2373149294,-0.1248391931

C,0,-1.8934392905,-2.4069030809,-0.2932196687  
C,0,-3.8696096289,-3.7107868081,-0.7091685561  
C,0,-2.0061657919,0.041509687,0.1658944686  
C,0,-0.4072092593,-2.3677916484,-0.2104361662  
C,0,0.2127304134,-1.0205757847,-0.0849630568  
C,0,-0.6513275784,0.1161653509,0.1351812689  
C,0,1.5738307631,-0.9524957627,-0.1730872383  
C,0,2.3585706631,0.2540478896,-0.1939655248  
H,0,-5.7124846121,-2.6357064933,-0.6872630561  
H,0,-4.349157145,-4.6568999299,-0.938641726  
H,0,1.8310841807,1.1964583356,-0.3167621743  
O,0,0.2593685579,-3.3912265953,-0.2727235158  
H,0,2.0909678086,-1.9031922805,-0.2860976578  
C,0,3.717783211,0.3093125119,-0.1340639161  
C,0,4.4138396353,1.5977343881,-0.3710421731  
C,0,5.5767601712,1.9292842848,0.340648052  
C,0,3.9178461522,2.5163938493,-1.3081574327  
C,0,6.2060034508,3.1542896333,0.1403833154  
H,0,5.9781058651,1.2245470398,1.0633788541  
C,0,4.5506116367,3.7385990767,-1.5118126496  
H,0,3.0466868886,2.2540121552,-1.9011264254  
C,0,5.6949548694,4.0640097341,-0.7850086125  
H,0,7.0976290791,3.4002885877,0.708680738  
H,0,4.1563584982,4.4322802624,-2.2479179564  
H,0,6.190063055,5.0166358547,-0.9450417927  
C,0,4.5489887989,-0.878092165,0.1804440703  
C,0,5.6980872775,-1.1594207179,-0.5741339916  
C,0,4.2147609443,-1.7295587017,1.2419281926  
C,0,6.471882813,-2.2803649488,-0.2927687366  
H,0,5.9728846722,-0.4986493052,-1.3917461796  
C,0,4.9963564324,-2.8458974171,1.5298995109  
H,0,3.3459781027,-1.5020776928,1.8528645591  
C,0,6.1232080594,-3.1267489996,0.7605228425  
H,0,7.3491038249,-2.4947326603,-0.895117352  
H,0,4.724191707,-3.493715892,2.3569749157  
H,0,6.7307832037,-3.9983253948,0.9827362745  
C,0,-2.8521935651,1.2177072601,0.4622899306  
C,0,-2.2786248551,2.4158128845,0.9303137728  
C,0,-4.2447389854,1.1614083336,0.2881025911  
C,0,-3.0405438374,3.5463771082,1.1677164578  
C,0,-4.9992979428,2.3217124325,0.5185152199  
C,0,-4.417412627,3.5056715862,0.9447883569  
H,0,-2.5662816375,4.4530169896,1.5299512455  
H,0,-5.031421093,4.3840230269,1.1169963001

|                                               |                             |
|-----------------------------------------------|-----------------------------|
| C,0,-2.4903217524,-3.6331913831,-0.5711980168 |                             |
| H,0,-1.8502927594,-4.5019683675,-0.6856282332 |                             |
| C,0,-4.0657047055,-1.3181359966,-0.2603351071 |                             |
| C,0,-4.9843196966,-0.1058091449,-0.1344594196 |                             |
| H,0,-0.166840197,1.0704124614,0.3009786712    |                             |
| H,0,-1.2146997706,2.4632812186,1.130789941    |                             |
| C,0,-5.6553697996,0.1423386565,-1.5045206061  |                             |
| H,0,-6.3441369265,0.9903426859,-1.4512486027  |                             |
| H,0,-4.9003173885,0.3584791159,-2.2659314533  |                             |
| H,0,-6.2238070726,-0.736464938,-1.8226686756  |                             |
| C,0,-6.0686804474,-0.4136580939,0.9242384017  |                             |
| H,0,-5.6089599766,-0.5816856453,1.9023554861  |                             |
| H,0,-6.7763965892,0.413744857,1.0144889221    |                             |
| H,0,-6.6403177267,-1.3049142194,0.6545964942  |                             |
| H,0,-6.073660632,2.2984505321,0.3637880762    |                             |
| Zero-point correction=                        | 0.501473 (Hartree/Particle) |
| Thermal correction to Energy=                 | 0.529126                    |
| Thermal correction to Enthalpy=               | 0.530070                    |
| Thermal correction to Gibbs Free Energy=      | 0.441933                    |
| Sum of electronic and zero-point Energies=    | -1385.498399                |
| Sum of electronic and thermal Energies=       | -1385.470747                |
| Sum of electronic and thermal Enthalpies=     | -1385.469802                |
| Sum of electronic and thermal Free Energies=  | -1385.557940                |

### 5/6NP-a -TT

C,0,-4.6838730665,2.8092142634,0.2216344432  
 C,0,-2.7654005779,1.4003777807,0.1760274789  
 C,0,-1.921440531,2.5027469007,0.3401930675  
 C,0,-3.8528518563,3.9219234144,0.3876537787  
 C,0,-2.1530788269,0.1077365363,0.0776697258  
 C,0,-0.4412159775,2.2895705596,0.3976248668  
 C,0,0.1311507472,0.8758616266,0.2686152096  
 C,0,-0.8340675327,-0.2109899558,0.1175874264  
 C,0,1.4977093298,0.860626373,0.2869230027  
 C,0,2.4233445994,-0.2380972958,0.2035429213  
 H,0,-5.75837587,2.9681452204,0.1791487068  
 H,0,-4.2976513554,4.9086444555,0.4707264856  
 H,0,2.0431933343,-1.2472601365,0.2754940709  
 O,0,0.2916756595,3.2561509929,0.5400025391  
 H,0,1.9448220926,1.8457830628,0.396928549  
 C,0,3.771556458,-0.1064254538,0.0640991966  
 C,0,4.6367727013,-1.3106867868,0.1307556641  
 C,0,5.7792687613,-1.4117138158,-0.6777434569  
 C,0,4.331460923,-2.3755852151,0.9913542747

C,0,6.5749305599,-2.5527953202,-0.6452684101  
H,0,6.0340437918,-0.591638913,-1.3428964251  
C,0,5.1317228921,-3.5137451262,1.0288500709  
H,0,3.477364697,-2.295611363,1.6578602327  
C,0,6.2541646146,-3.6085763376,0.2072997582  
H,0,7.4483876955,-2.6169581838,-1.2866540003  
H,0,4.8853519121,-4.3222874196,1.710140349  
H,0,6.87925871,-4.4954014741,0.23770757  
C,0,4.440250283,1.1967718116,-0.1777734425  
C,0,5.5750779637,1.5475156757,0.5688935319  
C,0,3.9771361538,2.085387954,-1.1566460653  
C,0,6.2111392185,2.7665842529,0.3611958997  
H,0,5.9494886817,0.8586244873,1.3211599002  
C,0,4.6219770021,3.3014793089,-1.3726145728  
H,0,3.1149831975,1.8119171337,-1.7581859292  
C,0,5.736592914,3.6470218019,-0.6118228211  
H,0,7.079532227,3.0297314811,0.957009562  
H,0,4.2507227532,3.978705178,-2.1351049896  
H,0,6.236086253,4.5964631204,-0.7773241723  
C,0,-2.9835169318,-1.0462520718,-0.0807309859  
C,0,-2.1751117008,-2.1780584887,-0.1446401046  
C,0,-4.3657372795,-1.0289303172,-0.1562952512  
C,0,-2.7859391098,-3.4128659732,-0.2968936647  
C,0,-4.9685969676,-2.2842596451,-0.3120800327  
C,0,-4.1887427945,-3.4446158239,-0.3797055491  
H,0,-2.216934918,-4.3376326329,-0.3518873566  
H,0,-4.6871937628,-4.4017178671,-0.500655773  
C,0,-2.4691999134,3.7787845368,0.4482840484  
H,0,-1.809790675,4.6309623077,0.5776089249  
C,0,-4.1664099605,1.5154896443,0.1117195464  
C,0,-0.7077143477,-1.7515109277,-0.0129999138  
C,0,-0.1433794735,-2.3964940512,1.2676124031  
H,0,-0.1050030946,-3.4847738915,1.1506531807  
H,0,0.858983082,-2.043502016,1.5148030202  
H,0,-0.7943694201,-2.1655781864,2.1158405399  
C,0,0.0375598218,-2.1868100267,-1.2879016647  
H,0,-0.4657523776,-1.77788616,-2.1689366995  
H,0,1.0762217967,-1.8541046178,-1.3095493032  
H,0,0.02835159,-3.2790826518,-1.3664981144  
C,0,-5.1131317486,0.3065717257,-0.0730934735  
C,0,-6.0887603032,0.25065393,1.1208174963  
H,0,-6.7849130101,-0.5857713407,1.0054739463  
H,0,-5.543069755,0.1178700525,2.0592605235  
H,0,-6.6768131195,1.1706508299,1.1892273217

|                                              |                             |
|----------------------------------------------|-----------------------------|
| C,0,-5.914026056,0.5010877662,-1.3777537272  |                             |
| H,0,-5.2416041098,0.5457669356,-2.2391810125 |                             |
| H,0,-6.6089819282,-0.331355991,-1.5257065853 |                             |
| H,0,-6.496785318,1.4265150822,-1.3450129624  |                             |
| H,0,-6.049585948,-2.3773681651,-0.3830154842 |                             |
| Zero-point correction=                       | 0.563461 (Hartree/Particle) |
| Thermal correction to Energy=                | 0.594559                    |
| Thermal correction to Enthalpy=              | 0.595503                    |
| Thermal correction to Gibbs Free Energy=     | 0.501010                    |
| Sum of electronic and zero-point Energies=   | -1502.125075                |
| Sum of electronic and thermal Energies=      | -1502.093977                |
| Sum of electronic and thermal Enthalpies=    | -1502.093033                |
| Sum of electronic and thermal Free Energies= | -1502.187526                |

### 5NP-b- TT

C,0,-5.7274299583,3.2978075556,-0.4270060574  
 C,0,-4.0514470282,1.5834782387,-0.0378827478  
 C,0,-3.1380609889,2.5995918267,0.29794324  
 C,0,-4.8276122355,4.2936938737,-0.041472147  
 C,0,-3.5870180073,0.197385784,-0.0005018396  
 C,0,-1.7147601002,2.2828074152,0.596341591  
 C,0,-1.2308837495,0.8771900994,0.3377811559  
 C,0,-2.2607560278,-0.1303316797,0.1111791767  
 C,0,0.1380213863,0.7855827514,0.3593348034  
 C,0,1.0598802613,-0.3045272935,0.1884792923  
 H,0,-6.7333518189,3.5649859666,-0.7368625492  
 H,0,-5.1319270424,5.3352990147,-0.0363040985  
 H,0,0.6948133968,-1.3208848407,0.1734374902  
 O,0,-0.9642853518,3.1634350873,0.9929479568  
 H,0,0.6109543689,1.7431693197,0.5691209534  
 C,0,2.4134616763,-0.150830629,0.0834063488  
 C,0,3.2833305469,-1.3487936156,0.1091081656  
 C,0,4.4631021115,-1.4032644956,-0.6410723919  
 C,0,2.9438602621,-2.4798525947,0.8752556763  
 C,0,5.268841378,-2.5405053477,-0.6581859103  
 H,0,4.7525086177,-0.5443961623,-1.2396711167  
 C,0,3.736075425,-3.6137966333,0.8756008884  
 H,0,2.0585040506,-2.4530220306,1.5040785774  
 C,0,4.9037228433,-3.6545379054,0.1019973422  
 H,0,6.1660904196,-2.5444915532,-1.2652119637  
 H,0,3.4827532787,-4.4805449654,1.4768426727  
 C,0,3.0687669445,1.1666393967,-0.0805231389  
 C,0,4.2005594595,1.4935379357,0.6735269897  
 C,0,2.5923367045,2.1179115403,-0.9996169169



C,0,4.8270096111,2.7316416899,0.5512298848  
 H,0,4.591799193,0.7705167531,1.3840379625  
 C,0,3.2131841243,3.3469493811,-1.1453228012  
 H,0,1.7312670687,1.8766574053,-1.6162663041  
 C,0,4.3303881405,3.6649522153,-0.3640209813  
 H,0,5.690269022,2.953418955,1.1668922912  
 H,0,2.8512700639,4.0821737789,-1.8557991888  
 C,0,-4.3970402764,-1.0339083002,-0.0742692888  
 C,0,-3.5099837392,-2.1210040495,-0.082079157  
 C,0,-5.774782966,-1.2784060251,-0.0648528267  
 C,0,-3.9633770736,-3.429606829,-0.1391866313  
 C,0,-6.2319565846,-2.5960116302,-0.1138455863  
 H,0,-6.4999980951,-0.4788750953,0.0156441283  
 C,0,-5.3395833376,-3.6666699128,-0.1643033161  
 H,0,-3.2625009157,-4.2611492021,-0.1506206065  
 H,0,-5.7156295252,-4.6841390809,-0.2050999275  
 C,0,-3.5323028121,3.9395077856,0.3112261006  
 H,0,-2.79379392,4.6847357933,0.5890440422  
 C,0,-5.3460247056,1.9609732341,-0.4261099417  
 H,0,-6.0505517158,1.2144509646,-0.7662203599  
 C,0,-2.077525751,-1.6417938335,0.0171511754  
 C,0,-1.4640584926,-2.2288262462,1.3052046549  
 H,0,-1.2663868911,-3.2988798545,1.1794022614  
 H,0,-0.5378746595,-1.7339417302,1.5987272131  
 H,0,-2.1723268996,-2.1084689933,2.1301111514  
 C,0,-1.3543694792,-2.0488047472,-1.2858361054  
 H,0,-1.9704141031,-1.7624120956,-2.1431235252  
 H,0,-0.3800753777,-1.5763970727,-1.4071571168  
 H,0,-1.2183356529,-3.135200609,-1.3129851087  
 O,0,4.8661352212,4.8936197617,-0.5702993533  
 O,0,5.6150411663,-4.8077818386,0.1639723132  
 C,0,5.9768599255,5.2727648376,0.2176120701  
 H,0,6.2294917878,6.2873542765,-0.08790628  
 H,0,5.7253122772,5.2641053017,1.2844916133  
 H,0,6.8340195258,4.6131751762,0.0369824468  
 C,0,6.8108110896,-4.8881600244,-0.5861481235  
 H,0,7.2177989798,-5.8807131173,-0.3974668177  
 H,0,6.6134784215,-4.7720708115,-1.6582988472  
 H,0,7.5318063301,-4.1284960736,-0.2619795997  
 H,0,-7.3006207874,-2.787210676,-0.1042720576

|                                          |                             |
|------------------------------------------|-----------------------------|
| Zero-point correction=                   | 0.566920 (Hartree/Particle) |
| Thermal correction to Energy=            | 0.600030                    |
| Thermal correction to Enthalpy=          | 0.600974                    |
| Thermal correction to Gibbs Free Energy= | 0.500330                    |

|                                              |              |
|----------------------------------------------|--------------|
| Sum of electronic and zero-point Energies=   | -1614.386514 |
| Sum of electronic and thermal Energies=      | -1614.353404 |
| Sum of electronic and thermal Enthalpies=    | -1614.352460 |
| Sum of electronic and thermal Free Energies= | -1614.453104 |

### 5NP-c- TT

C,0,6.1581924251,2.7877074644,0.5809049762  
 C,0,4.3801469239,1.1994076888,0.1180334076  
 C,0,3.5525710722,2.2806068247,-0.2362857455  
 C,0,5.344161646,3.8480331751,0.1773920883  
 C,0,3.8209660264,-0.1506125081,0.0473142385  
 C,0,2.1230262619,2.0657432657,-0.5879050082  
 C,0,1.5301885008,0.6965828745,-0.3475877039  
 C,0,2.4794717325,-0.3844172593,-0.1061193283  
 C,0,0.1610541081,0.7084167122,-0.3940629693  
 C,0,-0.8414590205,-0.3153210462,-0.2428797642  
 H,0,7.169165129,2.9805266797,0.9267863854  
 H,0,5.720846377,4.8654552924,0.1943076527  
 H,0,-0.5531640824,-1.356229278,-0.2557956745  
 O,0,1.451038728,2.9941040609,-1.0123606753  
 H,0,-0.2382298038,1.6987916137,-0.6029799814  
 C,0,-2.1755478941,-0.0633480746,-0.1190389004  
 C,0,-3.1345708167,-1.1960365931,-0.1388378173  
 C,0,-4.2821245117,-1.1743873308,0.6683720744  
 C,0,-2.910070157,-2.317004618,-0.9523694433  
 C,0,-5.1622828069,-2.2522153729,0.6813563354  
 H,0,-4.4729330557,-0.3106249412,1.2985385952  
 C,0,-3.7945312683,-3.3914853846,-0.9442344298  
 H,0,-2.0505382581,-2.3311628021,-1.6166137603  
 C,0,-4.9217615635,-3.3648966611,-0.1240031921  
 H,0,-6.0381810008,-2.2229806481,1.3218034291  
 H,0,-3.6098002922,-4.2450858188,-1.5888664183  
 C,0,-2.7326195279,1.2974546369,0.0652524094  
 C,0,-3.8506657217,1.7086532618,-0.6757975822  
 C,0,-2.1821051719,2.1950157591,0.9897325652  
 C,0,-4.3776288125,2.9835068841,-0.5194415516  
 H,0,-4.3047632321,1.0184377879,-1.3813921397  
 C,0,-2.7197452145,3.4670970621,1.1545080558  
 H,0,-1.3305273246,1.8867283151,1.5893707915  
 C,0,-3.8217172629,3.8848699321,0.39967688  
 H,0,-5.2488153092,3.2787887733,-1.0969863247  
 H,0,-2.2628366505,4.1536018756,1.8611375352  
 C,0,4.5417775901,-1.4354993787,0.1229660482  
 C,0,3.5827540784,-2.4592231541,0.0851940076

|                                               |                             |
|-----------------------------------------------|-----------------------------|
| C,0,5.899374841,-1.7726747536,0.1506946398    |                             |
| C,0,3.9451574922,-3.7965775797,0.1318066513   |                             |
| C,0,6.265018689,-3.1188547503,0.190091021     |                             |
| H,0,6.678707068,-1.0229130186,0.1078070918    |                             |
| C,0,5.300746921,-4.1269337558,0.1941358508    |                             |
| H,0,3.1898562924,-4.578368923,0.1072074697    |                             |
| H,0,5.6055061403,-5.1680737687,0.2283773247   |                             |
| C,0,4.0392818572,3.5895030176,-0.2217363798   |                             |
| H,0,3.3650147493,4.3873665971,-0.5155950979   |                             |
| C,0,5.6842974178,1.4807504388,0.5526058611    |                             |
| H,0,6.323005011,0.6834875815,0.9072237091     |                             |
| C,0,2.1892749511,-1.8811402076,-0.0412849379  |                             |
| C,0,1.5659354212,-2.4054140167,-1.3511590632  |                             |
| H,0,1.2936998644,-3.4611217694,-1.2471816267  |                             |
| H,0,0.6809592445,-1.8455978339,-1.655154777   |                             |
| H,0,2.2974439925,-2.3207988048,-2.1599195857  |                             |
| C,0,1.4098837475,-2.2584173284,1.2384022111   |                             |
| H,0,2.0227063574,-2.0262123474,2.1141323618   |                             |
| H,0,0.4655975063,-1.7257318524,1.3460304273   |                             |
| H,0,1.2031636178,-3.3337895295,1.2443411203   |                             |
| H,0,7.3178860684,-3.3822763293,0.2099382824   |                             |
| C,0,-4.3928996699,5.2433535488,0.571094919    |                             |
| C,0,-4.8253126762,5.9810227156,-0.5383910714  |                             |
| C,0,-4.5105783746,5.8153705938,1.8442662669   |                             |
| C,0,-5.3611102329,7.2561739168,-0.379208107   |                             |
| H,0,-4.7147205374,5.5613673951,-1.5342775989  |                             |
| C,0,-5.0467051477,7.0903634545,2.0040797896   |                             |
| H,0,-4.2013227579,5.2457445288,2.7161178747   |                             |
| C,0,-5.474135453,7.8153734158,0.8927717128    |                             |
| H,0,-5.6817219023,7.8177442733,-1.2511551612  |                             |
| H,0,-5.1381617403,7.514896109,2.9990196604    |                             |
| H,0,-5.8915597592,8.8095005593,1.0169621549   |                             |
| H,0,-5.6126752784,-4.2019527572,-0.1189490991 |                             |
| Zero-point correction=                        | 0.582190 (Hartree/Particle) |
| Thermal correction to Energy=                 | 0.614895                    |
| Thermal correction to Enthalpy=               | 0.615839                    |
| Thermal correction to Gibbs Free Energy=      | 0.515353                    |
| Sum of electronic and zero-point Energies=    | -1616.376383                |
| Sum of electronic and thermal Energies=       | -1616.343678                |
| Sum of electronic and thermal Enthalpies=     | -1616.342734                |
| Sum of electronic and thermal Free Energies=  | -1616.443220                |

#### NP-a -TS

C,0,-2.4709982818,-2.7594797773,1.4288371471

C,0,-1.7397234308,-0.7945356352,0.1925282624  
C,0,-0.4026977783,-1.2426027552,0.3256005386  
C,0,-1.1459209054,-3.2161135996,1.5201328854  
C,0,-2.0180687898,0.4408867246,-0.5223544905  
C,0,0.7251732816,-0.4166150868,-0.1314832879  
C,0,0.402282134,0.7646040843,-0.8983990555  
C,0,-0.9756259307,1.1442884724,-1.0421319548  
C,0,1.35351727,1.2634810321,-1.8120030439  
C,0,2.7012000399,0.9419678474,-1.795421025  
H,0,-3.2752537025,-3.3375999223,1.8738265167  
H,0,-0.9244714854,-4.1528437908,2.0213809324  
H,0,3.2553757027,0.9180170801,-2.7295397776  
O,0,1.8991852089,-0.8023096234,0.1219209771  
H,0,0.9587042093,1.7777313896,-2.6889372567  
C,0,3.3532614185,0.5180373815,-0.6167612432  
C,0,4.5469297729,-0.3509417402,-0.7732031424  
C,0,5.7572671058,-0.0659684372,-0.1277925314  
C,0,4.4749519127,-1.4584602671,-1.6293573743  
C,0,6.8768214723,-0.864718277,-0.3496007969  
H,0,5.8259448647,0.7937747199,0.5312658809  
C,0,5.5897423409,-2.2622456209,-1.8390233288  
H,0,3.5244009296,-1.6956112712,-2.0977150718  
C,0,6.7951317107,-1.9641944601,-1.2017663251  
H,0,7.8132643725,-0.6269232064,0.14483121  
H,0,5.5180413318,-3.1257092466,-2.4926431645  
H,0,7.6664478219,-2.5905382167,-1.3660966269  
C,0,3.2335354864,1.3011823835,0.6439390309  
C,0,3.464855603,0.6845591626,1.8835722544  
C,0,2.9445556271,2.6693793944,0.6105937284  
C,0,3.3891729675,1.419040964,3.060163143  
H,0,3.6729444796,-0.3801793824,1.9114366928  
C,0,2.8738649292,3.4060717792,1.7917070743  
H,0,2.7865423101,3.1552524095,-0.3464193952  
C,0,3.0928162919,2.7833327972,3.0175510768  
H,0,3.5562094106,0.9278846395,4.013524479  
H,0,2.6512901861,4.4675602249,1.7506643498  
H,0,3.0366237155,3.3567594119,3.9376556701  
C,0,-3.4083051013,0.9228193276,-0.7378332507  
C,0,-3.7784860709,2.2103192986,-0.3323338375  
C,0,-5.0639834235,2.6933919222,-0.5734769205  
C,0,-5.6443468124,0.6084264321,-1.6325044625  
C,0,-6.0016348019,1.8932847827,-1.2222744647  
H,0,-5.3334964435,3.6935189708,-0.2479424748  
H,0,-7.0035958764,2.2668137652,-1.408813373

|                                               |                             |
|-----------------------------------------------|-----------------------------|
| C,0,-0.1250053809,-2.4505067199,0.9918555686  |                             |
| H,0,0.9124230355,-2.7540575351,1.0829223749   |                             |
| H,0,-1.1871105608,2.0342957666,-1.6319742554  |                             |
| H,0,-3.0504072396,2.8281052683,0.1860543927   |                             |
| H,0,-6.3659825754,-0.0184199712,-2.1474744949 |                             |
| C,0,-4.3600856028,0.1280859501,-1.3923201199  |                             |
| H,0,-4.0797171119,-0.8669463301,-1.7277690236 |                             |
| C,0,-2.7606468069,-1.5712188987,0.7850049324  |                             |
| H,0,-3.7861449308,-1.2208704515,0.7398906611  |                             |
| Zero-point correction=                        | 0.435534 (Hartree/Particle) |
| Thermal correction to Energy=                 | 0.459516                    |
| Thermal correction to Enthalpy=               | 0.460460                    |
| Thermal correction to Gibbs Free Energy=      | 0.380377                    |
| Sum of electronic and zero-point Energies=    | -1268.830132                |
| Sum of electronic and thermal Energies=       | -1268.806150                |
| Sum of electronic and thermal Enthalpies=     | -1268.805206                |
| Sum of electronic and thermal Free Energies=  | -1268.885289                |

#### 5NP-a -TS

C,0,1.968727666,4.2849282554,0.8251950383  
 C,0,1.7571140108,1.9535832137,0.1625488765  
 C,0,0.3503529776,2.1065653548,0.1820993563  
 C,0,0.5723543478,4.4189319958,0.8669367384  
 C,0,2.3014055689,0.6710496588,-0.2258610921  
 C,0,-0.5403760943,0.9751610716,-0.1288266623  
 C,0,0.0538592936,-0.1771915595,-0.7840172223  
 C,0,1.4864533386,-0.2937630217,-0.7643672632  
 C,0,-0.7648314262,-0.9180192672,-1.6627595478  
 C,0,-2.1513706272,-0.9047829629,-1.6385886509  
 H,0,2.6019682978,5.1363722549,1.0555192376  
 H,0,0.1225279108,5.3690642948,1.1361436444  
 H,0,-2.7042260768,-1.0521636248,-2.5620014805  
 O,0,-1.7697209631,1.1040207915,0.1107622777  
 H,0,-0.2832507494,-1.3751721792,-2.5227377862  
 C,0,-2.8676204228,-0.583337567,-0.4673602668  
 C,0,-4.2413356702,-0.0441362313,-0.626181193  
 C,0,-5.3257112335,-0.5706613181,0.0875448962  
 C,0,-4.468179187,0.9860264605,-1.5493230888  
 C,0,-6.613405281,-0.0872352761,-0.1328648322  
 H,0,-5.1618098459,-1.3727728187,0.8002738805  
 C,0,-5.7521954744,1.4763161718,-1.7581875332  
 H,0,-3.6187483798,1.4162635226,-2.0714103473  
 C,0,-6.8288873159,0.9372793666,-1.0524085201  
 H,0,-7.4482113281,-0.5116910794,0.4156062967

H,0,-5.9136688737,2.2841617298,-2.4647661928  
 H,0,-7.831874248,1.3190889961,-1.2158897302  
 C,0,-2.5284967934,-1.2294199811,0.8321543498  
 C,0,-2.8522852308,-0.5984988942,2.0427076091  
 C,0,-1.9318234824,-2.4941621465,0.8650489226  
 C,0,-2.5609928198,-1.2110547186,3.2553765204  
 H,0,-3.3032525979,0.388387982,2.0184159138  
 C,0,-1.6429523419,-3.1090018042,2.0817429438  
 H,0,-1.7041154196,-2.9974875797,-0.068827692  
 C,0,-1.9529135582,-2.4681184819,3.2785602077  
 H,0,-2.8023924483,-0.7060964957,4.1853036411  
 H,0,-1.1788050828,-4.0902499841,2.0913820738  
 H,0,-1.7263045407,-2.945442645,4.2268621808  
 C,0,3.678127204,0.1500174798,-0.13828754  
 C,0,3.6785158593,-1.1432642916,-0.6909394833  
 C,0,4.8583417875,0.6557144576,0.4141473785  
 C,0,4.8320907922,-1.9093016913,-0.7361168631  
 C,0,6.0179028696,-0.1216252582,0.3759737257  
 H,0,4.8954533102,1.6232511746,0.8984571816  
 C,0,6.0142783619,-1.3912060241,-0.1992895565  
 H,0,4.8203669817,-2.9059434311,-1.17169121  
 H,0,6.9251111463,-1.9810499589,-0.2196281403  
 C,0,-0.2245264151,3.3334332621,0.5562911875  
 H,0,-1.3068030427,3.4022017522,0.583611311  
 C,0,2.5486507736,3.0762345996,0.4850872364  
 H,0,3.6266931831,3.0059255104,0.4298075268  
 C,0,2.2960144257,-1.5167759683,-1.1925264495  
 C,0,2.3689643626,-1.6955212621,-2.724267078  
 H,0,3.1387338751,-2.4353135314,-2.9656911106  
 H,0,1.4293026941,-2.0584256591,-3.1465957725  
 H,0,2.6355974409,-0.7532320203,-3.2110274877  
 C,0,1.7839403924,-2.8014826667,-0.5251744198  
 H,0,1.755428887,-2.6870893736,0.5623249427  
 H,0,0.7723167114,-3.0377412017,-0.8720722267  
 H,0,2.4355880492,-3.6459174431,-0.7723238334  
 H,0,6.9334901114,0.2701081211,0.8080982469  
 Zero-point correction= 0.498497 (Hartree/Particle)  
 Thermal correction to Energy= 0.525592  
 Thermal correction to Enthalpy= 0.526536  
 Thermal correction to Gibbs Free Energy= 0.441198  
 Sum of electronic and zero-point Energies= -1385.465199  
 Sum of electronic and thermal Energies= -1385.438104  
 Sum of electronic and thermal Enthalpies= -1385.437160  
 Sum of electronic and thermal Free Energies= -1385.522498

## 6NP-a-TS

C,0,-2.4896084307,-2.7890402837,1.2457753126  
C,0,-1.7358331958,-0.7846095919,0.1325237368  
C,0,-0.4007169857,-1.2297449434,0.3082619149  
C,0,-1.1707312128,-3.2212828048,1.4224971502  
C,0,-1.9944078294,0.4573958392,-0.5730008866  
C,0,0.737448134,-0.4158069064,-0.14280788  
C,0,0.428764787,0.7122878401,-0.9870422032  
C,0,-0.9399996303,1.1060815024,-1.144159198  
C,0,1.39335401,1.1429848265,-1.9220829759  
C,0,2.7385493556,0.8182961004,-1.8624078242  
H,0,-3.293361383,-3.4211920693,1.6118153671  
H,0,-0.9733732299,-4.1666817016,1.9176318819  
H,0,3.3077012699,0.7261184607,-2.783230435  
O,0,1.9052765955,-0.7826696762,0.1608470025  
H,0,1.0120570041,1.5952369001,-2.8383108516  
C,0,3.369868062,0.4775688377,-0.6452838725  
C,0,4.5639418964,-0.4020642701,-0.7202676385  
C,0,5.7658821615,-0.0693387659,-0.0821087917  
C,0,4.5024048835,-1.5707539706,-1.4916669035  
C,0,6.8874196356,-0.8824770711,-0.2276788465  
H,0,5.8267008439,0.8375234552,0.5112534164  
C,0,5.619048032,-2.3881924586,-1.6247785082  
H,0,3.5581353273,-1.8422619182,-1.9541141633  
C,0,6.815991368,-2.0432794735,-0.9952929858  
H,0,7.8173182279,-0.6080211683,0.2600828057  
H,0,5.5551333903,-3.2983990661,-2.2124787182  
H,0,7.6886404607,-2.6804617736,-1.0999627659  
C,0,3.2359904835,1.3517698544,0.553021482  
C,0,3.4479673685,0.8264205408,1.8372583857  
C,0,2.9548483718,2.7151286372,0.4162533165  
C,0,3.3621217822,1.6452681334,2.955992059  
H,0,3.65007621,-0.2343501586,1.9454192763  
C,0,2.8733948158,3.5364452879,1.5394223758  
H,0,2.8110783018,3.1305073868,-0.5755920151  
C,0,3.07401847,3.0041675765,2.8101754591  
H,0,3.5147853354,1.2242672004,3.9446830464  
H,0,2.6565444589,4.5929682702,1.418248016  
H,0,3.0097999902,3.6436054874,3.6851140996  
C,0,-3.3852478954,0.9424913724,-0.6853693916  
C,0,-3.6667442955,2.2039928525,-1.2432861555  
C,0,-4.4550910501,0.1586340142,-0.2228215684  
C,0,-4.9638854917,2.6670409958,-1.3869782924

|                                               |                             |
|-----------------------------------------------|-----------------------------|
| C,0,-5.7627469025,0.6408420427,-0.381469501   |                             |
| C,0,-6.0287074236,1.8728739004,-0.9605432841  |                             |
| H,0,-5.1446233008,3.6448346504,-1.8222866424  |                             |
| H,0,-7.0529430873,2.215529949,-1.0675233974   |                             |
| C,0,-0.1294350958,-2.4375483011,0.9672611703  |                             |
| H,0,0.9060364172,-2.731304016,1.0986774959    |                             |
| C,0,-2.7952606282,-1.5861909815,0.6180585247  |                             |
| C,0,-4.2643134791,-1.2002837495,0.449237225   |                             |
| C,0,-4.9565315868,-2.2785616507,-0.4154788652 |                             |
| H,0,-4.4962587872,-2.3249330149,-1.4066666063 |                             |
| H,0,-4.8712752618,-3.2645298246,0.0501399895  |                             |
| H,0,-6.019712213,-2.0544467108,-0.5397545416  |                             |
| C,0,-4.9253886893,-1.155433614,1.8457861375   |                             |
| H,0,-4.4494101646,-0.3916879954,2.467340675   |                             |
| H,0,-5.9906434939,-0.922916098,1.7703734458   |                             |
| H,0,-4.8315838814,-2.1191205911,2.3531489171  |                             |
| H,0,-1.110126407,1.975953876,-1.7708856004    |                             |
| H,0,-2.8529502608,2.8463573784,-1.559299305   |                             |
| H,0,-6.598392157,0.0363948307,-0.04159286     |                             |
| Zero-point correction=                        | 0.499237 (Hartree/Particle) |
| Thermal correction to Energy=                 | 0.526021                    |
| Thermal correction to Enthalpy=               | 0.526965                    |
| Thermal correction to Gibbs Free Energy=      | 0.442018                    |
| Sum of electronic and zero-point Energies=    | -1385.468865                |
| Sum of electronic and thermal Energies=       | -1385.442082                |
| Sum of electronic and thermal Enthalpies=     | -1385.441137                |
| Sum of electronic and thermal Free Energies=  | -1385.526084                |

### 5/6NP-a -TS

C,0,2.2811683807,3.4907133781,0.5200769505  
 C,0,1.5630780577,1.2963071674,-0.0502414488  
 C,0,0.2160027103,1.6938245071,-0.0762520439  
 C,0,0.9389311453,3.9168323075,0.4821760138  
 C,0,1.8471247446,-0.0557481747,-0.346452597  
 C,0,-0.8342478049,0.6698116379,-0.2857607826  
 C,0,-0.4497838132,-0.6810325544,-0.7097679592  
 C,0,0.9525920987,-1.0124941725,-0.6959703368  
 C,0,-1.3912809739,-1.4296786395,-1.4469654333  
 C,0,-2.7528233678,-1.1728959318,-1.4753972172  
 H,0,3.0476696855,4.2227692055,0.7621861533  
 H,0,0.7128836366,4.9586408986,0.6872147473  
 H,0,-3.3252281897,-1.4097449907,-2.367676094  
 O,0,-2.0303083125,1.0391330149,-0.1261384085  
 H,0,-0.9933894996,-2.1299046728,-2.1782645974



C,0,-3.3970419307,-0.4907019869,-0.4209482869  
C,0,-4.6487405287,0.2413276108,-0.7448086722  
C,0,-5.822149991,0.0594638712,-0.001850507  
C,0,-4.6704302651,1.0970517308,-1.8545900227  
C,0,-6.9974906427,0.7082512799,-0.3740321235  
H,0,-5.818055042,-0.6061399497,0.8555979942  
C,0,-5.8410666594,1.7539780101,-2.2167572798  
H,0,-3.7489257718,1.2623066305,-2.4047202599  
C,0,-7.0090638687,1.5577528462,-1.4785268704  
H,0,-7.9042001181,0.549574207,0.201004669  
H,0,-5.8419639633,2.4252961145,-3.0696041738  
H,0,-7.9237129789,2.0694998965,-1.761467706  
C,0,-3.1993902402,-0.9183895193,0.9938687541  
C,0,-3.43075823,-0.015335747,2.0425152036  
C,0,-2.8311148395,-2.2325615872,1.3001586259  
C,0,-3.2761262635,-0.4157375447,3.3640414272  
H,0,-3.7028146085,1.008343308,1.8058117993  
C,0,-2.6794704919,-2.6340125728,2.6260929329  
H,0,-2.6724603009,-2.9406879273,0.493552062  
C,0,-2.8984261207,-1.7272084212,3.6599693958  
H,0,-3.4450438214,0.2961146045,4.1657969428  
H,0,-2.3936799616,-3.6572407795,2.8486914153  
H,0,-2.7794668644,-2.0393735028,4.6929067755  
C,0,3.1802932678,-0.559198449,-0.2941265649  
C,0,3.1645013106,-1.9180403191,-0.60671612  
C,0,4.2888244224,0.2030950356,0.0228284461  
C,0,4.3753979038,-2.5927710103,-0.6036781639  
C,0,5.5035892806,-0.496904077,0.0249479433  
C,0,5.535364902,-1.8634429689,-0.2806672027  
H,0,4.4501697501,-3.6518404984,-0.8387528838  
H,0,6.4918256293,-2.3772494515,-0.269330692  
C,0,-0.0925793718,3.0331755869,0.2072954708  
H,0,-1.1291014537,3.3532902399,0.2091841433  
C,0,2.6304057948,2.1707817634,0.2638052254  
C,0,1.7161542954,-2.3388302956,-0.9210872091  
C,0,1.6483767141,-2.8522166391,-2.3708967158  
H,0,2.3673694965,-3.6670716608,-2.5051469214  
H,0,0.6587953948,-3.2479162464,-2.6151342527  
H,0,1.8963578514,-2.0560936697,-3.078584602  
C,0,1.2209590953,-3.4201520572,0.0504011195  
H,0,1.3078982655,-3.0793571341,1.0858762318  
H,0,0.1687365544,-3.653843361,-0.1481860427  
H,0,1.8065755449,-4.3381013689,-0.0672003952  
C,0,4.1095972658,1.7006879102,0.3258087145

|                                              |                             |
|----------------------------------------------|-----------------------------|
| C,0,4.9260387818,2.5050779817,-0.7070058502  |                             |
| H,0,4.5529002982,2.3225576124,-1.7186903697  |                             |
| H,0,4.8640276604,3.5785050076,-0.5034923974  |                             |
| H,0,5.9801194729,2.2124414913,-0.6699488515  |                             |
| C,0,4.6582477265,1.982817173,1.7394229119    |                             |
| H,0,4.0907907624,1.426239374,2.4905291368    |                             |
| H,0,5.7084924913,1.6823290084,1.8076374224   |                             |
| H,0,4.5954023359,3.0488682275,1.9779110191   |                             |
| H,0,6.4379531417,0.0067163832,0.2615143386   |                             |
| Zero-point correction=                       | 0.561281 (Hartree/Particle) |
| Thermal correction to Energy=                | 0.591422                    |
| Thermal correction to Enthalpy=              | 0.592366                    |
| Thermal correction to Gibbs Free Energy=     | 0.500999                    |
| Sum of electronic and zero-point Energies=   | -1502.097828                |
| Sum of electronic and thermal Energies=      | -1502.067687                |
| Sum of electronic and thermal Enthalpies=    | -1502.066743                |
| Sum of electronic and thermal Free Energies= | -1502.158110                |

#### 5NP-b -TS

C,0,-2.408000124,-3.189780404,3.1427547581  
 C,0,-2.2721494166,-1.7518597275,1.1837675951  
 C,0,-0.8605711269,-1.8117891261,1.2743306738  
 C,0,-1.0077011978,-3.2222268788,3.2388578817  
 C,0,-2.8569430219,-0.9994256351,0.0978577914  
 C,0,-0.0052319302,-1.0838920543,0.3222778347  
 C,0,-0.6330038893,-0.5777400579,-0.8829244981  
 C,0,-2.0671994934,-0.531415994,-0.9252548609  
 C,0,0.1742485121,-0.4603202272,-2.0399221046  
 C,0,1.5535928239,-0.3732211681,-2.0340356397  
 H,0,-3.013131226,-3.7411330682,3.8562125729  
 H,0,-0.5273084004,-3.7907491387,4.0286492851  
 H,0,2.1166314636,-0.7427713568,-2.8864644223  
 O,0,1.2295757147,-1.0118829514,0.565617016  
 H,0,-0.3076934548,-0.6327586826,-2.9983060445  
 C,0,2.2712884049,0.0888263528,-0.9027283143  
 C,0,3.6565973111,-0.3899520519,-0.7226627239  
 C,0,4.7087226477,0.4742743843,-0.4084195732  
 C,0,3.9490384171,-1.7525174915,-0.9186116269  
 C,0,6.0206609026,0.0127034474,-0.3056018896  
 H,0,4.5099605894,1.5318411857,-0.2664786208  
 C,0,5.2409924719,-2.227597889,-0.8066152723  
 H,0,3.1320212347,-2.4375535496,-1.1243102827  
 C,0,6.2881476002,-1.3440545523,-0.5024870291  
 H,0,6.8136290298,0.7142135383,-0.0773059485

H,0,5.473772148,-3.2789339176,-0.9368196356  
C,0,1.8747210457,1.3478331552,-0.2291521917  
C,0,2.1999520887,1.5705303313,1.1136836867  
C,0,1.1822128934,2.3543488538,-0.9202973939  
C,0,1.8346661778,2.7451205477,1.7633549239  
H,0,2.7113240958,0.7893571756,1.6672298596  
C,0,0.8189308826,3.5328866507,-0.2909253037  
H,0,0.9393085822,2.2070637378,-1.9674171244  
C,0,1.1371616962,3.7326323384,1.0576606815  
H,0,2.0844396802,2.8732819548,2.8094692281  
H,0,0.2875159888,4.3166432488,-0.8200543819  
C,0,-4.2532422012,-0.590756071,-0.1405674185  
C,0,-4.2923941916,0.0933883683,-1.3689441027  
C,0,-5.4251429655,-0.7019839435,0.6135874162  
C,0,-5.4728117205,0.6225642742,-1.864817567  
C,0,-6.6124591435,-0.1598259198,0.116331933  
H,0,-5.4364843918,-1.1725537473,1.5884750065  
C,0,-6.6456432295,0.4920427982,-1.1150021742  
H,0,-5.4897428708,1.1438369969,-2.8193999043  
H,0,-7.5774972633,0.9073237065,-1.4854145072  
C,0,-0.2472158996,-2.5311923869,2.3152813924  
H,0,0.8366218505,-2.5332250369,2.361959509  
C,0,-3.0263863575,-2.4667930192,2.1395408353  
H,0,-4.1055535175,-2.4833448193,2.0672899793  
C,0,-2.9158626686,0.1379684392,-2.005896344  
C,0,-2.9685703066,-0.666140502,-3.3228622955  
H,0,-3.7584811957,-0.2607495371,-3.9631961277  
H,0,-2.0343745055,-0.6073156882,-3.8856996064  
H,0,-3.1954072367,-1.7172325602,-3.1236090326  
C,0,-2.4682407677,1.5820978869,-2.2736077054  
H,0,-2.4519465672,2.1598647737,-1.3448938976  
H,0,-1.4624960566,1.5996525959,-2.7066980931  
H,0,-3.1509307781,2.0690531179,-2.9776972064  
O,0,0.7358467121,4.9119454386,1.5920703864  
C,0,1.0155313887,5.1511477847,2.9574374531  
H,0,0.6029526682,6.1341799339,3.1802115479  
H,0,0.536744505,4.3997400233,3.5955228673  
H,0,2.0956634586,5.1568981245,3.1442355884  
O,0,7.5202357096,-1.9001589786,-0.4163169564  
C,0,8.6084414483,-1.0560098363,-0.0947112704  
H,0,8.4666635435,-0.586962601,0.8856602074  
H,0,9.4879984454,-1.6976180132,-0.0679173569  
H,0,8.7443347814,-0.2800484122,-0.8567606141  
H,0,-7.5211371281,-0.2442095895,0.7045922123

|                                              |                             |
|----------------------------------------------|-----------------------------|
| Zero-point correction=                       | 0.564676 (Hartree/Particle) |
| Thermal correction to Energy=                | 0.596874                    |
| Thermal correction to Enthalpy=              | 0.597818                    |
| Thermal correction to Gibbs Free Energy=     | 0.500751                    |
| Sum of electronic and zero-point Energies=   | -1614.367908                |
| Sum of electronic and thermal Energies=      | -1614.335711                |
| Sum of electronic and thermal Enthalpies=    | -1614.334766                |
| Sum of electronic and thermal Free Energies= | -1614.431833                |

### 5NP-c- TS

C,0,-2.8267619631,-2.4441044248,3.7080957546  
 C,0,-2.3946412929,-1.5395188103,1.4911908779  
 C,0,-1.0541092,-1.9788504256,1.6056498987  
 C,0,-1.4887888628,-2.8520950786,3.8225605746  
 C,0,-2.8006344874,-0.8907726861,0.2641578777  
 C,0,-0.0803948223,-1.7341295863,0.5279210619  
 C,0,-0.6077933683,-1.3467085005,-0.7686065045  
 C,0,-1.970966209,-0.8953954864,-0.8299613103  
 C,0,0.1218326721,-1.7405969561,-1.9111456114  
 C,0,1.4649547369,-2.0834383559,-1.9030646949  
 H,0,-3.5245352587,-2.6414780839,4.5162867369  
 H,0,-1.1467532993,-3.3577528146,4.7197331143  
 H,0,1.8359685027,-2.8113673668,-2.6190063088  
 O,0,1.1366281066,-1.9548249524,0.7657435309  
 H,0,-0.4469816544,-1.9676727544,-2.8085185478  
 C,0,2.3448126136,-1.6053249235,-0.9093442659  
 C,0,3.5542945019,-2.4130867126,-0.6127237138  
 C,0,4.8303489273,-1.8370937712,-0.5645890923  
 C,0,3.4221909042,-3.7954104349,-0.4213953048  
 C,0,5.9528940582,-2.6329731269,-0.3478129897  
 H,0,4.9441219553,-0.7684676477,-0.7174744471  
 C,0,4.5424025605,-4.5860721142,-0.1918779572  
 H,0,2.4271851755,-4.2303083131,-0.4213347268  
 C,0,5.8115122643,-4.0061847491,-0.1584745051  
 H,0,6.9381311502,-2.1783312798,-0.325893137  
 H,0,4.4266333323,-5.6530523044,-0.0304229872  
 H,0,6.6866715651,-4.6232607295,0.0197719123  
 C,0,2.3813218714,-0.1591637755,-0.5608414281  
 C,0,2.8411262291,0.258321336,0.6970174211  
 C,0,2.0054437621,0.8140854376,-1.4921242944  
 C,0,2.8962778236,1.6068210479,1.0170998797  
 H,0,3.1308965271,-0.4894541575,1.4283173499  
 C,0,2.0657749089,2.1662528652,-1.1705675708  
 H,0,1.6650578834,0.5053202755,-2.4750548761

C,0,2.5069220447,2.5850878532,0.0893596312  
 H,0,3.2638131121,1.9119947555,1.9924819301  
 H,0,1.744418279,2.9047996405,-1.8994456693  
 C,0,-4.0343307575,-0.1530241054,-0.0651381025  
 C,0,-3.9454063513,0.2426455558,-1.4117655398  
 C,0,-5.1436835329,0.2403255152,0.6889849107  
 C,0,-4.9518760559,0.9777189113,-2.0169799668  
 C,0,-6.1527514889,0.9892903287,0.07969022  
 H,0,-5.2323484985,0.0065503085,1.7423307826  
 C,0,-6.0681207717,1.3522008075,-1.2633807126  
 H,0,-4.8735243519,1.2724043407,-3.0610866888  
 H,0,-6.8619883866,1.9347704315,-1.7198148018  
 C,0,-0.6129025607,-2.6108102719,2.781272488  
 H,0,0.4283306139,-2.9095503809,2.8394972855  
 C,0,-3.2688727994,-1.7971078858,2.5685259189  
 H,0,-4.3115719244,-1.5197868354,2.4908993686  
 C,0,-2.6506848186,-0.2456242112,-2.034249533  
 C,0,-3.0006303618,-1.2492938458,-3.1540012151  
 H,0,-3.6820764829,-0.7732601498,-3.8661223089  
 H,0,-2.1205801422,-1.5704196825,-3.7156023282  
 H,0,-3.4987472168,-2.1309892556,-2.7411399823  
 C,0,-1.8231966256,0.9195241556,-2.5963243365  
 H,0,-1.595748414,1.6466999967,-1.811457114  
 H,0,-0.8774560132,0.5542808951,-3.0108814102  
 H,0,-2.3728605078,1.4269096017,-3.395832938  
 C,0,2.5672771002,4.026284875,0.4358448451  
 C,0,3.0015951522,4.9715367883,-0.5023033819  
 C,0,2.1887962617,4.4701535696,1.709469174  
 C,0,3.0566139389,6.32400771,-0.1759661274  
 H,0,3.3214920322,4.6391967076,-1.4858790875  
 C,0,2.2429639758,5.8225154954,2.0360047156  
 H,0,1.8244050114,3.7518324474,2.4383549153  
 C,0,2.6774731462,6.7543871911,1.094600366  
 H,0,3.4041659014,7.0417410526,-0.912571804  
 H,0,1.9363119071,6.1498353365,3.0245629583  
 H,0,2.7197887577,7.8086207959,1.3491267691  
 H,0,-7.0123922264,1.297561448,0.6666553833  
 Zero-point correction= 0.579877 (Hartree/Particle)  
 Thermal correction to Energy= 0.611712  
 Thermal correction to Enthalpy= 0.612656  
 Thermal correction to Gibbs Free Energy= 0.515622  
 Sum of electronic and zero-point Energies= -1616.356767  
 Sum of electronic and thermal Energies= -1616.324932  
 Sum of electronic and thermal Enthalpies= -1616.323988

Sum of electronic and thermal Free Energies=

-1616.421022

**NP-a-CC**

C,0,-5.5695707177,-2.5172973527,-0.2014213485  
C,0,-3.567986111,-1.141472359,-0.116645081  
C,0,-2.7959392152,-2.3223796443,-0.1468856041  
C,0,-4.7955340391,-3.6778447098,-0.2579775498  
C,0,-2.8993438843,0.1679981889,0.0031881471  
C,0,-1.3081579004,-2.2771603751,-0.0674560903  
C,0,-0.6853761862,-0.920581283,0.0215986929  
C,0,-1.5543107016,0.2324374726,0.1322854216  
C,0,0.6682378403,-0.8533456024,-0.0830152993  
C,0,1.5393585662,0.3155469263,-0.1229719443  
H,0,-6.6532507358,-2.586123673,-0.2071687591  
H,0,-5.2710769278,-4.6513793462,-0.3184360833  
H,0,2.4791739003,0.1781159137,0.4109487835  
O,0,-0.6414863932,-3.3008840613,-0.088236624  
H,0,1.1760462683,-1.8180023783,-0.1012408916  
C,0,1.3939483419,1.4881092728,-0.7922314446  
C,0,2.4042212203,2.5649277922,-0.6204812432  
C,0,2.7445278192,3.396540652,-1.6970432489  
C,0,3.0429079412,2.7700068705,0.6107646476  
C,0,3.7169135601,4.3822045903,-1.5543297503  
H,0,2.249019654,3.2578809334,-2.6537029902  
C,0,4.0123797312,3.7582290153,0.7543425634  
H,0,2.7581166967,2.1651306575,1.4668697465  
C,0,4.3560734033,4.5655720799,-0.329123149  
H,0,3.9752795691,5.0084293832,-2.4026518384  
H,0,4.4908448123,3.9064174758,1.7175955029  
H,0,5.1097490283,5.3385804576,-0.2163107056  
C,0,0.2809309065,1.7490073992,-1.7447159435  
C,0,-0.4871646559,2.9152677381,-1.6160044602  
C,0,-0.0527505423,0.8237193273,-2.7371331004  
C,0,-1.6030630734,3.1205090928,-2.4199032475  
H,0,-0.2251180292,3.6427154964,-0.8511671477  
C,0,-1.1580629506,1.0392693214,-3.5581339626  
H,0,0.5474928662,-0.0746943181,-2.8500012166  
C,0,-1.9425890444,2.1791473838,-3.3918681022  
H,0,-2.2192197232,4.00324733,-2.2748950103  
H,0,-1.4105077023,0.3114924653,-4.3233232056  
H,0,-2.8170234716,2.3351898506,-4.0166718302  
C,0,-3.667404097,1.4392341532,-0.061524879  
C,0,-3.4667668372,2.4454431476,0.8901059891  
C,0,-4.0901817325,3.6849500071,0.7587006026

|                                               |                             |
|-----------------------------------------------|-----------------------------|
| C,0,-5.1433915114,2.9370389783,-1.2755159577  |                             |
| C,0,-4.9306962105,3.9351776785,-0.3243421063  |                             |
| H,0,-3.9246969585,4.4533924667,1.5077399391   |                             |
| H,0,-5.4189523236,4.8994782084,-0.4256991754  |                             |
| C,0,-3.4111020101,-3.5738750719,-0.2205723771 |                             |
| H,0,-2.7741638046,-4.4525767248,-0.2414283209 |                             |
| H,0,-1.0864408819,1.2010661771,0.2588619577   |                             |
| H,0,-2.8178256198,2.2484620899,1.7391346553   |                             |
| H,0,-5.7899554034,3.1259911065,-2.1274382899  |                             |
| C,0,-4.5167585123,1.7010705368,-1.1453552102  |                             |
| H,0,-4.6548399664,0.9393544145,-1.9084280649  |                             |
| C,0,-4.9655255016,-1.2666919709,-0.1278525757 |                             |
| H,0,-5.5839111196,-0.3783101805,-0.0597069297 |                             |
| Zero-point correction=                        | 0.436736 (Hartree/Particle) |
| Thermal correction to Energy=                 | 0.461495                    |
| Thermal correction to Enthalpy=               | 0.462439                    |
| Thermal correction to Gibbs Free Energy=      | 0.380583                    |
| Sum of electronic and zero-point Energies=    | -1268.856737                |
| Sum of electronic and thermal Energies=       | -1268.831979                |
| Sum of electronic and thermal Enthalpies=     | -1268.831034                |
| Sum of electronic and thermal Free Energies=  | -1268.912891                |

#### NP-a-TT

C,0,-2.9666352358,-1.0817943722,3.2325721986  
 C,0,-2.4601318974,-0.6322727944,0.9004367465  
 C,0,-1.1815019589,-1.1886792426,1.1045904716  
 C,0,-1.706054373,-1.6538026102,3.4169962582  
 C,0,-2.8176506344,-0.1038389919,-0.4293866371  
 C,0,-0.1758021955,-1.2253318792,0.0075377845  
 C,0,-0.4786219786,-0.3870187456,-1.1908284377  
 C,0,-1.8668456363,0.0063502583,-1.3848471432  
 C,0,0.4523713295,0.0042608964,-2.1021016443  
 C,0,1.9058390573,-0.0843125439,-2.0903107675  
 H,0,-3.6641167409,-1.0264522912,4.0629827666  
 H,0,-1.4206611777,-2.0488290662,4.3867717997  
 H,0,2.3507776392,-0.262221078,-3.0684626785  
 O,0,0.8232846512,-1.9200251486,0.0923615277  
 H,0,0.0496077027,0.4819363042,-2.998502255  
 C,0,2.757014515,0.137513466,-1.0601590573  
 C,0,4.2157046056,-0.0592093844,-1.2498931982  
 C,0,5.1375061146,0.7838058511,-0.612551919  
 C,0,4.701586582,-1.0912436742,-2.0647478534  
 C,0,6.5049848045,0.6192058209,-0.8113966293  
 H,0,4.7735034901,1.577966976,0.0331248816

|                                               |                             |
|-----------------------------------------------|-----------------------------|
| C,0,6.0696852878,-1.2587668805,-2.2590390992  |                             |
| H,0,3.9989656936,-1.783432918,-2.519358899    |                             |
| C,0,6.9759268425,-0.4010319574,-1.6371144812  |                             |
| H,0,7.2049881657,1.2877806599,-0.3198615351   |                             |
| H,0,6.4289967007,-2.0700790042,-2.8845645028  |                             |
| H,0,8.0430229365,-0.5340622193,-1.7858881498  |                             |
| C,0,2.2983127529,0.5941467764,0.2767156095    |                             |
| C,0,2.719126491,-0.0853638689,1.4268901915    |                             |
| C,0,1.4169246605,1.6721173738,0.4126252455    |                             |
| C,0,2.2340053811,0.2800512717,2.6798487717    |                             |
| H,0,3.4020931153,-0.9241057239,1.3270211231   |                             |
| C,0,0.9325982221,2.0390982726,1.6653941439    |                             |
| H,0,1.1013489396,2.2141442657,-0.4743719532   |                             |
| C,0,1.3333035387,1.3374674538,2.8018167807    |                             |
| H,0,2.5538919291,-0.2672924286,3.5614841137   |                             |
| H,0,0.2424934596,2.8723830896,1.7540169369    |                             |
| H,0,0.9471719965,1.6153046115,3.7776911269    |                             |
| C,0,-4.2135125284,0.3164090904,-0.7230929103  |                             |
| C,0,-4.4835936545,1.5903432146,-1.2345297702  |                             |
| C,0,-5.786839986,1.9668922209,-1.5555414744   |                             |
| C,0,-6.5817273252,-0.1981103927,-0.8562132636 |                             |
| C,0,-6.8394217311,1.074347596,-1.3668823434   |                             |
| H,0,-5.9799039494,2.9612322358,-1.9465311292  |                             |
| H,0,-7.8547564569,1.3669257205,-1.6155880825  |                             |
| C,0,-0.818132232,-1.7053741794,2.3498952564   |                             |
| H,0,0.1751608302,-2.1312600362,2.4544000324   |                             |
| H,0,-2.1355383009,0.4227505265,-2.3541824766  |                             |
| H,0,-3.6642647175,2.2918434782,-1.365983306   |                             |
| H,0,-7.3955916256,-0.9025411772,-0.7140852109 |                             |
| C,0,-5.2808537976,-0.5724786289,-0.5343542666 |                             |
| H,0,-5.0801840809,-1.5680846799,-0.147254309  |                             |
| C,0,-3.3420116252,-0.5802239198,1.9905606962  |                             |
| H,0,-4.3237685949,-0.1355205932,1.8660219198  |                             |
| Zero-point correction=                        | 0.436491 (Hartree/Particle) |
| Thermal correction to Energy=                 | 0.461347                    |
| Thermal correction to Enthalpy=               | 0.462291                    |
| Thermal correction to Gibbs Free Energy=      | 0.379519                    |
| Sum of electronic and zero-point Energies=    | -1268.849988                |
| Sum of electronic and thermal Energies=       | -1268.825132                |
| Sum of electronic and thermal Enthalpies=     | -1268.824188                |
| Sum of electronic and thermal Free Energies=  | -1268.906960                |



## 8. Reference

1. M.J. Frisch, G.W. Trucks, H.B. Schlegel, G.E.R. Scuseria, M. A.; Cheeseman, J. R.; Scalmani, G.; Barone, V.; Mennucci, B.; Petersson, G. A.; Nakatsuji, H.; Caricato, M.; Li, X.; Hratchian, H. P.; Izmaylov, A. F.; Bloino, J.; Zheng, G.; Sonnenberg, J. L.; Hada, M.; Ehara, M.; Toyota, K.; Fukuda, R.; Hasegawa, J.; Ishida, M.; Nakajima, T.; Honda, Y.; Kitao, O.; Nakai, H.; Vreven, T.; Montgomery, J. A., Jr.; Peralta, J. E.; Ogliaro, F.; Bearpark, M.; Heyd, J. J.; Brothers, E.; Kudin, K. N.; Staroverov, V. N.; Kobayashi, R.; Normand, J.; Raghavachari, K.; Rendell, A.; Burant, J. C.; Iyengar, S. S.; Tomasi, J.; Cossi, M.; Rega, N.; Millam, J. M.; Klene, M.; Knox, J. E.; Cross, J. B.; Bakken, V.; Adamo, C.; Jaramillo, J.; Gomperts, R.; Stratmann, R. E.; Yazyev, O.; Austin, A. J.; Cammi, R.; Pomelli, C.; Ochterski, J. W.; Martin, R. L.; Morokuma, K.; Zakrzewski, V. G.; Voth, G. A.; Salvador, P.; Dannenberg, J. J.; Dapprich, S.; Daniels, A. D.; Farkas, O.; Foresman, J. B.; Ortiz, J. V.; Cioslowski, J.; Fox, D. J. , Gaussian 09, revision B01, Gaussian Inc.: Wallingford, CT, 2013.
2. A. V. Marenich, C. J. Cramer, D. G. Truhlar, *J. Phys. Chem. B* 2009, **113**, 6378-6396.
3. J. P. Foster, F. Weinhold, *J. Am. Chem. Soc.* 1980, **102**, 7211-7218.
4. A. E. Reed, R. B. Weinstock, F. Weinhold, *J. Chem. Phys.* 1985, **83**, 735-746.
5. E. R. Johnson, S. Keinan, P. Mori-Sánchez, J. Contreras-García, A. J. Cohen, W. Yang, *J. Am. Chem. Soc.* 2010, **132**, 6498-6506.
6. J. Contreras-García, E. R. Johnson, S. Keinan, R. Chaudret, J.-P. Piquemal, D. N. Beratan, W. Yang, *J. Chem. Theory Comput.* 2011, **7**, 625-632.
7. T. Lu, F. Chen, *J. Comput. Chem.* 2012, **33**, 580-592.
8. T. Lu, F. Chen, *J. Mol. Graphics Modell.* 2012, **38**, 314-323.
9. C. Legault, Y. Universitede Sherbrooke: Que bec, Montreal, Canada, 2009;<http://www.cylview.org>.
10. W. Humphrey, A. Dalke, K. Schulten, *J. Mol. Graphics*, 1996, **14**, 33-38.
11. I. Olaizola, T. E. Campano, I. Iriarte, S. Vera, A. Mielgo, J. M. García, J.M. Odriozola, M. Oiarbide, C. Palomo, *Chem. Eur. J.* 2018, **24**, 3893-3901.
12. C. J. Blackwell, C. D. Gabbutt, J. T. Guthrie, M. Heron, *Dyes Pigments*, 2012, **95**, 408-420.
13. F. Ercole, N. Malic, T. Davis, R. Evans, *J. Mater. Chem.*, 2009, **19**, 5612-5623.
14. T. Ishiyama, H. Isou, T. Kikuchia, N. Miyaura, *Chem. Commun.*, 2010, **46**, 159-161.
15. S. Kawamorita, H. Ohmiya, K. Hara, A. Fukuoka, M. Sawamura, *J. Am. Chem. Soc.* 2009, **131**, 5058-5059.
16. K. Mutoh, Y. Kobayashi, Y. Hirao, T. Kubob, J. Abe, *Chem. Commun.*, 2016, **52**, 6797-6800.
17. A. H. Choon, S. M. Ran, C. Y. Jun, K. H. Joo, K. B. Ok, K. S. Min, WO2011/115378.
